# Supplementary material for: Evaluating the efficacy and safety of transdermal electrical stimulation on the visual functions of patients with retinitis pigmentosa: a clinical trial protocol for a prospective, multicentre, randomised, double-masked and sham-controlled design (ePICO trial)
Source: PubMed Central journal article supplement — BMJ Open. 2022 May 6;12(5):e057193. doi: 10.1136/bmjopen-2021-057193 (PMC9083404; doi:10.1136/bmjopen-2021-057193), 2022-05-06
Supplement: bmjopen-2021-057193.draft_revisions.pdf [file bmjopen-2021-057193.draft_revisions.pdf]

# BMJ Open

BMJ Open is committed to open peer review. As part of this commitment we make the peer review history of every article we publish publicly available.

When an article is published we post the peer reviewers' comments and the authors' responses online. We also post the versions of the paper that were used during peer review. These are the versions that the peer review comments apply to.

The versions of the paper that follow are the versions that were submitted during the peer review process. They are not the versions of record or the final published versions. They should not be cited or distributed as the published version of this manuscript.

BMJ Open is an open access journal and the full, final, typeset and author-corrected version of record of the manuscript is available on our site with no access controls, subscription charges or pay-per-view fees (<http://bmjopen.bmj.com>).

If you have any questions on BMJ Open's open peer review process please email [info.bmjopen@bmj.com](mailto:info.bmjopen@bmj.com)

# BMJ Open

**Evaluating the efficacy and safety of transdermal electrical stimulation on the visual functions of patients with retinitis pigmentosa: a clinical trial protocol for a prospective, multi-center, randomized, double-blinded, and sham-controlled design (ePICO trial)**

|                               |                                                                                                                                                                                                                                                                                                                                                                                                                                                                                                                                                                                                                                                                                                                                                                                                                                                     |
|-------------------------------|-----------------------------------------------------------------------------------------------------------------------------------------------------------------------------------------------------------------------------------------------------------------------------------------------------------------------------------------------------------------------------------------------------------------------------------------------------------------------------------------------------------------------------------------------------------------------------------------------------------------------------------------------------------------------------------------------------------------------------------------------------------------------------------------------------------------------------------------------------|
| Journal:                      | <i>BMJ Open</i>                                                                                                                                                                                                                                                                                                                                                                                                                                                                                                                                                                                                                                                                                                                                                                                                                                     |
| Manuscript ID                 | bmjopen-2021-057193                                                                                                                                                                                                                                                                                                                                                                                                                                                                                                                                                                                                                                                                                                                                                                                                                                 |
| Article Type:                 | Protocol                                                                                                                                                                                                                                                                                                                                                                                                                                                                                                                                                                                                                                                                                                                                                                                                                                            |
| Date Submitted by the Author: | 07-Sep-2021                                                                                                                                                                                                                                                                                                                                                                                                                                                                                                                                                                                                                                                                                                                                                                                                                                         |
| Complete List of Authors:     | Miura, Gen ; Chiba University Graduate School of Medicine School of Medicine, Department of Ophthalmology and Visual Science<br>Ozawa, Yoshihito; Chiba University Hospital, Clinical Research Center<br>Shiko, Yuki; Chiba University Hospital, Clinical Research Center<br>Kawasaki, Yohei; Chiba University Hospital, Clinical Research Center<br>Iwase, Takayuki; Chiba University Hospital, Clinical Research Center<br>Fujiwara, Tadami; Chiba University Hospital, Clinical Research Center<br>Baba, Takayuki; Chiba University Graduate School of Medicine School of Medicine, Department of Ophthalmology and Visual Science<br>Hanaoka, Hideki; Chiba University Hospital, Clinical Research Center<br>Yamamoto, Shuichi; Chiba University Graduate School of Medicine School of Medicine, Department of Ophthalmology and Visual Science |
| Keywords:                     | Vitreoretinal < OPHTHALMOLOGY, Medical ophthalmology < OPHTHALMOLOGY, Neuro-ophthalmology < OPHTHALMOLOGY                                                                                                                                                                                                                                                                                                                                                                                                                                                                                                                                                                                                                                                                                                                                           |
|                               |                                                                                                                                                                                                                                                                                                                                                                                                                                                                                                                                                                                                                                                                                                                                                                                                                                                     |

SCHOLARONE™  
Manuscripts

1  
2  
3  
4 1 **Evaluating the efficacy and safety of transdermal electrical stimulation on the**  
5  
6  
7 2 **visual functions of patients with retinitis pigmentosa: a clinical trial protocol**  
8  
9  
10 3 **for a prospective, multi-center, randomized, double-blinded, and sham-**  
11  
12  
13 4 **controlled design (ePICO trial)**  
14  
15  
16 5  
17  
18  
19 6  
20  
21

22 7 Gen Miura<sup>1\*</sup>, Yoshihito Ozawa<sup>2</sup>, Yuki Shiko<sup>2</sup>, Yohei Kawasaki<sup>2</sup>, Takayuki Iwase<sup>2</sup>,  
23  
24  
25 8 Tadami Fujiwara<sup>2</sup>, Takayuki Baba<sup>1</sup>, Hideki Hanaoka<sup>2</sup>, Shuichi Yamamoto<sup>1</sup>  
26  
27

28 9 <sup>1</sup>Department of Ophthalmology and Visual Science, Chiba University Graduate  
29  
30  
31 10 School of Medicine, Chiba, Japan,  
32  
33

34 11 <sup>2</sup>Clinical Research Center, Chiba University Hospital, Chiba, Japan.  
35  
36

37 12 Correspondence: Gen Miura, MD, PhD  
38  
39

40 13 Department of Ophthalmology and Visual Science, Chiba University Graduate  
41  
42

43 14 School of Medicine, Inohana 1-8-1, Chuo-ku, Chiba 260-8670, Japan;  
44  
45

46 15 Tel/Fax: 81-43-226-2124/81-43-224-4162  
47  
48

49 16 E-mail: gmiura2@chiba-u.jp  
50  
51

52 17  
53  
54  
55  
56  
57  
58  
59  
60

1  
2  
3  
4 18 **ABSTRACT**

5  
6  
7 19 **Introduction:** Previously, we conducted a phase II clinical trial to evaluate the safety  
8  
9  
10 20 and efficacy of transdermal electrical stimulation (TdES) with skin electrodes to  
11  
12  
13 21 improve the visual functions in patients with retinitis pigmentosa (RP). No adverse  
14  
15  
16 22 events were related to the treatment during follow-up examinations, and TdES  
17  
18  
19 23 significantly improved the mean visual acuity and visual field sensitivity.

20  
21  
22 24 **Methods and analysis:** We developed a study protocol for a prospective, multi-  
23  
24  
25 25 center, randomized, double-blinded, and sham-controlled phase III clinical trial,  
26  
27  
28 26 planned to commence on June 2021. We intend to compare the maintenance,  
29  
30  
31 27 improvement effect, and safety of TdES using skin electrodes between patients with  
32  
33  
34 28 RP and the sham group. The primary endpoint comprises the superiority of the  
35  
36  
37 29 logarithm of the minimum angle of resolution (logMAR) visual acuity change at week  
38  
39  
40 30 24 from baseline in the treatment and sham groups. Secondary endpoints involve  
41  
42  
43 31 the comparison of the treatment and sham groups at week 24 for the logMAR visual  
44  
45  
46 32 acuity, early treatment diabetic retinopathy study visual acuity, the mean deviation  
47  
48  
49 33 value of Humphrey field analyzer 10-2, monocular Humphrey Esterman visual field  
50  
51  
52 34 test score, ellipsoid zone length, central foveal thickness, and 25-item National Eye  
53  
54  
55 35 Institute Visual Function Questionnaire score. We intend to enroll 50 patients from  
56  
57  
58 36 three Japanese institutions within 1 year and follow them up for 2 years.

1  
2  
3  
4 37 **Ethics and dissemination:** The protocol was approved by the institutional review  
5  
6  
7 38 board at the Chiba University Hospital and two other institutions, and was registered  
8  
9  
10 39 with the Japan Registry of Clinical Trials on May 17, 2021. The trial will be conducted  
11  
12  
13 40 in accordance with the principles of the Declaration of Helsinki, and is in accordance  
14  
15  
16 41 with Good Clinical Practice standards. The findings will be published in a peer-  
17  
18  
19 42 reviewed journal.

20  
21  
22 43 **Trial registration number**

23  
24  
25 44 Japan Registry of Clinical Trials (JRCT2032210094).  
26  
27  
28  
29  
30  
31  
32  
33  
34  
35  
36  
37  
38  
39  
40  
41  
42  
43  
44  
45  
46  
47  
48  
49  
50  
51  
52  
53  
54  
55  
56  
57  
58  
59  
60

1  
2  
3  
4 45 **Strengths and limitations of this study**

- 5  
6  
7 46 ● This is the first multi-center, randomized, sham-controlled, and double-blinded  
8  
9  
10 47 phase III trial aimed at verifying the maintenance, improvement effect, and safety  
11  
12  
13 48 of TdES using skin electrodes in patients with retinitis pigmentosa (RP).  
14  
15  
16 49 ● We intend to use a less invasive and easily applicable electrical stimulator with  
17  
18  
19 50 skin electrodes, and no serious adverse events were observed in the phase II  
20  
21  
22 51 study using this device.  
23  
24  
25 52 ● A multi-center (three university hospitals), double-blinded, sham-controlled, and  
26  
27  
28 53 randomized controlled trial is the optimal study design for verifying the  
29  
30  
31 54 effectiveness of TdES.  
32  
33  
34 55 ● Despite fewer patients owing to the rare occurrence of RP, the necessary  
35  
36  
37 56 sample size is estimated to comprise 50 patients based on previous data of the  
38  
39  
40 57 phase II study.  
41

42 58  
43  
44  
45  
46  
47  
48  
49  
50  
51  
52  
53  
54  
55  
56  
57  
58  
59  
60

## 59 INTRODUCTION

60 Spontaneous afferent electrical activity reportedly regulates target cell death  
61 in the developing rat visual system. [1] Short periods of low-frequency electrical  
62 stimulation accelerate the axonal regeneration of peripheral neurons. [2] Morimoto et  
63 al. reported on significantly higher survival rate of rat retinal ganglion cells (RGCs)  
64 following optic nerve transection in rats whose optic nerves were electrically  
65 stimulated than those of the untreated group. [3] Moreover, electrical stimulation  
66 exerted a neuroprotective effect on RGCs, followed by the development of a  
67 transcorneal electrical stimulation (TdES) device that could be used in humans. [4]  
68 Animal models of retinitis pigmentosa (RP), including rats and rabbits, [5-7] and  
69 clinical studies on patients with RP mentioned that TdES can protect retinal  
70 photoreceptors. Moreover, TdES improves the visual acuity, visual fields, and  
71 electroretinograms. [8 9] Previous TdES studies used the contact lens type or  
72 Dawson–Trick–Litzkow fiber-type corneal electrodes, and reported on an association  
73 between TdES sessions and dry eye symptoms. [10] Based on this information, we  
74 previously conducted a phase II clinical trial to evaluate the safety and efficacy of  
75 TdES on the visual function in patients with RP. We used a prototype equipment with  
76 a patch containing an electrode applied to the skin. Electric stimulation was delivered  
77 through the skin, developed jointly with the Mayo Co., Ltd. [11] No adverse events

1  
2  
3  
4 78 were reported during the follow-up examinations, and the mean logarithm of the  
5  
6  
7 79 minimum angle of resolution (logMAR), Early Treatment Diabetic Retinopathy Study  
8  
9  
10 80 (ETDRS) visual acuity, and the mean deviation of the Humphrey field analyzer (HFA)  
11  
12  
13 81 10-2 significantly improved post-TdES. Therefore, we planned a prospective, multi-  
14  
15  
16 82 center, randomized, double-blinded, and sham-controlled phase III clinical trial to  
17  
18  
19 83 compare the maintenance, improvement effect, and safety of TdES using skin  
20  
21  
22 84 electrodes between patients with RP and the sham group. The trial protocol was  
23  
24  
25 85 approved in May 2021 by the Pharmaceuticals and Medical Devices Agency  
26  
27  
28 86 (PMDA), Japan, and the trial was initiated in June 2021. Approval was obtained from  
29  
30  
31 87 the institutional review board (IRB) prior to patient recruitment at each institution.  
32  
33  
34 88

## 37 89 **METHODS AND ANALYSIS**

### 40 90 **Objectives**

41  
42  
43 91 We aimed to verify the long-term efficacy and safety of transdermal electrical  
44  
45  
46 92 stimulation with a skin electrode as a novel treatment for patients with RP.  
47  
48  
49 93 Furthermore, we intended to investigate the long-term course and safety following  
50  
51  
52 94 the discontinuation of TdES.  
53  
54

### 55 95 **Trial design**

56  
57  
58 96 We proposed a prospective, multi-center, randomized, double-blinded, and  
59  
60



1  
2  
3  
4 97 sham-controlled phase III clinical trial. The original protocol and informed consent  
5  
6  
7 98 forms written in Japanese are provided in the online supplementary appendices 1  
8  
9  
10 99 and 2, and this protocol meets the criteria of the Standard Protocol Items:  
11  
12  
13 100 Recommendations for Interventional Trials 2013 statement. The trial was conceived  
14  
15  
16 101 and initiated at the Chiba University Hospital and will be conducted across three  
17  
18  
19 102 institutions (Chiba University Hospital, Kobe University Hospital, and Nagoya City  
20  
21  
22 103 University Hospital) in Japan. A local principal investigator, supported by other staff  
23  
24  
25 104 members, such as a research nurse or clinical research coordinator, conducted the  
26  
27  
28 105 study at the Kobe and Nagoya City University Hospital. Patients were randomly  
29  
30  
31 106 assigned to receive either TdES (intervention) or sham (control), immediately before  
32  
33  
34 107 treatment.

35  
36  
37 108 Figure 1 illustrates the study design. This study consists of three periods,  
38  
39  
40 109 namely pre-observation, treatment, and post-observation. After obtaining informed  
41  
42  
43 110 consent, patients were randomly assigned 1: 1 to the TdES and sham groups. The  
44  
45  
46 111 permissible range for the pre-observation period is 4 weeks. TdES will be performed  
47  
48  
49 112 12 times. The primary and secondary endpoints will be evaluated at week 24. In  
50  
51  
52 113 contrast, the exploratory endpoints will be evaluated at weeks 36 and 48. Table 1  
53  
54  
55 114 lists all schedules for each period to be performed in this study.

56  
57 115  
58  
59  
60



1  
2  
3  
4 118 **Abbreviations:** TdES, transdermal electrical stimulation; VA, visual acuity; ETDRS,  
5  
6  
7 119 Early Treatment Diabetic Retinopathy Study; HFA, Humphrey field analyzer; OCT,  
8  
9  
10 120 optical coherence tomography; NEI VFQ-25, 25-item National Eye Institute Visual  
11  
12  
13 121 Function Questionnaire; IOP: intraocular pressure; and fds: fundus examination.  
14  
15

16 122

### 19 123 **Primary endpoint**

21  
22 124 The primary endpoint comprises the superiority of the logMAR visual acuity  
23  
24  
25 125 in the change from baseline at week 24 in the TdES group, compared to the sham  
26  
27  
28 126 group.  
29

### 31 127 **Secondary endpoints**

33  
34 128 The secondary endpoints include a comparison of the TdES and sham  
35  
36  
37 129 groups at week 24 for the logMAR visual acuity, ETDRS visual acuity, the mean  
38  
39  
40 130 deviation (MD) value of HFA 10-2, monocular Humphrey Esterman visual field test  
41  
42  
43 131 score, ellipsoid zone length, central foveal thickness, and the 25-item National Eye  
44  
45  
46 132 Institute Visual Function Questionnaire (NEI VFQ-25) score.  
47  
48

### 49 133 **Exploratory endpoints**

51  
52 134 The exploratory endpoints comprised a comparison of the TdES and sham  
53  
54  
55 135 groups at weeks 36 and 48 for items of the secondary endpoints.  
56  
57

### 58 136 **Safety endpoints**

1  
2  
3  
4 137 We intend to evaluate the number and rate of adverse events while  
5  
6  
7 138 analyzing the safety endpoints. In addition to the evaluation of possible keratitis,  
8  
9  
10 139 dermatitis, anterior segment, optic media, and fundus, we will determine the effects  
11  
12  
13 140 on the facial and trigeminal nerves during the scheduled visit. Moreover, the patients  
14  
15  
16 141 will undergo safety assessment by optical coherence tomography (OCT).  
17  
18

19 142 **Outcome measures**  
20  
21

22 143 The best-corrected visual acuity (BCVA) was measured monocularly using a  
23  
24  
25 144 Japanese standard Landolt ring chart (System Charts SC-2000 Nidek Instruments,  
26  
27  
28 145 Gamagori, Japan) at 3 m. Decimal visual acuities were converted to logMAR units  
29  
30  
31 146 for statistical analyses. Furthermore, we assessed the BCVA using the ETDRS chart  
32  
33  
34 147 (CSV-1000LanC VectorVision, Ohio, USA) at a distance of 2.5 m. The luminance for  
35  
36  
37 148 the tests was 85 cd/m<sup>2</sup>, which is recommended for vision testing by the US National  
38  
39  
40 149 Academy of Sciences. It has been adopted by the FDA as the required testing light  
41  
42  
43 150 level for clinical trials.  
44  
45

46 151 The MD of retinal sensitivity was determined by the HFA III (Model 850; Carl  
47  
48  
49 152 Zeiss Meditec, Inc., Dublin, CA, USA) using the Swedish Interactive Threshold  
50  
51  
52 153 Algorithm Standard 10-2 protocol. We also analyzed monocular Humphrey Esterman  
53  
54  
55 154 visual field test scores. We requested the patients to respond to the Japanese  
56  
57  
58 155 version of the NEI VFQ-25 [12] to evaluate their subjective symptoms and the quality  
59  
60

1  
2  
3  
4 156 of life. The NEI VFQ-25 consists of 25 questions that address 12 aspects of daily  
5  
6  
7 157 living as follows: general health, general vision, near vision, distance vision, driving,  
8  
9  
10 158 peripheral vision, color vision, ocular pain, role limitation, dependency, social  
11  
12  
13 159 function, and mental health. Compo 9 comprehensively evaluates nine aspects  
14  
15  
16 160 (general vision, near vision, distance vision, peripheral vision, color vision, role  
17  
18  
19 161 limitation, dependency, social function, and mental health), and was analyzed in this  
20  
21  
22 162 study.

### 163 **Eligibility criteria**

164 Those who met all of the following inclusion criteria and did not have any  
165 listed exclusion criteria were considered eligible:

### 167 **Inclusion criteria**

- 168 1. Clinically diagnosed with typical RP, with age  $\geq 20$  years and  $\leq 80$  years.
- 169 2. HFA 10-2 performed twice within 6 months with a reliability fixation defect rate  
170  $< 20\%$ , false positive rate  $< 15\%$ , false negative rate  $< 33\%$ , and a difference in the  
171 mean center four points of retinal sensitivity within 5 dB; both values were  $< 30$  dB.
- 172 3. Decimal visual acuity ranging from 0.1 to 0.7.
- 173 4. HFA 10-2 MD values up to -10 dB.
- 174 5. Provided written informed consent with a sufficient understanding of the

1  
2  
3  
4 175 responsibilities of participating in this trial.  
5

6  
7 176 6. Regular hospital visits every 2 weeks for 3 months and follow-up at 36 and 48  
8  
9  
10 177 weeks.

11  
12  
13 178 7. Could adopt appropriate contraceptive measures during the trial period.  
14  
15

16 179

17  
18  
19 180 **Exclusion criteria**

20  
21  
22 181 1. Patients with a history of electrical stimulation treatment for ocular diseases.  
23

24  
25 182 2. Underwent intraocular surgery within 3 months of beginning this trial.  
26

27  
28 183 3. Modified the dose and usage of isopropyl unoprostone, [13] calcium antagonist,  
29  
30  
31 184 and helenien within 31 days before the screening examination.  
32

33  
34 185 4. A history of allergy to mydriatic agents and ophthalmic surface anesthetic.  
35

36  
37 186 5. The presence of ocular diseases, such as vitreous macular traction syndrome,  
38

39  
40 187 macular edema, epiretinal membrane, myopia with posterior staphyloma, diabetic  
41

42  
43 188 retinopathy, the inflammation or infection of accessory visual structures, severe dry  
44

45  
46 189 eye, central retinal vein occlusion, ischemic optic neuropathy, optic nerve disease,  
47

48  
49 190 Emery-Little cataract  $\geq$  grade 3 [14], or posterior capsular opacification.  
50

51  
52 191 6. Without any deterioration in visual acuity, OCT findings, Goldmann perimetry  
53

54  
55 192 findings, and HFA 10-2 visual field sensitivities in last 3 years.  
56

57  
58 193 7. With a pacemaker or defibrillator.  
59  
60

- 1  
2  
3  
4 194 8. With a history of malignant tumor. However, patients without a relapse for more  
5  
6  
7 195 than 5 years can be enrolled.  
8  
9  
10 196 9. With psychosis, dementia, or mental symptoms that could hinder participation.  
11  
12  
13 197 10. With diabetes and poor glycemic control (HbA1c >10.0%)  
14  
15  
16 198 11. With hypertension (systole  $\geq$ 180 mmHg and/or diastole  $\geq$ 110 mmHg) and  
17  
18  
19 199 difficulty in controlling blood pressure by treatment.  
20  
21  
22 200 12. With hepatic or renal dysfunction that meets any of the following criteria during  
23  
24  
25 201 screening: (i) AST, ALT: More than thrice the upper limit of the facility's standard  
26  
27  
28 202 value; (ii) Creatinine: More than 1.5 times the upper limit of the facility's standard  
29  
30  
31 203 value.  
32  
33  
34 204 13. Pregnant, breastfeeding, or planning to get pregnant during the trial period.  
35  
36  
37 205 14. Participating in other clinical trials.  
38  
39  
40 206 15. Under investigational responsibility (shared) judged inappropriate by doctors for  
41  
42  
43 207 participation in this trial.  
44  
45  
46 208  
47  
48

### 209 **Registration and randomization**

51  
52 210 After confirming the fulfillment of the eligibility criteria, patients were  
53  
54  
55 211 randomly assigned to the TdES and sham groups in a 1:1 allocation via a dynamic  
56  
57  
58 212 and centralized randomization procedure, implemented with the DATATRAK  
59  
60

1  
2  
3  
4 213 Electronic Data Capture system (DATATRAK ONE V.14.6.3; [https://](https://secure.datatrak.net)  
5  
6  
7 214 [secure.datatrak.net](https://secure.datatrak.net)). The participants were randomized by the Academic Clinical  
8  
9  
10 215 Research Center of Osaka University Hospital as a neutral third party, and the  
11  
12  
13 216 blinding codes will be retained by the Osaka University, thus effectively guaranteeing  
14  
15  
16 217 the implementation of blinding in clinical trials. An electronic data capture system  
17  
18  
19 218 was used for the registration, randomization, and data collection. The registration  
20  
21  
22 219 and allocation sequences were generated and managed by the Academic Clinical  
23  
24  
25 220 Research Center of Osaka University Hospital. Data collection was managed by the  
26  
27  
28 221 Data Management Office, Clinical Trial Centre of the Chiba University Hospital.  
29  
30  
31 222 The allocation factor is the best-corrected decimal visual acuity ( $>0.3$ ,  $<0.4$ ), based  
32  
33  
34 223 on dynamic allocation method.

## 224 **Treatment methods**

225 TdES group: The patients received TdES every 2 weeks for 12 sessions.  
226 They underwent TdES consisting of 10-ms biphasic pulses at 20 Hz for 30 min. All  
227 patients were simultaneously stimulated bilaterally with 1.0 mA at the Chiba  
228 University Hospital by physicians. Electrical pulses were obtained from a prototype  
229 equipment jointly developed by Mayo Co., Ltd. (Aichi, Japan). While one electrode  
230 was placed on the lower eyelid lateral to the midline of both eyes, the other was  
231 placed at the center of the forehead in a similar way as in our previous study. [11]



1  
2  
3  
4 232 Sham treatment group: The electrodes were attached in place similar to the  
5  
6  
7 233 TdES group; however, they were passed for 30 min without electrical stimulation.  
8  
9

#### 10 234 **Post-observation period**

11  
12  
13 235 Following TdES, all patients entered the post-observation period. They will  
14  
15  
16 236 be admitted at 36 and 48 weeks and evaluated for the applicable items and safety  
17  
18  
19 237 (Table 1).  
20  
21

#### 22 238 **Criteria for the discontinuation of trial treatment**

23  
24  
25 239 The defined criteria for the discontinuation of trial treatment are as follows:  
26  
27

- 28 240 1) Offer to decline participation in the clinical trial or consent withdrawal.  
29  
30  
31 241 2) Found ineligible after enrollment.  
32  
33  
34 242 3) Difficult to continue the clinical trial because of an exacerbation of complications.  
35  
36  
37 243 4) Difficult to continue the clinical trial owing to adverse events.  
38  
39  
40 244 5) Pregnancy.  
41  
42  
43 245 6) If the entire clinical trial is discontinued.  
44  
45  
46 246 7) Other serious violations of the trial protocol.  
47  
48  
49 247 8) Other situations, judged by the PI, in which TdES cannot be continued.  
50  
51

#### 52 248 **Data management, monitoring, safety, and auditing**

53  
54  
55 249 The monitors will ensure the following aspects:  
56  
57

58 250 # The investigational team complied with the study protocol based on Good Clinical  
59  
60

1  
2  
3  
4 251 Practice (GCP) standards.  
5

6  
7 252 # The data, results, and adverse events (AEs) have been appropriately and  
8

9  
10 253 accurately recorded in the electronic case report forms.  
11

12  
13 254 # Severe AEs are reported to the trial coordinator and the treatment device provider  
14

15  
16 255 (Mayo Co., Ltd), and patients meeting the aforementioned criteria have been  
17

18  
19 256 reported to the IRB.  
20

21  
22 257 The classification of AEs is determined according to the Medical Dictionary  
23

24  
25 258 for Regulatory Activities, Japanese translation MedDRA/J V.22.1 (MedDRA  
26

27  
28 259 Japanese Maintenance Organization, Tokyo, Japan). All participants with AEs were  
29

30  
31 260 followed up until they resolved the AE or for 4 weeks after the end of the trial. All  
32

33  
34 261 severe AEs were reported to the investigators, discussed through an AE reporting  
35

36  
37 262 system on the web, and reported to the Pharmaceuticals and Medical Devices  
38

39  
40 263 Agency (PMDA) (as required). All patients will be recruited into a clinical trial  
41

42  
43 264 insurance provided by the Mitsui Sumitomo Insurance Co., Ltd. for a compensation  
44

45  
46 265 to those who suffer harm from trial participation.  
47

#### 48 49 266 **Data monitoring committee** 50

51  
52 267 The data monitoring committee comprises three clinical trial specialists,  
53

54  
55 268 including a biostatistician, an ophthalmology specialist, and an otolaryngology  
56

57  
58 269 specialist who were not included in this study. This committee will meet twice a year  
59

1  
2  
3  
4 270 and will check all data obtained from this trial.  
5  
6

7 271 **Statistical analysis plan**  
8  
9

10 272 We will perform statistical analyses and reporting of this trial in accordance  
11  
12  
13 273 with the Consolidated Standards of Reporting Trials statement guidelines. All  
14  
15  
16 274 efficacy analyses will be primarily based on the complete analysis set, including all  
17  
18  
19 275 patients who received at least one stimulation of the trial treatment. For the primary  
20  
21  
22 276 analysis aimed at comparing the effects, we will estimate a change in logMAR from  
23  
24  
25 277 the baseline to 24 weeks and its 95% CI using the analysis of covariance, adjusted  
26  
27  
28 278 for the allocation factor at the registration period. A similar method was applied to the  
29  
30  
31 279 secondary efficacy of the change score. The frequency of AEs and 95% CI were  
32  
33  
34 280 estimated using the Clopper-Pearson exact confidence interval. All comparisons  
35  
36  
37 281 were planned, and all p-values were two-sided. The statistical significance has been  
38  
39  
40 282 set at  $P < 0.05$ . All statistical analyses will be performed using SAS software (version  
41  
42  
43 283 9.4; SAS, Cary, North Carolina, USA).  
44  
45

46 284 **Missing values**  
47  
48

49 285 In principle, the missing values are not supplemented. Upon supplementing  
50  
51  
52 286 as necessary, we made the following considerations:  
53  
54

55 287 Consider conducting an analysis using a mixed-effects model repeated  
56  
57  
58 288 measures for missing values because of discontinuation or the omission of efficacy  
59  
60

1  
2  
3  
4 289 evaluation items.  
5  
6

7 290 In the sensitivity analysis, the stability of the result was confirmed by analyzing  
8  
9  
10 291 the observing case (OC), last observation carried forward (LOCF), and multiple  
11  
12  
13 292 imputation (MI). However, the Markov chain Monte Carlo method was used in the MI  
14  
15  
16 293 analysis, and the number of utterances was set to 100. The supplementary method  
17  
18  
19 294 and the results of the sensitivity analysis are reported in the analysis report.  
20  
21

### 22 295 **Sample size estimation**

23  
24  
25 296 The primary objective of the present study was to compare the change in  
26  
27  
28 297 logMAR visual acuity between the treatment and sham groups from week 0 to week  
29  
30  
31 298 24. The null hypothesis was that there would be no significant between-group  
32  
33  
34 299 differences in the change in logMAR visual acuity. The results of our previous study  
35  
36  
37 300 (Study No. K29001) demonstrated an improvement in the logMAR visual acuity.  
38  
39  
40 301 Therefore, we assume the mean and standard deviation of the 24-week change from  
41  
42  
43 302 baseline to be 0.1 logMAR and 0.124 logMAR visual acuity, respectively. In contrast,  
44  
45  
46 303 the placebo effect of the sham group was 1.6 characters (0.032 logMAR visual  
47  
48  
49 304 acuity), as reported in a 2-year-long clinical trial of neovascular age-related macular  
50  
51  
52 305 degeneration. [15] The placebo effect of the sham group was presumably linear with  
53  
54  
55 306 time, and that during evaluation (week 24) of the primary endpoint was assumed to  
56  
57  
58 307 be -0.008 logMAR visual acuity. Therefore, the difference in the TdES and sham  
59  
60

1  
2  
3  
4 308 groups from the baseline was 0.1 log MAR and -0.008 log MAR, respectively.  
5  
6  
7 309 Moreover, the common standard deviation of the groups was 0.124 log MAR.  
8  
9  
10 310 Therefore, we calculated the sample size according to the expected change in the  
11  
12  
13 311 logMAR visual acuity from week 0 to week 24 in the treatment and sham groups (0.1  
14  
15  
16 312 and -0.008, respectively) (SD=0.124). Based on these assumptions, the required  
17  
18  
19 313 sample size was 22 patients per group (2-sided,  $\alpha=.05$ ,  $\beta=.8$ , t-test). Considering a  
20  
21  
22 314 10% dropout rate, we targeted 25 patients per group. Therefore, the target sample  
23  
24  
25 315 size for the randomized trial was 50.

#### 316 **Interim analysis and monitoring**

317 No interim analysis has been planned.

#### 318 **Patient and public involvement**

319 The patients and general public were not involved in the trial design.

#### 320 **ETHICS AND DISSEMINATION**

321 We intend to publish results of this ePICO trial in a major journal.

322

#### 323 **DISCUSSION**

324 Previous studies have reported on improved visual function of eyes with  
325 traumatic and ischemic optic neuropathy, [16] retinal artery occlusion, [17 18] dry  
326 age-related macular dystrophy, [19 20] glaucoma, [21] Leber hereditary optic

1  
2  
3  
4 327 neuropathy [22], and RP following TdES with corneal electrodes.  
5  
6

7 328 The previously conducted phase II clinical trial demonstrated no adverse  
8  
9  
10 329 events caused by electrical stimulation. In addition, the mean BCVA and MD of HFA  
11  
12  
13 330 10-2 significantly improved after TdES. Currently, there are no approved electrical  
14  
15  
16 331 stimulation devices for ocular diseases in Japan. We planned this trial to approve  
17  
18  
19 332 ocular electrical stimulation therapy devices for patients with RP.  
20  
21

22 333 The electrodes of the treatment device used in this trial do not touch the  
23  
24  
25 334 corneal or conjunctival surface, thus preventing dry eye symptoms previously  
26  
27  
28 335 reported using transcorneal electrodes. [10] Moreover, no serious adverse events  
29  
30  
31 336 were observed in the phase II study. [11] Therefore, our treatment device using skin  
32  
33  
34 337 electrodes has the advantage of being an easier and safer option than one that uses  
35  
36  
37 338 corneal electrodes.  
38  
39

40 339 In the previous phase II clinical trial, the sample size was as small as 10 and  
41  
42  
43 340 the treatment period was as short as 12 weeks. In addition, we did not set a follow-  
44  
45  
46 341 up period, thus could not evaluate the safety and efficacy post-treatment. Therefore,  
47  
48  
49 342 we decided to set the target number of patients to 50 and the treatment period to 24  
50  
51  
52 343 weeks. We also set the post-observation period to 36 weeks and 48 weeks to  
53  
54  
55 344 acquire data post-treatment.  
56  
57

58 345 This trial has several strengths, in addition to larger sample size and longer  
59  
60

1  
2  
3  
4 346 treatment duration. This is the first randomized, double-blinded, and sham-controlled  
5  
6  
7 347 clinical trial of TdES in patients with RP. It is the first step in the clinical application of  
8  
9  
10 348 electrical stimulation therapy for other ocular diseases effectively treated by electrical  
11  
12  
13 349 stimulation. Simultaneously, we are conducting a clinical trial of TdES for central  
14  
15  
16 350 retinal artery occlusion (UMIN000036219) and non-arteritic ischemic optic  
17  
18  
19 351 neuropathy (UMIN000036220) using a similar treatment device. We intend to apply  
20  
21  
22 352 the findings as a set with the results of the aforementioned and current ePICO trial  
23  
24  
25 353 for an approval of the TdES device.

26  
27  
28 354 A limitation of this trial is the small target patient size. This can be attributed  
29  
30  
31 355 to the rare occurrence of RP. However, the necessary sample size was estimated to  
32  
33  
34 356 be 50 based on previous data of the phase II study, and this protocol was approved  
35  
36  
37 357 with regulatory strategy consultation of the PMDA.

38  
39  
40 358 In summary, an easier and less invasive treatment method will likely become  
41  
42  
43 359 widespread in patients with RP after confirming the efficacy of TdES in this trial.

44  
45 360  
46  
47  
48  
49  
50  
51  
52  
53  
54  
55  
56  
57  
58  
59  
60

## 361 **Acknowledgements**

362 We would like to thank all staff and patients involved in the study at the three  
363 research sites and the Trial Steering Committee and Data Monitoring Committee for  
364 their ongoing support throughout the trial. We would like to acknowledge the role of  
365 the Clinical Research Centre, Chiba University Hospital, in supporting the ongoing  
366 delivery of the trial at the sites.

367 We also thank Masao Yoshikawa, Daigo Yoshikawa, and Hidetaka Kudo of the Mayo  
368 Company for providing the treatment device and technical help.

369 We would like to thank Editage (<http://www.editage.jp>) for English language editing.

## 370 **Author Contributions**

371 All authors made a significant contribution to the conception and design of the trial  
372 protocol. G.M. was the first author and wrote this manuscript. G.M. made a major  
373 contribution to the design of this trial and the development of the original trial  
374 protocol. Y.O., Y.S., and Y.K. developed the statistical analysis plan. All authors  
375 have reviewed and approved the final manuscript.

## 376 **Funding**

377 This study was supported by the Japan Agency for Medical Research and  
378 Development (AMED) under grant number 21hk0102072h0002.



1  
2  
3  
4 379 This study was also supported by a Therapeutics Research Initiative Grant from the  
5  
6  
7 380 Chiba University School of Medicine 2019-G1.  
8  
9

10 381 **Competing Interests**

11  
12  
13 382 GM: grants from Novartis outside the submitted work. TB: personal fees from Bayer,  
14  
15  
16 383 Kowa, Santen, Senju, and Alcon, and grants and personal fees from Novartis,  
17  
18  
19 384 outside the submitted work. SY: grants and personal fees from HOYA, Senju, Pfizer,  
20  
21  
22 385 Santen, Alcon Japan, Alcon Pharma, Bayer, and Kowa, personal fees from Nikon,  
23  
24  
25 386 Wakamoto, Chuo Sangyo, Daiichi Sankyo, Jamex, Sun Contact Lens, Finedex,  
26  
27  
28 387 Novartis, Chugai, and Abbvie, outside the submitted work. HH: personal fees from  
29  
30  
31 388 Torii Yakuhin, outside the submitted work. YO, YS, YK, TI, and TF declare no  
32  
33  
34 389 competing interests associated with this manuscript. Mayo Co., Ltd. had no role in  
35  
36  
37 390 the study design, data collection, data analysis, data interpretation, or writing of the  
38  
39  
40 391 protocol.  
41  
42

43 392 **Patient consent for publication**

44  
45  
46 393 Obtained.  
47  
48

49 394 **Ethics approval**

50  
51  
52 395 The IRB of all three institutions has approved the trial.  
53  
54  
55 396 This trial will be conducted in accordance with the Ordinance on the Standards for  
56  
57  
58 397 the Implementation of Clinical Trials (GCP Ordinance) and the principles of the  
59  
60

1  
2  
3  
4 398 Declaration of Helsinki of the World Medical Association. All participants will receive  
5  
6  
7 399 adequate information about the purpose, nature, benefits, and possible risks of this  
8  
9  
10 400 trial, and alternative therapeutic choices by investigator, using an informed consent  
11  
12  
13 401 form approved by the IRB at the Chiba University Hospital and two other institutions.  
14  
15  
16 402 Participant-signed informed consent forms were required to be enrolled in this trial.  
17

18  
19 403 **ORCID ID**

20  
21  
22 404 Gen Miura <http://orcid.org/0000-0001-6288-8840>  
23  
24

25 405

26  
27  
28 406 **References**

- 29  
30  
31 407 1. Galli-Resta L, Ensini M, Fusco E, et al. Afferent spontaneous electrical activity  
32  
33  
34 408 promotes the survival of target cells in the developing retinotectal system of the  
35  
36  
37 409 rat. *J Neurosci* 1993;**13**(1):243-50. doi: 10.1523/jneurosci.13-01-00243.1993  
38  
39  
40 410 [published Online First: 1993/01/01]  
41  
42  
43 411 2. Al-Majed AA, Neumann CM, Brushart TM, et al. Brief electrical stimulation promotes  
44  
45  
46 412 the speed and accuracy of motor axonal regeneration. *J Neurosci*  
47  
48  
49 413 2000;**20**(7):2602-8. doi: 10.1523/jneurosci.20-07-02602.2000 [published Online  
50  
51  
52 414 First: 2000/03/24]  
53  
54  
55 415 3. Morimoto T, Miyoshi T, Fujikado T, et al. Electrical stimulation enhances the survival  
56  
57  
58 416 of axotomized retinal ganglion cells in vivo. *Neuroreport* 2002;**13**(2):227-30.  
59  
60

- 1  
2  
3  
4 417 doi: 10.1097/00001756-200202110-00011 [published Online First: 2002/03/15]  
5  
6  
7 418 4. Morimoto T, Miyoshi T, Matsuda S, et al. Transcorneal electrical stimulation rescues  
8  
9  
10 419 axotomized retinal ganglion cells by activating endogenous retinal IGF-1  
11  
12  
13 420 system. *Investigative ophthalmology & visual science* 2005;**46**(6):2147-55. doi:  
14  
15  
16 421 10.1167/iovs.04-1339 [published Online First: 2005/05/26]  
17  
18  
19 422 5. Morimoto T, Fujikado T, Choi JS, et al. Transcorneal electrical stimulation promotes  
20  
21  
22 423 the survival of photoreceptors and preserves retinal function in royal college of  
23  
24  
25 424 surgeons rats. *Investigative ophthalmology & visual science* 2007;**48**(10):4725-  
26  
27  
28 425 32. doi: 10.1167/iovs.06-1404 [published Online First: 2007/09/28]  
29  
30  
31 426 6. Morimoto T, Kanda H, Kondo M, et al. Transcorneal electrical stimulation promotes  
32  
33  
34 427 survival of photoreceptors and improves retinal function in rhodopsin P347L  
35  
36  
37 428 transgenic rabbits. *Investigative ophthalmology & visual science*  
38  
39  
40 429 2012;**53**(7):4254-61. doi: 10.1167/iovs.11-9067 [published Online First:  
41  
42  
43 430 2012/05/19]  
44  
45  
46 431 7. Yu H, Enayati S, Chang K, et al. Noninvasive Electrical Stimulation Improves  
47  
48  
49 432 Photoreceptor Survival and Retinal Function in Mice with Inherited  
50  
51  
52 433 Photoreceptor Degeneration. *Investigative ophthalmology & visual science*  
53  
54  
55 434 2020;**61**(4):5. doi: 10.1167/iovs.61.4.5 [published Online First: 2020/04/10]  
56  
57  
58 435 8. Schatz A, Röck T, Naycheva L, et al. Transcorneal electrical stimulation for patients  
59  
60

- 1  
2  
3  
4 436 with retinitis pigmentosa: a prospective, randomized, sham-controlled  
5  
6  
7 437 exploratory study. *Investigative ophthalmology & visual science*  
8  
9  
10 438 2011;**52**(7):4485-96. doi: 10.1167/iovs.10-6932 [published Online First:  
11  
12  
13 439 2011/04/07]
- 16 440 9. Bittner AK, Seger K, Salveson R, et al. Randomized controlled trial of electro-  
17  
18  
19 441 stimulation therapies to modulate retinal blood flow and visual function in  
20  
21  
22 442 retinitis pigmentosa. *Acta ophthalmologica* 2018;**96**(3):e366-e76. doi:  
23  
24  
25 443 10.1111/aos.13581 [published Online First: 2017/11/14]
- 28 444 10. Schatz A, Pach J, Gosheva M, et al. Transcorneal Electrical Stimulation for  
29  
30  
31 445 Patients With Retinitis Pigmentosa: A Prospective, Randomized, Sham-  
32  
33  
34 446 Controlled Follow-up Study Over 1 Year. *Investigative ophthalmology & visual*  
35  
36  
37 447 *science* 2017;**58**(1):257-69. doi: 10.1167/iovs.16-19906 [published Online First:  
38  
39  
40 448 2017/01/24]
- 43 449 11. Miura G, Sugawara T, Kawasaki Y, et al. Clinical Trial to Evaluate Safety and  
44  
45  
46 450 Efficacy of Transdermal Electrical Stimulation on Visual Functions of Patients  
47  
48  
49 451 with Retinitis Pigmentosa. *Scientific reports* 2019;**9**(1):11668. doi:  
50  
51  
52 452 10.1038/s41598-019-48158-5 [published Online First: 2019/08/14]
- 55 453 12. Suzukamo Y, Oshika T, Yuzawa M, et al. Psychometric properties of the 25-item  
56  
57  
58 454 National Eye Institute Visual Function Questionnaire (NEI VFQ-25), Japanese

- 1  
2  
3  
4 455 version. *Health Qual Life Outcomes* 2005;**3**:65. doi: 10.1186/1477-7525-3-65  
5  
6  
7 456 [published Online First: 2005/10/27]  
8  
9  
10 457 13. Yamamoto S, Sugawara T, Murakami A, et al. Topical isopropyl unoprostone for  
11  
12  
13 458 retinitis pigmentosa: microperimetric results of the phase 2 clinical study.  
14  
15  
16 459 *Ophthalmology and therapy* 2012;**1**(1):5-5. doi: 10.1007/s40123-012-0005-9  
17  
18  
19 460 [published Online First: 2012/09/06]  
20  
21  
22 461 14. Emery JM, Little JH. *Phacoemulsification and aspiration of cataracts : surgical*  
23  
24  
25 462 *techniques, complications, and results*: Mosby 1979.  
26  
27  
28 463 15. Rosenfeld PJ, Brown DM, Heier JS, et al. Ranibizumab for neovascular age-  
29  
30  
31 464 related macular degeneration. *N Engl J Med* 2006;**355**(14):1419-31. doi:  
32  
33  
34 465 10.1056/NEJMoa054481 [published Online First: 2006/10/06]  
35  
36  
37 466 16. Fujikado T, Morimoto T, Matsushita K, et al. Effect of transcorneal electrical  
38  
39  
40 467 stimulation in patients with nonarteritic ischemic optic neuropathy or traumatic  
41  
42  
43 468 optic neuropathy. *Japanese journal of ophthalmology* 2006;**50**(3):266-73. doi:  
44  
45  
46 469 10.1007/s10384-005-0304-y [published Online First: 2006/06/13]  
47  
48  
49 470 17. Inomata K, Shinoda K, Ohde H, et al. Transcorneal electrical stimulation of retina  
50  
51  
52 471 to treat longstanding retinal artery occlusion. *Graefe's archive for clinical and*  
53  
54  
55 472 *experimental ophthalmology = Albrecht von Graefes Archiv fur klinische und*  
56  
57  
58 473 *experimentelle Ophthalmologie* 2007;**245**(12):1773-80. doi: 10.1007/s00417-  
59  
60

- 1  
2  
3  
4 474 007-0610-9 [published Online First: 2007/06/27]  
5  
6  
7 475 18. Oono S, Kurimoto T, Kashimoto R, et al. Transcorneal electrical stimulation  
8  
9  
10 476 improves visual function in eyes with branch retinal artery occlusion. *Clinical*  
11  
12  
13 477 *ophthalmology (Auckland, NZ)* 2011;**5**:397-402. doi: 10.2147/opth.S17751  
14  
15  
16 478 [published Online First: 2011/04/19]  
17  
18  
19 479 19. Shinoda K, Imamura Y, Matsuda S, et al. Transcutaneous electrical retinal  
20  
21  
22 480 stimulation therapy for age-related macular degeneration. *Open Ophthalmol J*  
23  
24  
25 481 2008;**2**:132-6. doi: 10.2174/1874364100802010132 [published Online First:  
26  
27  
28 482 2008/01/01]  
29  
30  
31 483 20. Chaikin L, Kashiwa K, Bennet M, et al. Microcurrent stimulation in the treatment of  
32  
33  
34 484 dry and wet macular degeneration. *Clinical ophthalmology (Auckland, NZ)*  
35  
36  
37 485 2015;**9**:2345-53. doi: 10.2147/opth.S92296 [published Online First: 2016/01/01]  
38  
39  
40 486 21. Ota Y, Ozeki N, Yuki K, et al. The Efficacy of Transcorneal Electrical Stimulation  
41  
42  
43 487 for the Treatment of Primary Open-angle Glaucoma: A Pilot Study. *Keio J Med*  
44  
45  
46 488 2018;**67**(3):45-53. doi: 10.2302/kjm.2017-0015-OA [published Online First:  
47  
48  
49 489 2018/02/09]  
50  
51  
52 490 22. Kurimoto T, Ueda K, Mori S, et al. A Single-Arm, Prospective, Exploratory Study  
53  
54  
55 491 to Preliminarily Test Effectiveness and Safety of Skin Electrical Stimulation for  
56  
57  
58 492 Leber Hereditary Optic Neuropathy. *J Clin Med* 2020;**9**(5) doi:  
59  
60

1  
2  
3  
4  
5  
6  
7  
8  
9  
10  
11  
12  
13  
14  
15  
16  
17  
18  
19  
20  
21  
22  
23  
24  
25  
26  
27  
28  
29  
30  
31  
32  
33  
34  
35  
36  
37  
38  
39  
40  
41  
42  
43  
44  
45  
46  
47  
48  
49  
50  
51  
52  
53  
54  
55  
56  
57  
58  
59  
60

493  
494  
495

10.3390/jcm9051359 [published Online First: 2020/05/10]

For peer review only

1  
2  
3  
4 496 **Figure legend**

5  
6  
7 497 **Figure 1. Trial design**

8  
9  
10 498 TdES: Transdermal electrical stimulation.  
11  
12  
13  
14  
15  
16  
17  
18  
19  
20  
21  
22  
23  
24  
25  
26  
27  
28  
29  
30  
31  
32  
33  
34  
35  
36  
37  
38  
39  
40  
41  
42  
43  
44  
45  
46  
47  
48  
49  
50  
51  
52  
53  
54  
55  
56  
57  
58  
59  
60

For peer review only



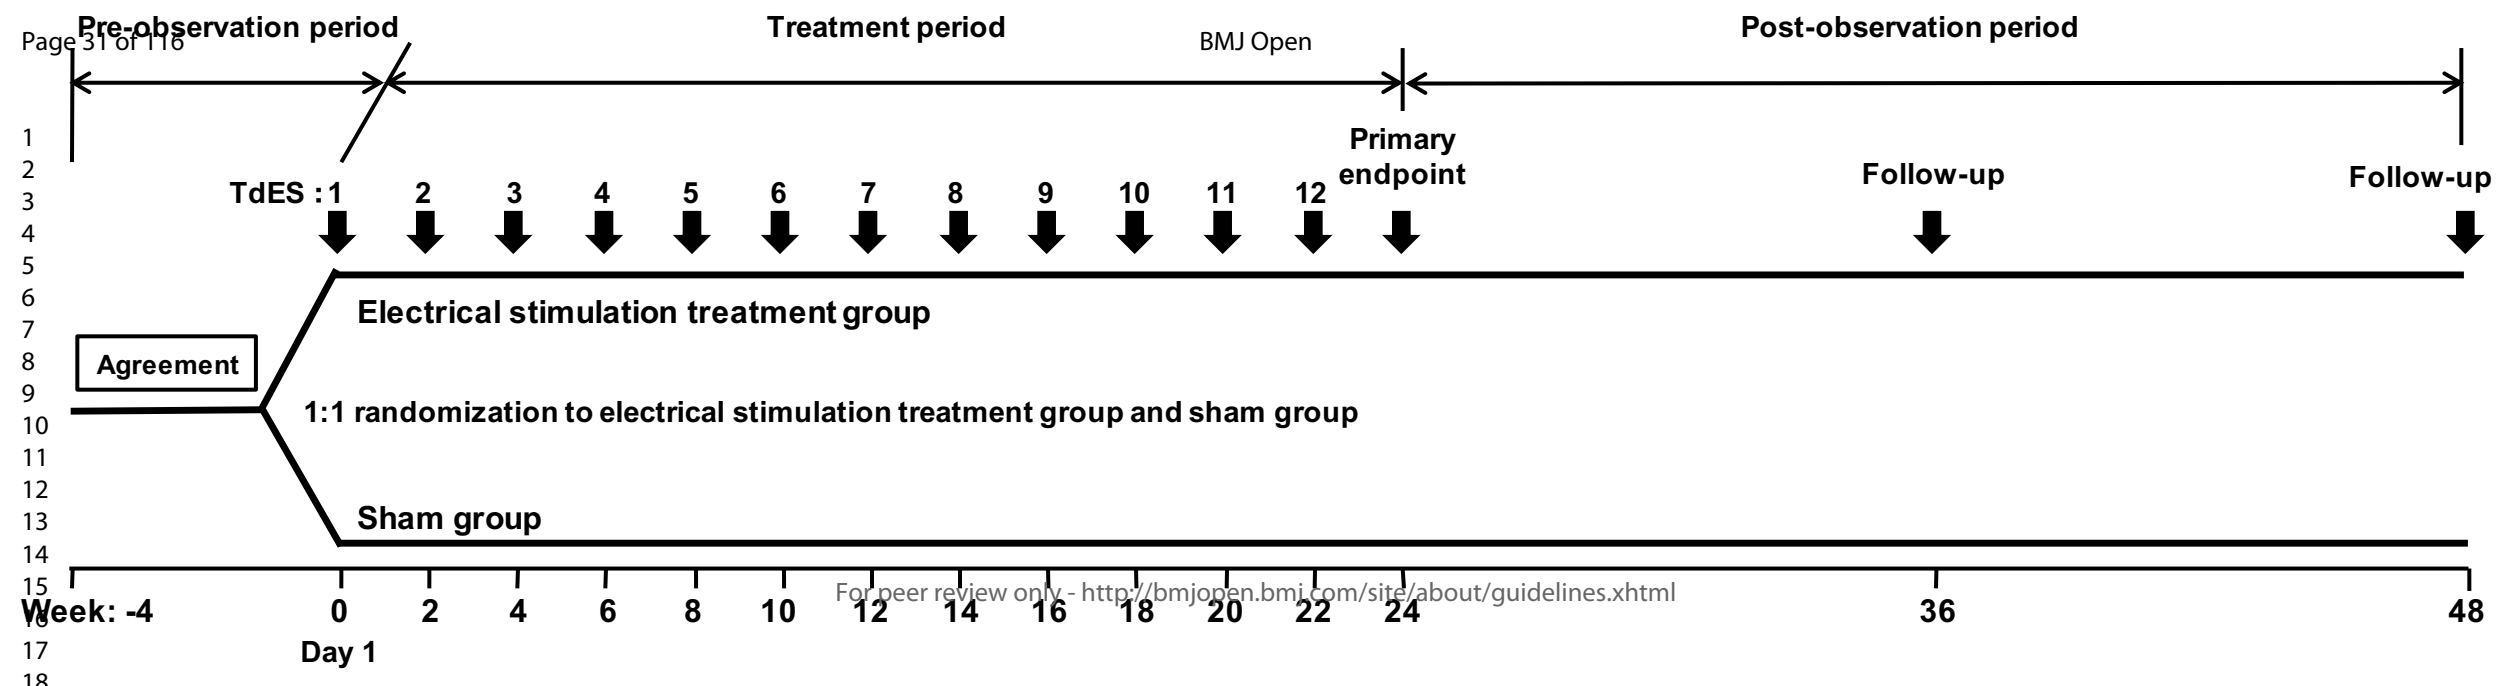

# 治験実施計画書

## 網膜色素変性を対象とした経皮膚電気刺激装置の有効性及び安全性を検証するシャム対照二重遮蔽比較試験

版数 2.1 版  
作成日 2021 年 5 月 25 日

### 改訂履歴

| 作成日             | 版数    |
|-----------------|-------|
| 2021 年 4 月 1 日  | 1.0 版 |
| 2021 年 5 月 10 日 | 2.0 版 |
| 2021 年 5 月 25 日 | 2.1 版 |

治験実施計画書番号 CCRC1804

### 機密情報に関する注意

本治験実施計画書は機密情報であり、本治験に参加する治験責任医師、治験分担医師、治験協力者、実施医療機関、治験審査委員会、データモニタリング委員会に対して提供されるものです。よって、被験者に説明する場合を除き、治験責任医師及び治験機器提供者である有限会社メイヨーの文書による同意なしに、いかなる第三者にも開示し、又は本治験の目的以外に利用することはできません。また、本治験の結果の一部又は全部を学会、雑誌等外部に発表する場合には、治験責任医師及び有限会社メイヨーの承諾が必要となりますので、あらかじめ、治験調整医師までご連絡頂きますようお願いいたします。

## &lt;目次&gt;

|                                   |    |
|-----------------------------------|----|
| 0. 治験の概要 .....                    | 8  |
| 1. 緒言 .....                       | 12 |
| 1.1. 治験の背景 .....                  | 12 |
| 1.2. 網膜色素変性に対する標準治療 .....         | 13 |
| 1.3. 治験機器の概要 .....                | 13 |
| 1.3.1. 使用方法 .....                 | 13 |
| 1.3.2. 非臨床成績 .....                | 14 |
| 1.3.3. 臨床試験成績 .....               | 14 |
| 1.3.3.1. 国内臨床成績 .....             | 14 |
| 1.3.3.2. 海外臨床試験成績 .....           | 14 |
| 1.3.4. 予想される有害事象及び不具合等 .....      | 15 |
| 2. 治験の目的と治験実施の妥当性 .....           | 15 |
| 2.1. 目的 .....                     | 15 |
| 2.2. 本治験実施の妥当性 .....              | 15 |
| 3. 対象患者 .....                     | 15 |
| 3.1. 選択基準 .....                   | 15 |
| 3.2. 除外基準 .....                   | 16 |
| 4. 被験者の同意 .....                   | 18 |
| 4.1. 同意文書及びその他の説明文書の作成並びに改訂 ..... | 18 |
| 4.2. 同意取得の時期と方法 .....             | 18 |
| 4.3. 被験者に対する説明事項 .....            | 19 |
| 5. 治験の方法 .....                    | 20 |
| 5.1. 治験のデザイン .....                | 20 |
| 5.2. 目標被験者数と治験実施期間 .....          | 21 |
| 5.3. 施設登録 .....                   | 21 |
| 5.3.1. 施設登録 .....                 | 21 |
| 5.3.2. 施設登録先 .....                | 21 |
| 5.4. 症例登録 .....                   | 21 |
| 5.4.1. 症例登録・割付 .....              | 21 |
| 5.4.2. 症例登録先 .....                | 22 |
| 5.4.3. 割付調整因子 .....               | 22 |
| 5.4.4. 割付情報の管理 .....              | 22 |
| 5.5. 遮蔽化 .....                    | 22 |
| 5.6. コードの開鍵 .....                 | 22 |
| 5.7. 緊急コード開封の手続き .....            | 22 |

|    |                                  |    |
|----|----------------------------------|----|
| 1  |                                  |    |
| 2  |                                  |    |
| 3  |                                  |    |
| 4  | 5.8. 登録されなかった被験者の取り扱い .....      | 22 |
| 5  | 5.9. 個々の症例の中止基準 .....            | 23 |
| 6  |                                  |    |
| 7  | 5.10. 併用可能薬及び併用可能療法 .....        | 23 |
| 8  |                                  |    |
| 9  | 5.11. 併用禁止薬及び併用禁止療法 .....        | 23 |
| 10 | 5.12. 併用制限薬 .....                | 23 |
| 11 |                                  |    |
| 12 | 5.13. 治験中止後の対応 .....             | 23 |
| 13 | 6. 治験機器 .....                    | 24 |
| 14 |                                  |    |
| 15 | 6.1. 外観及び構成 .....                | 24 |
| 16 |                                  |    |
| 17 | 6.2. 安全装置 .....                  | 25 |
| 18 |                                  |    |
| 19 | 6.3. 作動原理 .....                  | 25 |
| 20 |                                  |    |
| 21 | 6.4. 品質 .....                    | 25 |
| 22 | 6.4.1. 安全性 .....                 | 26 |
| 23 | 6.4.2. 性能 .....                  | 26 |
| 24 | 6.4.3. 製造 .....                  | 26 |
| 25 |                                  |    |
| 26 | 6.5. 包装・表示 .....                 | 27 |
| 27 |                                  |    |
| 28 | 6.6. 管理方法 .....                  | 27 |
| 29 | 7. 観察・検査・評価項目、方法及び実施時期 .....     | 28 |
| 30 |                                  |    |
| 31 | 7.1. 実施スケジュールと手順 .....           | 28 |
| 32 | 7.1.1. スクリーニング検査 .....           | 30 |
| 33 | 7.1.2. 被験者の情報 .....              | 31 |
| 34 | 7.1.3. 観察・検査・評価項目 .....          | 31 |
| 35 |                                  |    |
| 36 | 8. 有害事象発生時の取り扱い .....            | 35 |
| 37 |                                  |    |
| 38 | 8.1. 有害事象、不具合及び機器関連有害事象の定義 ..... | 35 |
| 39 | 8.2. 有害事象又は不具合発生時の被験者への対応 .....  | 35 |
| 40 | 8.3. 報告の対象となる有害事象及び不具合 .....     | 35 |
| 41 | 8.4. 有害事象及び不具合発生時の報告手順 .....     | 35 |
| 42 | 8.5. 有害事象及び不具合の評価に必要な記載内容 .....  | 35 |
| 43 |                                  |    |
| 44 | 8.5.1. 有害事象 .....                | 35 |
| 45 | 8.5.2. 不具合 .....                 | 36 |
| 46 | 8.5.3. 有害事象の回復性と治験機器との因果関係 ..... | 36 |
| 47 | 8.5.3.1. 治験機器との因果関係 .....        | 36 |
| 48 | 8.5.3.2. 治験機器に関する処置 .....        | 36 |
| 49 | 8.5.3.3. 転帰 .....                | 37 |
| 50 | 8.6. 重篤な有害事象発生時の取り扱い .....       | 37 |
| 51 |                                  |    |
| 52 | 8.6.1. 重篤な有害事象の定義 .....          | 37 |
| 53 | 8.6.2. 報告の対象となる重篤な有害事象 .....     | 37 |
| 54 |                                  |    |
| 55 |                                  |    |
| 56 |                                  |    |
| 57 |                                  |    |
| 58 |                                  |    |
| 59 |                                  |    |
| 60 |                                  |    |

|    |                                                |    |
|----|------------------------------------------------|----|
| 1  |                                                |    |
| 2  |                                                |    |
| 3  |                                                |    |
| 4  | 8.6.3. 重篤な有害事象等の報告手順 .....                     | 38 |
| 5  | 9. 評価項目 .....                                  | 39 |
| 6  | 9.1. 主要評価項目 .....                              | 39 |
| 7  | 9.2. 副次評価項目 .....                              | 39 |
| 8  | 9.3. 探索的評価項目 .....                             | 39 |
| 9  | 9.4. 安全性評価項目 .....                             | 40 |
| 10 | 10. 統計学的事項 .....                               | 40 |
| 11 | 10.1. 解析対象集団 .....                             | 41 |
| 12 | 10.1.1. 安全性解析対象集団 .....                        | 41 |
| 13 | 10.1.2. 最大の解析対象集団 .....                        | 41 |
| 14 | 10.1.3. 治験実施計画書に適合した対象集団 .....                 | 41 |
| 15 | 10.2. 目標症例数と設定根拠 .....                         | 41 |
| 16 | 10.3. 症例の取り扱い .....                            | 41 |
| 17 | 10.4. データの取り扱い .....                           | 42 |
| 18 | 10.5. 統計解析項目及び解析計画 .....                       | 42 |
| 19 | 10.5.1. 被験者背景の解析 .....                         | 42 |
| 20 | 10.5.2. 安全性及び有効性の解析 .....                      | 43 |
| 21 | 10.5.2.1. 主たる解析 .....                          | 43 |
| 22 | 10.5.2.2. 副次解析 .....                           | 43 |
| 23 | 10.5.2.3. 探索的解析 .....                          | 43 |
| 24 | 10.5.3. 安全性の解析 .....                           | 43 |
| 25 | 10.6. データモニタリング委員会 .....                       | 43 |
| 26 | 10.7. 最終解析 .....                               | 43 |
| 27 | 11. 治験実施計画書の遵守及び逸脱 .....                       | 43 |
| 28 | 12. 治験実施計画書、症例報告書又は解析計画に関する変更 .....            | 44 |
| 29 | 12.1. 治験実施計画書及び症例報告書の改訂 .....                  | 44 |
| 30 | 12.2. 統計解析計画の変更 .....                          | 44 |
| 31 | 13. 治験の中止、中断又は終了 .....                         | 44 |
| 32 | 13.1. 治験全体での中止又は中断の基準 .....                    | 44 |
| 33 | 13.2. 治験全体での中止又は中断する場合の手続き .....               | 44 |
| 34 | 13.3. 個々の実施医療機関での治験の中止又は中断する場合の手続き .....       | 45 |
| 35 | 13.4. 治験の終了 .....                              | 45 |
| 36 | 14. データマネジメント .....                            | 45 |
| 37 | 14.1. データマネジメントの手順 .....                       | 45 |
| 38 | 14.2. データの収集 .....                             | 45 |
| 39 | 14.3. 症例報告書に直接記入され、かつ原資料（原データ）と解すべき資料の特定 ..... | 45 |
| 40 |                                                |    |
| 41 |                                                |    |
| 42 |                                                |    |
| 43 |                                                |    |
| 44 |                                                |    |
| 45 |                                                |    |
| 46 |                                                |    |
| 47 |                                                |    |
| 48 |                                                |    |
| 49 |                                                |    |
| 50 |                                                |    |
| 51 |                                                |    |
| 52 |                                                |    |
| 53 |                                                |    |
| 54 |                                                |    |
| 55 |                                                |    |
| 56 |                                                |    |
| 57 |                                                |    |
| 58 |                                                |    |
| 59 |                                                |    |
| 60 |                                                |    |

|    |                                         |    |
|----|-----------------------------------------|----|
| 1  |                                         |    |
| 2  |                                         |    |
| 3  |                                         |    |
| 4  | 15. 記録の保存 .....                         | 46 |
| 5  | 15.1. 実施医療機関による記録の保存 .....              | 46 |
| 6  | 15.2. 治験責任医師による記録の保存 .....              | 46 |
| 7  |                                         |    |
| 8  | 16. 原資料の直接閲覧 .....                      | 46 |
| 9  |                                         |    |
| 10 | 17. 治験の品質管理及び品質保証 .....                 | 46 |
| 11 | 17.1. 品質管理 .....                        | 46 |
| 12 | 17.2. 品質保証 .....                        | 47 |
| 13 |                                         |    |
| 14 | 18. 倫理及び GCP .....                      | 47 |
| 15 |                                         |    |
| 16 | 19. 治験審査委員会 .....                       | 47 |
| 17 |                                         |    |
| 18 | 20. 健康被害補償及び保険 .....                    | 47 |
| 19 | 21. 治験に関する費用負担 .....                    | 48 |
| 20 | 22. 研究資金及び利益相反 .....                    | 48 |
| 21 | 23. 治験のデータベース登録 .....                   | 48 |
| 22 | 24. 付録 .....                            | 48 |
| 23 |                                         |    |
| 24 | 25. 治験実施体制 .....                        | 48 |
| 25 |                                         |    |
| 26 | 26. SARS-CoV-2 流行時における治験手順の一時的な変更 ..... | 48 |
| 27 |                                         |    |
| 28 | 27. 参考資料・文献リスト .....                    | 49 |
| 29 |                                         |    |
| 30 |                                         |    |
| 31 |                                         |    |
| 32 |                                         |    |
| 33 |                                         |    |
| 34 |                                         |    |
| 35 |                                         |    |
| 36 |                                         |    |
| 37 |                                         |    |
| 38 |                                         |    |
| 39 |                                         |    |
| 40 |                                         |    |
| 41 |                                         |    |
| 42 |                                         |    |
| 43 |                                         |    |
| 44 |                                         |    |
| 45 |                                         |    |
| 46 |                                         |    |
| 47 |                                         |    |
| 48 |                                         |    |
| 49 |                                         |    |
| 50 |                                         |    |
| 51 |                                         |    |
| 52 |                                         |    |
| 53 |                                         |    |
| 54 |                                         |    |
| 55 |                                         |    |
| 56 |                                         |    |
| 57 |                                         |    |
| 58 |                                         |    |
| 59 |                                         |    |
| 60 |                                         |    |

1  
2  
3  
4  
5  
6  
7  
8  
9  
10  
11  
12  
13  
14  
15  
16  
17  
18  
19  
20  
21  
22  
23  
24  
25  
26  
27  
28  
29  
30  
31  
32  
33  
34  
35  
36  
37  
38  
39  
40  
41  
42  
43  
44  
45  
46  
47  
48  
49  
50  
51  
52  
53  
54  
55  
56  
57  
58  
59  
60

<略語・用語集>

本治験実施計画書における略語・略記・用語の定義を以下に示す。

| 略号・略記・用語 | 定義                                         |                       |
|----------|--------------------------------------------|-----------------------|
| AC       | alternating current                        | 交流電流                  |
| Ag/AgCl  | silver/silver chloride                     | 銀/塩化銀                 |
| ALT      | alanine aminotransferase                   | アラニンアミノ基転移酵素 (GPT)    |
| ALP      | alkaline phosphatase                       | アルカリホスファターゼ           |
| AST      | aspartate aminotransferase                 | アスパラギン酸アミノ基転移酵素 (GOT) |
| BDNF     | brain-derived neurotrophic factor          | 脳由来神経栄養因子             |
| BRAO     | branch retinal artery occlusion            | 網膜動脈分枝閉塞症             |
| BUN      | blood urea nitrogen                        | 尿素窒素                  |
| CNTF     | ciliary neurotrophic factor                | 毛様体神経栄養因子             |
| COX-2    | cyclooxygenase-2                           | シクロオキシゲナーゼ-2          |
| CRC      | clinical research coordinator              | 治験コーディネーター            |
| CRP      | C-reactive protein                         | C反応性蛋白                |
| dB       | decibel                                    | デシベル                  |
| DC       | direct current                             | 直流電流                  |
| ERG      | electroretinogram                          | 網膜電図                  |
| ETDRS    | early treatment diabetic retinopathy study | 早期糖尿病網膜症治療調査          |
| EZ       | ellipsoid zone                             | エリプソイドゾーン             |
| FAS      | full analysis set                          | 最大の解析対象集団             |
| FGF1     | fibroblast growth factor                   | 線維芽細胞増殖因子 1           |
| GOT      | glutamic oxaloacetic transaminase          | グルタミン酸オキサロ酢酸トランスアミナーゼ |
| GP       | goldmann perimetry                         | ゴールドマン視野計             |
| GPT      | glutamic-pyruvic transaminase              | グルタミン酸ピルビン酸トランスアミナーゼ  |
| HbA1c    | hemoglobin A1c                             | 糖化ヘモグロビン              |
| HFA      | humphrey field analyzer                    | ハンフリー視野計              |
| Hz       | hertz                                      | ヘルツ                   |

|            |                                                                  |                               |
|------------|------------------------------------------------------------------|-------------------------------|
| IGF-1      | insulin-like growth factors                                      | インスリン様成長因子-1                  |
| IL-1b      | interleukin-1b                                                   | サイトカイン(インターロイキン-1 ベータ)        |
| IL-6       | interleukin-6                                                    | サイトカイン (インターロイキン-6)           |
| IL-10      | interleukin-10                                                   | サイトカイン (インターロイキン-10)          |
| IS/OS      | photoreceptor inner/outersegment junction                        | 視細胞内節外節接合部                    |
| LLT        | lowest level terms                                               | 下層語                           |
| mA         | milliampere                                                      | ミリアンペア                        |
| MD         | mean deviation                                                   | 平均偏差                          |
| MedDRA/J   | medical dictionary for regulatory activities/ Japanese           | 医薬品規制調和国際会議 (ICH) 国際医薬用語集日本語版 |
| mmHg       | millimeter Hg                                                    | ミリメートル水銀柱                     |
| msec       | milli second                                                     | ミリ秒                           |
| NGSP       | national glycohemoglobin standardization program                 | 全米グリコヘモグロビン標準化プログラム           |
| NF-κB      | nuclear factor kappa-light-chain-enhancer of activated B cells   | 核内因子 κB                       |
| NEI VFQ 25 | the 25-item national eye institute visual function questionnaire | 米国国立眼病研究所 25 項目視覚機能質問票        |
| OCT        | optical coherence tomography                                     | 光干渉断層計                        |
| PMDA       | pharmaceuticals and medical devices agency                       | 独立行政法人 医薬品医療機器総合機構            |
| PPS        | per protocol set                                                 | 治験実施計画書に適合した対象集団              |
| PT         | preferred terms                                                  | 基本語                           |
| RP         | retinitis pigmentosa                                             | 網膜色素変性                        |
| SOC        | system organ class                                               | 器官別大分類                        |
| TdES       | transdermal electrical stimulation                               | 経皮膚電気刺激                       |
| TES        | trancorneal electrical stimulation                               | 経角膜電気刺激                       |
| TNF-α      | tumor necrosis factor-α                                          | 腫瘍壊死因子                        |
| UMIN       | university hospital medical information network                  | 大学病院医療情報ネットワーク                |
| VFQ        | visual function quetionnaire                                     | 視機能質問票                        |



## 0. 治験の概要

|        |                                                                                                                                                                                                                                                                                                                                                                                                                                                                                                                                                                                                                                                                                       |
|--------|---------------------------------------------------------------------------------------------------------------------------------------------------------------------------------------------------------------------------------------------------------------------------------------------------------------------------------------------------------------------------------------------------------------------------------------------------------------------------------------------------------------------------------------------------------------------------------------------------------------------------------------------------------------------------------------|
| 治験課題名  | 網膜色素変性を対象とした経皮膚電気刺激装置の有効性及び安全性を検証するシヤム対照二重遮蔽比較試験                                                                                                                                                                                                                                                                                                                                                                                                                                                                                                                                                                                                                                      |
| 治験の目的  | 網膜色素変性患者に対する、皮膚電極を用いた経皮膚電気刺激による視機能の維持・改善効果及び安全性をシヤム群と比較し検証すること。                                                                                                                                                                                                                                                                                                                                                                                                                                                                                                                                                                                                                       |
| 治験デザイン | ランダム化、二重遮蔽、シヤム対照、多施設共同、検証的                                                                                                                                                                                                                                                                                                                                                                                                                                                                                                                                                                                                                                                            |
| 被験機器   | <p>1) 概要<br/>電気刺激用皮膚電極を両眼の下眼瞼耳側及び前額部の中央の皮膚に装着し、各種条件下である一定の電気刺激を与え、網膜及び視神経疾患等を対象として治療を行うための機器である。</p> <p>2) 構成<br/>「電気刺激装置」、「皮膚電極」とそれらを繋ぐ「電極接続ケーブル」から構成されている。</p> <p>3) 仕様</p> <p>(1) 電気刺激装置</p> <ul style="list-style-type: none"> <li>・ 電流値 : 0~2,000 <math>\mu</math> A</li> <li>・ 刺激頻度 : 20 Hz</li> <li>・ 出力波形 : 正負両相</li> <li>・ パルス幅 : 各相 10 msec</li> </ul> <p>(2) 皮膚電極 (積水化成工業 (株))</p> <ul style="list-style-type: none"> <li>・ 大きさ : 19×38 mm のディスプレイ電極</li> <li>・ 電極素子 : Ag/AgCl</li> <li>・ 基材 : 不織布</li> <li>・ ゲル : 導電性粘着ゲル</li> </ul> <p>(3) 電気容量</p> <p>AC アダプタ定格 (入力) AC 100V 50/60 Hz 30 VA<br/>AC アダプタ定格 (出力) DC 5V 4 A</p> <p>(4) 重量 : 約 300 g、寸法 : 140×100×69 mm</p> |
| 選択基準   | <p>以下のすべての条件に該当する患者を対象とする。ただし、2)~4) に関しては評価眼に関して、以下の基準を満たすこと。</p> <ol style="list-style-type: none"> <li>1) 同意取得時の年齢が 20 歳以上 80 歳未満の定型網膜色素変性患者。</li> <li>2) 信頼性 (固視不良率 20% 未満、偽陽性率 15% 未満、偽陰性率 33% 未満) のある静的視野検査 (HFA) 10-2 プログラムの計測値を示す患者。</li> <li>3) 小数視力が 0.1~0.7 の患者。</li> <li>4) 静的視野検査 (HFA) 10-2 プログラム MD (Mean Deviation : MD) 値が -10 dB 未満の患者。</li> <li>5) 本治験の参加にあたり十分な説明を受けた後、十分な理解のうえ、本人の自由意思による文書同意が得られた患者。</li> <li>6) 2 週おきに 24 週間の通院が可能でかつ、36 週及び 48 週の後観察の通院が可能な患者。</li> <li>7) 治験期間中に適切な避妊措置を実施することが可能な患者。</li> </ol>                                                                                                                                              |

|      |                                                                                                                                                                                                                                                                                                                                                                                                                                                                                                                                                                                                                                                                                                                                                                                                                                                                                                                                                                                                                                                                                                                                                                                                                                                                 |
|------|-----------------------------------------------------------------------------------------------------------------------------------------------------------------------------------------------------------------------------------------------------------------------------------------------------------------------------------------------------------------------------------------------------------------------------------------------------------------------------------------------------------------------------------------------------------------------------------------------------------------------------------------------------------------------------------------------------------------------------------------------------------------------------------------------------------------------------------------------------------------------------------------------------------------------------------------------------------------------------------------------------------------------------------------------------------------------------------------------------------------------------------------------------------------------------------------------------------------------------------------------------------------|
| 除外基準 | <p>以下のいずれかの条件に該当する患者は対象としない。ただし、2), 5), 6)に関しては評価眼に関して以下のいずれかの条件に該当する患者は対象としないこと。</p> <ol style="list-style-type: none"> <li>1) 過去に眼疾患に対する電気刺激治療を受けたことのある患者。</li> <li>2) 3ヶ月以内に内眼部手術を受けている患者。</li> <li>3) スクリーニング前 31 日以内にイソプロピルウノプロストン・カルシウム拮抗薬・暗順応改善薬の用量・用法を変更した患者。</li> <li>4) 治験期間中に使用する予定の薬剤（散瞳薬、点眼麻酔薬等）に対し、薬剤アレルギーの既往のある患者。</li> <li>5) 評価眼の視機能に重大な影響を及ぼす合併症を有する患者：硝子体黄斑牽引症候群、黄斑浮腫、黄斑前膜、後部ぶどう腫を伴う強度近視などの黄斑病変、糖尿病網膜症、外眼部の炎症、感染症、重度のドライアイ、網膜中心動脈閉塞症、後部虚血性視神経症、視神経疾患の既往、中等度以上の核白内障、視力に重大な影響を及ぼす前囊下及び後囊下白内障、後発白内障。</li> <li>6) 直近3年間の視力、OCT 所見、視野検査での視野感度のいずれも全く悪化が見られない患者。ただし、組み入れ時の参考資料として他院のデータを使用可とする。</li> <li>7) ペースメーカーもしくは除細動器が植え込まれている患者。</li> <li>8) 悪性腫瘍の既往又は合併のある患者。ただし、既往はあるが5年以上再発していない患者は登録可とする。</li> <li>9) 認知症、精神疾患と診断され治療中の患者。</li> <li>10) 血糖コントロールが著しく不良な糖尿病（HbA1c(NGSP) &gt; 10.0%）を合併している患者。</li> <li>11) 内服治療をしてもコントロール困難な高血圧症（収縮期 <math>\geq 180</math> mmHg、かつ／又は、拡張期 <math>\geq 110</math> mmHg）の患者。</li> <li>12) スクリーニング時の臨床検査で、下記のいずれかに該当する肝・腎機能障害が認められる患者。 <ul style="list-style-type: none"> <li>・ AST、ALT：（施設）基準値上限の3倍超</li> <li>・ 血清クレアチニン：（施設）基準値上限の1.5倍超</li> </ul> </li> <li>13) 妊娠、授乳中（授乳を中止する場合も含む）又は本治験中に妊娠を希望している患者。</li> <li>14) 現在、他の治験に参加している患者。</li> <li>15) その他、治験責任医師又は治験分担医師が本治験の参加の対象として不相当と判断した患者。</li> </ol> |
| 評価項目 | <p>&lt;主要評価項目&gt;：評価眼</p> <p>24 週時における logMAR 視力（矯正小数視力から換算）の 0 週からの変化量における電気刺激群のシャム群に対する優越性</p> <p>&lt;副次評価項目&gt;：評価眼</p> <p>24 週の下記測定項目における電気刺激群とシャム群の比較</p> <ol style="list-style-type: none"> <li>1) logMAR 視力</li> <li>2) ETDRS チャートを用いた ETDRS 視力</li> </ol>                                                                                                                                                                                                                                                                                                                                                                                                                                                                                                                                                                                                                                                                                                                                                                                                                                                                                                                                                                                               |

|      |                                                                                                                                                                                                                                                                                                                                                                                                                                                                                                                                                                                                                                                                                                                                                                                                                    |
|------|--------------------------------------------------------------------------------------------------------------------------------------------------------------------------------------------------------------------------------------------------------------------------------------------------------------------------------------------------------------------------------------------------------------------------------------------------------------------------------------------------------------------------------------------------------------------------------------------------------------------------------------------------------------------------------------------------------------------------------------------------------------------------------------------------------------------|
|      | <p>3) 静的視野検査 (HFA) : 10-2 プログラム MD 値の網膜感度</p> <p>4) 静的視野検査 (HFA) : エスターマンテスト (100 点) スコア</p> <p>5) 光干渉断層計 (OCT) : 黄斑部エリプソイドゾーン長</p> <p>6) 光干渉断層計 (OCT) : 中心窩網膜厚</p> <p>7) logMAR 視力下面積</p> <p>8) NEI VFQ-25 コンポ 9</p> <p>&lt;探索的評価項目&gt; : 評価眼</p> <p>36 週及び 48 週の下記測定項目における電気刺激群とシヤム群の比較</p> <p>➤ 36 週時点</p> <p>1) logMAR 視力</p> <p>2) ETDRS チャートを用いた ETDRS 視力</p> <p>3) 光干渉断層計 (OCT) : 黄斑部エリプソイドゾーン長</p> <p>4) 光干渉断層計 (OCT) : 中心窩網膜厚</p> <p>➤ 48 週時点</p> <p>1) logMAR 視力</p> <p>2) ETDRS チャートを用いた ETDRS 視力</p> <p>3) 静的視野検査 (HFA) : 10-2 プログラム MD 値の網膜感度</p> <p>4) 静的視野検査 (HFA) : エスターマンテスト (100 点) スコア</p> <p>5) 光干渉断層計 (OCT) : 黄斑部エリプソイドゾーン長</p> <p>6) 光干渉断層計 (OCT) : 中心窩網膜厚</p> <p>&lt;安全性評価項目&gt;</p> <p>1) 有害事象の発現状況 (種類、頻度及び重症度等)</p> <p>2) 自覚症状他覚所見</p> <p>3) 光干渉断層計 (OCT) による安全性評価 (電気刺激の網膜への安全性も含む)</p> |
| 治験方法 | <p>1) 本治験は、前観察期間、評価期間及び後観察期間から成る。<br/>(詳細は、「7.1 実施スケジュールと手順」を参照する。)</p> <p>2) 登録・割付完了後、治療を開始する。</p> <p>3) 評価期間は 24 週間とし、皮膚電極を用いた経皮膚電気刺激治療を 2 週おきに 12 回施行する。本治療時の刺激条件は以下のとおりとする。</p> <p>&lt;刺激条件&gt;</p> <p>➤ 電気刺激群</p> <ul style="list-style-type: none"> <li>・電流強度 : 1.0 mA</li> <li>・パルス幅 : 10 ms/相 双極性</li> <li>・刺激頻度 : 20 Hz</li> <li>・刺激時間 : 30 分</li> </ul> <p>➤ シヤム群</p> <ul style="list-style-type: none"> <li>・電流強度 : 0 mA</li> <li>・パルス幅 : 0 ms/相 双極性</li> <li>・刺激頻度 : 0 Hz</li> <li>・刺激時間 : 30 分</li> </ul>                                                                                                                                                                                                                                                                                             |

|          |                                                                                                                                                                                                                                                                                                                                      |
|----------|--------------------------------------------------------------------------------------------------------------------------------------------------------------------------------------------------------------------------------------------------------------------------------------------------------------------------------------|
| 中止基準     | <ol style="list-style-type: none"> <li>1) 被験者から治験参加辞退の申し出や同意撤回があった場合。</li> <li>2) 治験登録後、被験者が対象として不適格であることが判明した場合。</li> <li>3) 合併症の増悪により治験の継続が困難な場合。</li> <li>4) 有害事象により治験の継続が困難な場合。</li> <li>5) 妊娠が判明した場合。</li> <li>6) 治験全体が中止された場合。</li> <li>7) その他の重大な治験実施計画書違反が判明した場合。</li> <li>8) 治験担当医師又は治験分担医師の判断により中止の必要性が認められた場合。</li> </ol> |
| 目標被験者数   | 50 例（電気刺激群 25 例、シヤム群 25 例）                                                                                                                                                                                                                                                                                                           |
| 治験実施期間   | 治験実施期間：1 年 10 ヶ月（2021 年 6 月 1 日～2023 年 3 月 31 日）<br>症例登録期間：10 ヶ月（2021 年 6 月 1 日～2022 年 3 月 31 日）                                                                                                                                                                                                                                     |
| 治験施設数    | 3 施設                                                                                                                                                                                                                                                                                                                                 |
| 倫理及び GCP | 本治験の実施に際しては「ヘルシンキ宣言」に基づく倫理的原則、「医薬品、医療機器等の品質、有効性及び安全性の確保等に関する法律（以下、「薬機法」という。）」、「医療機器の臨床試験の実施の基準に関する省令（以下、「医療機器 GCP 省令」という。）」及びその他の関連する規制要件を遵守するものとする。                                                                                                                                                                                 |
| 治験審査委員会  | 本治験の実施に先立ち、実施医療機関の治験審査委員会は、本治験の倫理的、科学的及び医学的妥当性を審査する。本治験は、治験審査委員会の承認を得た後に実施する。治験審査委員会の審議結果が「修正の上で承認する」であった場合には、審議結果に基づいて実施計画書又は症例報告書、同意説明文書等を修正した後、本治験を実施する。また、治験審査委員会は少なくとも 1 年に 1 回以上の頻度で本治験が適切に実施されているか否かを継続的に審査する。                                                                                                                |

## 1. 緒言

### 1.1. 治験の背景

網膜色素変性（以下、「RP」という。）は、視細胞及び網膜色素上皮細胞を原発とした進行性の広範な変性がみられる遺伝性の疾患群と定義され、多くは初期に杆体の変性が現れる。進行すると視細胞の錐体細胞にも変性がおよび、視力低下をきたし、やがて失明に至る。病型により異なるが、すべて両眼性進行性で、早いものでは40代に社会的失明状態になる。先天盲の第1位であり、2015年4月から2016年3月までに新規に視覚障害認定を受けた18歳以上の認定原因疾患のうち、1位の緑内障（28.6%）に次いで2位（14.0%）となっている。遺伝子異常によって起こり、多くは単一遺伝子疾患であり、関連する遺伝子が現在80種以上報告されている。常染色体優性（15~17%）、常染色体劣性（25~30%）、X連鎖性（0.5~1.6%）のいずれかの遺伝形式をとるが、家系内に他の発症者が確認できない孤発例（49~56%）が最多となっている。2015年1月1日より国が定める指定難病の一つに認定されている。発症頻度はわが国においては約4,000~8,000人に一人と推定されており、2016年の医療受給者証保持者数厚生労働省患者調査では26,245人と報告されている。

RP患者は健常者に比べて高い頻度で白内障や後発白内障、前嚢収縮、黄斑病変（黄斑浮腫、黄斑上膜、黄斑円孔）を合併し、それぞれの疾患に対して加療が行われるが、現時点ではRPに対する有効な治療法は無く、治療法の確立は非常に重要な問題である。

電気刺激は網膜神経節細胞に対して神経保護効果があることが基礎研究により報告<sup>1,2,3</sup>されている。網膜電気刺激を行うことによって、網膜内層におけるIGF-1の活性上昇<sup>4</sup>、BDNF（脳由来神経栄養因子）の発現増加<sup>5</sup>、CNTF（毛様体神経栄養因子）発現増加<sup>6</sup>、FGF1の発現増加<sup>7</sup>、IL-1b及びTNF- $\alpha$ の抑制<sup>8</sup>、Bax遺伝子のダウンレギュレーション<sup>6</sup>、グルタミン合成酵素分泌増加<sup>9</sup>、細胞内アデノシン1リン酸レベルの増加<sup>2</sup>、細胞シグナル伝達・代謝・構造・免疫学的因子関連タンパク質のアップレギュレーション<sup>10</sup>、IL-10発現増加に伴うIL-6・COX-2発現減少<sup>11</sup>、NF- $\kappa$ Bリン酸化減少<sup>11</sup>、小膠細胞由来のTNF- $\alpha$ 産生抑制<sup>12</sup>、脈絡膜血流増加<sup>13</sup>等、様々な機序によって網膜神経保護及び機能活性化を生じると報告されている。また臨床試験においても、網膜動脈閉塞患者に対して網膜電気刺激を行うことによって視力、網膜電図振幅、視野の改善を認めたとの報告が存在する<sup>14,15</sup>。ことから、皮膚電極を用いた経皮膚電気刺激治療はRPにより視力低下が進行している患者に対して視力の改善が期待される。

海外では既に小型のポータブル型の器械が商品化され、主に欧州ではRPや加齢黄斑変性等の網膜疾患を対象として、コンタクトレンズ型角膜電極を用いた電気刺激装置である“OkuStim<sup>®</sup>”が臨床に用いられているものの、国内では商品化されていない。また、TESの“OkuStim<sup>®</sup>”は、角膜上に電極を設置して電気刺激を行うため、操作は簡便ではあるが、ドライアイの有害事象が報告<sup>15</sup>され、電気刺激による角膜障害の危険性が指摘されている。それに対して、本研究で用いる電気刺激治療は、電極を皮膚に設置することで、角膜電極と比較しより低侵襲に、より簡便に電気刺激を行うことが出来ると考える。

千葉大学医学部附属病院眼科において、RP患者10例20眼を対象に2週間隔で6回の両頬と額に設置する皮膚電極を用いた経皮膚電気刺激（以下、「TdES」という。）治療を実施した「網膜色素変性を対象とした経皮膚電気刺激の安全性および有効性を検討する探索的試験（第II相試験）（試験番号K29001）」において、重篤な有害事象の発現及び不具合等の発生はなかった。有害事象が4例（感冒4例、下痢1例、発熱1例）に発現したが、治験機器との因果関係は認められなかった。一方、有効性の検討においては、ETDRS視力が6週、10週及び12週時において0週時に比べ統計学的に有意な改善を示し、12週時

では平均で約 4 文字の改善を認めた。logMAR 視力においても 8 週時以降、0 週時に比べ統計学的に有意な改善を示した。静的視野検査での Mean Deviation 値（以下、「MD 値」という。）は改善傾向であり、12 週時において、0 週時との統計学的な有意差を認めた。

以上より、TdES によって logMAR 視力、ETDRS 視力、静的視野検査での MD 値が改善し、視力の低下を遅延させる可能性があることが示唆された。

さらに、第Ⅱ相試験被験者の長期に亘る過去データを採集し、視機能障害の進行速度及び過去データと治療効果との因果関係を調査する目的に、「網膜色素変性を対象とした経皮膚電気刺激の安全性および有効性を検討する探索的試験被験者の試験前データについての後向き研究」を実施した。その結果、logMAR 視力について最も有意かつ一定の速度で線形的に悪化していることが確認された。このことより、第Ⅱ相試験の選択基準に該当する患者層における視力の推移に関しては、電気刺激治療未介入下では有意かつ一定の速度で進行すると仮定できる。電気刺激治療介入前データを用いて線形回帰モデルで推定した値と、実際に電気刺激治療を行った場合の値との比較検討を行うことで、有効性を検証することが可能となる（この検討については別途附随研究として実施予定）。

本試験においては、24 週時における logMAR 視力（矯正小数視力から換算）の 0 週からの変化量における電気刺激群のシャム群に対する優越性を主要評価項目として、TdES による視機能の維持効果を検証し、シャム群を設定することで試験期間を通しての logMAR 視力の推移を検討する。また、皮膚電極を用いた本治療法は患者に対して侵襲性が低く、経済的にも負担の少ない治療法となる可能性があり、臨床上有用であると考えられることから、皮膚電極を用いた本治療法の開発を検討するに至った。

以上より、RP 患者における第Ⅱ相試験（試験番号 K29001）における有効性及び安全性についてシャム群に対する優越性を検証すること及びプラセボ効果を検討することを目的に、本試験を計画した。

## 1.2. 網膜色素変性に対する標準治療

RP には確立した治療法はない。残存視機能を活用する目的でロービジョンケアが行われる。その他にサプリメントや内服薬による内服治療が行われることがあるがいずれも効果に関しては明確な結論には至っておらず、内服や摂取のメリットとデメリットを患者と十分に相談したうえで使用されるのが望ましいと考えられる。このほか、白内障や黄斑浮腫等の合併症を治療することで視機能改善を見込む治療法もあるが、それらはあくまで合併症への治療にとどまる。

## 1.3. 試験機器の概要

### 1.3.1. 使用方法

電流刺激の強さ（電流量）及び時間（治療時間）をコントロールするほか、治療眼（右眼、左眼、両眼）の選択を行う。本体には、電気刺激で通電する電流の大きさ、通電時間等を表示する。皮膚電極はゲル状の粘着物質がある面を皮膚に接触し、反対の面にある突起に皮膚電極と本体を接続するケーブルを接続する。電極の装着場所は、両眼の下眼瞼耳側及び前額部の中央に装着する。

ゲル状パッドの電極は、家庭向け低周波治療器に使用されるディスクポータブルな電極に類似する。大きさは 19×38 mm 程度で、ゲル状の粘着物質がある面を皮膚に接触し、反対の面にある突起に電極と機器を接続するケーブルを接続し、皮膚を経由して電気刺激が行われる。電極の装着場所は、両眼の下眼瞼耳側及び前額部の中央に装着する（右図）。

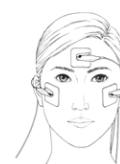

電極装着図

### 1.3.2. 非臨床成績

当該機器に使用する電極パッドが健全な皮膚に接触することから、生物学的安全性について担保が求められる。電極パッドの製造業者である積水化成工業株式会社の生物学的試験データによると、生体用ハイドロゲル（テクノゲル CR・SR<sup>®</sup>）には、生体安全性関連の有害事象はないとされており、心電図用電極、脳波用電極、生体センサー、電気治療器用電極などに使用されている。試験データの概要を以下に記す。

#### 【生物学的試験データ（SRA240/80-09S）】

1) 以下の規格に基づいて生物学的試験が実施された。

| 試験                    | 規格及び試験方法                                                                                                                                |
|-----------------------|-----------------------------------------------------------------------------------------------------------------------------------------|
| 細胞毒性試験                | ISO 10993-5:2009 - 医療機器の生物学的評価 Part 5: 細胞毒性試験: in vitro 法                                                                               |
| 感作性試験                 | ISO 10993-10:2010 - 医療機器の生物学的評価 Part 10: 刺激性及び遅発性過敏性の試験 (section 7.2)<br>ISO 10993-12:2012 - 医療機器の生物学的評価 Part 12: 試料調製及び対象物質            |
| 皮膚一次刺激性試験             | ISO 10993-10:2010 - 医療機器の生物学的評価 Part 10: 刺激性及び遅発性過敏性の試験 (section 6.3)                                                                   |
| 河合法<br>「24 時間開放性塗布試験」 | 被験者 20 名の上腕内側部に試料を 24 時間塗布し、塗布位置を観察する。肉眼的に異常のないものはレプリカ標本を作製し全視野を顕微鏡観察し、刺激性の有無及び強度を判定する。皮膚表面の微細な形態変化（B 刺激、C 刺激）から紅斑のような炎症反応（D 刺激）まで判定する。 |

2) 結果概要（SRA240/80-09S）

| 試験方法                       | 結果                           |
|----------------------------|------------------------------|
| L929 細胞を用いた細胞毒性試験 非接触（寒天）法 | 細胞毒性なし                       |
| マウスを用いた局所リンパ節アッセイ          | 陰性                           |
| ウサギを用いた皮膚 1 次刺激性試験         | P.I.I.=0, 刺激性なし              |
| 河合法「24 時間開放性塗布試験」          | 3B-0C-0D、準陽性とヒトに対する刺激性は極めて弱い |

### 1.3.3. 臨床試験成績

#### 1.3.3.1. 国内臨床成績

緒言に記載しているとおり、千葉大学医学部附属病院眼科において、RP 患者 10 例 20 眼を対象とした「網膜色素変性を対象とした経皮膚電気刺激の安全性および有効性を検討する探索的試験（第 II 相試験）」（試験番号 K29001）が実施されており、安全性及び有効性が示唆されている。

#### 1.3.3.2. 海外臨床試験成績

海外では、ドイツが Okuvision 社製 OkuStim<sup>®</sup>を、アメリカが ScyFix 社製 ScyFix700<sup>®</sup>を電気刺激治療器として販売している。角膜電極を用いた網膜電気刺激に関する文献の要旨を以下に示す。

|                            |                                                                                                                                            |
|----------------------------|--------------------------------------------------------------------------------------------------------------------------------------------|
| Schatz A 他 <sup>14</sup>   | RP24 例に TES 週 1 回 30 分 6 回、安全性及び忍容性に問題なし、有効性：視野と暗順応 b 波が有意に改善。                                                                             |
| Schatz A 他 <sup>15</sup>   | RP52 例、週 1 回 30 分 1 年間、安全性結果：安全性：一過性ドライアイ症状（52 人中 31 人）、他に臨床的に有意な有害事象なし。有効性結果：明順応 b 波が有意に改善、暗順応 b 波振幅が改善傾向。                                |
| Bittner AK 他 <sup>16</sup> | 2.4~3 年にわたり TES を 3~6 回受けた網膜色素変性患者 3 例、安全性：治療と関連ある有害事象なし、有効性：中心視機能の改善を TES 後約 4~7 週間後に繰り返し認め、その後ベースラインに回帰し、かつベースラインを超えて視機能が大幅に低下することはなかった。 |

#### 1.3.4. 予想される有害事象及び不具合等

使用する電流量からは有害事象が発生する可能性は低いと推測されるが、電極装着部位に一致した皮膚炎や角膜障害が生じる可能性がある。また電気刺激による電極装着部位付近の皮膚に刺激感を感じる事が予測される。医療機器の不具合情報に加えて、不適切な使用方法（未熟な手技）による不具合情報も含める。なお、これらの事象は、第Ⅱ相試験（試験番号 K29001）においては発現しなかった。

## 2. 治験の目的と治験実施の妥当性

### 2.1. 目的

網膜色素変性患者に対する、皮膚電極を用いた経皮膚電気刺激による視機能の維持・改善効果及び安全性をシャム群と比較し検証する。

### 2.2. 本治験実施の妥当性

RP には標準治療法がないことから、RP 患者に対する、皮膚電極を用いた経皮膚電気刺激による治療後の視機能への有効性及び安全性を確認することは臨床上必要と考えられる。

## 3. 対象患者

以下の選択基準のすべてを満たし、除外基準のいずれにも該当しない患者を治験登録適格例とする。

### 3.1. 選択基準

以下のすべての条件に該当する患者を対象とする。ただし、2)～4) に関しては評価眼に関して、以下の基準を満たすこと。

- 1) 同意取得時の年齢が 20 歳以上 80 歳未満の定型網膜色素変性患者
- 2) 信頼性（固視不良率 20 % 未満、偽陽性率 15 % 未満、偽陰性率 33 % 未満）のある静的視野検査（HFA）10-2 プログラムの計測値を示す患者
- 3) 小数視力が 0.1～0.7 の患者
- 4) 静的視野検査（HFA）10-2 プログラム MD（Mean Deviation：MD）値が -10 dB 未満の患者
- 5) 本治験の参加にあたり十分な説明を受けた後、十分な理解のうえ、本人の自由意思による文書同意が得られた患者
- 6) 2 週おきに 24 週間の通院が可能でかつ、36 週及び 48 週の後観察の通院が可能な患者
- 7) 治験期間中に適切な避妊措置を実施することが可能な患者

#### 【設定根拠】

RP は両眼進行性の疾患であり、初期は比較的視力が保たれているが、増悪すると失明する。このため、本治験機器の性能が検出可能な、視力が中等度～重度の間の中層の患者を対象とするため。

- 1) 診断基準に基づいて設定した。
- 2, 3, 4) 種々の評価項目が正確に行えるようにするため。
- 5) 「ヘルシンキ宣言」に基づく倫理的原則、薬機法、医療機器 GCP 省令及びその他の関連する規制要件を遵守して治験を実施するため。



6, 7) 本治験を完遂出来ると考えられる患者であり、かつ女性が参画しやすくするため。

### 3.2. 除外基準

以下のいずれかの条件に該当する患者は対象としない。ただし、2), 5), 6)に関しては評価眼に関して以下のいずれかの条件に該当する患者は対象としないこと。

- 1) 過去に眼疾患に対する電気刺激治療を受けたことのある患者
- 2) 3ヶ月以内に内眼部手術を受けている患者
- 3) スクリーニング前31日以内にイソプロピルウノプロストン・カルシウム拮抗薬・暗順応改善薬の用量・用法を変更した患者
- 4) 治験期間中に使用する予定の薬剤（散瞳薬、点眼麻酔薬等）に対し、薬剤アレルギーの既往のある患者
- 5) 評価眼の視機能に重大な影響を及ぼす合併症を有する患者：硝子体黄斑牽引症候群、黄斑浮腫、黄斑前膜、後部ぶどう腫を伴う強度近視などの黄斑病変、糖尿病網膜症、外眼部の炎症、感染症、重度のドライアイ、網膜中心動脈閉塞症、後部虚血性視神経症、視神経疾患の既往、中等度以上の核白内障、視力に重大な影響を及ぼす前囊下及び後囊下白内障、後発白内障
- 6) 直近3年間の視力、OCT所見、視野検査での視野感度のいずれも全く悪化が見られない患者。ただし、組み入れ時の参考資料として他院のデータを使用可とする
- 7) ペースメーカーもしくは除細動器が植え込まれている患者
- 8) 悪性腫瘍の既往又は合併のある患者。ただし、既往はあるが5年以上再発していない患者は登録可とする
- 9) 認知症、精神疾患と診断され治療中の患者
- 10) 血糖コントロールが著しく不良な糖尿病（HbA1c(NGSP) > 10.0%）を合併している患者
- 11) 内服治療をしてもコントロール困難な高血圧症（収縮期 $\geq$ 180 mmHg、かつ/又は、拡張期 $\geq$ 110 mmHg）の患者
- 12) スクリーニング時の臨床検査で、下記のいずれかに該当する肝・腎機能障害が認められる患者
  - ・ AST、ALT：（施設）基準値上限の3倍超
  - ・ 血清クレアチニン：（施設）基準値上限の1.5倍超
- 13) 妊娠、授乳中（授乳を中止する場合も含む）又は本治験中に妊娠を希望している患者
- 14) 現在、他の治験に参加している患者
- 15) その他、治験責任医師又は治験分担医師が本治験の参加の対象として不適当と判断した患者

#### 【設定根拠】

- 4, 7, 8, 9, 10, 11, 12, 13) 対象患者の安全性を考慮するため。
- 4) 被験者にアナフラキシーショック等のアレルギー反応が起こる危険性を排除するため。
- 7) 電気刺激装置から発生する微弱電流が体内に植え込まれているペースメーカーもしくは除細動器の作動を狂わせ被験者の健康に悪影響を与える可能性があるため。
- 8) 悪性腫瘍の既往又は合併のある患者は再発に対する経過観察が必要なため。なお、5年以上再発していない場合は寛解と判断されるため組み入れ可とする。

- 9) 認知症、精神疾患と診断され治療中の患者は、対象者の来院等に伴う基礎疾患のリスクを考慮する必要があるため。
  - 10) 血糖コントロールが著しく不良な糖尿病 (HbA1c(NGSP) > 10.0%) を合併している患者は、糖尿病の治療のために医師から入院を勧められる状態にあるため。
  - 11) III度高血圧であり、脳心血管病リスクが最も高い症例であり、数週間以内に速やかに高圧目標を達成する必要があり、放置すると治験中の脳心血管死を招く恐れがあるため。
  - 12) AST、ALT が CTCAE Grade 2 以上に相当し肝障害が疑われるため。血清クレアチニンは CTCAE Grade 1 以上に相当し腎障害が疑われるため。
  - 13) 本電気刺激療法の胎児・新生児への影響に関する動物実験がなく影響が不明なため。
- 1, 2, 3, 5, 6, 14, 15) 対象患者の正確な有効性を評価するため。
- 1) 電気刺激群では「フォスフェン」や「頬の弱いピリピリ感」を感じ、シヤム群では何も感じないため、バイアスがかかるため除外する。
  - 2) 3 ヶ月以内に内眼部手術を受けている場合は視機能に手術の影響が残っている恐れがあり対象患者の正確な有効性を評価するのが難しいため。
  - 3) スクリーニング前 31 日以内にイソプロピルウノプロストン・カルシウム拮抗薬・暗順応改善薬の用量・用法を変更した場合、薬剤の影響が安定していないため、信頼性のあるベースライン値が測定できない可能性があるため。
  - 5) 合併症による視機能障害と網膜色素変性による視機能障害が分離できず対象患者の正確な有効性を評価できないため。
  - 6) 直近 3 年の網膜色素変性が安定期にあり、視機能の変化が得られない可能性があるため。
  - 14) 他の治験が本治験の成績に影響を及ぼす恐れがあるため。
  - 15) 治験責任医師又は治験分担医師により、対象患者の前歴や行動により正確な有効性を評価することが困難と判断される可能性があるため。

## 4. 被験者の同意

### 4.1. 同意文書及びその他の説明文書の作成並びに改訂

治験責任医師は、被験者から治験参加の同意を得るために用いる同意文書及びその他の説明文書を可能な限り平易な表現で作成する。また、同意文書及びその他の説明文書を改訂する必要があると認めた場合は、これらを改訂する。

治験責任医師は、作成又は改訂された同意文書及びその他の説明文書を治験審査委員会に提出し、その承認を得る。

### 4.2. 同意取得の時期と方法

#### 1) 同意の取得

治験責任医師又は治験分担医師は、治験審査委員会の承認を得た同意文書及びその他の説明文書を被験者に手渡し、「4.3 被験者に対する説明事項」に示す内容について十分な説明を行う。また、必要な場合には、治験協力者も被験者に補足的な説明を行う。被験者が治験の内容を良く理解したことを確認した上で、前観察期間（スクリーニング）検査を実施するまでに文書で自由意思による同意を取得する。

#### 2) 説明時の被験者への対応

治験責任医師又は治験分担医師は、同意を得る前に被験者が質問をする機会と当該治験に参加するか否かを判断するのに十分な時間を与え、被験者の質問に対しては、被験者が満足するように回答する。

#### 3) 同意書への記入方法及び説明文書の交付

被験者の同意に際しては、説明を行った治験責任医師又は治験分担医師が記名押印又は署名し、説明した日付を記入する。被験者は同意書に記名押印又は署名し、同意した日付を記入する。なお、治験協力者が補足的な説明を行った場合は、当該治験協力者も記名押印又は署名し、説明した日付を記入する。同意を得た後、説明文書及び同意書の写しを被験者に交付する。

#### 4) 説明文書改訂時

治験責任医師又は治験分担医師は、被験者の同意に関連し得る新たな情報の入手等により同意文書及びその他の説明文書を改訂した場合、その都度、被験者に対して改訂された同意文書及びその他の説明文書を用いて改めて説明し、治験への参加継続について被験者から文書で自由意思による再同意を取得する。なお、被験者の同意に影響を与えうる新たな重要な情報が得られた場合には、直ちに当該情報を被験者に提供し、これを文書により記録するとともに、被験者が治験に継続して参加するかどうかを確認する。

#### 4.3. 被験者に対する説明事項

治験責任医師が作成する説明文書には、以下の事項を記載する。

- 1) 当該治験が研究を伴うこと
- 2) 治験の目的
- 3) 治験責任医師の氏名、職名及び連絡先
- 4) 治験の方法
- 5) 予期される臨床上の利益及び危険性又は不便
- 6) 被験者に対する他の治療方法の有無及びその治療方法に関して予測される重要な利益及び危険性
- 7) 被験者の治験に参加する予定期間
- 8) 治験への参加は被験者の自由意思によるものであり、被験者は治験への参加を随時拒否又は撤回することができること。また、拒否・撤回によって被験者が不利な扱いを受けることはないこと、治験に参加しない場合にうけるべき利益を失うことはないこと
- 9) モニター、監査担当者、治験審査委員会及び規制当局が医療に係る原資料を閲覧できること。その際、被験者の秘密は保全されること
- 10) 治験の結果が公表される場合であっても、被験者の秘密は保全されること
- 11) 治験に関連する健康被害が発生した場合に被験者が受けることのできる補償及び治療
- 12) 治験への参加継続について被験者の意思に影響を与える可能性のある情報が得られた場合には速やかに被験者に伝えられること
- 13) 治験への参加を中止させる場合の条件又は理由
- 14) 治験に関し被験者が負担をする費用
- 15) 治験に関し被験者に金銭等が支払われる場合にはその内容（支払額算定の取決め等）
- 16) 被験者が治験及び被験者の権利に関してさらに情報がほしい場合又は治験に関連する健康被害が生じた場合に照会すべき又は連絡をとるべき医療機関の相談窓口
- 17) 被験者が守るべき事項
- 18) 当該治験の適否等について調査審議を行う治験審査委員会の種類、各治験審査委員会において調査審議を行う事項その他当該治験に係る治験審査委員会に関する事項
- 19) 知的財産
- 20) 利益相反

## 5. 治験の方法

### 5.1. 治験のデザイン

本治験は、網膜色素変性患者に対する、皮膚電極を用いた経皮膚電気刺激による視機能の維持・改善効果及び安全性を検証するランダム化、二重遮蔽、シヤム対照、多施設共同試験である。

本治験のデザインは以下のとおりである。

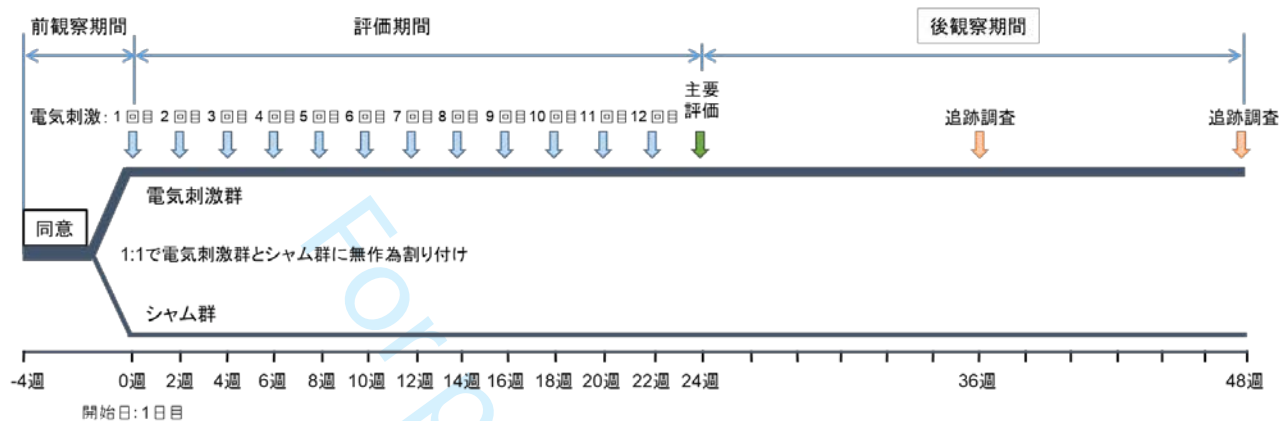

#### <刺激条件>

##### ➤ 電気刺激群

- ・ 電流強度：1.0 mA
- ・ パルス幅：10 ms/相 双極性
- ・ 刺激頻度：20 Hz
- ・ 刺激時間：30 分

##### ➤ シヤム群

- ・ 電流強度：0 mA
- ・ パルス幅：0 ms/相 双極性
- ・ 刺激頻度：0 Hz
- ・ 刺激時間：30 分

#### 【設定根拠】

刺激条件は「網膜色素変性を対象とした経皮膚電気刺激の安全性および有効性を検討する探索的試験（第Ⅱ相試験）（試験番号 K29001）」において安全性が示唆され、logMAR 視力、ETDRS 視力及び静的視野検査で有効性の認められた条件と同じに設定した。

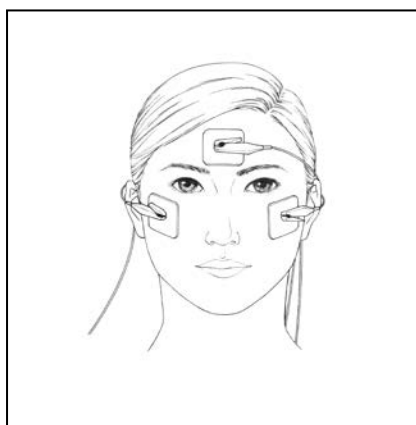

#### <刺激方法>

電気刺激群及びシヤム群における対象患者の前額部の中央及び両眼の下眼瞼耳側の皮膚に電極を装着し（左図参照）、電気刺激群のみ電気刺激装置から電極を通して電気刺激を行う。電流表示液晶ディスプレイは被験者から見えないように遮蔽等の措置を講じること。

シヤム群では皮膚電極を所定の位置に装着し、コードを接続した後、機器の電源を入れる。通電する電流量は0 mAとし、スタートボタンを押して30分間のタイマーを開始する。

TdES 実施日を記載する。

## 5.2. 目標被験者数と治験実施期間

50 例（電気刺激群 25 例、シヤム群 25 例）

主要評価項目は片眼（両眼とも選択・除外基準に適合する場合は右眼とする）とする。

治験実施期間：1 年 10 ヶ月（2021 年 6 月 1 日～2023 年 3 月 31 日）

症例登録期間：10 ヶ月（2021 年 6 月 1 日～2022 年 3 月 31 日）

## 5.3. 施設登録

施設登録は、千葉大学医学部附属病院 臨床試験部 データマネジメント室で行う。

### 5.3.1. 施設登録

- 1) 治験責任医師は、当該施設の治験審査委員会で承認が得られた後、治験審査委員会の承認通知書の写し及び施設登録依頼書を FAX する。
- 2) 千葉大学医学部附属病院 臨床試験部 データマネジメント室は、施設登録を行い、施設登録完了通知書を治験責任医師に送付し、大阪大学医学部附属病院 未来医療開発部 データセンターへ施設登録が完了した旨を報告する。

### 5.3.2. 施設登録先

千葉大学医学部附属病院 臨床試験部データマネジメント室

受付 FAX 番号：043-222-1207

問合せ電話番号：043-222-1206

※ 受付時間は月～金の 9:00～17:00（土日、祝日、年末年始を除く。）

※ 受付時間外に FAX を受信した場合は、翌稼働日の受付とする。

## 5.4. 症例登録

症例登録は、大阪大学医学部附属病院 未来医療開発部 データセンターにおける中央登録制とする。

### 5.4.1. 症例登録・割付

- 1) 治験責任医師又は治験分担医師は、文書による同意を取得し、スクリーニング検査の結果、被験者が選択基準を満たし、除外基準に抵触していないことを確認する。治験責任医師又は治験分担医師が「適格」と判断した被験者について、治験責任医師、治験分担医師又は治験協力者は指定された URL にアクセスし、Web サイト上で必要な情報を入力の上、症例登録及び割付を行う。
- 2) 治験責任医師又は治験分担医師は、適格性判定を画面上で確認し、適格と判定されたことを確認する。割付結果は unblind staff のみが確認できる。

一度登録された被験者の登録取り消しはされない。治験責任医師又は治験分担医師は、誤登録が判明した際には速やかに大阪大学医学部附属病院未来医療開発部データセンターに連絡する。

※ 治験責任医師又は治験分担医師は、被験者の登録もしくは割付がなされるまでプロトコル治療をしてはならない。

#### 5.4.2. 症例登録先

大阪大学医学部附属病院 未来医療開発部 データセンター

Mail : [epico-sr@dmi.med.osaka-u.ac.jp](mailto:epico-sr@dmi.med.osaka-u.ac.jp)

※ 受付時間は月～金の 9:00～17:00（土日、祝日、年末年始を除く。）

症例登録 Web サイト（DATATRAK Enterprise Cloud）

URL : <https://secure.datatrak.net>

※ 土日祝を含む 365 日、24 時間入力可能（保守点検等によるシステム停止時間を除く。）

#### 5.4.3. 割付調整因子

割付調整因子は、矯正小数視力（0.3 以下、0.4 以上）とし、割付方法は動的割付とする。

#### 5.4.4. 割付情報の管理

割付責任者及び割付担当者は、割付情報を症例登録システムで作成し、管理する。

### 5.5. 遮蔽化

本治験は電気刺激群及びシャム群に対する二重遮蔽デザインを用いて実施する。電気刺激装置の通電操作のみを実施するスタッフ（治験分担医師、治験コーディネーター：unblind staff）を置き、unblind staff のみが無作為化コードを確認できる。電気刺激装置の通電操作以外の規定検査、評価を実施する治験責任医師、治験分担医師、治験協力者（視能訓練士、治験コーディネーター）には通電の有無に関する情報、通電時の被験者の状態等を含めた情報を遮断することにより盲検性を確保し、被験者にはシャム施術及び電気刺激装置の遮蔽等治療の盲検性を最大限確保する措置を実施する。治験調整医師、治験責任医師、治験分担医師、治験コーディネーター及び治験のモニタリング等を行うその他のスタッフに対して、無作為化コードは開鍵後まで知らされない。

### 5.6. コードの開鍵

無作為化コードは、データ固定後に開封する。

### 5.7. 緊急コード開封の手続き

治験機器との因果関係が否定できない重篤な有害事象が発現し、被験者の安全性確保のため緊急コードの開封が必要であると治験責任医師が判断した場合には、治験調整医師の同意を得た上で治験責任医師は当該被験者の割付群を unblind staff より確認する。治験責任医師が緊急時の緊急コードを開封した場合、治験責任医師は実施医療機関の長及び割付責任者に連絡を行う。

### 5.8. 登録されなかった被験者の取り扱い

登録において、不適格等の何らかの理由で登録が行われなかった被験者は、治験の登録症例には含めない。治験責任医師又は治験分担医師は、当該被験者に本治験への登録が不可である旨を説明する。

### 5.9. 個々の症例の中止基準

以下の基準に該当した場合、治験責任医師又は治験分担医師は治験機器施行を中止する。検査スケジュール記載の中止時検査・評価を実施する。なお、電話等により被験者から連絡を受けた場合にも状況に応じて症例の継続・中止を判断することが出来る。その場合、中止時検査・評価は被験者の状態等を考慮の上、実施可能な時期に設定する。

- 1) 被験者から治験参加の辞退の申し出や同意撤回があった場合。
  - 2) 治験登録後、被験者が対象として不適格であることが判明した場合。
  - 3) 合併症の増悪により治験の継続が困難な場合。
  - 4) 有害事象により治験の継続が困難な場合。
  - 5) 妊娠が判明した場合。
  - 6) 治験全体が中止された場合。
  - 7) その他の重大な治験実施計画書違反が判明した場合。
  - 8) 治験担当医師又は治験分担医師の判断により中止の必要性が認められた場合。
- ・ 治験責任医師又は治験分担医師は中止日、中止理由等の必要事項を記録する。また、中止時の規定項目を可能な範囲で行う。
  - ・ 2)、7)以外は治験が中止された場合の「中止日」は、中止の理由となる事象が発現した日又は判明した日ではなく、治験責任医師又は治験分担医師が中止を判断した日とする。
  - ・ 治験責任医師又は治験分担医師は、治験機器施行開始後に中止基準に該当する被験者が判明した場合には、当該被験者にその旨を説明して治験を中止し、適切な処置を行う。
  - ・ 治験機器との因果関係が否定出来ない有害事象については、原則として症状が回復又は軽快するまで可能な限り観察継続する。

### 5.10. 併用可能薬及び併用可能療法

併用薬は指定しない。併用療法については、評価眼に対する眼科手術を行う必要が生じた際には、当該被験者の治験を中止とする。

### 5.11. 併用禁止薬及び併用禁止療法

- ・ 他の治験薬、治験製品及び治験機器

### 5.12. 併用制限薬

スクリーニング前 31 日以内から治験終了まで、以下の用量・用法を変更しない。

- ・ カルシウム拮抗薬の内服
- ・ 暗順応改善薬（アダプチノール®）の内服
- ・ イソプロピルウノプロストン製剤

### 5.13. 治験中止後の対応

治験を中止した被験者には、必要な検査・観察を実施し、必要に応じて適切な処置を講じる。



## 6. 治験機器

### 6.1. 外観及び構成

電気刺激装置、皮膚電極（エールローデ®、積水化成品工業株）及びこれらを接続する電極接続ケーブルで構成されている。

#### 1. 本体

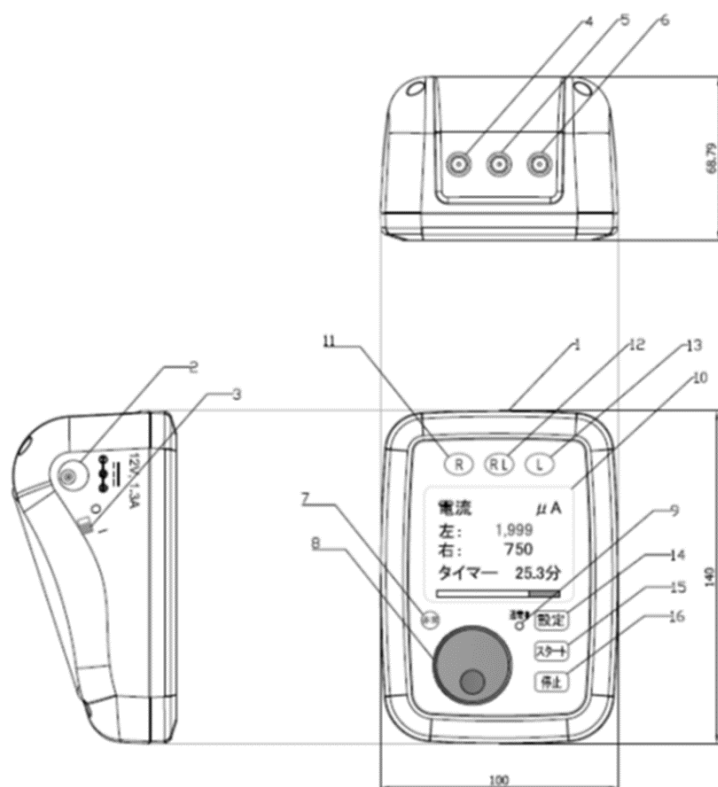

|    |              |    |              |    |                |    |               |
|----|--------------|----|--------------|----|----------------|----|---------------|
| 1  | 本体           | 2  | ACアダプタジャック   | 3  | 電源スイッチ         | 4  | 電極コネクタ (R)    |
| 5  | 電極コネクタ (COM) | 6  | 電極コネクタ (L)   | 7  | 非常停止ボタン        | 8  | ダイヤル          |
| 9  | 通電中ランプ       | 10 | 液晶ディスプレイ     | 11 | ボタンスイッチ (R)    | 12 | ボタンスイッチ (R+L) |
| 13 | ボタンスイッチ (L)  | 14 | ボタンスイッチ (設定) | 15 | ボタンスイッチ (スタート) | 16 | ボタンスイッチ (ポーズ) |

#### 2. 電極パッド（エールローデ®）

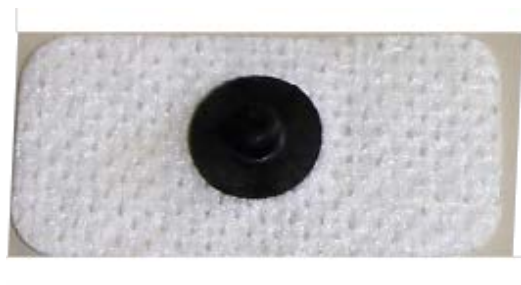

#### 3. 電極リード線

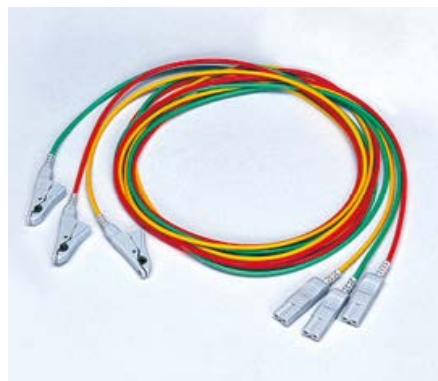

## 6.2. 安全装置

装置には、非常停止ボタンを装備している。

## 6.3. 作動原理

機器は、AC アダプタから電源が供給される。AC アダプタは商用交流電源（100 VAC, 50/60 Hz）から直流 12 V の電源（DC 12 V）が生成される。AC アダプタはスイッチング方式で交流から所定の直流が生成される。スイッチング方式は、以下の過程を経て直流が生成される。

- 1) 100 VAC をダイオードブリッジ整流器で正側に波が整流されコンデンサで平滑化される。
- 2) 高周波トランスで 1 次側が高速で on/off スwitchingされた電流が 2 次側に出力される。
- 3) 整流ダイオードを経て平滑化されて直流電源が出力される。

スイッチング方式は、回路構成が複雑であるが高耐圧部品により構成されている。電気的安全性試験で求められる耐圧試験にはスイッチング方式の方が性能的に優位であり、本装置で使用されている AC アダプタもスイッチング方式によるものである。

CPU 回路では、6 個の設定を行うボタンスイッチ及び非常停止ボタンが押されたかどうかの状況の有無からの入力と、ダイヤルが時計回り／反時計回りに回転された状態の入力から、CPU に書き込まれたファームウェアにより、プログラムが実行される。プログラムの実行状況やボタンスイッチ及びダイヤルの状況は 2.8 インチ、240(RGB)×320 解像度の液晶ディスプレイに表示される。CPU は 25 MHz 及び 32.768 kHz の水晶発振器によって正確なクロックで制御されている。

通電する電流は、オペアンプ及び FET トランジスタで定電流回路と 12 ビット DAC（デジタル・アナログ変換回路）によって電流量が正確に制御される。

正負両極刺激は論理回路により On/Off の情報がフォトカプラに入力され、光絶縁されて患者に電極が接続されている 3 個のソケットに出力される。

電気刺激を行うための電源は、直流 12 V を DC-DC（昇圧型 DC-DC 変換モジュール回路）に入力し、100 V の直流電圧が出力される。それをコンデンサにより平滑化して直流 100 V が生成される。

## 6.4. 品質

有限会社メイヨー稲沢研究所は、当局が定めた QMS 省令に適合している事業所であると認定されており、医療機器登録製造所の認可を受けている。また、認証機関である株式会社コスモス・コーポレーション（認証機関番号：AG）により、認証を受けたすべての医療機器に対して、QMS 定期調査により適合を認定されている。治験機器に対しては ISO14971 に従ってリスクマネジメントを実施し、当該治験機器においても品質は担保されている。

### 6.4.1. 安全性

当該治験機器は、以下の電氣的安全性に関する医療機器の JIS 規格に適合するように設計されている。

| 規格番号            | 標題                                                     |
|-----------------|--------------------------------------------------------|
| JIS T 0601-1    | 医用電気機器-第 1 部：基礎安全及び基本性能に関する一般要求事項                      |
| JIS T 0601-1-2  | 医用電気機器-第 1-2 部：基礎安全及び基本性能に関する一般的要求事項-副通則：電磁妨害-要求事項及び試験 |
| JIS T 0601-2-10 | 医用電気機器-第 2-10 部：神経及び筋刺激装置の基礎安全及び基本性能に関する個別要求事項         |

基本的な電氣的安全性試験とされている耐電圧試験、漏れ電流試験、低抵抗試験及び消費電力については、規格の要求事項に適合しており患者の安全性を担保すると考える。安全性試験においては量産機について実施予定である。本治験時には、JIS T0601-1 及び JIS T0601-1-2 に適合している付属の AC アダプタを使用し、電磁的影響に関し他の電子機器から電磁的な影響を受けない、また与えないような空間距離を担保する等安全対策を講じたうえで実施する。

使用する電流量からは有害事象が発生する可能性は低いと推測されるが、電極装着部位に一致した皮膚炎や角膜障害が生じる可能性がある。また電気刺激による電極装着部位付近の皮膚に刺激感を感じる事が予測される。

### 6.4.2. 性能

医療機器の JIS 規格 T0601-2-10 で要求される精度を含めて以下に表示する。

- 電流値： 0~2,000  $\mu$ A (精度 定格出力 0~ $\pm$ 20%)
- 刺激頻度： 20 Hz (精度 $\pm$ 1%)
- 出力波形： 正負両相
- パルス幅： 各相 10 msec (精度 $\pm$ 1%)

### 6.4.3. 製造

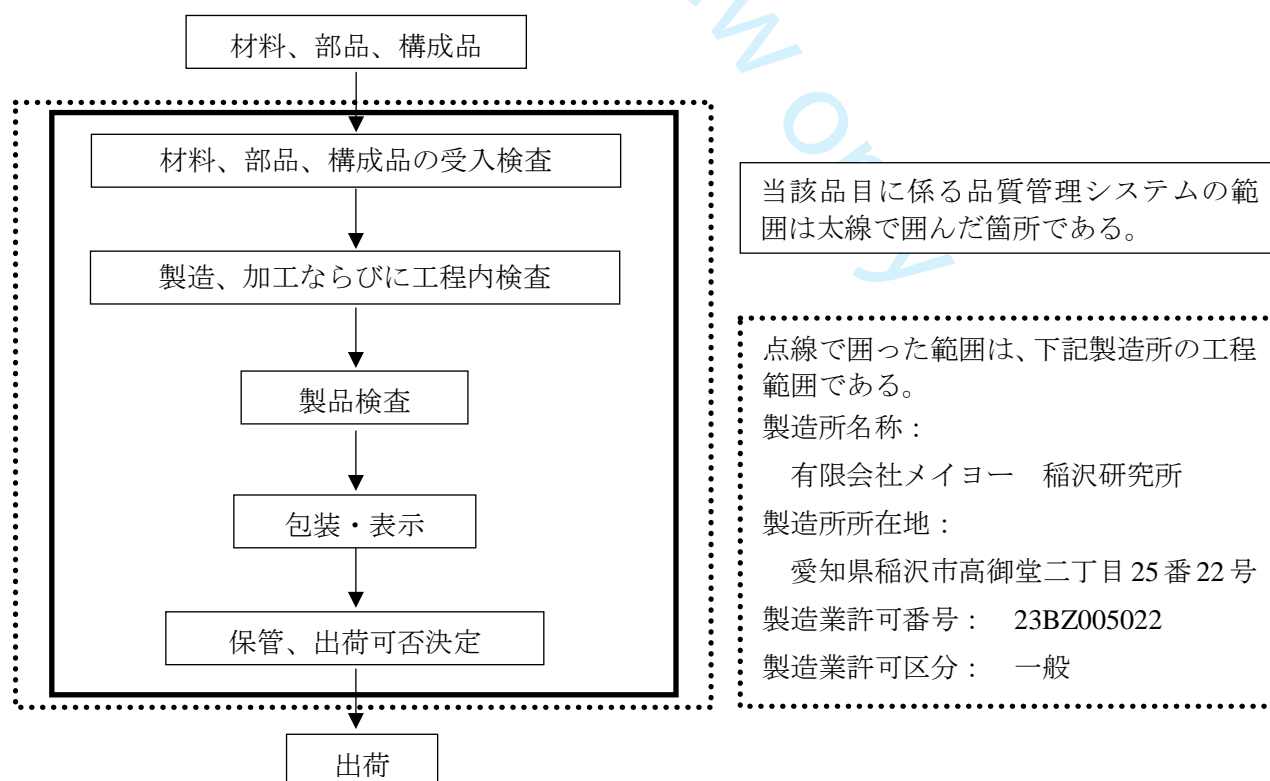

## 6.5. 包装・表示

< 治験機器ラベル（見本） >

**治験用**

**経皮膚電気刺激装置（型番号記載）**

< 注意 >

- ・ 未使用機器は破棄せずに保管して治験機器提供者に返却してください。
- ・ 治験以外には絶対使用しないでください。

< 保存条件 > 高温、多湿、直射日光を避けて保管すること。

治験調整医師：山本 修一

職名：特任教授

住所：千葉県千葉市中央区亥鼻 1-8-1

製造番号：

ラベルには治験調整医師の職名及び経皮膚電気刺激装置の製造番号を記載する。

## 6.6. 管理方法

- 1) 治験調整医師は治験開始後速やかに治験機器を実施医療機関の治験責任医師へ交付する。
- 2) 治験実施医療機関の治験機器管理者は、治験責任医師から実施医療機関の長を通じて提供された手順書に従って、治験機器を室温にて適切に管理する。
- 3) 治験責任医師は、治験機器の供給される保存条件、使用期限等取扱い方法を説明した文書を作成し、これを実施医療機関の長、治験分担医師、治験協力者、治験機器管理者等に交付する。
- 4) 治験責任医師及び治験分担医師は、治療を行う機器番号を確認し、治療中以外も含め治療機器に不具合が生じた場合は、その機器番号と不具合の状況を報告し、交換・修理が必要な場合は速やかに対応する。



- 1 a) スクリーニングと評価期 0 週の検査を同日に実施する場合、重複する検査についてはスクリーニング検査の結果を評価期 0 週の検査結果として使用可能。
- 2 b) 同意取得と登録までの期間が 31 日間を超えた場合は、再同意を文書で取得し再度スクリーニング検査を実施し登録可能とする。
- 3 c) 自他覚症状（角膜炎、皮膚炎の他、前眼部・中間透光体の評価、顔面神経や三叉神経、鼻への影響も確認）は TdES 実施前と実施直後に実施する。
- 4 d) 血圧は、スクリーニング時に測定し、それ以外は必要に応じて測定する。
- 5 e) 臨床検査項目は、AST(GOT)、ALT(GPT)、ALP、総ビリルビン、BUN、血清クレアチニン、HbA1c、赤血球、白血球、ヘモグロビン、血小板とする。
- 6 f) 前観察期間の静的視野検査（HFA）10-2 プログラムは、計測値の信頼性（固視不良率 20 %未満、偽陽性率 15 %未満、偽陰性率 33 %未満）を確認する。信頼性
- 7 が確認できなかった場合は再測定するか、同意取得時 6 ヶ月以内の自施設での計測値を使用可とする。静的視野検査（HFA）は 10-2 プログラムとエスターマン
- 8 テスト（100 点）を実施する。
- 9 g) 光干渉断層計は、エリプソイドゾーン（EZ）長、中心窩下の厚み（中心窩網膜厚）を計測・数値化する。電気刺激の網膜への安全性も確認する。検査は散瞳後
- 10 実施する。
- 11 h) 眼底検査は散瞳後実施する。
- 12 i) 有害事象とは副作用等好ましくないすべての事象のことで、治療との因果関係は問わない。
- 13
- 14
- 15
- 16
- 17
- 18
- 19
- 20
- 21
- 22
- 23
- 24
- 25
- 26
- 27
- 28
- 29
- 30
- 31
- 32
- 33
- 34
- 35
- 36
- 37
- 38
- 39
- 40
- 41
- 42
- 43
- 44
- 45
- 46

### 7.1.1. スクリーニング検査

同意取得後、スクリーニング検査を開始する。治験責任医師又は治験分担医師は以下のスクリーニング検査を行い、選択基準を満たし、除外基準に抵触しない患者を被験者とする。検査項目は以下に記載のとおりとし、眼の検査に関しては両眼について実施し評価眼を決定する。

1) 自覚症状

※角膜炎、皮膚炎の他、前眼部・中間透光体の評価、顔面神経や三叉神経、鼻への影響も確認する。

2) 血圧

3) 臨床検査（採血）

※AST(GOT)、ALT(GPT)、ALP、総ビリルビン、BUN、血清クレアチニン、HbA1c、赤血球、白血球、ヘモグロビン、血小板数を測定する。

4) logMAR 視力（矯正小数視力）

5) ETDRS 視力

6) 静的視野検査（HFA）：10-2 プログラム及びエスターマンテスト（100 点）

7) 光干渉断層計（OCT）：エリプソイドゾーン（EZ）長、中心窩下の厚み（中心窩網膜厚）

※エリプソイドゾーン（EZ）長、中心窩を通るスライス長 6 mm における水平及び垂直断面の 2 方向撮影し、中心窩下の厚み（中心窩網膜厚）を計測し・数値化する。電気刺激による網膜への安全性確認も併せて実施する。

- エリプソイドゾーン（EZ）長：黄色矢印の間の長さ（▼：EZ）。

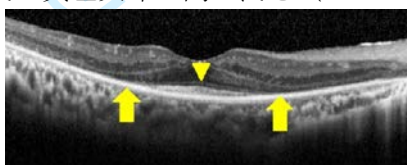

- 中心窩下の厚み（中心窩網膜厚）：黄色矢印で示した長さ。

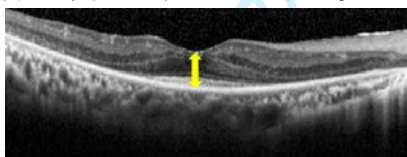

8) NEI VFQ 25 コンポ 9

※VFQ-25: The 25-item National Eye Institute Visual Function Questionnaire（視覚に関連した健康関連 QOL を測定する 12 の尺度「全体的健康感」、「全体的見え方」、「目の痛み」、「近見視力による行動」、「遠見視力による行動」、「見え方による社会生活機能」、「見え方による心の健康」、「見え方による役割制限」、「見え方による自立」、「運転」、「色覚」及び「周辺視覚」）から、「全体的健康感」、「目の痛み」及び「運転」を除いた 9 項目の平均値を求めるコンポ 9 を用いた QOL。

9) 細隙灯顕微鏡検査

10) 眼圧・眼底検査（カラー眼底写真）

11) 妊娠検査

※スクリーニング時、女性被験者を対象に、実施医療機関で定められた基準に従い、尿中 hCG 検査を実施する。ただし、両側卵巣摘出又は子宮摘出の既往歴がある被験者、又は別の医学的理由を伴わずに月経のない状態が 12 ヶ月以上にわたる被験者は実施不要とする。

12) 有害事象の観察

- なお、6) に関しては、同意取得前の自施設でのデータを使用することができる。
- 7) 10) に関して、OCT 及び眼底検査は散瞳してから実施する。

- 1  
2  
3  
4  
5  
6  
7
- 10) 眼圧検査に関しては、COVID-19 感染拡大防止の観点から、治験責任医師又は治験分担医師の判断で非実施とすることが出来る。この場合は、治験実施計画書からの逸脱とはしない。

### 7.1.2. 被験者の情報

8  
9  
10  
11  
12  
13  
14  
15  
16  
17  
18  
19  
20  
21  
22  
23  
24  
25  
26  
27  
28

同意取得時又はスクリーニング検査時に、以下の被験者情報を記録する。

- 1) 同意取得日
- 2) 被験者識別コード
- 3) 性別
- 4) 同意取得時年齢・生年月日
- 5) 身長・体重
- 6) 既往・合併症
- 7) 前治療歴
- 8) 併用薬・併用療法
- 9) 治験期間中に使用する予定の薬剤に対するアレルギーの有無
- 10) 評価眼（両眼ともに選択基準等を満たす場合、評価眼は右目とする）

### 7.1.3. 観察・検査・評価項目

29  
30  
31  
32  
33  
34  
35  
36  
37  
38  
39  
40  
41  
42  
43  
44  
45  
46  
47  
48  
49  
50  
51  
52  
53  
54  
55  
56  
57  
58  
59  
60

各来院時における検査項目を以下に記す。なお、治験責任医師又は治験担当医師の判断で、安全性上等の必要に応じて検査を追加することは可能とする。

眼圧検査に関しては、COVID-19 感染拡大防止の観点から、治験責任医師又は治験分担医師の判断で非実施とすることが出来る。この場合は、治験実施計画書からの逸脱とはしない。

#### 【評価期 0 週】

- 治験機器施行前に以下を実施する。
  - ※スクリーニングと評価期 0 週の検査を同日に実施する場合、重複する検査についてはスクリーニング検査の結果を評価期 0 週の検査結果として使用可能。
  - 1) 自覚症状：両眼に実施
    - ※角膜炎、皮膚炎の他、前眼部・中間透光体の評価、顔面神経や三叉神経、鼻への影響も確認する。
  - 2) logMAR 視力（矯正小数視力）：評価眼に実施
  - 3) ETDRS 視力：評価眼に実施
  - 4) 有害事象の観察
- 治験機器施行後、当日中に以下を実施する。
  - 1) 自覚症状：両眼に実施
    - ※角膜炎、皮膚炎の他、前眼部・中間透光体の評価、顔面神経や三叉神経、鼻への影響も確認する。
  - 2) 有害事象の観察

#### 【評価期 2, 4, 8, 10, 14, 16, 18, 20, 22 週】

- 治験機器施行前に以下を実施する。
  - 1) 自覚症状：両眼に実施
    - ※角膜炎、皮膚炎の他、前眼部・中間透光体の評価、顔面神経や三叉神経、鼻への影響も確認する。



- 2) logMAR 視力（矯正小数視力）：評価眼に実施
- 3) 有害事象の観察

● 治験機器施行後、当日中に以下を実施する。

- 1) 自他覚症状：両眼に実施  
※角膜炎、皮膚炎の他、前眼部・中間透光体の評価、顔面神経や三叉神経、鼻への影響も確認する。
- 2) 有害事象の観察

【評価期 6 週】

● 治験機器施行前に以下を実施する。

- 1) 自他覚症状  
※角膜炎、皮膚炎の他、前眼部・中間透光体の評価、顔面神経や三叉神経、鼻への影響も確認する。
- 2) logMAR 視力（矯正小数視力）：評価眼に実施
- 3) 細隙灯顕微鏡検査：両眼に実施
- 4) 眼圧・眼底検査（カラー眼底写真）：両眼に実施
- 5) 有害事象の観察

なお、4) に関して、眼底検査は散瞳してから実施する。

● 治験機器施行後、当日中に以下を実施する。

- 1) 自他覚症状：両眼に実施  
※角膜炎、皮膚炎の他、前眼部・中間透光体の評価、顔面神経や三叉神経、鼻への影響も確認する。
- 2) 有害事象の観察

【評価期 12 週】

● 治験機器施行前に以下を実施する。

- 1) 自他覚症状：両眼に実施  
※角膜炎、皮膚炎の他、前眼部・中間透光体の評価、顔面神経や三叉神経、鼻への影響も確認する。
- 2) logMAR 視力（矯正小数視力）：評価眼に実施
- 3) ETDRS 視力：評価眼に実施
- 4) 静的視野検査（HFA）：10-2 プログラム及びエスターマンテスト（100 点）：評価眼に実施
- 5) 光干渉断層計（OCT）：エリプソイドゾーン（EZ）長、中心窩下の厚み（中心窩網膜厚）：評価眼に実施  
※エリプソイドゾーン（EZ）長、中心窩を通るスライス長 6 mm における水平及び垂直断面の 2 方向撮影し、中心窩下の厚み（中心窩網膜厚）を計測し・数値化する。電気刺激による網膜への安全性確認も併せて実施する。
- 6) NEI VFQ 25 コンポ 9
- 7) 細隙灯顕微鏡検査：両眼に実施
- 8) 眼圧・眼底検査（カラー眼底写真）：両眼に実施
- 9) 有害事象の観察

なお、5) 8) に関して、OCT 及び眼底検査は散瞳してから実施する。

- 治験機器施行後、当日中に以下を実施する。

- 1) 自他覚症状：両眼に実施  
※角膜炎、皮膚炎の他、前眼部・中間透光体の評価、顔面神経や三叉神経、鼻への影響も確認する。
- 2) 有害事象の観察

#### 【評価期 24 週、後観察期 48 週】

- 来院時に以下を実施する。：両眼に実施

- 1) 自他覚症状  
※角膜炎、皮膚炎の他、前眼部・中間透光体の評価、顔面神経や三叉神経、鼻への影響も確認する。
- 2) logMAR 視力（矯正小数視力）：評価眼に実施
- 3) ETDRS 視力：評価眼に実施
- 4) 静的視野検査（HFA）：10-2 プログラム及びエスターマンテスト（100 点）：評価眼に実施
- 5) 光干渉断層計（OCT）：エリプソイドゾーン（EZ）長、中心窩下の厚み（中心窩網膜厚）：評価眼に実施  
※エリプソイドゾーン（EZ）長、中心窩を通るスライス長 6 mm における水平及び垂直断面の 2 方向撮影し、中心窩下の厚み（中心窩網膜厚）を計測し・数値化する。電気刺激による網膜への安全性確認も併せて実施する。
- 6) NEI VFQ 25 コンボ 9
- 7) 細隙灯顕微鏡検査：両眼に実施
- 8) 眼圧・眼底検査（カラー眼底写真）：両眼に実施
- 9) 有害事象の観察

なお、5) 8) に関して、OCT 及び眼底検査は散瞳してから実施する。

#### 【後観察期 36 週】

- 来院時に以下を実施する。

- 1) 自他覚症状：両眼に実施  
※角膜炎、皮膚炎の他、前眼部・中間透光体の評価、顔面神経や三叉神経、鼻への影響も確認する。
- 2) logMAR 視力（矯正小数視力）：評価眼に実施
- 3) ETDRS 視力：評価眼に実施
- 4) 光干渉断層計（OCT）：エリプソイドゾーン（EZ）長、中心窩下の厚み（中心窩網膜厚）：評価眼に実施  
※エリプソイドゾーン（EZ）長、中心窩を通るスライス長 6 mm における水平及び垂直断面の 2 方向撮影し、中心窩下の厚み（中心窩網膜厚）を計測し・数値化する。電気刺激による網膜への安全性確認も併せて実施する。
- 5) 細隙灯顕微鏡検査：両眼に実施
- 6) 眼圧・眼底検査（カラー眼底写真）：両眼に実施
- 7) 有害事象の観察

なお、4) 6) に関して、OCT 及び眼底検査は散瞳してから実施する。

## 【中止時】

治験責任医師又は治験分担医師により治験機器施行の中止を判断された日から 7 日以内に可能な範囲で以下を実施する。

- 1) 自覚症状：両眼に実施  
※角膜炎、皮膚炎の他、前眼部・中間透光体の評価、顔面神経や三叉神経、鼻への影響も確認する。
- 2) logMAR 視力：評価眼に実施
- 3) ETDRS 視力：評価眼に実施
- 4) 静的視野検査 (HFA)：10-2 プログラム及びエスターマンテスト (100 点)：評価眼に実施
- 5) 光干渉断層計 (OCT)：エリプソイドゾーン (EZ) 長、中心窩下の厚み (中心窩網膜厚)：評価眼に実施  
※エリプソイドゾーン (EZ) 長、中心窩を通るスライス長 6 mm における水平及び垂直断面の 2 方向撮影し、中心窩下の厚み (中心窩網膜厚) を計測し・数値化する。電気刺激による網膜への安全性確認も併せて実施する。
- 6) NEI VFQ 25 コンポ 9
- 7) 細隙灯顕微鏡検査：両眼に実施
- 8) 眼圧・眼底検査 (カラー眼底写真)：両眼に実施
- 9) 有害事象の観察
- 10) 妊娠検査  
※必要に応じてスクリーニング時に実施した被験者を対象として実施する。

なお、5) 8) に関して、OCT 及び眼底検査は散瞳してから実施する。

## 8. 有害事象発生時の取り扱い

### 8.1. 有害事象、不具合及び機器関連有害事象の定義

有害事象とは、治験機器との因果関係の有無に関わらず、当該治験機器の使用した又は使用された被験者その他の者に生じたすべての疾病若しくは障害又はこれらの兆候をいう。ただし、被験者以外の者に生じたものについては、治験機器の使用による影響と疑われるものに限る。

既存の病態（治験期間よりも以前に存在した既往歴又は合併症）については、治験期間内に増悪又は発症頻度の上昇がない限り、有害事象として扱わない。ただし、治験機器施行後に合併症が悪化した場合、有害事象として取扱い、悪化が確認された日を有害事象の発現日とする。

不具合とは、破損、作動不良等広く品質、安全性、性能等に関する治験機器の具合の良くないことをいい、設計、交付、保管、使用のいずれの段階によるものであるかを問わない。治験機器の不具合に関する情報を以下、不具合情報という。

機器関連有害事象とは、有害事象のうち本治験機器又は手技との因果関係が否定できないものをいう。

### 8.2. 有害事象又は不具合発生時の被験者への対応

治験責任医師又は治験分担医師は、有害事象又は不具合を認めたときは、直ちに適切な処置を行うとともに、治験機器の使用を中止した場合や、有害事象に対する治療が必要となった場合には、被験者にその旨を伝える。なお、治験終了・中止時に治験機器との因果関係が否定できない有害事象が未回復の場合は、原則として回復又は軽快するまで可能な限り観察を継続する。ただし、治験責任医師又は治験分担医師が本治験の影響は消失しており、被験者の安全性は十分確保され、それ以上の追跡調査は必要ないと判断した場合はこの限りではない。

### 8.3. 報告の対象となる有害事象及び不具合

同意取得時から治験終了時まで発生したすべての有害事象は、治験機器との因果関係の有無に関わらず報告し、有害事象が消失するか治験期間終了時（中止時）まで観察する。また、治験機器との因果関係が否定できないと判断された有害事象及び発生した不具合情報については治験期間終了時まですべて報告する。

### 8.4. 有害事象及び不具合発生時の報告手順

上記期間に発生したすべての有害事象及び不具合について、治験責任医師又は治験分担医師は、カルテならびに症例報告書に齟齬なく記載する。

### 8.5. 有害事象及び不具合の評価に必要な記載内容

#### 8.5.1. 有害事象

#### 1) 有害事象の名称

有害事象名は、原則として診断名・疾患名（病名）で記録する。診断名・疾患名が特定できない場合や治験責任医師又は治験分担医師より診断名・疾患名としないことが妥当と判断された場合には、臨床症状又は徴候を有害事象名とする。

#### 2) 発現日

- 3) 消失日：回復、回復又は消失したが後遺症あり、死亡の場合に日付
- 4) 転帰：回復、軽快、回復又は消失したが後遺症あり、未回復、死亡、不明
- 5) 処置（治験機器の施行）：変更なし、中止、休止、該当せず
- 6) その他処置：なし、薬物治療、その他
- 7) 重篤度：非重篤、重篤
- 8) 重症度：軽度、中等度、重度
  - ・ 軽度：日常生活に支障を来たさないと考えられる程度の有害事象。例）経過観察可能な程度
  - ・ 中等度：日常生活に支障を来すと考えられる程度の有害事象。例）何らかの介入や治療が必要な程度
  - ・ 重度：日常生活を困難にすると考えられる程度の有害事象。例）高度かつ集中的な治療や全身介助が必要とされる程度
- 9) 治験機器との因果関係：関連が否定できる（否定理由コメント要）、関連が否定できない

### 8.5.2. 不具合

- 1) 不具合を起こした機器番号
- 2) 不具合名
- 3) 不具合の確認日
- 4) 発生日
- 5) 不具合が発生したと考えられる原因及び不具合状況
- 6) 不具合に対する処置
- 7) 当該不具合による有害事象の有無

### 8.5.3. 有害事象の回復性と治験機器との因果関係

#### 8.5.3.1. 治験機器との因果関係

有害事象の回復とは、有害事象がない状態、又は治験機器施行前の状態への回復とする。有害事象における治験機器との因果関係の判定に際しては、被験者の全身状態、合併症、併用薬・併用療法、時間的關係を勘案して判断する。

- 1) 関連が否定できる：他の要因が合理的な可能性を有し説明できる場合、あるいは被験者が治験機器施行開始前
- 2) 関連が否定できない：他の要因との関連がはっきりできない場合

#### 8.5.3.2. 治験機器に関する処置

- 1) 変更なし：有害事象が発現したが、治験機器治療の施行条件に変更がない場合
- 2) 中止：有害事象の発現により、治験機器施行を中止した場合
- 3) 休止：有害事象の発現により、治験機器施行を一時的に休止した場合
- 4) 該当せず：有害事象が治験機器施行開始前又は治験期間終了後に発現した場合

### 8.5.3.3. 転帰

- 1) 回復：有害事象が発現以前の状態に回復、消失した場合
- 2) 回復又は消失したが後遺症あり：有害事象が回復したが、有害事象の影響が後遺症として残っている場合
- 3) 死亡：発現した有害事象が死亡の直接の原因となった場合
- 4) 軽快：有害事象は継続しているが、症状は改善傾向である場合
- 5) 未回復：有害事象は継続している（症状は改善傾向でない）場合
- 6) 不明：被験者の追跡が不能となった場合

## 8.6. 重篤な有害事象発生時の取り扱い

### 8.6.1. 重篤な有害事象の定義

重篤な有害事象とは、次のいずれかに該当するものとする。

- 1) 死亡に至るもの（死亡）
- 2) 生命を脅かすもの（死亡につながるおそれ）
- 3) 入院又は入院期間の延長が必要になるもの
- 4) 永続的又は顕著な障害・機能不全に陥るもの
- 5) 先天性異常をきたすもの
- 6) その他、上記に準じて重篤なもの

なお、以下に記載する理由での「入院」については重篤な有害事象とはみなさない。

- ・ 再検査、追跡調査のための入院又は入院期間の延長、及び治験開始前より予定していた治療又は検査を治験中に実施することのみを目的とした入院（予定手術や検査等）は含まれない。（ただし、その入院中新たに発生したものは有害事象として取り扱う。）
- ・ 本治験の対象疾患に関係のない既存の病態に対する待機的治療のための入院。
- ・ 全身状態の悪化を伴わない、社会的事由及び介護者の一時休息のための入院。

### 8.6.2. 報告の対象となる重篤な有害事象

報告対象は、同意取得時から治験終了（中止）時まで発生した、すべての重篤な有害事象又はその発生のおそれがある事象、及び治験終了（中止）後に治験機器との関連性が疑われる重篤な有害事象とする。

### 8.6.3. 重篤な有害事象等の報告手順

有害事象が発生し、治験責任医師等が重篤と判断した場合、次の手順に従い当該有害事象情報を取り扱う。

#### 1) 治験責任医師から実施医療機関の長への報告

治験責任医師は、同意取得時から、治験期間中に治験機器の不具合等による死亡その他の重篤な有害事象の発生を認めた場合又はその発生のおそれがあると認めた場合は、直ちに各実施医療機関の長に文書にてその内容を報告する。報告に際しては、重篤な有害事象が予測出来ないか否かを特定する。

また、治験責任医師は可能な限り速やかに「重篤な有害事象及び不具合に関する報告書」（統一書式 14）及び「医詳細記載用書式」に当該事象の詳細な内容を記載し、実施医療機関の長に報告する。

#### 2) 治験責任医師から治験調整医師、治験機器提供者への報告

治験責任医師は、同意取得時から、治験期間中に治験機器の不具合等による死亡その他の重篤な有害事象の発生を認めた場合又はその発生のおそれがあると認めた場合は、直ちに治験調整医師及び治験機器提供者にその内容を報告する。

また、治験責任医師は可能な限り速やかに「重篤な有害事象及び不具合に関する報告書」（統一書式 14\_及び医詳細記載用書式）に当該事象の詳細な内容を記載し、治験調整医師に報告する。

#### 3) 治験責任医師と治験調整医師との協議

治験責任医師は、必要に応じ治験調整医師と協議し、治験責任医師としての意見（厚生労働大臣への報告の必要性を含む。）を治験調整委員会に報告する。

また、データモニタリング委員会に治験責任医師の判断について諮問を行った場合には、データモニタリング委員会の意見に従う。

#### 4) 厚生労働大臣への報告

薬機法に規定される報告対象となる有害事象又は不具合と判断した場合は、治験調整医師は「医療機器不具合・感染症症例報告書」（別紙様式第 8）を作成し、データモニタリング委員会及び PMDA へ報告する。

詳細な手順は「安全性情報の取り扱いに関する手順書（仮称）」に従う。

#### 5) 実施医療機関の長への報告

治験責任医師は、厚生労働大臣への報告がなされた場合には、治験調整医師より入手した「医療機器不具合・感染症症例報告書」（別紙様式第 8）及び必要に応じ「医詳細記載用書式」の内容を、可能な限り速やかに実施医療機関の長に報告する。

#### 6) 追加情報の入手時の対応

当該有害事象が発生した実施医療機関の治験責任医師は、当該事象に関する追加情報が得られた場合には、可能な限り速やかに各実施医療機関の長に追加報告を行うとともに、治験調整医師及び治験機器提供者に報告する。当該追加情報の取扱いは、上記 1)~5) の手順に準ずることとし必要に応じ PMDA への報告等を行う。

## 9. 評価項目

### 9.1. 主要評価項目

24 週時における logMAR 視力（矯正小数視力から換算）の 0 週からの変化量における電気刺激群のシャム群に対する優越性

#### 【主要評価項目の設定根拠】

logMAR 視力：国内で実施される視機能の維持・改善効果を検討する臨床研究に広く用いられているため。

### 9.2. 副次評価項目

24 週の下記測定項目における電気刺激群とシャム群の比較

- 1) logMAR 視力
- 2) ETDRS チャートを用いた ETDRS 視力
- 3) 静的視野検査（HFA）：10-2 プログラム MD 値の網膜感度
- 4) 静的視野検査（HFA）：エスターマンテスト（100 点）スコア
- 5) 光干渉断層計（OCT）：黄斑部エリプソイドゾーン長
- 6) 光干渉断層計（OCT）：中心窩網膜厚
- 7) logMAR 視力下面積
- 8) NEI VFQ 25 コンポ 9

#### 【副次評価項目への設定根拠】

- 1) logMAR 視力：国内で実施される視力の維持・改善効果を検討する臨床研究に広く用いられているため。
- 2) ETDRS 視力：欧米及び本邦で広く使用されている視力評価であり視機能判定として臨床現場で定着しているため。
- 3) 静的視野検査（HFA）10-2 プログラム MD 値：中心約 10 度部分以内の視野を詳しく測定するのに向いているため。
- 4) 静的視野検査（HFA）エスターマンテスト（100 点）スコア：自動視野計であり検者間での差異が少なく、再現性・定量性に優れているため。
- 5), 6) OCT における黄斑部エリプソイドゾーン長及び中心窩網膜厚は OCT を用いた自動測定が可能であり、RP の進行度の客観的指標とされているため。
- 7) logMAR 視力下の面積を算出することで、経皮膚電気刺激による logMAR 視力への累積効果を評価できると考え設定する。
- 8) 視覚に関連した健康関連 QOL を測定する尺度として眼科疾患が日常生活に与える影響を評価したり、治療やケアの結果を評価したりするのに広く使用されており、日本語版は、信頼性・妥当性などの計量心理学的特性が検証済みのため。

### 9.3. 探索的評価項目

36 週及び 48 週の下記測定項目における電気刺激群とシャム群の比較



- 1  
2  
3  
4  
5  
6  
7  
8  
9  
10  
11  
12  
13  
14  
15  
16  
17  
18  
19  
20  
21
- 36 週時点
    - 1) logMAR 視力
    - 2) ETDRS チャートを用いた ETDRS 視力
    - 3) 光干渉断層計 (OCT) : 黄斑部エリプソイドゾーン長
    - 4) 光干渉断層計 (OCT) : 中心窩網膜厚
  - 48 週時点
    - 1) logMAR 視力
    - 2) ETDRS チャートを用いた ETDRS 視力
    - 3) 静的視野検査 (HFA) : 10-2 プログラム MD 値の網膜感度
    - 4) 静的視野検査 (HFA) : エスターマンテスト (100 点) スコア
    - 5) 光干渉断層計 (OCT) : 黄斑部エリプソイドゾーン長
    - 6) 光干渉断層計 (OCT) : 中心窩網膜厚

22  
23

**【探索的評価項目への設定根拠】**

- 24  
25  
26  
27  
28
- 1) ETDRS チャートにおける 1 行以上の改善した被験者の割合を検討するため。
  - 2) 本治験機器において視力の低下が抑制されていることを検討するため。
  - 3) 電気刺激治療終了後の効果の維持の有無を探索的に評価するため。

29  
30  
31

**9.4. 安全性評価項目**

- 32
- ・ 同意取得時から評価期 24 週における有害事象の発現状況 (種類、頻度及び重症度等)

33  
34  
35  
36  
37  
38  
39  
40

被験者に観察された有害事象をすべて記録し有害事象の発現状況 (種類、頻度及び重症度等) を解析する。有害事象名は MedDRA/J の LLT に読み替え、PT、SOC で集計をする。第 II 相試験 (試験番号 K29001) では有害事象の発現が見られなかったが、角膜炎、皮膚炎の他、前眼部・中間透光体の評価も行う。また、顔面神経や三叉神経、鼻への影響も受診の際に確認を行う。加えて、光干渉断層計 (OCT) による安全性評価 (電気刺激の網膜への安全性も含む) を行う。

- 41  
42  
43
- ・ 24 週以降 48 週目までの遅発性有害事象の発現状況 (種類、頻度及び重症度等)

44  
45  
46  
47

被験者に観察された治験機器施行完了後、すべての有害事象を記録し遅発性有害事象の発現状況 (種類、頻度及び重症度等) を解析する。解析は最初の 24 週間と同様に行う。

48  
49

**【安全性評価項目の設定根拠】**

50  
51

本治験の安全性について評価するため設定した。

52  
53  
54

**10. 統計学的事項**

55  
56  
57  
58  
59  
60

本治験の統計解析計画の概要を以下にまとめた。なお、統計解析計画の詳細は、統計解析計画書に記載する。統計解析計画書において本治験実施計画書の概要を修正することがあるが、主要評価項目の定義や解析方法が変更される場合には、本治験実施計画書を改訂する。

## 10.1. 解析対象集団

### 10.1.1. 安全性解析対象集団

本治験に登録され、少なくとも1回は治験機器が施行された症例を安全性解析対象集団とする。ただし、医療機器 GCP 省令不遵守例は安全性解析対象集団から除外する。

### 10.1.2. 最大の解析対象集団

本治験に登録され、1回以上治験機器が施行され、有効性データがあるすべての被験者を最大の解析対象集団（以下、「FAS」という。）とする。ただし、ベースラインのデータが取得されなかった被験者及び、重大な治験実施計画書違反（同意未取得、等）の被験者については除外する。

### 10.1.3. 治験実施計画書に適合した対象集団

FAS から、治験方法や併用療法等、治験実施計画書の規定に対して、以下の重大な違反があった症例を除いた被験者集団（以下、「PPS」という。）とする。

選択基準違反、除外基準違反、併用禁止薬違反、併用禁止療法違反、80%未満の治療率

## 10.2. 目標症例数と設定根拠

50例（電気刺激群25例、シャム群25例）、50眼

※両目とも選択基準を満たし、除外基準に該当しない場合は右眼とする。

### 【設定根拠】

第II相試験（試験番号 K29001）の結果から、8週、10週、12週時点で、logMAR 視力の改善が認められた。この結果より、本治験の主要評価項目の24週の変化量を 0.1 log MAR、標準偏差 0.124（前値と後値の標準偏差を 0.16、前値と後値の相関を 0.7 と仮定）と想定した。

一方、新生血管を伴う加齢黄斑変性症の治験17から2年間で1.6文字（0.032logMAR）のプラセボ効果がシャム群で報告されている。シャム群におけるプラセボ効果も時間に対し、線形であることを仮定し本治験の主要評価の評価時点（24週）でのシャム群のプラセボ効果を ETDRS 0.4文字（0.008 logMAR）標準偏差に関しては電気刺激群と同じであることを想定した。シャム群においては、第II相試験（試験番号 K29001）の付随研究における自然経過の悪化（2013～2017年の logMAR 回帰式： $\log\text{MAR}=0.04709 \times \text{year} - 94.6037$ （ $p=0.002$ ））に比べれば改善されているもののベースラインからは若干悪化するような値（-0.008 logMAR）と仮定した。

以上より、電気刺激群 0.1 logMAR、Sham 群では -0.008 log MAR、共通の標準偏差を 0.124 と仮定し、有意水準  $\alpha$  を 0.05、検出力 80% の場合各群、22例、機器群とシャム群の両群を合わせて 44例が必要である。脱落率を 10%程度と想定し各群 25例、両群で 50例を目標症例数とする。

## 10.3. 症例の取り扱い

原則として登録された症例については、治験調整医師及び統計解析責任者が協議の上、症例の取り扱いを決定する。新たな問題が起こった場合の症例の取り扱いについても、治験調整医師及び統計解析責任者が、協議の上、決定する。症例の取り扱いについて、協議及び決定はすべて盲検下で実施され、開鍵前ま

1  
2  
3  
4  
5  
6  
7  
8  
9  
10  
11  
12  
13  
14  
15  
16  
17  
18  
19  
20  
21  
22  
23  
24  
25  
26  
27  
28  
29  
30  
31  
32  
33  
34  
35  
36  
37  
38  
39  
40  
41  
42  
43  
44  
45  
46  
47  
48  
49  
50  
51  
52  
53  
54  
55  
56  
57  
58  
59  
60

でに完了する。

#### 10.4. データの取り扱い

データ集計・解析時におけるデータの取り扱いについては、原則として以下に示すとおりとする。疑義が生じた場合は、統計専門家と治験調整医師が協議の上データ固定前に決定する。

欠測値に対しては補完を行わない。

協議及び決定はすべて盲検下で実施され、開鍵前までに完了する。

#### 10.5. 統計解析項目及び解析計画

すべての症例において治験機器の使用が終了し、データが固定された後に解析を行う。

有効性評価において、FAS 及び PPS における解析を行う。FAS と PPS が同じとみなせる集団の時は PPS の解析は実施しない。

主要評価項目、副次評価項目及び探索的評価項目の解析は評価眼を対象に行う。

統計解析の詳細はデータ固定前に別途作成する統計解析計画書に規定する。

##### <主要評価項目>

- 24 週時における logMAR 視力（矯正小数視力から換算）の 0 週からの変化量における電気刺激群のシャム群に対する優越性

##### <副次評価項目>

- 24 週時までの副次評価項目の変化量

##### <探索的評価項目>

- 48 週時までの副次評価項目の変化量
- 副次評価項目の 24 週時点を起点とした変化量
- 副次評価項目の視力の改善割合

##### <安全性評価項目>

- 有害事象の発現状況は、治療開始前、開始後 24 週間及び 24 週以後に発現した有害事象の時点ごとの有害事象の発現割合
- 治験機器と関連性のある有害事象、重篤な有害事象及び重症度別有害事象の発現割合を、発生状況に応じ算出する
- 自覚症状は時点ごとに評価された自覚症状（角膜炎、皮膚炎、前眼部・中間透光体、顔面神経、三叉神経、鼻への影響）の発生割合

##### 10.5.1. 被験者背景の解析

各解析対象集団における被験者背景データの分布及び要約統計量を算出する。名義変数については、カテゴリの頻度及び割合を示す。連続変数については要約統計量を算出する。

## 10.5.2. 安全性及び有効性の解析

### 10.5.2.1. 主たる解析

有効性の主要評価項目は、24 週時における logMAR 視力（矯正小数視力から換算）の 0 週からの変化量である。主たる解析はシャム群と電気刺激群の 24 週時における logMAR 視力変化量が等しいという帰無仮説の検定を実施する。各群の logMAR 視力の 24 週からの 0 週からの変化量（24 週-0 週）を動的割付の因子を調整因子として、共変量調整解析を行う。

### 10.5.2.2. 副次解析

本治験の主たる解析結果を補足する考察を行う目的で副次評価項目の解析を行う。副次評価項目の解析は原則主要評価項目と同様な手法を用いる。副次評価項目では 24 週までの複数時点をを用いた経時解析を実施するが多重性の調整は行わない。

### 10.5.2.3. 探索的解析

24 週以降、36 週及び 48 週のデータを含め探索的な解析を行う。探索解析では 24 週時点からの変化量を算出などの検討を行い、主要評価項目を含む副次評価項目における予後の検討を探索的に行う。

## 10.5.3. 安全性の解析

24 週までに生じた有害事象及び 24 週以後の安全性の評価項目について、発現割合および発現割合の 95 % 信頼区間を算出する。

## 10.6. データモニタリング委員会

本治験ではデータモニタリング委員会を設置する。データモニタリング委員会は治験責任医師と独立した機関として設立され、本治験とは独立した立場である 3 人以上の専門家による委員で構成される。データモニタリング委員会は、被験者の安全性を確保することを目的に、年一回程度、被験治療における有害事象発現率の比較、重篤な有害事象に関する詳細な検討等の安全性モニタリングを行う。ときにその結果を踏まえて有害事象のリスクを軽減する為に、組入れ基準の変更等の治験デザインの変更を勧告すること、あるいは治験の継続の可否を判断することもある。詳細は「データモニタリング委員会に関する標準業務手順書」に従う。

## 10.7. 最終解析

追跡期間終了後、データが得られ症例が固定された後に解析を行う。統計解析責任者が「解析報告書」をまとめ、治験調整医師及び治験責任医師に提出する。治験調整医師は解析報告書の内容を総括し、治験全体の結論、問題点、結果の解釈及び考察、今後の方針等を主として臨床的観点からまとめた「総括報告書」を作成し、治験責任医師の承認を得る。

## 11. 治験実施計画書の遵守及び逸脱

- 1) 治験責任医師又は治験分担医師は、本治験実施計画書を遵守して治験を実施する。
- 2) 治験責任医師又は治験分担医師は、治験実施計画書から逸脱した場合、すべての逸脱の詳細及び理由

を記録する。

- 3) 被験者の緊急の危機を回避するためその他医療上やむを得ない理由により実施計画書から逸脱した場合、治験責任医師は、逸脱の内容及びその理由を記載した文書を実施医療機関の長に直ちに提出するとともに、当該文書の内容を実施医療機関の長を経由して治験審査委員会に速やかに報告する。
- 4) 被験者が SARS-CoV-2 に感染した場合、濃厚接触者になった場合あるいは実施医療機関が治験の来院を中断した場合、来院治療及び検査が出来なくなる。このことは、SARS-CoV-2 に特化した状況に起因する治験実施計画書からの逸脱になることから、治験責任医師又は治験分担医師は SARS-CoV-2 に起因すると考えられる逸脱の概要を明確に記録する。

## 12. 治験実施計画書、症例報告書又は解析計画に関する変更

### 12.1. 治験実施計画書及び症例報告書の改訂

治験実施計画書及び症例報告書を改訂する場合には、以下の手順により行う。

- 1) 治験責任医師は、治験機器の品質、有効性及び安全性に関する事項、その他治験を適正に行うために重要な情報を知ったときは、必要に応じて当該治験実施計画書を改訂する。また、改訂の際には改訂履歴を作成し、それを保存する。
- 2) 治験責任医師は、必要に応じ治験実施計画書の改訂に併せて又は他の理由により症例報告書を改訂する。また、改訂の際には改訂履歴を作成し、それを保存する。
- 3) 治験責任医師は治験実施計画書改訂版及び症例報告書用紙改訂を速やかに実施医療機関の長に提出し、実施医療機関の長を経由して速やかに治験審査委員会の承認を得る。
- 4) 治験審査委員会の意見に基づく実施医療機関の長の指示が治験責任医師の許容できる範囲内で、治験実施計画書及び症例報告書用紙を修正する場合も同様の手順とする。

### 12.2. 統計解析計画の変更

統計解析責任者は、統計解析計画書の内容を変更した場合、変更内容をすべて本治験の統計解析報告書に記載する。なお、統計解析計画書の変更は、その経緯を記録に残す。

## 13. 治験の中止、中断又は終了

### 13.1. 治験全体での中止又は中断の基準

治験調整医師は、以下の情報が得られ、治験全体の続行が困難であると考えられる時には、治験責任医師と治験全体の中止又は中断について協議のうえ、決定する。

- 1) 治験機器に関する新たな安全性情報又は重篤な有害事象及び不具合情報が得られる等、治験の安全性確保が困難になった場合。
- 2) 実施医療機関が、重大な医療機器 GCP 省令違反、治験実施計画書からの重大な逸脱を行った場合。
- 3) その他、治験実施中に治験の中止・中断が必要と考えられる新たな情報が得られた場合。

### 13.2. 治験全体での中止又は中断する場合の手続き

治験調整医師は、他の治験責任医師との協議又はデータモニタリング委員会等への諮問により治験全体を中止又は中断する場合には、実施医療機関の長及び PMDA にその旨とその理由を詳細に速やかに文

書で通知する。また、治験機器施行中の被験者に対して速やかにその旨を伝え、適切な治療への変更等の適切な処理を行うものとする。

### 13.3. 個々の実施医療機関での治験の中止又は中断する場合の手続き

治験責任医師は、治験を中止又は中断した場合には、実施医療機関の長に速やかにその旨を文書で通知するとともに、中止又は中断について文書で詳細に説明する。

治験調整医師は、治験責任医師が治験を中止又は中断した旨を通知してきた場合には、中止又は中断について詳細に説明された文書により当該治験に関与するすべての治験責任医師及び PMDA に速やかに文書で通知する。

### 13.4. 治験の終了

治験責任医師は、治験終了後、実施医療機関の長に治験が終了した旨を文書で通知し、治験結果の概要を文書で報告する。

## 14. データマネジメント

### 14.1. データマネジメントの手順

データマネジメントに関する詳細な手順については、データマネジメント計画書に記載する。

### 14.2. データの収集

治験責任医師又は治験分担医師は、21 CFR Part 11、医療機器 GCP 省令及び ER/ES 指針の要件に対応した Electronic Data Capture（以下、「EDC」という。）を用いた症例報告書を作成する。治験責任医師又は治験分担医師は、症例報告書の記載内容の変更、修正又は追記に当たっては、症例報告書を作成した EDC 上でを行い、すべて電子情報として記録する。なお、治験責任医師は、治験分担医師が症例報告書を作成した場合並びに治験協力者が原資料（原データ）から症例報告書に転記した場合には、当該症例報告書が提出される前にその内容について点検し、問題がないことを確認する。治験責任医師は、最終的に電子症例報告書を電子媒体（例：CD-R 等）にて実施医療機関へ提供する。治験責任医師は、電子症例報告書の見読性、保存性を担保する。

EDC システムの使用にあたり、実施医療機関は EDC トレーニングを受講し、入力方法の詳細は別途入力マニュアルを参照する。

### 14.3. 症例報告書に直接記入され、かつ原資料（原データ）と解すべき資料の特定

- ・ 本治験においては、以下の文書などを原資料（原データ）とする。
- 1) 被験者の同意及び被験者への情報提供に関する記録、診療録、看護記録、臨床検査データ及び画像検査フィルム等症例報告書作成の基となった記録。なお、電子カルテに格納されたデータも原資料とみなす。
- 2) 治験機器施行に関する記録
- 3) 本治験に関連する指針上必要な治験に係る文書又は記録

1  
2  
3  
4  
5  
6  
7  
8  
9  
10  
11  
12  
13  
14  
15  
16  
17  
18  
19  
20  
21  
22  
23  
24  
25  
26  
27  
28  
29  
30  
31  
32  
33  
34  
35  
36  
37  
38  
39  
40  
41  
42  
43  
44  
45  
46  
47  
48  
49  
50  
51  
52  
53  
54  
55  
56  
57  
58  
59  
60

- ・ 症例報告書に記載されたデータのうち、以下に示す項目は症例報告書の記載をもって原資料（原データ）とする。ただし、診療録等に記載のある場合は、当該診療録等を原資料（原データ）とみなす。

- 1) 併用薬・併用療法の目的
- 2) 有害事象の程度、転帰（追跡調査時の結果を含む）、重篤度、治験機器との因果関係の判定及び判定根拠
- 3) 被験者の治験中止理由
- 4) 治験責任医師又は治験分担医師のコメント

## 15. 記録の保存

### 15.1. 実施医療機関による記録の保存

医療機器 GCP 省令に規定される実施医療機関において保存すべき治験に係る文書又は記録は、病院長が次の日のうちいずれかの遅い日までの期間保存する。

- 1) 当該被験機器の当該効能・効果に係る製造販売承認日（開発が中止された場合には、開発中止が決定されてから 3 年が経過した日）
- 2) 治験の中止又は終了後 3 年が経過した日

治験責任医師は、実施医療機関又は治験審査委員会が保存すべき記録について保存が不要となった場合、実施医療機関に通知する。

### 15.2. 治験責任医師による記録の保存

医療機器 GCP 省令に規定される治験責任医師が保存すべき治験に係る文書又は記録は、適切と判断される保管場所において、次のうちいずれか遅い日までの期間保存する。

- 1) 当該被験機器の当該効能・効果に係る製造販売承認日から 5 年が経過した日（開発が中止された場合には開発中止が決定された日から 3 年が経過した日）。ただし、薬機法の規定により承認後の再審査を受けなければならない医療機器で、かつ再審査が終了するまでの期間が 5 年を超えるものについては、再審査が終了する日。
- 2) 治験の中止又は終了後 3 年が経過した日。

## 16. 原資料の直接閲覧

実施医療機関の長及び治験責任医師は、モニタリング、監査及び治験審査委員会又は規制当局による調査の際に、原資料等すべての記録を閲覧できることを保証する。治験が適切に実施されていること及びデータの信頼性が十分に確保されていることを確認する。直接閲覧の方法、実施時期についてはモニタリング計画書に別途定める。

## 17. 治験の品質管理及び品質保証

### 17.1. 品質管理

- 1) 本治験実施計画書からの逸脱した行為があった場合は、治験責任医師又は治験分担医師は、本実施計画書に定めるところに従う。
- 2) 治験責任又は治験分担医師は、症例報告書を本治験実施計画書に従って作成する。

- 3) 治験責任医師は、症例報告書に記載されたすべてのデータ及びその他の記録が正確及び完全であること確認する。
- 4) 症例報告書に記載されたデータのうち、原資料と何らかの矛盾がある場合は、治験責任医師はその理由を説明する記録を作成・保存する。
- 5) 治験調整医師は、当該モニタリングの対象となる実施医療機関において当該治験に従事していない者をモニターとして指名し、治験審査委員会の審査を経たモニタリング手順書に従いモニタリングを実施させる。モニターは、下記の事項を確認する。
  - － 被験者の人権、安全及び福祉が保護されている
  - － 医療機器 GCP 省令、最新の治験実施計画書及び当該治験に係る手順書を遵守して実施している
  - － 治験責任医師又は治験分担医師から報告されたデータ等が正確かつ完全で原資料等の治験関連記録と照らし検証できる
- 6) データマネジメント責任者は、別途定めた標準業務手順書に従ってデータマネジメント計画を立案し、データの取扱い各段階で品質管理を行い、その品質を確保する。

## 17.2. 品質保証

治験調整医師は、監査に関する計画書及び業務に関する手順書を作成し、治験審査委員会の意見を踏まえて、当該計画書及び手順書に従って監査を実施させる。なお、監査担当者は、当該監査に係る治験機器の開発を担当する者でなく、また、当該監査に係る実施医療機関において当該治験の実施（その準備及び管理を含む。）及びモニタリングに従事していない者とする。

## 18. 倫理及び GCP

本治験の実施に際しては、「ヘルシンキ宣言（2013 年フォルタレザ総会改訂）」、薬機法及び医療機器 GCP 省令に従って行われる。また、本治験実施計画書及び当該治験に係る手順書を遵守して施行される。

また、治験責任医師又は治験分担医師は、被験者の選定にあたって、人権保護の観点ならびに選択基準と除外基準に基づいて被験者の健康状態、症状、年齢、性別、同意能力、治験責任医師等との依存関係、他の治験を含む臨床試験への参加の有無を十分に考慮したうえで、治験への参加を求めることの適否を慎重に検討する。

## 19. 治験審査委員会

本治験の実施に先立ち、実施医療機関の治験審査委員会は、本治験の倫理的、科学的及び医学的妥当性を審査する。本治験は、治験審査委員会の承認を得た後に実施する。治験審査委員会の審議結果が「修正の上で承認する」であった場合には、審議結果に基づいて実施計画書又は症例報告書、同意説明文書等を修正し承認した後、本治験を実施する。また、治験審査委員会は少なくとも 1 年に 1 回以上の頻度で本治験が適切に実施されているか否かを継続的に審査する。

## 20. 健康被害補償及び保険

本治験に参加した結果として被験者に健康被害が生じた場合、治験責任医師はその治療に関する医療体制の提供等必要かつ適切な処置を行う。ただし、本治験では自己負担分の医療費及び医療手当は支払わ



れない。本治験に起因する健康被害により生じた賠償責任、補償責任への対応として、治験責任医師、治験分担医師、実施医療機関及び治験調整委員会等本治験に携わる者は医師主導治験保険に加入する。

## 21. 治験に関する費用負担

本治験に係わる費用は下記のとおりとする。

- 1) 本治験で使用される治験機器は有限会社メイヨーより提供される。
- 2) 被験者の負担軽減費の支払いは、各実施医療機関が別途定める規程に従う。

## 22. 研究資金及び利益相反

本研究は、国立研究開発法人日本医療研究開発機構（AMED）医療機器開発推進研究事業の以下の研究によって実施する。

<事業名>医療機器開発推進研究事業

<プログラム名>高齢者向けまたは在宅医療の推進に資する革新的医療機器の医師主導治験・臨床研究

有限会社メイヨーは、医療機器 GCP 省令上の治験機器に関する情報は提供するが、治験の実施、解析、報告に係わることはない。

本治験の利害関係については、各実施医療機関が別途定める規程に従い適切に審議する。

## 23. 治験のデータベース登録

本治験は、最初の被験者からの同意取得前に臨床研究実施計画・研究概要公開システム（jRCT）

(<https://jrct.niph.go.jp/>) に登録を行う。

## 24. 付録

- ・ VFQ-25

## 25. 治験実施体制

本治験の実施体制は、別紙 1 参照

## 26. SARS-CoV-2 流行時における治験手順の一時的な変更

本治験実施時において SARS-CoV-2 が流行した場合、実施医療機関及び被験者に前例のない困難や問題が生じる可能性がある。過去の治験上での経験及び起こりうる危機的状況を鑑み、治療の継続及び被験者の安全性を確保しながら継続してデータを収集する治験上可能な変更について別紙 2 に記載する。

別紙 2 は暫定的な処置であり、SARS-CoV-2 の流行状況等を鑑み適宜変更する。

## 27. 参考資料・文献リスト

1. 三宅養三, 柳田和夫, 他: EER (Electrically Evoked Response) の臨床応用IV視神経疾患のEER解析. 日眼会誌 84: 2047-52, 1980.
2. Morimoto T, Miyoshi T, et al: Electrical stimulation enhances the survival of axotomized retinal ganglion cells in vivo. *Neuroreport* 13: 227-30, 2002.
3. Okazaki Y, Morimoto T, et al: Parameters of optic nerve electrical stimulation affecting neuroprotection of axotomized retinal ganglion cells in adult rats. *Neurosci Res* 61: 129-35, 2008.
4. Morimoto T, et al. Transcorneal electrical stimulation rescues axotomized retinal ganglion cells by activating endogenous retinal IGF-1 system. *Invest Ophthalmol Vis Sci.* 46: 2147-2155, 2005.
5. Sato T, et al: Direct effect of electrical stimulation on induction of brain-derived neurotrophic factor from cultured retinal Muller cells. *Invest Ophthalmol Vis Sci.* 49: 4641-464, 2008.
6. Ni YQ, et al.: Neuroprotective effect of transcorneal electrical stimulation on light-induced photoreceptor degeneration. *Exp Neurol.* 219: 439-452, 2009.
7. Ciavatta VT, et al.: Growth factor expression following implantation of microphotodiode arrays in RCS rats. *Invest Ophthalmol Vis Sci.* 47:3177, 2006.
8. Zhou WT, et al.: Electrical stimulation ameliorates light-induced photoreceptor degeneration in vitro via suppressing the proinflammatory effect of microglia and enhancing the neurotrophic potential of Muller cells. *Exp Neurol.* 238: 192-208, 2012.
9. Wang X, et al.: Neuroprotective effect of transcorneal electrical stimulation on ischemic damage in the rat retina. *Exp Eye Res.* 93: 753-760, 2011.
10. Kanamoto T, et al.: Proteomic study of retinal proteins associated with transcorneal electric stimulation in rats. *J Ophthalmol.* 2015: 1-6, 2015.
11. Fu L, et al.: Transcorneal electrical stimulation inhibits retinal microglial activation and enhances retinal ganglion cell survival after acute ocular hypertensive injury. *Transl Vis Sci Technol.* 7: 1-11, 2018.
12. Yin H, et al.: Transcorneal electrical stimulation promotes survival of retinal ganglion cells after optic nerve transection in rats accompanied by reduced microglial activation and TNF- $\alpha$  expression. *Brain Res.* 1650: 10-20, 2016.
13. Morimoto T, Fukui T, Matsushita K, Okawa Y, Shimojyo H, Kusaka S, Tano Y, Fujikado T: Evaluation of residual retinal function by pupillary constrictions and phosphenes using transcorneal electrical stimulation in patients with retinal degeneration. *Graefes Arch Clin Exp Ophthalmol.* 244: 1283-1292, 2006.
14. Schatz A, Rock T, et al. Transcorneal electrical stimulation for patients with retinitis pigmentosa: a prospective, randomized, sham-controlled exploratory study. *Invest Ophthalmol Vis Sci.* 52: 4485-4496, 2011.
15. Schatz A, Pach J, et al. Transcorneal electrical stimulation for patients with retinitis pigmentosa: a prospective, randomized, sham-controlled follow-up study over 1 year. *Invest Ophthalmol Vis Sci.* 58: 257-269, 2017.
16. Bittner AK, et al. Longevity of visual improvements following transcorneal electrical stimulation and efficacy of retreatment in three individuals with retinitis pigmentosa. *Graefes Arch Clin Exp Ophthalmol.* 256: 299-306, 2018.
17. Rosenfeld P, Brown D, et al.: Ranibizumab for neovascular age-related macular degeneration. *N Engl J Med.*

1  
2  
3  
4  
5  
6  
7  
8  
9  
10  
11  
12  
13  
14  
15  
16  
17  
18  
19  
20  
21  
22  
23  
24  
25  
26  
27  
28  
29  
30  
31  
32  
33  
34  
35  
36  
37  
38  
39  
40  
41  
42  
43  
44  
45  
46  
47  
48  
49  
50  
51  
52  
53  
54  
55  
56  
57  
58  
59  
60

355: 1419 – 1431, 2006.

For peer review only

治験実施計画書番号： CCRC1804

(第 1.0 版)

作成日：2021 年 4 月 1 日

よくお読みください

患者さんへ

網膜色素変性を対象とした経皮膚電気刺激装置の  
有効性及び安全性を検証するシャム対照二重遮蔽比較試験  
～説明および同意文書～

この冊子には、経皮膚電気刺激装置という医療機器の、効果や安全性を確かめるための臨床試験（治験）についての詳しい説明が書かれています。

この冊子をよくお読みになり、この治験の目的や方法、医療機器について十分にご理解されたうえで、治験に参加されるか否かを決めてください。担当医師の説明やこの説明文書の中で、わからないことや心配なことなどがありましたら、どんなことでも遠慮なくお尋ねください。

## 目次

|     |                             |    |
|-----|-----------------------------|----|
| 1.  | 治験とは？                       | 3  |
| 2.  | 網膜色素変性と経皮膚電気刺激装置について        | 4  |
| 3.  | 治験の目的                       | 7  |
| 4.  | この治験の方法                     | 7  |
| 5.  | この治験の参加予定期間                 | 17 |
| 6.  | 予定人数                        | 17 |
| 7.  | 利益と不利益                      | 17 |
| 8.  | 他の治療法                       | 19 |
| 9.  | 治験への参加を中止する場合について           | 19 |
| 10. | 新たに重要な情報が得られた場合について         | 20 |
| 11. | 治験に関連した健康被害の治療について          | 20 |
| 12. | 治験に参加された場合の費用について           | 20 |
| 13. | カルテなどの医療記録の閲覧と参加者の秘密の保全について | 21 |
| 14. | 知的財産権と利益相反について              | 23 |
| 15. | 治験に参加いただくことは自由です            | 23 |
| 16. | 患者さんに守っていただきたいことについて        | 23 |
| 17. | 治験を審査する委員会                  | 24 |
| 18. | 治験に関する相談窓口                  | 26 |

治験実施計画書番号： CCRC1804

(第 1.0 版)

作成日：2021 年 4 月 1 日

## 1. 治験とは？

新しい医薬品・医療機器が世の中に出て、多くの患者さんに使われるためには、国から承認を得ることが必要とされています。そのため、その効果と安全性を何段階にもわたって慎重に調べます。まずは動物実験などによって医療機器の効果と安全性が確認されます。その後、健康な方や患者さんに使っていただき、効果や安全性を詳しく調べます。このように、開発の最終段階において、人を対象に効果や安全性を確かめ、厚生労働省に「医薬品・医療機器」として認めもらうため、申請の資料を集めることを目的とした試験を「治験」、その治験で使われる機器を「治験機器」と呼んでいます。

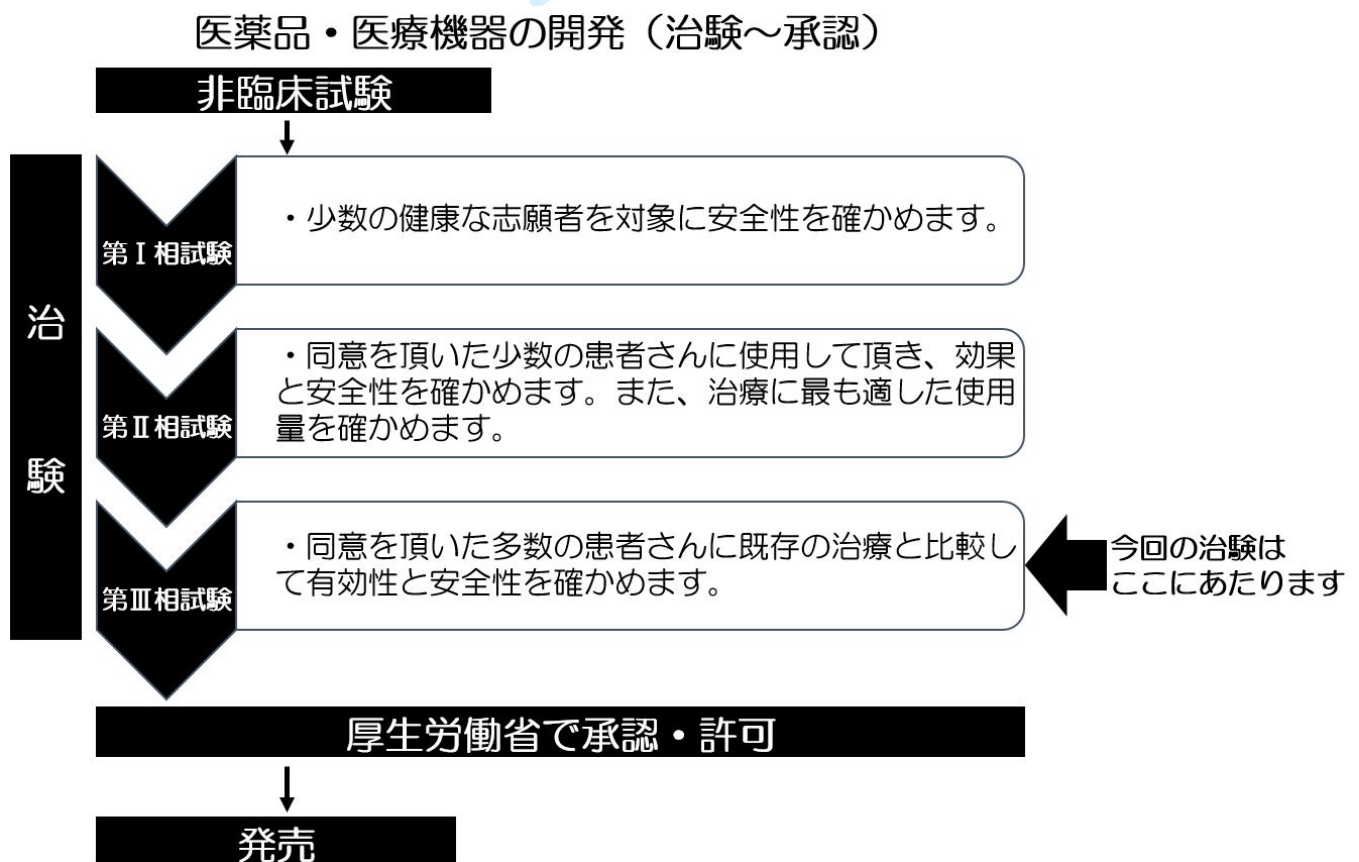

1  
2  
3  
4  
5  
6 治験は、一般の治療と異なり、研究的な側面があります。そのため、治験は参  
7  
8 加された方の安全や人権を守るために、「医薬品医療機器法」という法律と厚生  
9  
10 労働省が定めた「医療機器の臨床試験の実施の基準に関する省令（GCP）」を守  
11  
12 りながら行われます。また、当院の治験審査委員会（治験について審査する委員  
13  
14 会）で、この治験の内容に問題がないか、患者さんの人権が十分に守られている  
15  
16 か事前に審議されたうえで、治験の実施が認められています。

## 21 22 1-1 医師主導治験とは？

23  
24  
25 今回説明をさせていただく臨床試験は、「医師主導治験」と呼ばれるもので、  
26  
27 実際の診療に携わる医師が医学的必要性・重要性を検討の上、立案・計画して行  
28  
29 うものです。これまで日本では、医療機器を開発するための治験は、医療機器を  
30  
31 開発する会社のみが実施することができました。医師は医療機器を開発する会  
32  
33 社から依頼を受けて治験をする立場であり、外国での臨床試験の結果などから  
34  
35 「この患者さんにこの機器を使ったら効果があるのではないかと考えても、自  
36  
37 ら治験を計画して実施することは出来ませんでした。しかし、2002 年に法律  
38  
39 （薬事法）が改められ、医学的に必要と考えられる機器について、医師が自ら治  
40  
41 験を計画して実施することが出来るようになりました。

## 46 47 2. 網膜色素変性と経皮膚電気刺激装置について

48  
49 〈あなたの病気について〉

50  
51  
52 あなたの病気は、「網膜色素変性(もうまくしきそへんせい)」と診断されてい  
53  
54 ます。網膜色素変性は、目の奥(眼底)で光を感じる組織である網膜に異常がみ  
55  
56 られる病気で、4000~8000 人に 1 人の割合で起こるといわれています。眼  
57  
58  
59  
60

治験実施計画書番号： CCRC1804

(第 1.0 版)

作成日：2021 年 4 月 1 日

底の網膜で眼の中に入った光を感じ、その情報が脳へ送られて映像になります。網膜には 1 億数千万個もの視細胞という光を感知する細胞が集まって構成されています。網膜色素変性はこの視細胞が、遺伝的な要因により機能しなくなってしまう病気です。視細胞が働かなくなった部分は光を感じとれず、映像になりません。

最初に現れる症状は、夜や薄暗い屋内でものが見えにくくなる夜盲(やもう)です。その後、視野(しや)狭窄(きょうさく)が少しずつ進行し、見える範囲が周辺部分から中心に向かい狭くなっていきます。最近では夜でも明るい所が多いので、夜盲ではなく視野狭窄によって発病に気づく人も増えています。続いて視力低下を自覚するようになります。進行性の病気ですが、病状の進行速度には大きな個人差がみられます。症状の進行に伴う視野の狭窄を図 1 に示します。

図 1 網膜色素変性患者さんの視野

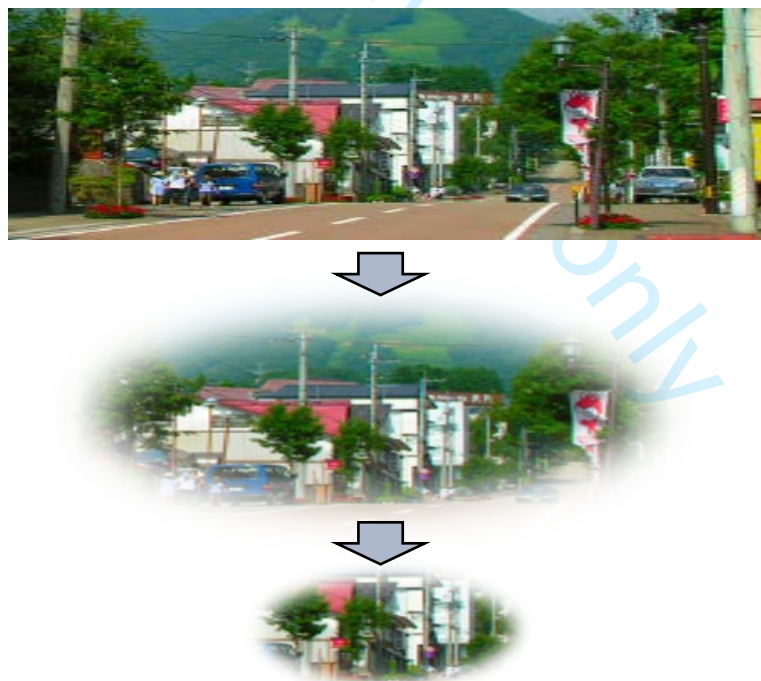

一番上は健康な人の視野。病気の進行と共に視野狭窄が進行し(中段及び下段)、視力も低下してきます。



1  
2  
3  
4  
5  
6 網膜の視覚機能がある細胞には二種類があり、暗い所での物の見え方に関係  
7  
8 している細胞（杆体細胞<sup>かんたいさいぼう</sup>といいます）と明るい所で細かいものを見分けたり、  
9  
10 色を識別する能力に優れていて、おもに視力に関係している細胞（錐体細胞<sup>すいたさいぼう</sup>と  
11  
12 います）です。網膜色素変性では、まず杆体細胞の機能が低下するため、夜盲  
13  
14 や視野狭窄が最初の症状になり、さらに病気が進むと錐体細胞に影響し、視力が  
15  
16 低下してきます。

### 21 22 〈あなたの病気の治療法について〉

23  
24 あなたの病気（網膜色素変性）に対しては、暗順応<sup>あんじゅんのう</sup>改善薬（アダプチノール）  
25  
26 や血流改善薬（ニバジール）、ビタミン剤、酸素が高い濃度になる部屋での一定  
27  
28 時間の滞在などが、対症療法（たいしょうりょうほう）的に処方されることもあり  
29  
30 ます。ただ、これらの薬や治療方法が病気の進行を確実に遅らせているという証  
31  
32 拠は、今のところ得られていません。

33  
34 経角膜電気刺激は、コンタクトレンズ型電極を黒目（角膜）の上、もう一方の  
35  
36 電極をこめかみに置き、電気刺激装置から電極を通して電気刺激をする方法で、  
37  
38 近年、ラットやウサギを用いた動物実験において、網膜の視細胞に対して神経保  
39  
40 護的に働くことがわかってきております。そしてこの電気刺激は、ある条件のも  
41  
42 と、繰り返し行うことで効果を得られることが分かってきています。実際にヨー  
43  
44 ロッパでは、同様の機序を持つ医療機器が認証を得て臨床使用されていますが、  
45  
46 日本国内ではまだ承認されておらず、使用することができません。

47  
48 また、電極を黒目（角膜）上に置くことで、角膜に傷がついたり、ドライアイ  
49  
50 になったり、不快感を生じることがあります。それを避けるため、今回は角膜上  
51  
52 ではなく皮膚に電極を貼り付けることで電気刺激を行います。

治験実施計画書番号： CCRC1804

(第 1.0 版)

作成日：2021 年 4 月 1 日

日本国内では 10 人の網膜色素変性の患者さんに参加頂いた第 II 相試験が終了しています。2 週間毎に 6 回 1 ミリアンペアによる電気刺激を網膜に与えることで、視力と視野(見える範囲)が治療前と比べて改善した結果を得ています。

さらに、患者さんの過去 5 年間のデータをもとに治療を行わなかった場合の視力の推移と、実際に治療を行った視力の推移を比較したところ、治療による視力改善によって長期的に視力を維持する効果が認められました。

また、電気刺激を行ったことによる身体への悪影響は認められませんでした。

### 3. 治験の目的

この研究の目的は、網膜色素変性の患者さんに対して経皮膚電気刺激療法を実施した際の、治療後の視機能への効果と安全性を調べることです。

### 4. この治験の方法

経皮膚電気刺激治療は、<sup>ひたい</sup>額と両眼の下の皮膚に電極をつけて、電気刺激装置から電極を通して電気刺激をする方法です。本治験では皮膚に電極を装着して刺激するため、角膜などの眼球への障害は無く、低侵襲で眼にやさしい治療です。この治験では、実際に電気刺激を行うグループと、電気刺激を行わないグループに 1:1 で分けて実施します。電気刺激を行わないグループをシャム群と呼びます。

グループ分けは、「無作為化(ランダム化)割り付け」という方法で行います。コンピューターで作成した乱数表を使って、ランダムにグループ分けをする方法です。どちらのグループに入るかは、あなたも担当医師も選ぶことも知ることできません。そのため、あなたが必ずしも希望するグループに入れない可能性

があります。

ご自分がどちらのグループに割り付けられたかが分かっていると、思い込みによって電気刺激の効き方が変わってしまうことがあります。このような思い込みの影響を取り除くため、どちらのグループに割り付けられたかを、あなたにはお知らせせずに治験を行います。あなたの担当医師もあなたがどちらのグループなのかを知ることができませんが、あなたの体調変化に担当医師が責任をもって対応します。

電気刺激を行うグループも行わないグループも図 2 の様に電極を 30 分間付けて頂きます。電気刺激は 1 ミリアンペアの電流を 30 分間流します。安全性の証明された範囲内の電流値ですので、危険性はほとんどありません。これらの療法は 2 週間ごとに 12 回実施します。

どちらのグループの方にも治験期間中に視覚機能に関するアンケートを計 4 回実施します。

シャム群とは・・・シャムとは見せかけの電気刺激のことです。電極を貼りますが電気刺激は行いません。思い込みによる影響を取り除き、効果や安全性を正しく判断するため世界的に認められている科学的な方法です。

#### < 刺激条件 >

電流強度：1 ミリアンペアあるいは 0 ミリアンペア

パルス幅：10 ミリセカンド/相 双極性あるいは無し

刺激頻度：20 ヘルツあるいは無し

治療時間：30 分

\* 家庭用の低周波電気によるマッサージ機器の最大電流は

20 ミリアンペアです。

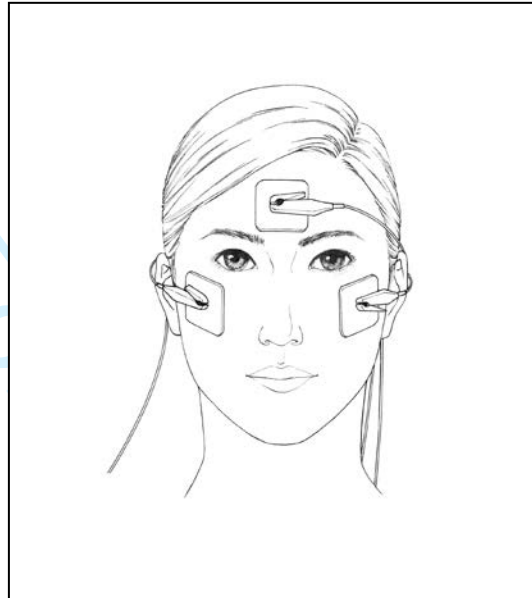

図 2 皮膚電極の装着例

〈この治験に参加出来る方・出来ない方〉

以下のすべてに該当する方が治験に参加できます。ただし、2)、3) に関して、片眼（評価眼）が以下の基準を満たすこと（両目の場合は、右眼）。

- 1) 年齢が 20 歳以上、80 歳未満
- 2) 小数視力（通常の視力検査のことです）が 0.1 以上、0.7 以下
- 3) 視野がある程度ある方
- 4) 本治験の十分な説明を受け、ご自分の意思で同意書に署名される方
- 5) 2 週おきに 24 週間、その後 36 週目と 48 週目に来院可能な方
- 6) 適切な避妊を行うことができる方

また、上記に該当する方でも、以下のいずれかに該当する方は治験に参加できません。ただし、2)、5)、6) に関しては評価する眼が以下のいずれかに該当する方は参加できません。

- 1) 眼の病気に対する電気刺激治療を受けた方

- 2) 3 か月以内に白内障などの眼の中の手術を受けた方
- 3) 網膜色素変性用のお薬（ウノプロストン点眼薬、カルシウム拮抗薬、暗順  
 応改善薬）の使う量もしくは使い方を約 1 か月以内に変えた方
- 4) 治験期間中に使用する予定のお薬（散瞳薬、点眼麻酔薬など）に対し、ア  
 レルギーを起こしたことがある方
- 5) 網膜色素変性の他に以下の病気が眼にあると診断された方
- 硝子体黄斑牽引症候群、黄斑浮腫、黄斑前膜、後部ぶどう腫を伴う強  
 度近視のある黄斑病変、糖尿病網膜症、外眼部の炎症、感染症、重  
 度のドライアイ、網膜中心動脈閉塞症、後部虚血性視神経症、眼の  
 水晶体が茶色より濃く濁った核白内障、視力に重大な影響を及ぼすよ  
 うな前囊下及び後囊下白内障、後発白内障、視神経疾患
- 6) 最近3年間の視力検査などのデータに変化のない方
- 7) ペースメーカーもしくは除細動器が植え込まれている方
- 8) 悪性腫瘍と診断され治療中もしくは治療終了後5年以内の方
- 9) 認知症、神経疾患と診断され治療中の方
- 10) 糖尿病のコントロールが悪い方、血糖値が高い（HbA1cが10%  
 を超えている）方
- 11) 高血圧の治療を行っているが血圧が高い（最高血圧が180 mmHg以  
 上、かつ/又は、最低血圧が110 mmHg以上）方
- 12) 肝臓及び腎臓の機能に障害がある方
- 肝臓から出る酵素のAST（GOT）、かつ/又は、ALT（GPT）が施設  
 基準値の3倍を超える方

治験実施計画書番号： CCRC1804

(第 1.0 版)

作成日：2021 年 4 月 1 日

- 腎臓の機能を知る指標の血清クレアチニンが施設基準値の 1.5 倍を超える方

13) 妊娠、授乳中（授乳を中止する場合も含む）又は本治験中に妊娠を希望している方

治験参加にご同意いただいてから、治療前の視力検査、眼圧測定、眼底検査などの検査を行います。治療開始後は 2 週毎に、24 週間（約 6 か月間）の通院による治療を受けて頂き、その後 12 週間毎に 2 回通院して頂きます。通院時に行う検査としては、視力検査、眼圧測定、眼底検査、視野検査、などがあります。

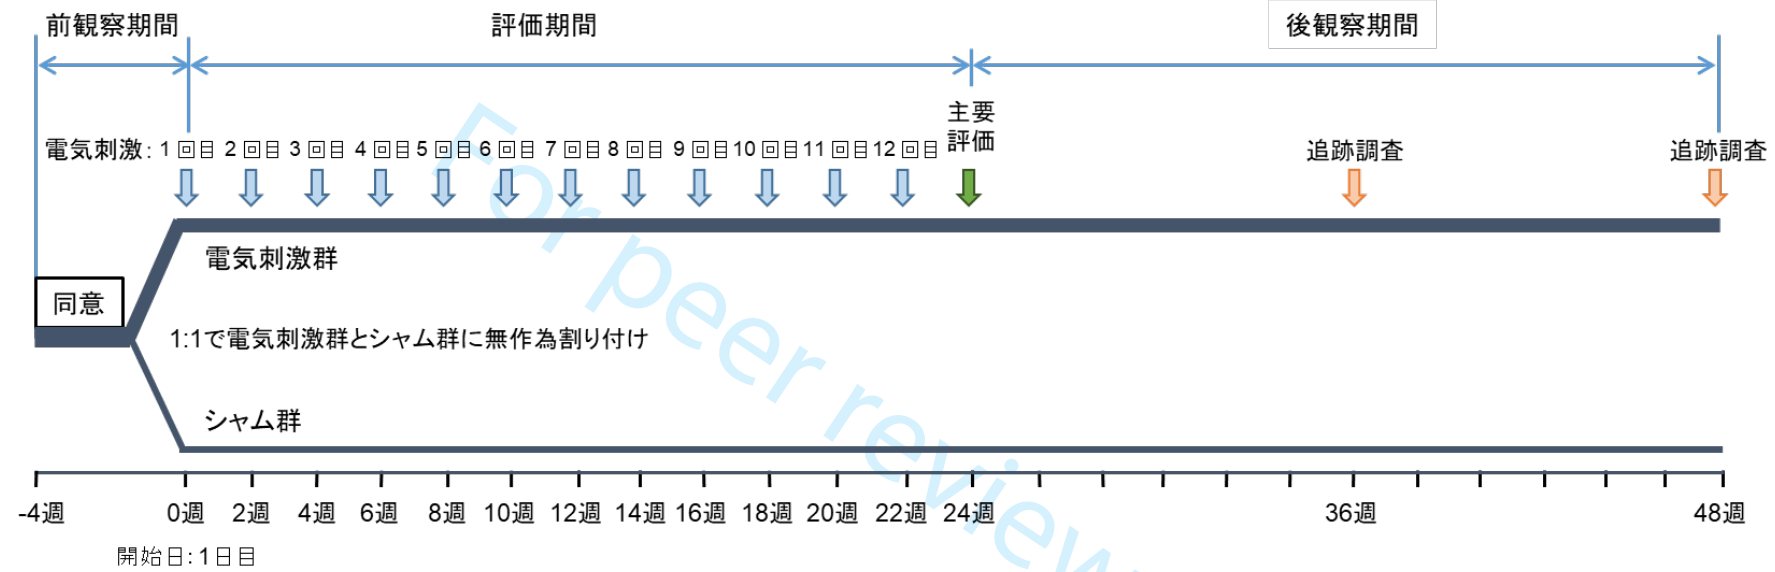

- ↓ (blue) : 通院
- ↓ (green) : 治療効果を見る通院日
- ↓ (orange) : 追跡調査のための通院日

治験実施計画書番号：CCRC1804

(第 1.0 版)

作成日：2021 年 4 月 1 日

## 検査スケジュール

この治験では、次項の表 1.に示されている検査を行います。また、この治験の検査項目及び検査頻度は通常の治療の際に行う検査項目及び検査頻度とほぼ変わらないため、治験に参加したことにより通院の負担が極端に多くなるということはありません。

新型コロナウイルス感染症の影響（ご自身の感染、濃厚接触者と判断される、治験実施施設の外来が閉鎖等）で来院が出来なくなった場合でも治験は継続いたしますので、担当医師又は治験コーディネーターにご連絡下さい。次の来院等のスケジュールについてご相談させていただきます。

また、スクリーニング検査期間に最近 3 年間であなたの見えかたに変化がなかったかどうかを以前受診されていた眼科に確認することがあります。

効果に関する眼の検査（logMAR 視力；矯正小数視力、ETDRS 視力、静的視野検査 10-2 プログラム、静的視野検査 エスターマンテスト、光干渉断層計；網膜の検査）は片眼（評価眼）にのみ実施しますが、安全性に関する眼の検査（細隙灯検査、眼圧・眼底検査）は両眼に実施します。







1  
2  
3  
4  
5  
6 なお、本治験に関わるデータは、同意取得前のデータも使用することがありま  
7  
8 す。

9  
10 <表 1.の注釈説明>

- 11  
12 a) 自覚症状は経皮膚電気刺激治療実施前後に実施します。36 週目及び 48  
13 週目ではその間の体調の変化に関しましてもお聞きします。  
14  
15 b) 血圧はあなたがこの治験に入れるかどうかの検査（スクリーニング検査）時  
16 に測定し、治験期間中は病院に来られた時に必要に応じて測定します。  
17  
18 c) 臨床検査はあなたの全身状態の確認のため 11 ミリリットル程度採血して実  
19 施します。検査項目は、一般的な健康診断時の項目（ALT(GPT)、AST(GOT)、  
20 ALP、総ビリルビン、尿素窒素（BUN）、血清クレアチニン、<sup>ヘモグロビンエーワンシー</sup>Hb A1c  
21 、赤血球、白血球、ヘモグロビン、血小板）です。  
22  
23 d) 眼鏡を掛けての視力測定を実施します。測定値から logMAR 視力を算出しま  
24 す。  
25  
26 e) スクリーニング検査で、静的視野検査の計測値で信頼性が確認できなかった  
27 場合には、再測定する場合があります。  
28  
29 f) 光干渉断層計（網膜の検査）と眼底検査は散瞳してから実施します。  
30  
31 g) スクリーニング検査期間及び治療開始後 12,24,48 週間目あるいは治験中  
32 止時に視覚機能に関するアンケート（NEI VFQ 25 コンポ 9）にお答えい  
33 ただきます。アンケート用紙をお渡しいたしますので、ご自身で記載いた  
34 だき担当医師又は治験コーディネーターにお渡してください。  
35  
36 h) 妊娠可能な女性のみ尿中 hCG 検査を実施します。  
37  
38 i) 有害事象とは副作用など好ましくないすべての事象のことです。治験治療と  
39 の因果関係は問いません。  
40  
41 j) スクリーニング検査は複数日に分けて実施することも可能です。  
42  
43  
44  
45  
46  
47  
48  
49  
50  
51  
52  
53  
54  
55  
56  
57  
58  
59  
60

治験実施計画書番号： CCRC1804

(第 1.0 版)

作成日：2021 年 4 月 1 日

あなたが他の病院に通院されている場合は、その病院名と病名、使用しているお薬をお知らせ下さい。また、薬局等で購入して使用しているお薬がある場合もお知らせ下さい。これらは、治験を安全に行うために大切なことです。また、あなたが他の病院に通院されている場合は、この治験に参加していることをその病院にお知らせすることがありますので、ご了解下さい。

## 5. この治験の参加予定期間

この治験の参加予定期間は、前観察期間（31日間）、治療期間（24週間）及び後観察期間（24週間）の合計約12ヶ月となります。

また、この治験を行う期間は、2021年4月～2023年3月です。患者さんへのご案内は、2021年4月～2022年3月まで行います。

## 6. 予定人数

この治験は、日本全国で行われ、合計50名の網膜色素変性の患者さんに参加していただく予定です。

## 7. 利益と不利益

＜予測される利益と不利益＞

### 1) 利益（効果など）について

この治療を行うことによって、錐体細胞死による視機能の障害の進行速度を緩徐にすることが期待できます。あなたがこの治験に参加する事で得られた情報が将来的に網膜色素変性症の患者さんの助けになる可能性があります。しか

し、あなた自身が何らかの利益を得られる保証はありません。

## 2) 不利益（副作用など）について

以下のような不利益や副作用が考えられます。まず、治療を行ったにもかかわらず十分な効果が得られない場合があります。電気刺激ではとても少ない量の電流を流します。人によっては電極装着部位にピリピリとしたわずかな刺激を感じたり、視界の中に疑似光覚（フォスフェンとも呼びます）と呼ばれる光の波（太陽やストロボなど強い光を見た後に生じる光の残像の様なもの）を感じたりする方がいます。電気刺激を終了するといずれも感じなくなります。

今回の治験では、安全性の証明された範囲内の電流を流しますので、電気刺激自体の合併症が生じる可能性は非常に低いと推測されますが、本治験で使用する治療機器は治験機器提供者（有限会社メイヨー）と共同で新たに開発・作製したものであるため、眼及び眼周辺の器官に対する影響は厳密には確定していません。そのため眼及び眼周辺の器官において有害事象（何らかの症状）が発生する可能性は否定できません。予測される有害事象としては、電極装着部位に一致した皮膚の炎症を生じる可能性があります。軽度の炎症でしたら自然に治りますが、万が一重度の炎症を生じた場合には、適切な治療を行います。

治験に入って頂くための臨床検査を実施する際、採血を実施します。採血時に注射針をさすため、チクッと痛みを感じます。また、止血が不十分だと内出血を起こすことがありますが、その際は自然に吸収されます。

この治験ではシャム群を設定しております。シャム群の治療になった場合も診察や検査も電気刺激を受けられる方と同様に通院していただきます。

治験実施計画書番号： CCRC1804

(第 1.0 版)

作成日：2021 年 4 月 1 日

## 8. 他の治療法

網膜色素変性という病気は、現在有効な治療法がありません。これまでと同様に通院していただき、その時の視機能を最大限活用できるよう支援をします。眼の合併症に関しても、適切に治療いたします。

## 9. 治験への参加を中止する場合について

あなたに治験参加の同意をいただいた後でも、この治験で事前に決められている基準に合わないことが判った場合には、治験への参加をお断りしたり、治験を中止することがありますのでご了承ください。

治験機器治療を開始した後に以下に該当することがわかった場合には、この治験への参加を中止させていただきますのでご了承ください。

- ・ 好ましくない症状などが発現し、治験機器の使用を中止すべきであると、担当医師が判断した場合
- ・ 病気の状態が変化（悪化）し、この治験を続けることが困難であると、担当医師が判断した場合
- ・ この治験で使用が禁止されている薬や療法を行った場合や行わざるを得なくなった場合
- ・ 転院や引越しなどにより、規定の通院を続けられない場合
- ・ その他、担当医師が治験を中止すべきであると判断した場合

また、これらの他に、治験の安全性に重大な影響があると考えられる情報が得られた場合など、治験を中止・中断させていただく場合もあります。治験を中止した場合にはその理由を説明させていただき、健康上に問題がないかを確認さ

せていただきます。

## 10. 新たに重要な情報が得られた場合について

この治験の参加の継続について、あなたの意思に影響を与える可能性がある  
と判断される、重要な有効性や安全性等に関する新しい情報が得られた場合に  
は、速やかにお知らせします。その場合、引き続き治験に参加するかどうか、改  
めて判断していただくことになります。

### 11. 治験に関連した健康被害の治療について

この治験は、科学的に計画され慎重に行われますが、あなたが治験参加に同意  
された後、治験中又は治験が終わった後に、この治験が原因となった健康障害が  
生じたときには、担当医師又は治験コーディネーターまでお知らせください。そ  
の時点で最善と思われる処置を行い、適切に対処した上で補償します。その際の  
医療費の一部については、あなたが加入している健康保険が使用されますので、  
一部あなた自身にご負担いただくことになります。ただし、健康被害に関して虚  
偽の申告をしたり、担当医師の指示に従わず、その障害があなた自身の過失や故  
意によるものである場合には、補償が受けられないこともあります。補償につい  
て詳しく説明を受けたい場合は、担当医師あるいは「18. 治験に関する相談窓  
口」にお問い合わせ下さい。補償について詳しい内容をご希望の方は資料をお渡  
しします。

### 12. 治験に参加された場合の費用について

#### 1) 治験期間中の医療費について

治験実施計画書番号： CCRC1804

(第 1.0 版)

作成日：2021 年 4 月 1 日

この治験に参加いただいた場合、この治験機器による治療自体は治験機器提供者（有限会社メイヨー）より無償で提供され、それに対する費用は発生しません。しかし、診察料や検査代、通常使用されている薬剤等の費用は従来どおり健康保険の種類に応じてご負担していただくことになります。

## 2) 治験中の費用の負担軽減について

治験に参加していただけることになった場合、治験のための診察や検査のために、来院する回数が通常の診療より増え、それに伴い交通費などの負担が増えることがあります。この負担を軽くするため、この治験の検査スケジュール表で決められた日の来院 1 回につき 7,000 円をお支払いします。お支払いは、病院からあなたの指定する銀行又は信用金庫の口座に振り込ませていただきます。

また、かかりつけの病院や他の医療機関で治療を受けた場合に、他院の担当医師へ電話や手紙で連絡をとり、医療情報の提供を求める場合があります。その際に他院から患者さんの情報を提供していただくにあたって、情報提供料としてあなたの費用負担が増える場合があります。その際は、あなたに給付される負担軽減費の中からお支払いいただくようお願い致します。

## 1 3. カルテなどの医療記録の閲覧と参加者の秘密の保全について

治験にご協力いただいた個人が特定されるような情報は厳重に保護され、外部に出されることはありません。患者さんから得られたデータがコード番号などに置き換えられ、報告書等でその患者さんのものであると特定されないことがないような取扱いをいたします。

この治験の結果およびあなたの過去 5 年間の検査結果の解析結果（以下、「治験のデータ」とします）は、国（厚生労働省）から経皮膚電気刺激療法を網膜色



素変性の治療法として認めってもらうために、厚生労働省に提出されることとなります。またこの治験機器の効果や安全性についてより詳細に検討するために、治験のデータとして使用された検査・画像などの治験機器の評価に必要なデータを外部の機関へ提出することがあります。さらに、この治験から得られた情報は、各地の病院から集められた記録をまとめて、学会や医学雑誌等に公表されることもあります。しかし、いずれの場合も、あなたのお名前などが用いられることはなく、あなたの個人情報（氏名、住所、電話番号等）は秘密事項として保護され、外部に漏れないように努めます。

また、治験がきちんと行われているかどうかを調べるために、治験機器の開発支援機関の担当者、この病院の治験審査委員会および厚生労働省など規制当局の職員が、カルテなどのあなたの医療に関する記録を閲覧することがあります（他科の診療記録や治験参加以前の期間も含みます）。このような場合でもこれらの関係者には秘密を守る義務が課せられており、患者さんのプライバシーは守られます。

さらに、他の医療機関で治療を受けた場合も、他院の担当医師へ電話や手紙で連絡をとり、医療情報の提供を求める場合があります。あなたがこの説明文書の最後にある同意文書に署名することにより、記録を閲覧することおよび他の医療機関からの情報収集に関しても承諾していただいたこととなります。

あなたは、診療情報の利用についていつでも同意を取り消すことができますが、その後はこの治験に参加いただけなくなりますのでご了承ください。同意を取り消したい場合は担当医師又は病院の治験コーディネーターにお伝えください。なお、同意を取り消すまでに収集された治験データは、上記と同様に利用されますが、同意を取り消された後は、この治験が正しく行われたかどうかを確認するような場合を除いて、あなたの診療情報が利用されることはありません。

治験実施計画書番号： CCRC1804

(第 1.0 版)

作成日：2021 年 4 月 1 日

#### 1 4. 知的財産権と利益相反について

本治験の結果が特許権等の知的財産を生み出す可能性があります。その場合の知的財産権は研究者もしくは所属する研究機関に帰属します。また、本治験の実施に関して、利益相反\*（起こりうる利害の衝突）が存在しないことを確認しています。

\*利益相反とは：たとえば製薬会社や医療機器製造会社から資金提供その他を受けている場合に自己や製薬会社、医療機器製造会社の利益を図り、患者さんの安全を損なったりデータの解釈をゆがめてしまう行為のことです。

#### 1 5. 治験に参加いただくことは自由です

この治験に参加するか否かの決定は、あなた自身の意思に委ねられます。また、治験に参加している途中でも、いつでも自由にやめることができます。もし参加していただかなくても、あなたが今後の治療を受ける上で不利な扱いを受けることは決してありません。

#### 1 6. 患者さんに守っていただきたいことについて

この治験への参加に同意していただいた場合は、次の事項をお守りください。

- 1) 治験参加期間中は、治験のスケジュールに従ってください。
- 2) 治験期間中に新型コロナウイルス感染症であると診断された場合および濃厚接触者と判断された場合は、出来るだけ早く担当医師又は治験コーディネーターに電話でご連絡下さい。新しい来院日を検討しお知らせいたします。
- 3) 現在、他の診療科や病院を受診している場合、またはくすりを飲んでいる

場合は、担当医師又は治験コーディネーターにその状況を詳しくお話下さい。その治療を行っている医師に、あなたがこの治験に参加されていることをお伝えさせていただきます。

また、市販のくすりを飲む場合も、前もって担当医師又は治験コーディネーターにご相談ください。

- 4) 治験中に行われる検査は、あなたの症状の変化や副作用を知るうえで大変重要なものになりますので、担当医師及び治験コーディネーターの指示に従って受けてください。
- 5) 治験機器を使用している間に、体調の変化など何か変わったことがあった場合は、担当医師あるいは治験コーディネーターにお知らせください。
- 6) 治験参加に同意いただいてから治療開始後 48 週の最終観察が終了するまでの治験参加期間は他の試験には参加しないでください。
- 7) その他にも、担当医師からの注意事項や指示にしたがってください。

## 17. 治験を審査する委員会

この治験は、以下の治験審査委員会で、科学的小よび医学的な面だけでなく、患者さんの安全や人権も含めた倫理的な面からも審査されています。治験審査委員会は、医療を専門としない委員や、当院と利害関係のない委員も含まれていません。

- 1) 名称：千葉大学医学部附属病院 治験審査委員会
- 2) 設置者：千葉大学医学部附属病院長
- 3) 所在地：〒260-8677 千葉県千葉市中央区亥鼻 1-8-1

治験を開始した後も、上記の内容が変更された場合、重篤な副作用の発現といった安全性情報が得られた場合など、この治験を継続して良いかを、当院の病院

治験実施計画書番号： CCRC1804  
(第 1.0 版)  
作成日：2021 年 4 月 1 日

1  
2  
3  
4  
5  
6 長からの依頼に応じて審査します。  
7

8  
9 審査の結果は当院の病院長に報告され、院長はその報告内容を基<sup>もと</sup>に当院での  
10  
11 治験の開始、継続を決定します。  
12

13  
14 なお、治験審査委員会の手順書（審査の進め方を示した文書）、議事概要（話  
15  
16 し合いの記録）や委員のリストなどの情報について知りたい場合は、ホームペー  
17  
18 ジ上でご確認ください。（URL:<http://www.ho.chiba-u.ac.jp/>）  
19  
20  
21  
22  
23  
24  
25  
26  
27  
28  
29  
30  
31  
32  
33  
34  
35  
36  
37  
38  
39  
40  
41  
42  
43  
44  
45  
46  
47  
48  
49  
50  
51  
52  
53  
54  
55  
56  
57  
58  
59  
60

## 18. 治験に関する相談窓口

この治験ならびに治療の内容について、わからない言葉や、疑問、質問、もう一度聞きたいこと、更に詳細な情報を知りたいなどがありましたら、遠慮せずいつでもお尋ねください。治験が始まった後でも、わからないことがあれば、なんでもお答えいたします。また、この治験機器を使うことになにか心配がありましたら、いつでも遠慮なく私たちにご連絡ください。

以上、この治験の内容について十分ご理解いただいた上で、この治験への参加に同意していただける場合は、この説明文書の最後にある同意文書に同意年月日の記載と署名をお願いいたします。

この説明文書と同意文書（患者さん用）は大切に保管してください。

病院名：千葉大学医学部附属病院

治験責任医師：三浦 玄（職名：助教）

あなたの担当医師：\_\_\_\_\_

### 相談窓口

平日(8:30-17:00)

眼科外来 電話：043-222-7171 (代表)

内線：6802

臨床試験部 治験コーディネーター室

電話：043-226-2630 (直通)

夜間休日電話対応窓口 電話：043-222-7171 (代表)

※眼科で治験に参加している旨をお伝えください。

治験実施計画書番号：CCRC1804

(第 1.0 版)

作成日：2021 年 4 月 1 日

医師用

## 同意文書

私は、「網膜色素変性を対象とした経皮膚電気刺激の有効性及び安全性に関する検証的試験」に参加するにあたり、治験の内容について説明を受け、十分に理解した上で、自らの自由意思により本治験に参加することに同意します。

また、治験に関する負担軽減費の支払いを受けることに

同意します

同意しません（負担軽減費はいただきません）

（どちらかの口にチェックしてください）

附随研究：私の過去のカルテ上の記録を附随研究に使用することに

同意します（使用を許可します）

同意しません

（どちらかの口にチェックしてください）

同意日：西暦 \_\_\_\_\_ 年 \_\_\_\_\_ 月 \_\_\_\_\_ 日

本人（署名又は記名捺印）： \_\_\_\_\_

担当医師 説明日：西暦 \_\_\_\_\_ 年 \_\_\_\_\_ 月 \_\_\_\_\_ 日 署名： \_\_\_\_\_

説明補助者 説明日：西暦 \_\_\_\_\_ 年 \_\_\_\_\_ 月 \_\_\_\_\_ 日 署名： \_\_\_\_\_

病院用

## 同意文書

私は、「網膜色素変性を対象とした経皮膚電気刺激の有効性及び安全性に関する検証的試験」に参加するにあたり、治験内容について説明を受け、十分に理解した上で、自らの自由意思により本治験に参加することに同意します。

また、治験に関する負担軽減費の支払いを受けることに

同意します

同意しません（負担軽減費はいただきません）

（どちらかの口にチェックしてください）

附随研究：私の過去のカルテ上の記録を附随研究に使用することに

同意します（使用を許可します）

同意しません

（どちらかの口にチェックしてください）

同意日：西暦 \_\_\_\_\_ 年 \_\_\_\_\_ 月 \_\_\_\_\_ 日

本人（署名又は記名捺印）： \_\_\_\_\_

担当医師 説明日：西暦 \_\_\_\_\_ 年 \_\_\_\_\_ 月 \_\_\_\_\_ 日 署名： \_\_\_\_\_

説明補助者 説明日：西暦 \_\_\_\_\_ 年 \_\_\_\_\_ 月 \_\_\_\_\_ 日 署名： \_\_\_\_\_

治験実施計画書番号： CCRC1804

(第 1.0 版)

作成日：2021 年 4 月 1 日

|       |
|-------|
| 患者さん用 |
|-------|

## 同意文書

私は、「網膜色素変性を対象とした経皮膚電気刺激の有効性及び安全性に関する検証的試験」に参加するにあたり、治験の内容について説明を受け、十分に理解した上で、自らの自由意思により本治験に参加することに同意します。

また、治験に関する負担軽減費の支払いを受けることに

同意します

同意しません（負担軽減費はいただきません）

（どちらかの口にチェックしてください）

附随研究：私の過去のカルテ上の記録を附随研究に使用することに

同意します（使用を許可します）

同意しません

（どちらかの口にチェックしてください）

同意日：西暦 \_\_\_\_\_ 年 \_\_\_\_\_ 月 \_\_\_\_\_ 日

本人（署名又は記名捺印）： \_\_\_\_\_

担当医師 説明日：西暦 \_\_\_\_\_ 年 \_\_\_\_\_ 月 \_\_\_\_\_ 日 署名： \_\_\_\_\_

説明補助者 説明日：西暦 \_\_\_\_\_ 年 \_\_\_\_\_ 月 \_\_\_\_\_ 日 署名： \_\_\_\_\_



# Reporting checklist for protocol of a clinical trial.

Based on the SPIRIT guidelines.

## Instructions to authors

Complete this checklist by entering the page numbers from your manuscript where readers will find each of the items listed below.

Your article may not currently address all the items on the checklist. Please modify your text to include the missing information. If you are certain that an item does not apply, please write "n/a" and provide a short explanation.

Upload your completed checklist as an extra file when you submit to a journal.

In your methods section, say that you used the SPIRIT reporting guidelines, and cite them as:

Chan A-W, Tetzlaff JM, Gøtzsche PC, Altman DG, Mann H, Berlin J, Dickersin K, Hróbjartsson A, Schulz KF, Parulekar WR, Krleža-Jerić K, Laupacis A, Moher D. SPIRIT 2013 Explanation and Elaboration: Guidance for protocols of clinical trials. *BMJ*. 2013;346:e7586

|                                             |                     | Reporting Item                                                                                               | Page Number |
|---------------------------------------------|---------------------|--------------------------------------------------------------------------------------------------------------|-------------|
| <b>Administrative information</b>           |                     |                                                                                                              |             |
| Title                                       | <a href="#">#1</a>  | Descriptive title identifying the study design, population, interventions, and, if applicable, trial acronym | 1           |
| Trial registration                          | <a href="#">#2a</a> | Trial identifier and registry name. If not yet registered, name of intended registry                         | 3           |
| Trial registration: data set                | <a href="#">#2b</a> | All items from the World Health Organization Trial Registration Data Set                                     | 13          |
| Protocol version                            | <a href="#">#3</a>  | Date and version identifier                                                                                  | 3           |
| Funding                                     | <a href="#">#4</a>  | Sources and types of financial, material, and other support                                                  | 22          |
| Roles and responsibilities: contributorship | <a href="#">#5a</a> | Names, affiliations, and roles of protocol contributors                                                      | 22          |

|    |                           |                     |                                                                    |    |
|----|---------------------------|---------------------|--------------------------------------------------------------------|----|
| 1  | Roles and                 | <a href="#">#5b</a> | Name and contact information for the trial sponsor                 | 22 |
| 2  | responsibilities:         |                     |                                                                    |    |
| 3  | sponsor contact           |                     |                                                                    |    |
| 4  | information               |                     |                                                                    |    |
| 5  |                           |                     |                                                                    |    |
| 6  |                           |                     |                                                                    |    |
| 7  |                           |                     |                                                                    |    |
| 8  | Roles and                 | <a href="#">#5c</a> | Role of study sponsor and funders, if any, in study design;        | NA |
| 9  | responsibilities:         |                     | collection, management, analysis, and interpretation of data;      |    |
| 10 | sponsor and funder        |                     | writing of the report; and the decision to submit the report for   |    |
| 11 |                           |                     | publication, including whether they will have ultimate authority   |    |
| 12 |                           |                     | over any of these activities                                       |    |
| 13 |                           |                     |                                                                    |    |
| 14 |                           |                     |                                                                    |    |
| 15 |                           |                     |                                                                    |    |
| 16 | Roles and                 | <a href="#">#5d</a> | Composition, roles, and responsibilities of the coordinating       | 16 |
| 17 | responsibilities:         |                     | centre, steering committee, endpoint adjudication committee,       |    |
| 18 | committees                |                     | data management team, and other individuals or groups              |    |
| 19 |                           |                     | overseeing the trial, if applicable (see Item 21a for data         |    |
| 20 |                           |                     | monitoring committee)                                              |    |
| 21 |                           |                     |                                                                    |    |
| 22 |                           |                     |                                                                    |    |
| 23 |                           |                     |                                                                    |    |
| 24 | <b>Introduction</b>       |                     |                                                                    |    |
| 25 |                           |                     |                                                                    |    |
| 26 |                           |                     |                                                                    |    |
| 27 | Background and            | <a href="#">#6a</a> | Description of research question and justification for undertaking | 5  |
| 28 | rationale                 |                     | the trial, including summary of relevant studies (published and    |    |
| 29 |                           |                     | unpublished) examining benefits and harms for each intervention    |    |
| 30 |                           |                     |                                                                    |    |
| 31 |                           |                     |                                                                    |    |
| 32 | Background and            | <a href="#">#6b</a> | Explanation for choice of comparators                              | 5  |
| 33 | rationale: choice of      |                     |                                                                    |    |
| 34 | comparators               |                     |                                                                    |    |
| 35 |                           |                     |                                                                    |    |
| 36 |                           |                     |                                                                    |    |
| 37 | Objectives                | <a href="#">#7</a>  | Specific objectives or hypotheses                                  | 6  |
| 38 |                           |                     |                                                                    |    |
| 39 |                           |                     |                                                                    |    |
| 40 | Trial design              | <a href="#">#8</a>  | Description of trial design including type of trial (eg, parallel  | 6  |
| 41 |                           |                     | group, crossover, factorial, single group), allocation ratio, and  |    |
| 42 |                           |                     | framework (eg, superiority, equivalence, non-inferiority,          |    |
| 43 |                           |                     | exploratory)                                                       |    |
| 44 |                           |                     |                                                                    |    |
| 45 |                           |                     |                                                                    |    |
| 46 | <b>Methods:</b>           |                     |                                                                    |    |
| 47 | <b>Participants,</b>      |                     |                                                                    |    |
| 48 | <b>interventions, and</b> |                     |                                                                    |    |
| 49 | <b>outcomes</b>           |                     |                                                                    |    |
| 50 |                           |                     |                                                                    |    |
| 51 |                           |                     |                                                                    |    |
| 52 |                           |                     |                                                                    |    |
| 53 | Study setting             | <a href="#">#9</a>  | Description of study settings (eg, community clinic, academic      | 6  |
| 54 |                           |                     | hospital) and list of countries where data will be collected.      |    |
| 55 |                           |                     | Reference to where list of study sites can be obtained             |    |
| 56 |                           |                     |                                                                    |    |
| 57 |                           |                     |                                                                    |    |
| 58 |                           |                     |                                                                    |    |
| 59 |                           |                     |                                                                    |    |
| 60 |                           |                     |                                                                    |    |

|    |                              |                      |                                                                                                                                                                                                                                                                                                                                                                                |    |
|----|------------------------------|----------------------|--------------------------------------------------------------------------------------------------------------------------------------------------------------------------------------------------------------------------------------------------------------------------------------------------------------------------------------------------------------------------------|----|
| 1  | Eligibility criteria         | <a href="#">#10</a>  | Inclusion and exclusion criteria for participants. If applicable, eligibility criteria for study centres and individuals who will perform the interventions (eg, surgeons, psychotherapists)                                                                                                                                                                                   | 10 |
| 2  |                              |                      |                                                                                                                                                                                                                                                                                                                                                                                |    |
| 3  |                              |                      |                                                                                                                                                                                                                                                                                                                                                                                |    |
| 4  |                              |                      |                                                                                                                                                                                                                                                                                                                                                                                |    |
| 5  |                              |                      |                                                                                                                                                                                                                                                                                                                                                                                |    |
| 6  | Interventions:               | <a href="#">#11a</a> | Interventions for each group with sufficient detail to allow replication, including how and when they will be administered                                                                                                                                                                                                                                                     | 13 |
| 7  | description                  |                      |                                                                                                                                                                                                                                                                                                                                                                                |    |
| 8  |                              |                      |                                                                                                                                                                                                                                                                                                                                                                                |    |
| 9  |                              |                      |                                                                                                                                                                                                                                                                                                                                                                                |    |
| 10 | Interventions:               | <a href="#">#11b</a> | Criteria for discontinuing or modifying allocated interventions for a given trial participant (eg, drug dose change in response to harms, participant request, or improving / worsening disease)                                                                                                                                                                               | 15 |
| 11 | modifications                |                      |                                                                                                                                                                                                                                                                                                                                                                                |    |
| 12 |                              |                      |                                                                                                                                                                                                                                                                                                                                                                                |    |
| 13 |                              |                      |                                                                                                                                                                                                                                                                                                                                                                                |    |
| 14 |                              |                      |                                                                                                                                                                                                                                                                                                                                                                                |    |
| 15 | Interventions:               | <a href="#">#11c</a> | Strategies to improve adherence to intervention protocols, and any procedures for monitoring adherence (eg, drug tablet return; laboratory tests)                                                                                                                                                                                                                              | 15 |
| 16 | adherence                    |                      |                                                                                                                                                                                                                                                                                                                                                                                |    |
| 17 |                              |                      |                                                                                                                                                                                                                                                                                                                                                                                |    |
| 18 |                              |                      |                                                                                                                                                                                                                                                                                                                                                                                |    |
| 19 |                              |                      |                                                                                                                                                                                                                                                                                                                                                                                |    |
| 20 |                              |                      |                                                                                                                                                                                                                                                                                                                                                                                |    |
| 21 | Interventions:               | <a href="#">#11d</a> | Relevant concomitant care and interventions that are permitted or prohibited during the trial                                                                                                                                                                                                                                                                                  | 12 |
| 22 | concomitant care             |                      |                                                                                                                                                                                                                                                                                                                                                                                |    |
| 23 |                              |                      |                                                                                                                                                                                                                                                                                                                                                                                |    |
| 24 |                              |                      |                                                                                                                                                                                                                                                                                                                                                                                |    |
| 25 | Outcomes                     | <a href="#">#12</a>  | Primary, secondary, and other outcomes, including the specific measurement variable (eg, systolic blood pressure), analysis metric (eg, change from baseline, final value, time to event), method of aggregation (eg, median, proportion), and time point for each outcome. Explanation of the clinical relevance of chosen efficacy and harm outcomes is strongly recommended | 9  |
| 26 |                              |                      |                                                                                                                                                                                                                                                                                                                                                                                |    |
| 27 |                              |                      |                                                                                                                                                                                                                                                                                                                                                                                |    |
| 28 |                              |                      |                                                                                                                                                                                                                                                                                                                                                                                |    |
| 29 |                              |                      |                                                                                                                                                                                                                                                                                                                                                                                |    |
| 30 |                              |                      |                                                                                                                                                                                                                                                                                                                                                                                |    |
| 31 |                              |                      |                                                                                                                                                                                                                                                                                                                                                                                |    |
| 32 |                              |                      |                                                                                                                                                                                                                                                                                                                                                                                |    |
| 33 |                              |                      |                                                                                                                                                                                                                                                                                                                                                                                |    |
| 34 | Participant timeline         | <a href="#">#13</a>  | Time schedule of enrolment, interventions (including any run-ins and washouts), assessments, and visits for participants. A schematic diagram is highly recommended (see Figure)                                                                                                                                                                                               | 8  |
| 35 |                              |                      |                                                                                                                                                                                                                                                                                                                                                                                |    |
| 36 |                              |                      |                                                                                                                                                                                                                                                                                                                                                                                |    |
| 37 |                              |                      |                                                                                                                                                                                                                                                                                                                                                                                |    |
| 38 |                              |                      |                                                                                                                                                                                                                                                                                                                                                                                |    |
| 39 |                              |                      |                                                                                                                                                                                                                                                                                                                                                                                |    |
| 40 | Sample size                  | <a href="#">#14</a>  | Estimated number of participants needed to achieve study objectives and how it was determined, including clinical and statistical assumptions supporting any sample size calculations                                                                                                                                                                                          | 18 |
| 41 |                              |                      |                                                                                                                                                                                                                                                                                                                                                                                |    |
| 42 |                              |                      |                                                                                                                                                                                                                                                                                                                                                                                |    |
| 43 |                              |                      |                                                                                                                                                                                                                                                                                                                                                                                |    |
| 44 |                              |                      |                                                                                                                                                                                                                                                                                                                                                                                |    |
| 45 | Recruitment                  | <a href="#">#15</a>  | Strategies for achieving adequate participant enrolment to reach target sample size                                                                                                                                                                                                                                                                                            | NA |
| 46 |                              |                      |                                                                                                                                                                                                                                                                                                                                                                                |    |
| 47 |                              |                      |                                                                                                                                                                                                                                                                                                                                                                                |    |
| 48 |                              |                      |                                                                                                                                                                                                                                                                                                                                                                                |    |
| 49 | <b>Methods: Assignment</b>   |                      |                                                                                                                                                                                                                                                                                                                                                                                |    |
| 50 | <b>of interventions (for</b> |                      |                                                                                                                                                                                                                                                                                                                                                                                |    |
| 51 | <b>controlled trials)</b>    |                      |                                                                                                                                                                                                                                                                                                                                                                                |    |
| 52 |                              |                      |                                                                                                                                                                                                                                                                                                                                                                                |    |
| 53 |                              |                      |                                                                                                                                                                                                                                                                                                                                                                                |    |
| 54 | Allocation: sequence         | <a href="#">#16a</a> | Method of generating the allocation sequence (eg, computer-generated random numbers), and list of any factors for stratification. To reduce predictability of a random sequence, details of any planned restriction (eg, blocking) should be                                                                                                                                   | 13 |
| 55 | generation                   |                      |                                                                                                                                                                                                                                                                                                                                                                                |    |
| 56 |                              |                      |                                                                                                                                                                                                                                                                                                                                                                                |    |
| 57 |                              |                      |                                                                                                                                                                                                                                                                                                                                                                                |    |
| 58 |                              |                      |                                                                                                                                                                                                                                                                                                                                                                                |    |
| 59 |                              |                      |                                                                                                                                                                                                                                                                                                                                                                                |    |
| 60 |                              |                      |                                                                                                                                                                                                                                                                                                                                                                                |    |

provided in a separate document that is unavailable to those who enrol participants or assign interventions

|    |                        |                      |                                                                       |
|----|------------------------|----------------------|-----------------------------------------------------------------------|
| 1  |                        |                      |                                                                       |
| 2  |                        |                      |                                                                       |
| 3  |                        |                      |                                                                       |
| 4  | Allocation             | <a href="#">#16b</a> | Mechanism of implementing the allocation sequence (eg, central 14     |
| 5  | concealment            |                      | telephone; sequentially numbered, opaque, sealed envelopes),          |
| 6  |                        |                      | describing any steps to conceal the sequence until interventions      |
| 7  | mechanism              |                      | are assigned                                                          |
| 8  |                        |                      |                                                                       |
| 9  |                        |                      |                                                                       |
| 10 |                        |                      |                                                                       |
| 11 | Allocation:            | <a href="#">#16c</a> | Who will generate the allocation sequence, who will enrol 13          |
| 12 | implementation         |                      | participants, and who will assign participants to interventions       |
| 13 |                        |                      |                                                                       |
| 14 | Blinding (masking)     | <a href="#">#17a</a> | Who will be blinded after assignment to interventions (eg, trial 14   |
| 15 |                        |                      | participants, care providers, outcome assessors, data analysts),      |
| 16 |                        |                      | and how                                                               |
| 17 |                        |                      |                                                                       |
| 18 |                        |                      |                                                                       |
| 19 |                        |                      |                                                                       |
| 20 | Blinding (masking):    | <a href="#">#17b</a> | If blinded, circumstances under which unblinding is permissible, NA   |
| 21 | emergency unblinding   |                      | and procedure for revealing a participant's allocated intervention    |
| 22 |                        |                      | during the trial                                                      |
| 23 |                        |                      |                                                                       |
| 24 |                        |                      |                                                                       |
| 25 | <b>Methods: Data</b>   |                      |                                                                       |
| 26 | <b>collection,</b>     |                      |                                                                       |
| 27 | <b>management, and</b> |                      |                                                                       |
| 28 | <b>analysis</b>        |                      |                                                                       |
| 29 |                        |                      |                                                                       |
| 30 |                        |                      |                                                                       |
| 31 |                        |                      |                                                                       |
| 32 | Data collection plan   | <a href="#">#18a</a> | Plans for assessment and collection of outcome, baseline, and 14      |
| 33 |                        |                      | other trial data, including any related processes to promote data     |
| 34 |                        |                      | quality (eg, duplicate measurements, training of assessors) and a     |
| 35 |                        |                      | description of study instruments (eg, questionnaires, laboratory      |
| 36 |                        |                      | tests) along with their reliability and validity, if known.           |
| 37 |                        |                      | Reference to where data collection forms can be found, if not in      |
| 38 |                        |                      | the protocol                                                          |
| 39 |                        |                      |                                                                       |
| 40 |                        |                      |                                                                       |
| 41 |                        |                      |                                                                       |
| 42 |                        |                      |                                                                       |
| 43 | Data collection plan:  | <a href="#">#18b</a> | Plans to promote participant retention and complete follow-up, 14     |
| 44 | retention              |                      | including list of any outcome data to be collected for participants   |
| 45 |                        |                      | who discontinue or deviate from intervention protocols                |
| 46 |                        |                      |                                                                       |
| 47 |                        |                      |                                                                       |
| 48 |                        |                      |                                                                       |
| 49 | Data management        | <a href="#">#19</a>  | Plans for data entry, coding, security, and storage, including any 13 |
| 50 |                        |                      | related processes to promote data quality (eg, double data entry;     |
| 51 |                        |                      | range checks for data values). Reference to where details of data     |
| 52 |                        |                      | management procedures can be found, if not in the protocol            |
| 53 |                        |                      |                                                                       |
| 54 |                        |                      |                                                                       |
| 55 | Statistics: outcomes   | <a href="#">#20a</a> | Statistical methods for analysing primary and secondary 17            |
| 56 |                        |                      | outcomes. Reference to where other details of the statistical         |
| 57 |                        |                      | analysis plan can be found, if not in the protocol                    |
| 58 |                        |                      |                                                                       |
| 59 |                        |                      |                                                                       |
| 60 |                        |                      |                                                                       |

|    |                            |                      |                                                                    |    |
|----|----------------------------|----------------------|--------------------------------------------------------------------|----|
| 1  | Statistics: additional     | <a href="#">#20b</a> | Methods for any additional analyses (eg, subgroup and adjusted     | NA |
| 2  | analyses                   |                      | analyses)                                                          |    |
| 3  |                            |                      |                                                                    |    |
| 4  | Statistics: analysis       | <a href="#">#20c</a> | Definition of analysis population relating to protocol non-        | 17 |
| 5  | population and missing     |                      | adherence (eg, as randomised analysis), and any statistical        |    |
| 6  | data                       |                      | methods to handle missing data (eg, multiple imputation)           |    |
| 7  |                            |                      |                                                                    |    |
| 8  |                            |                      |                                                                    |    |
| 9  |                            |                      |                                                                    |    |
| 10 | <b>Methods: Monitoring</b> |                      |                                                                    |    |
| 11 |                            |                      |                                                                    |    |
| 12 | Data monitoring:           | <a href="#">#21a</a> | Composition of data monitoring committee (DMC); summary of         | 16 |
| 13 | formal committee           |                      | its role and reporting structure; statement of whether it is       |    |
| 14 |                            |                      | independent from the sponsor and competing interests; and          |    |
| 15 |                            |                      | reference to where further details about its charter can be found, |    |
| 16 |                            |                      | if not in the protocol. Alternatively, an explanation of why a     |    |
| 17 |                            |                      | DMC is not needed                                                  |    |
| 18 |                            |                      |                                                                    |    |
| 19 |                            |                      |                                                                    |    |
| 20 |                            |                      |                                                                    |    |
| 21 |                            |                      |                                                                    |    |
| 22 | Data monitoring:           | <a href="#">#21b</a> | Description of any interim analyses and stopping guidelines,       | 19 |
| 23 | interim analysis           |                      | including who will have access to these interim results and make   |    |
| 24 |                            |                      | the final decision to terminate the trial                          |    |
| 25 |                            |                      |                                                                    |    |
| 26 |                            |                      |                                                                    |    |
| 27 | Harms                      | <a href="#">#22</a>  | Plans for collecting, assessing, reporting, and managing solicited | 15 |
| 28 |                            |                      | and spontaneously reported adverse events and other unintended     |    |
| 29 |                            |                      | effects of trial interventions or trial conduct                    |    |
| 30 |                            |                      |                                                                    |    |
| 31 |                            |                      |                                                                    |    |
| 32 |                            |                      |                                                                    |    |
| 33 | Auditing                   | <a href="#">#23</a>  | Frequency and procedures for auditing trial conduct, if any, and   | 15 |
| 34 |                            |                      | whether the process will be independent from investigators and     |    |
| 35 |                            |                      | the sponsor                                                        |    |
| 36 |                            |                      |                                                                    |    |
| 37 |                            |                      |                                                                    |    |
| 38 | <b>Ethics and</b>          |                      |                                                                    |    |
| 39 | <b>dissemination</b>       |                      |                                                                    |    |
| 40 |                            |                      |                                                                    |    |
| 41 |                            |                      |                                                                    |    |
| 42 | Research ethics            | <a href="#">#24</a>  | Plans for seeking research ethics committee / institutional review | 3  |
| 43 | approval                   |                      | board (REC / IRB) approval                                         |    |
| 44 |                            |                      |                                                                    |    |
| 45 |                            |                      |                                                                    |    |
| 46 | Protocol amendments        | <a href="#">#25</a>  | Plans for communicating important protocol modifications (eg,      | NA |
| 47 |                            |                      | changes to eligibility criteria, outcomes, analyses) to relevant   |    |
| 48 |                            |                      | parties (eg, investigators, REC / IRBs, trial participants, trial  |    |
| 49 |                            |                      | registries, journals, regulators)                                  |    |
| 50 |                            |                      |                                                                    |    |
| 51 |                            |                      |                                                                    |    |
| 52 |                            |                      |                                                                    |    |
| 53 | Consent or assent          | <a href="#">#26a</a> | Who will obtain informed consent or assent from potential trial    | 24 |
| 54 |                            |                      | participants or authorised surrogates, and how (see Item 32)       |    |
| 55 |                            |                      |                                                                    |    |
| 56 |                            |                      |                                                                    |    |
| 57 |                            |                      |                                                                    |    |
| 58 |                            |                      |                                                                    |    |
| 59 |                            |                      |                                                                    |    |
| 60 |                            |                      |                                                                    |    |

|    |                          |                      |                                                                      |    |
|----|--------------------------|----------------------|----------------------------------------------------------------------|----|
| 1  | Consent or assent:       | <a href="#">#26b</a> | Additional consent provisions for collection and use of              | NA |
| 2  | ancillary studies        |                      | participant data and biological specimens in ancillary studies, if   |    |
| 3  |                          |                      | applicable                                                           |    |
| 4  |                          |                      |                                                                      |    |
| 5  |                          |                      |                                                                      |    |
| 6  | Confidentiality          | <a href="#">#27</a>  | How personal information about potential and enrolled                | 23 |
| 7  |                          |                      | participants will be collected, shared, and maintained in order to   |    |
| 8  |                          |                      | protect confidentiality before, during, and after the trial          |    |
| 9  |                          |                      |                                                                      |    |
| 10 |                          |                      |                                                                      |    |
| 11 | Declaration of interests | <a href="#">#28</a>  | Financial and other competing interests for principal investigators  | 23 |
| 12 |                          |                      | for the overall trial and each study site                            |    |
| 13 |                          |                      |                                                                      |    |
| 14 |                          |                      |                                                                      |    |
| 15 | Data access              | <a href="#">#29</a>  | Statement of who will have access to the final trial dataset, and    | 22 |
| 16 |                          |                      | disclosure of contractual agreements that limit such access for      |    |
| 17 |                          |                      | investigators                                                        |    |
| 18 |                          |                      |                                                                      |    |
| 19 |                          |                      |                                                                      |    |
| 20 | Ancillary and post trial | <a href="#">#30</a>  | Provisions, if any, for ancillary and post-trial care, and for       | 16 |
| 21 | care                     |                      | compensation to those who suffer harm from trial participation       |    |
| 22 |                          |                      |                                                                      |    |
| 23 |                          |                      |                                                                      |    |
| 24 | Dissemination policy:    | <a href="#">#31a</a> | Plans for investigators and sponsor to communicate trial results     | 19 |
| 25 | trial results            |                      | to participants, healthcare professionals, the public, and other     |    |
| 26 |                          |                      | relevant groups (eg, via publication, reporting in results           |    |
| 27 |                          |                      | databases, or other data sharing arrangements), including any        |    |
| 28 |                          |                      | publication restrictions                                             |    |
| 29 |                          |                      |                                                                      |    |
| 30 |                          |                      |                                                                      |    |
| 31 |                          |                      |                                                                      |    |
| 32 |                          |                      |                                                                      |    |
| 33 | Dissemination policy:    | <a href="#">#31b</a> | Authorship eligibility guidelines and any intended use of            | NA |
| 34 | authorship               |                      | professional writers                                                 |    |
| 35 |                          |                      |                                                                      |    |
| 36 |                          |                      |                                                                      |    |
| 37 | Dissemination policy:    | <a href="#">#31c</a> | Plans, if any, for granting public access to the full protocol,      | NA |
| 38 | reproducible research    |                      | participant-level dataset, and statistical code                      |    |
| 39 |                          |                      |                                                                      |    |
| 40 |                          |                      |                                                                      |    |
| 41 | <b>Appendices</b>        |                      |                                                                      |    |
| 42 |                          |                      |                                                                      |    |
| 43 | Informed consent         | <a href="#">#32</a>  | Model consent form and other related documentation given to          | 7  |
| 44 | materials                |                      | participants and authorised surrogates                               |    |
| 45 |                          |                      |                                                                      |    |
| 46 |                          |                      |                                                                      |    |
| 47 | Biological specimens     | <a href="#">#33</a>  | Plans for collection, laboratory evaluation, and storage of          | NA |
| 48 |                          |                      | biological specimens for genetic or molecular analysis in the        |    |
| 49 |                          |                      | current trial and for future use in ancillary studies, if applicable |    |
| 50 |                          |                      |                                                                      |    |
| 51 |                          |                      |                                                                      |    |

None The SPIRIT Explanation and Elaboration paper is distributed under the terms of the Creative Commons Attribution License CC-BY-NC. This checklist can be completed online using <https://www.goodreports.org/>, a tool made by the [EQUATOR Network](#) in collaboration with [Penelope.ai](#)

# BMJ Open

**Evaluating the efficacy and safety of transdermal electrical stimulation on the visual functions of patients with retinitis pigmentosa: a clinical trial protocol for a prospective, multi-center, randomized, double-masked, and sham-controlled design (ePICO trial)**

|                                 |                                                                                                                                                                                                                                                                                                                                                                                                                                                                                                                                                                                                                                                                                                                                                                                                                                                     |
|---------------------------------|-----------------------------------------------------------------------------------------------------------------------------------------------------------------------------------------------------------------------------------------------------------------------------------------------------------------------------------------------------------------------------------------------------------------------------------------------------------------------------------------------------------------------------------------------------------------------------------------------------------------------------------------------------------------------------------------------------------------------------------------------------------------------------------------------------------------------------------------------------|
| Journal:                        | <i>BMJ Open</i>                                                                                                                                                                                                                                                                                                                                                                                                                                                                                                                                                                                                                                                                                                                                                                                                                                     |
| Manuscript ID                   | bmjopen-2021-057193.R1                                                                                                                                                                                                                                                                                                                                                                                                                                                                                                                                                                                                                                                                                                                                                                                                                              |
| Article Type:                   | Protocol                                                                                                                                                                                                                                                                                                                                                                                                                                                                                                                                                                                                                                                                                                                                                                                                                                            |
| Date Submitted by the Author:   | 11-Feb-2022                                                                                                                                                                                                                                                                                                                                                                                                                                                                                                                                                                                                                                                                                                                                                                                                                                         |
| Complete List of Authors:       | Miura, Gen ; Chiba University Graduate School of Medicine School of Medicine, Department of Ophthalmology and Visual Science<br>Ozawa, Yoshihito; Chiba University Hospital, Clinical Research Center<br>Shiko, Yuki; Chiba University Hospital, Clinical Research Center<br>Kawasaki, Yohei; Chiba University Hospital, Clinical Research Center<br>Iwase, Takayuki; Chiba University Hospital, Clinical Research Center<br>Fujiwara, Tadami; Chiba University Hospital, Clinical Research Center<br>Baba, Takayuki; Chiba University Graduate School of Medicine School of Medicine, Department of Ophthalmology and Visual Science<br>Hanaoka, Hideki; Chiba University Hospital, Clinical Research Center<br>Yamamoto, Shuichi; Chiba University Graduate School of Medicine School of Medicine, Department of Ophthalmology and Visual Science |
| <b>Primary Subject Heading</b>: | Ophthalmology                                                                                                                                                                                                                                                                                                                                                                                                                                                                                                                                                                                                                                                                                                                                                                                                                                       |
| Secondary Subject Heading:      | Research methods                                                                                                                                                                                                                                                                                                                                                                                                                                                                                                                                                                                                                                                                                                                                                                                                                                    |
| Keywords:                       | Vitreoretinal < OPHTHALMOLOGY, Medical ophthalmology < OPHTHALMOLOGY, Neuro-ophthalmology < OPHTHALMOLOGY                                                                                                                                                                                                                                                                                                                                                                                                                                                                                                                                                                                                                                                                                                                                           |
|                                 |                                                                                                                                                                                                                                                                                                                                                                                                                                                                                                                                                                                                                                                                                                                                                                                                                                                     |

SCHOLARONE™  
Manuscripts

1  
2  
3  
4 1 **Evaluating the efficacy and safety of transdermal electrical stimulation on the**  
5  
6  
7 2 **visual functions of patients with retinitis pigmentosa: a clinical trial protocol**  
8  
9  
10 3 **for a prospective, multi-center, randomized, double-masked, and sham-**  
11  
12  
13 4 **controlled design (ePICO trial)**  
14  
15  
16 5  
17  
18  
19 6  
20  
21

22 7 Gen Miura<sup>1\*</sup>, Yoshihito Ozawa<sup>2</sup>, Yuki Shiko<sup>2</sup>, Yohei Kawasaki<sup>2</sup>, Takayuki Iwase<sup>2</sup>,  
23  
24  
25 8 Tadami Fujiwara<sup>2</sup>, Takayuki Baba<sup>1</sup>, Hideki Hanaoka<sup>2</sup>, Shuichi Yamamoto<sup>1</sup>  
26  
27

28 9 <sup>1</sup>Department of Ophthalmology and Visual Science, Chiba University Graduate  
29  
30  
31 10 School of Medicine, Chiba, Japan,  
32  
33

34 11 <sup>2</sup>Clinical Research Center, Chiba University Hospital, Chiba, Japan.  
35  
36

37 12 Correspondence: Gen Miura, MD, PhD  
38  
39

40 13 Department of Ophthalmology and Visual Science, Chiba University Graduate  
41  
42

43 14 School of Medicine, Inohana 1-8-1, Chuo-ku, Chiba 260-8670, Japan;  
44  
45

46 15 Tel/Fax: 81-43-226-2124/81-43-224-4162  
47  
48

49 16 E-mail: gmiura2@chiba-u.jp  
50  
51  
52  
53  
54  
55  
56  
57  
58  
59  
60



1  
2  
3  
4 18 **ABSTRACT**

5  
6  
7 19 **Introduction:** Previously, we conducted a clinical trial to evaluate the safety and  
8  
9  
10 20 efficacy of transdermal electrical stimulation (TdES) with skin electrodes to improve  
11  
12  
13 21 the visual functions in patients with retinitis pigmentosa (RP). No adverse events  
14  
15  
16 22 were related to the treatment during follow-up examinations, and TdES significantly  
17  
18  
19 23 improved the mean visual acuity and visual field sensitivity.

20  
21  
22 24 **Methods and analysis:** We developed a study protocol for a prospective, multi-  
23  
24  
25 25 center, randomized, double-masked, and sham-controlled pivotal clinical trial,  
26  
27  
28 26 planned to commence on June 2021. We intend to compare the maintenance or  
29  
30  
31 27 improvement in best corrected visual acuity, and safety of TdES using skin  
32  
33  
34 28 electrodes between patients with RP and the sham group. The primary endpoint  
35  
36  
37 29 comprises the superiority of the logarithm of the minimum angle of resolution  
38  
39  
40 30 (logMAR) visual acuity change at week 24 from baseline in the treatment and sham  
41  
42  
43 31 groups. Secondary endpoints involve the comparison of the treatment and sham  
44  
45  
46 32 groups at week 24 for the logMAR visual acuity, early treatment diabetic retinopathy  
47  
48  
49 33 study visual acuity, the mean deviation value of Humphrey field analyzer 10-2,  
50  
51  
52 34 monocular Humphrey Esterman visual field test score, ellipsoid zone length, central  
53  
54  
55 35 foveal thickness, and 25-item National Eye Institute Visual Function Questionnaire  
56  
57  
58 36 score. We intend to enroll 50 patients from three Japanese institutions within 1 year  
59  
60

1  
2  
3  
4 37 and follow them up for 1 years.  
5  
6

7 38 **Ethics and dissemination:** The protocol was approved by the institutional review  
8  
9  
10 39 board at the Chiba University Hospital and two other institutions, and was registered  
11  
12  
13 40 with the Japan Registry of Clinical Trials on May 17, 2021. The trial will be conducted  
14  
15  
16 41 in accordance with the principles of the Declaration of Helsinki, and is in accordance  
17  
18  
19 42 with Good Clinical Practice standards. The findings will be published in a peer-  
20  
21  
22 43 reviewed journal.  
23  
24

25 44 **Trial registration number**

26  
27  
28 45 Japan Registry of Clinical Trials (JRCT2032210094).  
29  
30  
31  
32  
33  
34  
35  
36  
37  
38  
39  
40  
41  
42  
43  
44  
45  
46  
47  
48  
49  
50  
51  
52  
53  
54  
55  
56  
57  
58  
59  
60

## 46 **Strengths and limitations of this study**

- 47 ● This is the first multi-center, randomized, sham-controlled, and double-masked  
48 pivotal trial aimed at verifying the maintenance or improvement in best corrected  
49 visual acuity, and safety of TdES using skin electrodes in patients with retinitis  
50 pigmentosa (RP).
- 51 ● We intend to use a less invasive and easily applicable electrical stimulator with  
52 skin electrodes, and no serious adverse events were observed in our previous  
53 study using this device.
- 54 ● A multi-center (three university hospitals), double-masked, sham-controlled, and  
55 randomized controlled trial is the optimal study design for verifying the  
56 effectiveness of TdES.
- 57 ● Despite fewer patients owing to the rare occurrence of RP, the necessary  
58 sample size is estimated to comprise 50 patients based on previous study data.  
59 Second limitation is that the ideal regimen of electrical stimulation is not yet  
60 known.

61

## 62 INTRODUCTION

63 Spontaneous afferent electrical activity reportedly regulates target cell death  
64 in the developing rat visual system.<sup>1</sup> Short periods of low-frequency electrical  
65 stimulation accelerate the axonal regeneration of peripheral neurons.<sup>2</sup> Morimoto et  
66 al. reported on significantly higher survival rate of rat retinal ganglion cells (RGCs)  
67 following optic nerve transection in rats whose optic nerves were electrically  
68 stimulated than those of the untreated group.<sup>3</sup> Moreover, electrical stimulation  
69 exerted a neuroprotective effect on RGCs, followed by the development of a  
70 transcorneal electrical stimulation (TcES) device that could be used in humans.<sup>4</sup>  
71 Animal models of retinitis pigmentosa (RP), including rats and rabbits,<sup>5-7</sup> and clinical  
72 studies on patients with RP mentioned that TcES can protect retinal photoreceptors.  
73 Moreover, TcES improves the visual acuity, visual fields, and electroretinograms.<sup>8,9</sup>  
74 Therefore, recommendation is proposed for TcES use in the treatment of retinitis  
75 pigmentosa, especially in Europe.<sup>10</sup> Previous TcES studies used the contact lens  
76 type or Dawson–Trick–Litzkow fiber-type corneal electrodes, and reported on an  
77 association between TcES sessions and dry eye symptoms.<sup>11</sup> As another attempt to  
78 establish electrical stimulation as a treatment for RP, Jackson et al reported about  
79 the safety and efficacy of intravitreal quantum dots for retinitis pigmentosa and  
80 showed that no adverse reactions were attributed to the quantum dots, and the

1  
2  
3  
4 81 average vision of treated eyes improved.<sup>12</sup>  
5  
6

7 82 Based on this information, we previously conducted a prospective, non-  
8  
9  
10 83 randomized, open-label, uncontrolled clinical trial with 20 eyes of 10 RP patients to  
11  
12  
13 84 evaluate the safety and efficacy of transdermal electrical stimulation (TdES) on the  
14  
15  
16 85 visual function. That was a 12 weeks trial consisting of 6 TdES treatments every 2  
17  
18  
19 86 weeks.<sup>13</sup> We used a prototype equipment with a patch containing an electrode  
20  
21  
22 87 applied to the skin. Electric stimulation was delivered through the skin, developed  
23  
24  
25 88 jointly with the Mayo Co., Ltd. No adverse events were reported during the follow-up  
26  
27  
28 89 examinations, and the mean logarithm of the minimum angle of resolution (logMAR),  
29  
30  
31 90 Early Treatment Diabetic Retinopathy Study (ETDRS) visual acuity, and the mean  
32  
33  
34 91 deviation of the Humphrey field analyzer (HFA) 10-2 significantly improved post-  
35  
36  
37 92 TdES. Therefore, we planned a prospective, multi-center, randomized, double-  
38  
39  
40 93 masked, and sham-controlled pivotal clinical trial to compare the maintenance or  
41  
42  
43 94 improvement in best corrected visual acuity (BCVA), and safety of TdES using skin  
44  
45  
46 95 electrodes between patients with RP and the sham group. The trial protocol was  
47  
48  
49 96 approved in May 2021 by the Pharmaceuticals and Medical Devices Agency  
50  
51  
52 97 (PMDA), Japan, and the trial was initiated in June 2021. Approval was obtained from  
53  
54  
55 98 the institutional review board (IRB) prior to patient recruitment at each institution.  
56  
57

58 99  
59  
60

## 100 **METHODS AND ANALYSIS**

### 101 **Objectives**

102 We aimed to verify the long-term efficacy and safety of transdermal electrical  
103 stimulation with a skin electrode as a novel treatment for patients with RP.

104 Furthermore, we intended to investigate the long-term course and safety following  
105 the discontinuation of TdES.

### 106 **Trial design**

107 We proposed a prospective, multi-center, randomized, double-masked, and  
108 sham-controlled pivotal clinical trial. The original protocol and informed consent  
109 forms written in Japanese are provided in the online supplementary appendices 1  
110 and 2, and this protocol meets the criteria of the Standard Protocol Items:

111 Recommendations for Interventional Trials 2013 statement. The trial was conceived  
112 and initiated at the Chiba University Hospital and will be conducted across three  
113 institutions (Chiba University Hospital, Kobe University Hospital, and Nagoya City  
114 University Hospital) in Japan. Patients were randomly assigned to receive either  
115 TdES (intervention) or sham (control), immediately before treatment (details below).

116 Figure 1 illustrates the study design. This study consists of three periods,  
117 namely pre-observation, treatment, and post-observation. After obtaining informed  
118 consent, patients were randomly assigned 1: 1 to the TdES and sham groups. The

1  
2  
3  
4 119 permissible range for the pre-observation period is 4 weeks. TdES will be performed  
5  
6  
7 120 12 times. The primary and secondary endpoints will be evaluated at week 24. In  
8  
9  
10 121 contrast, the exploratory endpoints will be evaluated at weeks 36 and 48. Table 1  
11  
12  
13 122 lists all schedules for each period to be performed in this study.  
14  
15  
16 123

For peer review only





1  
2  
3  
4 126 **Abbreviations:** TdES, transdermal electrical stimulation; VA, visual acuity; ETDRS,  
5  
6  
7 127 Early Treatment Diabetic Retinopathy Study; HFA, Humphrey field analyzer; OCT,  
8  
9  
10 128 optical coherence tomography; NEI VFQ-25, 25-item National Eye Institute Visual  
11  
12  
13 129 Function Questionnaire; IOP: intraocular pressure; and fds: fundus examination.

14  
15  
16 130 Black circles are items that must be performed. White circles are items to be performed  
17  
18  
19 131 only when the investigator deems it necessary.  
20  
21

22 132

23  
24  
25 133 In this trial, FUJITSU Life Science Solution tsClinical DDworks NX, which is a clinical  
26  
27  
28 134 trial work support system is used for communicating important protocol modifications  
29  
30  
31 135 to relevant parties.  
32

33  
34 136

### 35 36 37 137 **Primary endpoint**

38  
39  
40 138 The primary endpoint comprises the superiority of the logMAR visual acuity  
41  
42  
43 139 in the change from baseline at week 24 in the TdES group, compared to the sham  
44  
45  
46 140 group.  
47

### 48 49 141 **Secondary endpoints**

50  
51  
52 142 The secondary endpoints include a comparison of the TdES and sham  
53  
54  
55 143 groups at baseline to week 24 for the logMAR visual acuity, ETDRS visual acuity, the  
56  
57  
58 144 mean deviation (MD) value of HFA 10-2 (dB), monocular Humphrey Esterman visual  
59

1  
2  
3  
4 145 field test score, ellipsoid zone length ( $\mu\text{m}$ ), central foveal thickness ( $\mu\text{m}$ ), and compo

5  
6  
7 146 9 score of the 25-item National Eye Institute Visual Function Questionnaire (NEI

8  
9  
10 147 VFQ-25) (details below).

### 11 12 13 148 **Exploratory endpoints**

14  
15  
16 149 The exploratory endpoints comprised a comparison of the TdES and sham

17  
18  
19 150 groups at weeks 36 and 48 for items of the secondary endpoints.

### 20 21 22 151 **Safety endpoints**

23  
24  
25 152 We intend to evaluate the number and rate of adverse events while

26  
27  
28 153 analyzing the safety endpoints. In addition to the evaluation of possible keratitis,

29  
30  
31 154 dermatitis, anterior segment, optic media, and fundus, we will determine the effects

32  
33  
34 155 on the facial and trigeminal nerves during the scheduled visit. Moreover, the patients

35  
36  
37 156 will undergo safety assessment by optical coherence tomography (OCT). All adverse

38  
39  
40 157 events are coded in MedDRA (vas.6.0) and recorded.

### 41 42 43 158 **Outcome measures**

44  
45  
46 159 The BCVA was measured monocularly using a Japanese standard Landolt

47  
48  
49 160 ring chart (System Charts SC-2000 Nidek Instruments, Gamagori, Japan) at 3 m.

50  
51  
52 161 Decimal visual acuities were converted to logMAR units using the formula  $\text{logMAR} =$

53  
54  
55 162  $-\log(\text{decimal acuity})^{14}$  for statistical analyses. Furthermore, we assessed the BCVA

56  
57  
58 163 using the ETDRS chart (CSV-1000LanC VectorVision, Ohio, USA) at a distance of

1  
2  
3  
4 164 2.5 m. The luminance for the tests was 85 cd/m<sup>2</sup>, which is recommended for vision  
5  
6  
7 165 testing by the US National Academy of Sciences. It has been adopted by the FDA as  
8  
9  
10 166 the required testing light level for clinical trials. Refraction measurement was done  
11  
12  
13 167 every time visual acuity measurements.

16 168 The MD of retinal sensitivity was determined by the HFA III (Model 850; Carl  
17  
18  
19 169 Zeiss Meditec, Inc., Dublin, CA, USA) using the Swedish Interactive Threshold  
20  
21  
22 170 Algorithm Standard 10-2 protocol. We also analyzed monocular Humphrey Esterman  
23  
24  
25 171 visual field test scores. Visual acuity, visual field, and OCT tests were all performed  
26  
27  
28 172 by a certified orthoptist. We requested the patients to respond to the Japanese  
29  
30  
31 173 version of the NEI VFQ-25<sup>15</sup> to evaluate their subjective symptoms and the quality of  
32  
33  
34 174 life. The NEI VFQ-25 consists of 25 questions that address 12 aspects of daily living  
35  
36  
37 175 as follows: general health, general vision, near vision, distance vision, driving,  
38  
39  
40 176 peripheral vision, color vision, ocular pain, role limitation, dependency, social  
41  
42  
43 177 function, and mental health. Compo 9 comprehensively evaluates nine aspects  
44  
45  
46 178 (general vision, near vision, distance vision, peripheral vision, color vision, role  
47  
48  
49 179 limitation, dependency, social function, and mental health), and was analyzed in this  
50  
51  
52 180 study. VFQ-25 is self-administered and was answered by the patients themselves.  
53  
54  
55 181 The primary outcome was the only protected comparison in this trial.

## 182 **Eligibility criteria**

1  
2  
3  
4 183 Those who met all of the following inclusion criteria and did not have any  
5  
6  
7 184 listed exclusion criteria were considered eligible:  
8  
9

10 185

11  
12  
13 186 **Inclusion criteria**

- 14  
15  
16 187 1. Clinically diagnosed with typical RP, with age  $\geq 20$  years and  $\leq 80$  years.  
17  
18  
19 188 2. HFA 10-2 performed twice within 6 months with a reliability fixation defect rate  
20  
21  
22 189  $< 20\%$ , false positive rate  $< 15\%$ , false negative rate  $< 33\%$ , and a difference in the  
23  
24  
25 190 mean center four points of retinal sensitivity within 5 dB; both values were  $< 30$  dB.  
26  
27  
28 191 3. Decimal visual acuity ranging from 0.1 to 0.7 during screening.  
29  
30  
31 192 4. HFA 10-2 MD values up to -10 dB.  
32  
33  
34 193 5. Provided written informed consent with a sufficient understanding of the  
35  
36  
37 194 responsibilities of participating in this trial.  
38  
39  
40 195 6. Regular hospital visits every 2 weeks for 6 months and follow-up at 36 and 48  
41  
42  
43 196 weeks.  
44  
45  
46 197 7. Could adopt appropriate contraceptive measures during the trial period.  
47  
48

49 198

50  
51  
52 199 **Exclusion criteria**

- 53  
54  
55 200 1. Patients with a history of electrical stimulation treatment for ocular diseases.  
56  
57  
58 201 2. Underwent intraocular surgery within 3 months of beginning this trial.  
59  
60

- 202 3. Modified the dose and usage of isopropyl unoprostone,<sup>16</sup> calcium antagonist, and  
203 helenien within 31 days before the screening examination.
- 204 4. A history of allergy to mydriatic agents and ophthalmic surface anesthetic.
- 205 5. The presence of ocular diseases, such as vitreous macular traction syndrome,  
206 macular edema, epiretinal membrane, myopia with posterior staphyloma, diabetic  
207 retinopathy, the inflammation or infection of accessory visual structures, severe dry  
208 eye, central retinal vein occlusion, ischemic optic neuropathy, optic nerve disease,  
209 Emery-Little cataract  $\geq$  grade 3<sup>17</sup>, or posterior capsular opacification.
- 210 6. Without any deterioration in visual acuity, OCT findings, Goldmann perimetry  
211 findings, and HFA 10-2 visual field sensitivities in last 3 years.
- 212 7. With a pacemaker or defibrillator.
- 213 8. With a history of malignant tumor. However, patients without a relapse for more  
214 than 5 years can be enrolled.
- 215 9. With psychosis, dementia, or mental symptoms that could hinder participation.
- 216 10. With diabetes and poor glycemic control (HbA1c >10.0%)
- 217 11. With hypertension (systole  $\geq$ 180 mmHg and/or diastole  $\geq$ 110 mmHg) and  
218 difficulty in controlling blood pressure by treatment.
- 219 12. With hepatic or renal dysfunction that meets any of the following criteria during  
220 screening: (i) AST, ALT: More than thrice the upper limit of the facility's standard

1  
2  
3  
4 221 value; (ii) Creatinine: More than 1.5 times the upper limit of the facility's standard

5  
6  
7 222 value.

8  
9  
10 223 13. Pregnant, breastfeeding, or planning to get pregnant during the trial period.

11  
12  
13 224 14. Participating in other clinical trials.

14  
15  
16 225 15. Under investigational responsibility (shared) judged inappropriate by doctors for

17  
18  
19 226 participation in this trial.

20  
21  
22 227

23  
24  
25 228 **Registration and randomization**

26  
27  
28 229 After confirming the fulfillment of the eligibility criteria, patients were

29  
30  
31 230 randomly assigned to the TdES and sham groups in a 1:1 allocation via a dynamic

32  
33  
34 231 and centralized randomization procedure, implemented with the DATATRAK

35  
36  
37 232 Electronic Data Capture system (DATATRAK ONE V.14.6.3; <https://>

38  
39  
40 233 [secure.datatrak.net](https://secure.datatrak.net)). The participants were randomized by the Academic Clinical

41  
42  
43 234 Research Center of Osaka University Hospital as a neutral third party, and the

44  
45  
46 235 masking codes will be retained by the Osaka University, thus effectively

47  
48  
49 236 guaranteeing the implementation of masking in clinical trials. An electronic data

50  
51  
52 237 capture system was used for the registration, randomization, and data collection.

53  
54  
55 238 The registration and allocation sequences were generated and managed by the

56  
57  
58 239 Academic Clinical Research Center of Osaka University Hospital. Viedoc's dynamic

1  
2  
3  
4 240 allocation incorporates the Pocock-Simon method, which aims to minimize  
5  
6  
7 241 imbalances in the distribution of patients across treatment groups with respect to  
8  
9  
10 242 prognostic factors that may affect the effect of treatment on patients. This is done by  
11  
12  
13 243 hypothetically assigning a new patient to each treatment group and calculating the  
14  
15  
16 244 level of imbalance for each assignment. Patients are then assigned to treatment  
17  
18  
19 245 groups in such a way that imbalance is minimized. when setting up allocations for  
20  
21  
22 246 the Pocock-Simon method, we set the relative importance of factors and the desired  
23  
24  
25 247 distribution of treatments to be assigned.

26  
27  
28 248 Data collection was managed by the Data Management Office, Clinical Trial  
29  
30  
31 249 Centre of the Chiba University Hospital. The allocation factor is the BCVA (>0.3,  
32  
33  
34 250 <0.4), based on dynamic allocation method.

35  
36  
37 251 Operators are divided into blind group and unblind group. The unblinded  
38  
39  
40 252 operator only operates the device to treat the TdES and sham treatment groups. The  
41  
42  
43 253 blinded operator performs examinations, safety assessment, confirmation of results  
44  
45  
46 254 during trial period. After the trial is completed, they become unblind and perform  
47  
48  
49 255 evaluation of results. Participants are blind, in which they are not known which group  
50  
51  
52 256 they are in. The Statistician accesses and analyzes the data after the test is  
53  
54  
55 257 completed.

56  
57  
58 258

## 259 **Treatment methods**

260 TdES group: The patients received TdES every 2 weeks for 12 sessions.

261 They underwent TdES consisting of 10-ms biphasic pulses at 20 Hz for 30 min. All

262 patients were simultaneously stimulated bilaterally with 1.0 mA at the Chiba

263 University Hospital by physicians. Electrical pulses were obtained from a prototype

264 equipment (Figure 2) jointly developed by Mayo Co., Ltd. (Aichi, Japan). While one

265 electrode was placed on the lower eyelid lateral to the midline of both eyes, the other

266 was placed at the center of the forehead in a similar way as in our previous study.<sup>13</sup>

267 Sham treatment group: The electrodes were attached in place similar to the

268 TdES group; however, they were passed for 30 min without electrical stimulation.

269 The sham treatment was administered at same interval as the live treatment in

270 Treatment method part.

271 The procedure manual for the provision and management of investigational

272 equipment written in Japanese is provided in the online supplementary appendix 3.

## 273 **Post-observation period**

274 Following TdES, all patients entered the post-observation period. They will

275 be admitted at 36 and 48 weeks and evaluated for the applicable items and safety

276 (Table 1).

## 277 **Criteria for the discontinuation of trial treatment**



1  
2  
3  
4 278 The defined criteria for the discontinuation of trial treatment are as follows:  
5  
6

7 279 1) Offer to decline participation in the clinical trial or consent withdrawal.  
8  
9

10 280 2) Found ineligible after enrollment.  
11  
12

13 281 3) Difficult to continue the clinical trial because of an exacerbation of complications.  
14  
15

16 282 4) Difficult to continue the clinical trial owing to adverse events.  
17  
18

19 283 5) Pregnancy.  
20  
21

22 284 6) If the entire clinical trial is discontinued.  
23  
24

25 285 7) Other serious violations of the trial protocol.  
26  
27

28 286 8) Other situations, judged by the PI, in which TdES cannot be continued.  
29  
30

31 287 **Data management, monitoring, safety, and auditing**  
32  
33

34 288 The monitors will ensure the following aspects:  
35  
36

37 289 # The investigational team complied with the study protocol based on Good Clinical  
38  
39  
40 290 Practice (GCP) standards.  
41  
42

43 291 # The data, results, and adverse events (AEs) have been appropriately and  
44  
45  
46 292 accurately recorded in the electronic case report forms.  
47  
48

49 293 # Serious AEs are reported to the trial coordinator and the treatment device provider  
50  
51  
52 294 (Mayo Co., Ltd), and patients meeting the aforementioned criteria have been  
53  
54  
55 295 reported to the IRB.  
56  
57

58 296 The classification of AEs is determined according to the Medical Dictionary  
59  
60

1  
2  
3  
4 297 for Regulatory Activities, Japanese translation MedDRA/J V.22.1 (MedDRA  
5  
6  
7 298 Japanese Maintenance Organization, Tokyo, Japan). All participants with AEs were  
8  
9  
10 299 followed up until they resolved the AE or for 4 weeks after the end of the trial. All  
11  
12  
13 300 serious AEs were reported to the investigators, discussed through an AE reporting  
14  
15  
16 301 system on the web, and reported to the Pharmaceuticals and Medical Devices  
17  
18  
19 302 Agency (PMDA) (as required). All patients will be recruited into a clinical trial  
20  
21  
22 303 insurance provided by the Mitsui Sumitomo Insurance Co., Ltd. for a compensation  
23  
24  
25 304 to those who suffer harm from trial participation.

#### 28 305 **Data monitoring committee**

31 306 The data monitoring committee comprises three clinical trial specialists,  
32  
33  
34 307 including a biostatistician, an ophthalmology specialist, and an otolaryngology  
35  
36  
37 308 specialist who were not included in this study. These data monitoring committee  
38  
39  
40 309 members were all independent. This committee will meet twice a year and will check  
41  
42  
43 310 all data obtained from this trial.

#### 46 311 **Statistical analysis plan**

49 312 We will perform statistical analyses and reporting of this trial in accordance  
50  
51  
52 313 with the Consolidated Standards of Reporting Trials statement guidelines. All  
53  
54  
55 314 efficacy analyses will be primarily based on the complete analysis set, including all  
56  
57  
58 315 patients who received at least one stimulation of the trial treatment. For the primary

1  
2  
3  
4 316 analysis aimed at comparing the effects, we will estimate a change in logMAR from  
5  
6  
7 317 the baseline to 24 weeks and its 95% CI using the analysis of covariance, adjusted  
8  
9  
10 318 for the allocation factor at the registration period.

11  
12  
13 319 To supplement the analysis of the primary endpoints, we will analyze the  
14  
15  
16 320 secondary endpoints of the efficacy. There are no multiplicity adjustments in the  
17  
18  
19 321 analysis of the secondary endpoints. In a secondary analysis, we will use the linear  
20  
21  
22 322 mixed-effects model to compare the secondary efficacy of the change score between  
23  
24  
25 323 groups at each time point. The frequency of AEs and 95% CI were estimated using  
26  
27  
28 324 the Clopper-Pearson exact confidence interval. All comparisons were planned, and  
29  
30  
31 325 all p-values were two-sided. The statistical significance has been set at  $P < 0.05$ . All  
32  
33  
34 326 statistical analyses will be performed using SAS software (version 9.4; SAS, Cary,  
35  
36  
37 327 North Carolina, USA).

#### 38 39 40 328 **Missing values**

41  
42  
43 329 In principle, the missing values are not supplemented. Upon supplementing  
44  
45  
46 330 as necessary, we made the following considerations:

47  
48  
49 331 Consider conducting an analysis using a mixed-effects model repeated  
50  
51  
52 332 measures for missing values because of discontinuation or the omission of efficacy  
53  
54  
55 333 evaluation items.

56  
57  
58 334 In the sensitivity analysis, the stability of the result was confirmed by analyzing

1  
2  
3  
4 335 the observing case (OC), last observation carried forward (LOCF), and multiple  
5  
6  
7 336 imputation (MI). However, the Markov chain Monte Carlo method was used in the MI  
8  
9  
10 337 analysis, and the number of utterances was set to 100. The supplementary method  
11  
12  
13 338 and the results of the sensitivity analysis are reported in the analysis report.

### 16 339 **Sample size estimation**

19 340 The primary objective of the present study was to compare the change in  
20  
21  
22 341 logMAR visual acuity between the treatment and sham groups from week 0 to week  
23  
24  
25 342 24. The null hypothesis was that there would be no significant between-group  
26  
27  
28 343 differences in the change in logMAR visual acuity. The results of our previous study  
29  
30  
31 344 (Study No. K29001) demonstrated an improvement in the logMAR visual acuity.  
32  
33  
34 345 Therefore, we assume the mean and standard deviation of the 24-week change from  
35  
36  
37 346 baseline to be 0.1 logMAR and 0.124 logMAR visual acuity, respectively. In contrast,  
38  
39  
40 347 the placebo effect of the sham group was 1.6 characters (0.032 logMAR visual  
41  
42  
43 348 acuity), as reported in a 2-year-long clinical trial of neovascular age-related macular  
44  
45  
46 349 degeneration.<sup>18</sup> The placebo effect of the sham group was presumably linear with  
47  
48  
49 350 time, and that during evaluation (week 24) of the primary endpoint was assumed to  
50  
51  
52 351 be -0.008 logMAR visual acuity. Therefore, the difference in the TdES and sham  
53  
54  
55 352 groups from the baseline was 0.1 log MAR and -0.008 log MAR, respectively.  
56  
57  
58 353 Moreover, the common standard deviation of the groups was 0.124 log MAR.

1  
2  
3  
4 354 Therefore, we calculated the sample size according to the expected change in the  
5  
6  
7 355 logMAR visual acuity from week 0 to week 24 in the treatment and sham groups (0.1  
8  
9  
10 356 and -0.008, respectively) (SD=0.124). Based on these assumptions, the required  
11  
12  
13 357 sample size was 22 patients per group (2-sided,  $\alpha=.05$ ,  $\beta=.8$ , t-test). Considering a  
14  
15  
16 358 10% dropout rate, we targeted 25 patients per group. Therefore, the target sample  
17  
18  
19 359 size for the randomized trial was 50.

### 360 **Interim analysis and monitoring**

361 No interim analysis has been planned.

### 362 **Patient and public involvement**

363 The patients and general public were not involved in the trial design.

### 364 **ETHICS AND DISSEMINATION**

365 The protocol was approved by the institutional review board at the Chiba  
366 University Hospital and two other institutions, and was registered with the Japan  
367 Registry of Clinical Trials on May 17, 2021. The trial will be conducted in accordance  
368 with the principles of the Declaration of Helsinki, and is in accordance with Good  
369 Clinical Practice standards. We intend to publish results of this ePICO trial in a major  
370 journal.

### 372 **DISCUSSION**

1  
2  
3  
4 373 Previous studies have reported on improved visual function of eyes with  
5  
6  
7 374 traumatic and ischemic optic neuropathy,<sup>19</sup> retinal artery occlusion,<sup>20 21</sup> dry age-  
8  
9  
10 375 related macular dystrophy,<sup>22 23</sup> glaucoma,<sup>24</sup> Leber hereditary optic neuropathy<sup>25</sup>, and  
11  
12  
13 376 RP following TdES with corneal electrodes.

14  
15  
16 377 The previously conducted clinical trial demonstrated no adverse events  
17  
18  
19 378 caused by electrical stimulation. In addition, the mean BCVA and MD of HFA 10-2  
20  
21  
22 379 significantly improved after TdES. Currently, there are no approved electrical  
23  
24  
25 380 stimulation devices for ocular diseases in Japan. We planned this trial to approve  
26  
27  
28 381 ocular electrical stimulation therapy devices for patients with RP.

29  
30  
31 382 The electrodes of the treatment device used in this trial do not touch the  
32  
33  
34 383 corneal or conjunctival surface, thus preventing dry eye symptoms previously  
35  
36  
37 384 reported using transcorneal electrodes.<sup>11</sup> Moreover, no serious adverse events were  
38  
39  
40 385 observed in the previous pilot study.<sup>13</sup> Therefore, our treatment device using skin  
41  
42  
43 386 electrodes has the advantage of being an easier and safer option than one that uses  
44  
45  
46 387 corneal electrodes.

47  
48  
49 388 Morimoto et al. investigated the stimulus conditions (Morimoto2010 Exp Eye  
50  
51  
52 389 Res) that maximized RCG survival rate using optic nerve transected rat. Also, the  
53  
54  
55 390 results of clinical trials in which electrical stimulation was applied to patients with  
56  
57  
58 391 retinitis pigmentosa (schatz2017, Bittner 2018 Acta, Wagner), optic neuropathy

1  
2  
3  
4 392 (Fujikado2006 JJO), and CRAO (Inomata Graefe 2007) were reported. We  
5  
6  
7 393 determined the electrical stimulation settings with reference to the results of those  
8  
9  
10 394 previous studies and conducted our exploratory study with 20 eyes of RP patients.  
11  
12  
13 395 Since improvement in visual acuity and visual field sensitivity was obtained in the  
14  
15  
16 396 study, the same stimulation settings were applied in this trial.

17  
18  
19 397 In the previous clinical trial, the sample size was as small as 10 and the  
20  
21  
22 398 treatment period was as short as 12 weeks. In addition, we did not set a follow-up  
23  
24  
25 399 period, thus could not evaluate the safety and efficacy post-treatment. Therefore, we  
26  
27  
28 400 decided to set the target number of patients to 50 and the treatment period to 24  
29  
30  
31 401 weeks. We also set the post-observation period to 36 weeks and 48 weeks to  
32  
33  
34 402 acquire data post-treatment.

35  
36  
37 403 This trial has several strengths, in addition to larger sample size and longer  
38  
39  
40 404 treatment duration. This is the first randomized, double-masked, and sham-  
41  
42  
43 405 controlled clinical trial of TdES in patients with RP. It is the first step in the clinical  
44  
45  
46 406 application of electrical stimulation therapy for other ocular diseases effectively  
47  
48  
49 407 treated by electrical stimulation. Simultaneously, we are conducting a clinical trial of  
50  
51  
52 408 TdES for central retinal artery occlusion (UMIN000036219) and non-arteritic  
53  
54  
55 409 ischemic optic neuropathy (UMIN000036220) using a similar treatment device. We  
56  
57  
58 410 intend to apply the findings as a set with the results of the aforementioned and

1  
2  
3  
4 411 current ePICO trial for an approval of the TdES device.  
5  
6

7 412 A limitation of this trial is the small target patient size. This can be attributed  
8  
9  
10 413 to the rare occurrence of RP (approximately 1 in 4000 people <sup>26</sup>). However, further  
11  
12  
13 414 studies are needed in the future to investigate the effects of electrical stimulation on  
14  
15  
16 415 the retina in detail. Second, we determined the electrical stimulation settings with  
17  
18  
19 416 reference to the results of previous studies. However, the ideal dose/regimen of  
20  
21  
22 417 electrical stimulation treatment is not yet known.  
23  
24

25 418 In summary, an easier and less invasive treatment method will likely become  
26  
27  
28 419 widespread in patients with RP after confirming the efficacy of TdES in this trial.  
29

30 420  
31  
32  
33  
34  
35  
36  
37  
38  
39  
40  
41  
42  
43  
44  
45  
46  
47  
48  
49  
50  
51  
52  
53  
54  
55  
56  
57  
58  
59  
60



## 421 **Acknowledgements**

422 We would like to thank all staff and patients involved in the study at the three  
423 research sites and the Trial Steering Committee and Data Monitoring Committee for  
424 their ongoing support throughout the trial. We would like to acknowledge the role of  
425 the Clinical Research Centre, Chiba University Hospital, in supporting the ongoing  
426 delivery of the trial at the sites.

427 We also thank Masao Yoshikawa, Daigo Yoshikawa, and Hidetaka Kudo of the Mayo  
428 Company for providing the treatment device and technical help.

429 We would like to thank Editage (<http://www.editage.jp>) for English language editing.

## 430 **Author Contributions**

431 GM, YO, YS, YK, TI, TF, TB, HH and SY made a significant contribution to the  
432 conception and design of the trial protocol. GM was the first author and wrote this  
433 manuscript. GM, YO, TI, TF and HH made a major contribution to the design of this  
434 trial and the development of the original trial protocol. YO, YS, and YK developed the  
435 statistical analysis plan. GM, YO, YS and TF revised the manuscript. TB, HH and SY  
436 supervised the trial. GM, YO, YS, YK, TI, TF, TB, HH and SY have reviewed and  
437 approved the final manuscript.

## 438 **Funding**

1  
2  
3  
4 439 This study was supported by the Japan Agency for Medical Research and

5  
6  
7 440 Development (AMED) under grant number 21hk0102072h0002.

8  
9  
10 441 This study was also supported by a Therapeutics Research Initiative Grant from the

11  
12  
13 442 Chiba University School of Medicine 2019-G1.

14  
15  
16 443 **Competing Interests**

17  
18  
19 444 GM: grants from Novartis outside the submitted work. TB: personal fees from Bayer,

20  
21  
22 445 Kowa, Santen, Senju, and Alcon, and grants and personal fees from Novartis,

23  
24  
25 446 outside the submitted work. SY: grants and personal fees from HOYA, Senju, Pfizer,

26  
27  
28 447 Santen, Alcon Japan, Alcon Pharma, Bayer, and Kowa, personal fees from Nikon,

29  
30  
31 448 Wakamoto, Chuo Sangyo, Daiichi Sankyo, Jamex, Sun Contact Lens, Finedex,

32  
33  
34 449 Novartis, Chugai, and Abbvie, outside the submitted work. HH: personal fees from

35  
36  
37 450 Torii Yakuhin, outside the submitted work. YO, YS, YK, TI, and TF declare no

38  
39  
40 451 competing interests associated with this manuscript. Mayo Co., Ltd. had no role in

41  
42  
43 452 the study design, data collection, data analysis, data interpretation, or writing of the

44  
45  
46 453 protocol.

47  
48  
49 454 **Patient consent for publication**

50  
51  
52 455 Obtained.

53  
54  
55 456 **Ethics approval**

56  
57  
58 457 The IRB of all three institutions has approved the trial.

1  
2  
3  
4 458 This trial will be conducted in accordance with the Ordinance on the Standards for  
5  
6  
7 459 the Implementation of Clinical Trials (GCP Ordinance) and the principles of the  
8  
9  
10 460 Declaration of Helsinki of the World Medical Association. All participants will receive  
11  
12  
13 461 adequate information about the purpose, nature, benefits, and possible risks of this  
14  
15  
16 462 trial, and alternative therapeutic choices by investigator, using an informed consent  
17  
18  
19 463 form approved by the IRB at the Chiba University Hospital and two other institutions.  
20  
21  
22 464 Participant-signed informed consent forms were required to be enrolled in this trial.  
23  
24

#### 25 465 **ORCID ID**

26  
27  
28 466 Gen Miura <http://orcid.org/0000-0001-6288-8840>  
29  
30

31 467  
32  
33

#### 34 468 **References**

- 35  
36  
37 469 1. Galli-Resta L, Ensini M, Fusco E, et al. Afferent spontaneous electrical activity  
38  
39  
40 470 promotes the survival of target cells in the developing retinotectal system of the  
41  
42  
43 471 rat. *J Neurosci* 1993;13(1):243-50. doi: 10.1523/jneurosci.13-01-00243.1993  
44  
45  
46 472 [published Online First: 1993/01/01]
- 47  
48  
49 473 2. Al-Majed AA, Neumann CM, Brushart TM, et al. Brief electrical stimulation promotes  
50  
51  
52 474 the speed and accuracy of motor axonal regeneration. *J Neurosci*  
53  
54  
55 475 2000;20(7):2602-8. doi: 10.1523/jneurosci.20-07-02602.2000 [published  
56  
57  
58 476 Online First: 2000/03/24]  
59  
60

- 1  
2  
3  
4 477 3. Morimoto T, Miyoshi T, Fujikado T, et al. Electrical stimulation enhances the survival  
5  
6  
7 478 of axotomized retinal ganglion cells in vivo. *Neuroreport* 2002;13(2):227-30.  
8  
9  
10 479 doi: 10.1097/00001756-200202110-00011 [published Online First: 2002/03/15]  
11  
12  
13 480 4. Morimoto T, Miyoshi T, Matsuda S, et al. Transcorneal electrical stimulation rescues  
14  
15  
16 481 axotomized retinal ganglion cells by activating endogenous retinal IGF-1  
17  
18  
19 482 system. *Investigative ophthalmology & visual science* 2005;46(6):2147-55. doi:  
20  
21  
22 483 10.1167/iovs.04-1339 [published Online First: 2005/05/26]  
23  
24  
25 484 5. Morimoto T, Fujikado T, Choi JS, et al. Transcorneal electrical stimulation promotes  
26  
27  
28 485 the survival of photoreceptors and preserves retinal function in royal college of  
29  
30  
31 486 surgeons rats. *Investigative ophthalmology & visual science* 2007;48(10):4725-  
32  
33  
34 487 32. doi: 10.1167/iovs.06-1404 [published Online First: 2007/09/28]  
35  
36  
37 488 6. Morimoto T, Kanda H, Kondo M, et al. Transcorneal electrical stimulation promotes  
38  
39  
40 489 survival of photoreceptors and improves retinal function in rhodopsin P347L  
41  
42  
43 490 transgenic rabbits. *Investigative ophthalmology & visual science*  
44  
45  
46 491 2012;53(7):4254-61. doi: 10.1167/iovs.11-9067 [published Online First:  
47  
48  
49 492 2012/05/19]  
50  
51  
52 493 7. Yu H, Enayati S, Chang K, et al. Noninvasive Electrical Stimulation Improves  
53  
54  
55 494 Photoreceptor Survival and Retinal Function in Mice with Inherited  
56  
57  
58 495 Photoreceptor Degeneration. *Investigative ophthalmology & visual science*

- 1  
2  
3  
4 496 2020;61(4):5. doi: 10.1167/iovs.61.4.5 [published Online First: 2020/04/10]  
5  
6  
7 497 8. Schatz A, Röck T, Naycheva L, et al. Transcorneal electrical stimulation for patients  
8  
9  
10 498 with retinitis pigmentosa: a prospective, randomized, sham-controlled  
11  
12  
13 499 exploratory study. *Investigative ophthalmology & visual science*  
14  
15  
16 500 2011;52(7):4485-96. doi: 10.1167/iovs.10-6932 [published Online First:  
17  
18  
19 501 2011/04/07]  
20  
21  
22 502 9. Bittner AK, Seger K, Salveson R, et al. Randomized controlled trial of electro-  
23  
24  
25 503 stimulation therapies to modulate retinal blood flow and visual function in  
26  
27  
28 504 retinitis pigmentosa. *Acta ophthalmologica* 2018;96(3):e366-e76. doi:  
29  
30  
31 505 10.1111/aos.13581 [published Online First: 2017/11/14]  
32  
33  
34 506 10. Perin C, Viganò B, Piscitelli D, et al. Non-invasive current stimulation in vision  
35  
36  
37 507 recovery: a review of the literature. *Restor Neurol Neurosci* 2020;38(3):239-50.  
38  
39  
40 508 doi: 10.3233/rnn-190948 [published Online First: 2019/12/31]  
41  
42  
43 509 11. Schatz A, Pach J, Gosheva M, et al. Transcorneal Electrical Stimulation for  
44  
45  
46 510 Patients With Retinitis Pigmentosa: A Prospective, Randomized, Sham-  
47  
48  
49 511 Controlled Follow-up Study Over 1 Year. *Investigative ophthalmology & visual*  
50  
51  
52 512 *science* 2017;58(1):257-69. doi: 10.1167/iovs.16-19906 [published Online First:  
53  
54  
55 513 2017/01/24]  
56  
57  
58 514 12. Jackson TL, Mandava N, Quiroz-Mercado H, et al. Intravitreal quantum dots for  
59  
60

- 1  
2  
3  
4 515 retinitis pigmentosa: a first-in-human safety study. *Nanomedicine (Lond)*  
5  
6  
7 516 2021;16(8):617-26. doi: 10.2217/nnm-2020-0471 [published Online First:  
8  
9  
10 517 2021/03/20]
- 11  
12  
13 518 13. Miura G, Sugawara T, Kawasaki Y, et al. Clinical Trial to Evaluate Safety and  
14  
15  
16 519 Efficacy of Transdermal Electrical Stimulation on Visual Functions of Patients  
17  
18  
19 520 with Retinitis Pigmentosa. *Scientific reports* 2019;9(1):11668. doi:  
20  
21  
22 521 10.1038/s41598-019-48158-5 [published Online First: 2019/08/14]
- 23  
24  
25 522 14. Holladay JT. Visual acuity measurements. *J Cataract Refract Surg*  
26  
27  
28 523 2004;30(2):287-90. doi: 10.1016/j.jcrs.2004.01.014 [published Online First:  
29  
30  
31 524 2004/03/20]
- 32  
33  
34 525 15. Suzukamo Y, Oshika T, Yuzawa M, et al. Psychometric properties of the 25-item  
35  
36  
37 526 National Eye Institute Visual Function Questionnaire (NEI VFQ-25), Japanese  
38  
39  
40 527 version. *Health Qual Life Outcomes* 2005;3:65. doi: 10.1186/1477-7525-3-65  
41  
42  
43 528 [published Online First: 2005/10/27]
- 44  
45  
46 529 16. Yamamoto S, Sugawara T, Murakami A, et al. Topical isopropyl unoprostone for  
47  
48  
49 530 retinitis pigmentosa: microperimetric results of the phase 2 clinical study.  
50  
51  
52 531 *Ophthalmology and therapy* 2012;1(1):5-5. doi: 10.1007/s40123-012-0005-9  
53  
54  
55 532 [published Online First: 2012/09/06]
- 56  
57  
58 533 17. Emery JM, Little JH. Phacoemulsification and aspiration of cataracts : surgical  
59  
60

- 1  
2  
3  
4 534 techniques, complications, and results: Mosby 1979.  
5  
6  
7 535 18. Rosenfeld PJ, Brown DM, Heier JS, et al. Ranibizumab for neovascular age-  
8  
9  
10 536 related macular degeneration. *N Engl J Med* 2006;355(14):1419-31. doi:  
11  
12  
13 537 10.1056/NEJMoa054481 [published Online First: 2006/10/06]  
14  
15  
16 538 19. Fujikado T, Morimoto T, Matsushita K, et al. Effect of transcorneal electrical  
17  
18  
19 539 stimulation in patients with nonarteritic ischemic optic neuropathy or traumatic  
20  
21  
22 540 optic neuropathy. *Japanese journal of ophthalmology* 2006;50(3):266-73. doi:  
23  
24  
25 541 10.1007/s10384-005-0304-y [published Online First: 2006/06/13]  
26  
27  
28 542 20. Inomata K, Shinoda K, Ohde H, et al. Transcorneal electrical stimulation of retina  
29  
30  
31 543 to treat longstanding retinal artery occlusion. *Graefe's archive for clinical and*  
32  
33  
34 544 *experimental ophthalmology = Albrecht von Graefes Archiv fur klinische und*  
35  
36  
37 545 *experimentelle Ophthalmologie* 2007;245(12):1773-80. doi: 10.1007/s00417-  
38  
39  
40 546 007-0610-9 [published Online First: 2007/06/27]  
41  
42  
43 547 21. Oono S, Kurimoto T, Kashimoto R, et al. Transcorneal electrical stimulation  
44  
45  
46 548 improves visual function in eyes with branch retinal artery occlusion. *Clinical*  
47  
48  
49 549 *ophthalmology (Auckland, NZ)* 2011;5:397-402. doi: 10.2147/ophth.S17751  
50  
51  
52 550 [published Online First: 2011/04/19]  
53  
54  
55 551 22. Shinoda K, Imamura Y, Matsuda S, et al. Transcutaneous electrical retinal  
56  
57  
58 552 stimulation therapy for age-related macular degeneration. *Open Ophthalmol J*  
59  
60

- 1  
2  
3  
4 553 2008;2:132-6. doi: 10.2174/1874364100802010132 [published Online First:  
5  
6  
7 554 2008/01/01]  
8  
9  
10 555 23. Chaikin L, Kashiwa K, Bennet M, et al. Microcurrent stimulation in the treatment of  
11  
12  
13 556 dry and wet macular degeneration. *Clinical ophthalmology (Auckland, NZ)*  
14  
15  
16 557 2015;9:2345-53. doi: 10.2147/opth.S92296 [published Online First:  
17  
18  
19 558 2016/01/01]  
20  
21  
22 559 24. Ota Y, Ozeki N, Yuki K, et al. The Efficacy of Transcorneal Electrical Stimulation  
23  
24  
25 560 for the Treatment of Primary Open-angle Glaucoma: A Pilot Study. *Keio J Med*  
26  
27  
28 561 2018;67(3):45-53. doi: 10.2302/kjm.2017-0015-OA [published Online First:  
29  
30  
31 562 2018/02/09]  
32  
33  
34 563 25. Kurimoto T, Ueda K, Mori S, et al. A Single-Arm, Prospective, Exploratory Study  
35  
36  
37 564 to Preliminarily Test Effectiveness and Safety of Skin Electrical Stimulation for  
38  
39  
40 565 Leber Hereditary Optic Neuropathy. *J Clin Med* 2020;9(5) doi:  
41  
42  
43 566 10.3390/jcm9051359 [published Online First: 2020/05/10]  
44  
45  
46 567 26. Hartong DT, Berson EL, Dryja TP. Retinitis pigmentosa. *Lancet*  
47  
48  
49 568 2006;368(9549):1795-809. doi: 10.1016/s0140-6736(06)69740-7 [published  
50  
51  
52 569 Online First: 2006/11/23]  
53  
54  
55 570  
56  
57 571  
58  
59  
60



1  
2  
3  
4 572 **Figure legend**

5  
6  
7 573 **Figure 1.** Trial design

8  
9  
10 574 TdES: Transdermal electrical stimulation.

11  
12  
13 575

14  
15  
16 576 **Figure 2.** The prototype equipment for transdermal electrical stimulation.

17  
18  
19 577

20  
21  
22  
23  
24  
25  
26  
27  
28  
29  
30  
31  
32  
33  
34  
35  
36  
37  
38  
39  
40  
41  
42  
43  
44  
45  
46  
47  
48  
49  
50  
51  
52  
53  
54  
55  
56  
57  
58  
59  
60

For peer review only

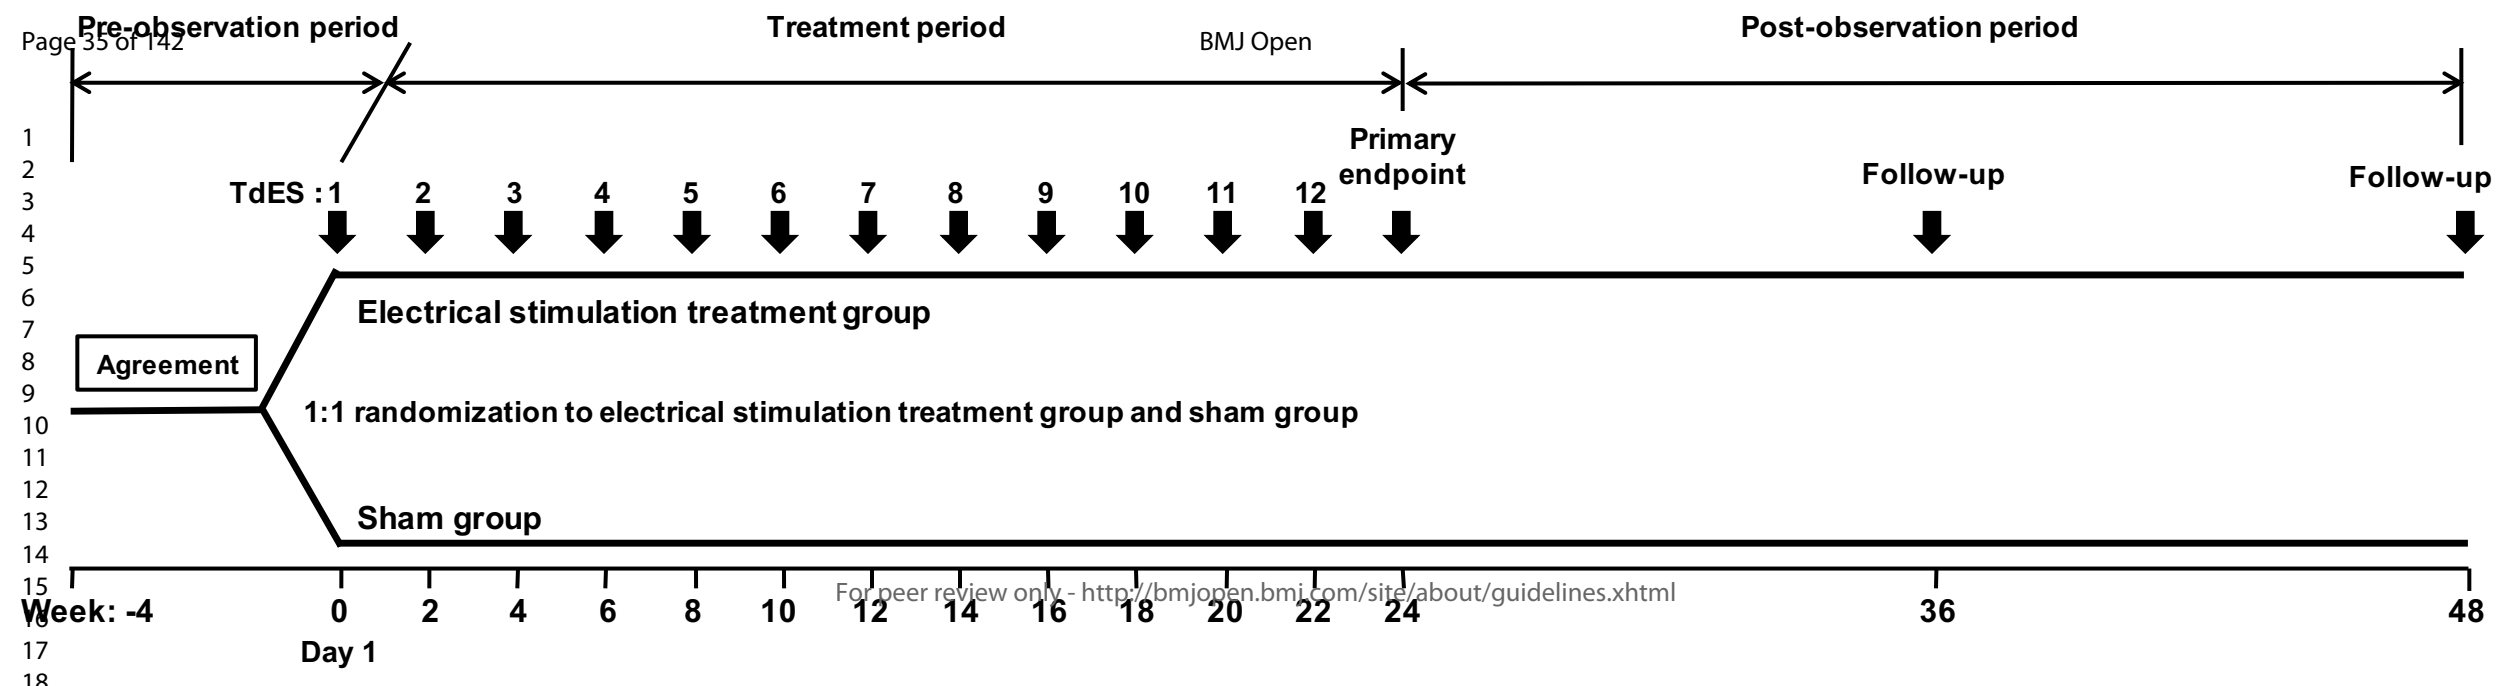

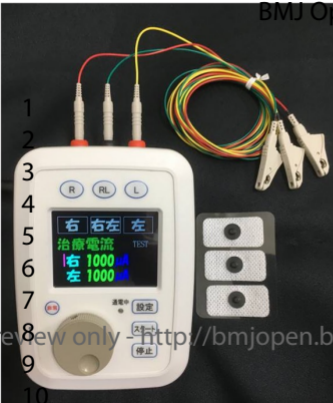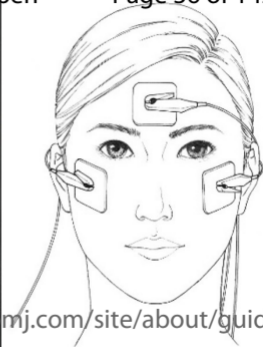

# 治験実施計画書

## 網膜色素変性を対象とした経皮膚電気刺激装置の有効性及び安全性を検証するシャム対照二重遮蔽比較試験

版数 2.1 版  
作成日 2021 年 5 月 25 日

### 改訂履歴

| 作成日             | 版数    |
|-----------------|-------|
| 2021 年 4 月 1 日  | 1.0 版 |
| 2021 年 5 月 10 日 | 2.0 版 |
| 2021 年 5 月 25 日 | 2.1 版 |

治験実施計画書番号 CCRC1804

### 機密情報に関する注意

本治験実施計画書は機密情報であり、本治験に参加する治験責任医師、治験分担医師、治験協力者、実施医療機関、治験審査委員会、データモニタリング委員会に対して提供されるものです。よって、被験者に説明する場合を除き、治験責任医師及び治験機器提供者である有限会社メイヨーの文書による同意なしに、いかなる第三者にも開示し、又は本治験の目的以外に利用することはできません。また、本治験の結果の一部又は全部を学会、雑誌等外部に発表する場合には、治験責任医師及び有限会社メイヨーの承諾が必要となりますので、あらかじめ、治験調整医師までご連絡頂きますようお願いいたします。

1  
2  
3  
4 <目次>

5 0. 治験の概要 ..... 8

6 1. 緒言 ..... 12

7 1.1. 治験の背景 ..... 12

8 1.2. 網膜色素変性に対する標準治療 ..... 13

9 1.3. 治験機器の概要 ..... 13

10 1.3.1. 使用方法 ..... 13

11 1.3.2. 非臨床成績 ..... 14

12 1.3.3. 臨床試験成績 ..... 14

13 1.3.3.1. 国内臨床成績 ..... 14

14 1.3.3.2. 海外臨床試験成績 ..... 14

15 1.3.4. 予想される有害事象及び不具合等 ..... 15

16 2. 治験の目的と治験実施の妥当性 ..... 15

17 2.1. 目的 ..... 15

18 2.2. 本治験実施の妥当性 ..... 15

19 3. 対象患者 ..... 15

20 3.1. 選択基準 ..... 15

21 3.2. 除外基準 ..... 16

22 4. 被験者の同意 ..... 18

23 4.1. 同意文書及びその他の説明文書の作成並びに改訂 ..... 18

24 4.2. 同意取得の時期と方法 ..... 18

25 4.3. 被験者に対する説明事項 ..... 19

26 5. 治験の方法 ..... 20

27 5.1. 治験のデザイン ..... 20

28 5.2. 目標被験者数と治験実施期間 ..... 21

29 5.3. 施設登録 ..... 21

30 5.3.1. 施設登録 ..... 21

31 5.3.2. 施設登録先 ..... 21

32 5.4. 症例登録 ..... 21

33 5.4.1. 症例登録・割付 ..... 21

34 5.4.2. 症例登録先 ..... 22

35 5.4.3. 割付調整因子 ..... 22

36 5.4.4. 割付情報の管理 ..... 22

37 5.5. 遮蔽化 ..... 22

38 5.6. コードの開鍵 ..... 22

39 5.7. 緊急コード開封の手続き ..... 22

40  
41  
42  
43  
44  
45  
46  
47  
48  
49  
50  
51  
52  
53  
54  
55  
56  
57  
58  
59  
60

|    |                                  |    |
|----|----------------------------------|----|
| 1  |                                  |    |
| 2  |                                  |    |
| 3  |                                  |    |
| 4  | 5.8. 登録されなかった被験者の取り扱い .....      | 22 |
| 5  | 5.9. 個々の症例の中止基準 .....            | 23 |
| 6  |                                  |    |
| 7  | 5.10. 併用可能薬及び併用可能療法 .....        | 23 |
| 8  |                                  |    |
| 9  | 5.11. 併用禁止薬及び併用禁止療法 .....        | 23 |
| 10 | 5.12. 併用制限薬 .....                | 23 |
| 11 |                                  |    |
| 12 | 5.13. 治験中止後の対応 .....             | 23 |
| 13 | 6. 治験機器 .....                    | 24 |
| 14 |                                  |    |
| 15 | 6.1. 外観及び構成 .....                | 24 |
| 16 | 6.2. 安全装置 .....                  | 25 |
| 17 |                                  |    |
| 18 | 6.3. 作動原理 .....                  | 25 |
| 19 |                                  |    |
| 20 | 6.4. 品質 .....                    | 25 |
| 21 | 6.4.1. 安全性 .....                 | 26 |
| 22 | 6.4.2. 性能 .....                  | 26 |
| 23 | 6.4.3. 製造 .....                  | 26 |
| 24 |                                  |    |
| 25 | 6.5. 包装・表示 .....                 | 27 |
| 26 |                                  |    |
| 27 | 6.6. 管理方法 .....                  | 27 |
| 28 |                                  |    |
| 29 | 7. 観察・検査・評価項目、方法及び実施時期 .....     | 28 |
| 30 |                                  |    |
| 31 | 7.1. 実施スケジュールと手順 .....           | 28 |
| 32 | 7.1.1. スクリーニング検査 .....           | 30 |
| 33 | 7.1.2. 被験者の情報 .....              | 31 |
| 34 | 7.1.3. 観察・検査・評価項目 .....          | 31 |
| 35 |                                  |    |
| 36 | 8. 有害事象発生時の取り扱い .....            | 35 |
| 37 |                                  |    |
| 38 | 8.1. 有害事象、不具合及び機器関連有害事象の定義 ..... | 35 |
| 39 | 8.2. 有害事象又は不具合発生時の被験者への対応 .....  | 35 |
| 40 | 8.3. 報告の対象となる有害事象及び不具合 .....     | 35 |
| 41 | 8.4. 有害事象及び不具合発生時の報告手順 .....     | 35 |
| 42 | 8.5. 有害事象及び不具合の評価に必要な記載内容 .....  | 35 |
| 43 |                                  |    |
| 44 | 8.5.1. 有害事象 .....                | 35 |
| 45 | 8.5.2. 不具合 .....                 | 36 |
| 46 | 8.5.3. 有害事象の回復性と治験機器との因果関係 ..... | 36 |
| 47 | 8.5.3.1. 治験機器との因果関係 .....        | 36 |
| 48 | 8.5.3.2. 治験機器に関する処置 .....        | 36 |
| 49 | 8.5.3.3. 転帰 .....                | 37 |
| 50 | 8.6. 重篤な有害事象発生時の取り扱い .....       | 37 |
| 51 |                                  |    |
| 52 | 8.6.1. 重篤な有害事象の定義 .....          | 37 |
| 53 | 8.6.2. 報告の対象となる重篤な有害事象 .....     | 37 |
| 54 |                                  |    |
| 55 |                                  |    |
| 56 |                                  |    |
| 57 |                                  |    |
| 58 |                                  |    |
| 59 |                                  |    |
| 60 |                                  |    |

|    |                                                |    |
|----|------------------------------------------------|----|
| 1  |                                                |    |
| 2  |                                                |    |
| 3  |                                                |    |
| 4  | 8.6.3. 重篤な有害事象等の報告手順 .....                     | 38 |
| 5  | 9. 評価項目 .....                                  | 39 |
| 6  | 9.1. 主要評価項目 .....                              | 39 |
| 7  | 9.2. 副次評価項目 .....                              | 39 |
| 8  | 9.3. 探索的評価項目 .....                             | 39 |
| 9  | 9.4. 安全性評価項目 .....                             | 40 |
| 10 | 10. 統計学的事項 .....                               | 40 |
| 11 | 10.1. 解析対象集団 .....                             | 41 |
| 12 | 10.1.1. 安全性解析対象集団 .....                        | 41 |
| 13 | 10.1.2. 最大の解析対象集団 .....                        | 41 |
| 14 | 10.1.3. 治験実施計画書に適合した対象集団 .....                 | 41 |
| 15 | 10.2. 目標症例数と設定根拠 .....                         | 41 |
| 16 | 10.3. 症例の取り扱い .....                            | 41 |
| 17 | 10.4. データの取り扱い .....                           | 42 |
| 18 | 10.5. 統計解析項目及び解析計画 .....                       | 42 |
| 19 | 10.5.1. 被験者背景の解析 .....                         | 42 |
| 20 | 10.5.2. 安全性及び有効性の解析 .....                      | 43 |
| 21 | 10.5.2.1. 主たる解析 .....                          | 43 |
| 22 | 10.5.2.2. 副次解析 .....                           | 43 |
| 23 | 10.5.2.3. 探索的解析 .....                          | 43 |
| 24 | 10.5.3. 安全性の解析 .....                           | 43 |
| 25 | 10.6. データモニタリング委員会 .....                       | 43 |
| 26 | 10.7. 最終解析 .....                               | 43 |
| 27 | 11. 治験実施計画書の遵守及び逸脱 .....                       | 43 |
| 28 | 12. 治験実施計画書、症例報告書又は解析計画に関する変更 .....            | 44 |
| 29 | 12.1. 治験実施計画書及び症例報告書の改訂 .....                  | 44 |
| 30 | 12.2. 統計解析計画の変更 .....                          | 44 |
| 31 | 13. 治験の中止、中断又は終了 .....                         | 44 |
| 32 | 13.1. 治験全体での中止又は中断の基準 .....                    | 44 |
| 33 | 13.2. 治験全体での中止又は中断する場合の手続き .....               | 44 |
| 34 | 13.3. 個々の実施医療機関での治験の中止又は中断する場合の手続き .....       | 45 |
| 35 | 13.4. 治験の終了 .....                              | 45 |
| 36 | 14. データマネジメント .....                            | 45 |
| 37 | 14.1. データマネジメントの手順 .....                       | 45 |
| 38 | 14.2. データの収集 .....                             | 45 |
| 39 | 14.3. 症例報告書に直接記入され、かつ原資料（原データ）と解すべき資料の特定 ..... | 45 |
| 40 |                                                |    |
| 41 |                                                |    |
| 42 |                                                |    |
| 43 |                                                |    |
| 44 |                                                |    |
| 45 |                                                |    |
| 46 |                                                |    |
| 47 |                                                |    |
| 48 |                                                |    |
| 49 |                                                |    |
| 50 |                                                |    |
| 51 |                                                |    |
| 52 |                                                |    |
| 53 |                                                |    |
| 54 |                                                |    |
| 55 |                                                |    |
| 56 |                                                |    |
| 57 |                                                |    |
| 58 |                                                |    |
| 59 |                                                |    |
| 60 |                                                |    |

|    |                                         |    |
|----|-----------------------------------------|----|
| 1  |                                         |    |
| 2  |                                         |    |
| 3  |                                         |    |
| 4  | 15. 記録の保存 .....                         | 46 |
| 5  | 15.1. 実施医療機関による記録の保存 .....              | 46 |
| 6  | 15.2. 治験責任医師による記録の保存 .....              | 46 |
| 7  |                                         |    |
| 8  | 16. 原資料の直接閲覧 .....                      | 46 |
| 9  |                                         |    |
| 10 | 17. 治験の品質管理及び品質保証 .....                 | 46 |
| 11 | 17.1. 品質管理 .....                        | 46 |
| 12 | 17.2. 品質保証 .....                        | 47 |
| 13 |                                         |    |
| 14 | 18. 倫理及び GCP .....                      | 47 |
| 15 |                                         |    |
| 16 | 19. 治験審査委員会 .....                       | 47 |
| 17 |                                         |    |
| 18 | 20. 健康被害補償及び保険 .....                    | 47 |
| 19 | 21. 治験に関する費用負担 .....                    | 48 |
| 20 | 22. 研究資金及び利益相反 .....                    | 48 |
| 21 |                                         |    |
| 22 | 23. 治験のデータベース登録 .....                   | 48 |
| 23 |                                         |    |
| 24 | 24. 付録 .....                            | 48 |
| 25 | 25. 治験実施体制 .....                        | 48 |
| 26 | 26. SARS-CoV-2 流行時における治験手順の一時的な変更 ..... | 48 |
| 27 |                                         |    |
| 28 | 27. 参考資料・文献リスト .....                    | 49 |
| 29 |                                         |    |
| 30 |                                         |    |
| 31 |                                         |    |
| 32 |                                         |    |
| 33 |                                         |    |
| 34 |                                         |    |
| 35 |                                         |    |
| 36 |                                         |    |
| 37 |                                         |    |
| 38 |                                         |    |
| 39 |                                         |    |
| 40 |                                         |    |
| 41 |                                         |    |
| 42 |                                         |    |
| 43 |                                         |    |
| 44 |                                         |    |
| 45 |                                         |    |
| 46 |                                         |    |
| 47 |                                         |    |
| 48 |                                         |    |
| 49 |                                         |    |
| 50 |                                         |    |
| 51 |                                         |    |
| 52 |                                         |    |
| 53 |                                         |    |
| 54 |                                         |    |
| 55 |                                         |    |
| 56 |                                         |    |
| 57 |                                         |    |
| 58 |                                         |    |
| 59 |                                         |    |
| 60 |                                         |    |



1  
2  
3  
4  
5  
6  
7  
8  
9  
10  
11  
12  
13  
14  
15  
16  
17  
18  
19  
20  
21  
22  
23  
24  
25  
26  
27  
28  
29  
30  
31  
32  
33  
34  
35  
36  
37  
38  
39  
40  
41  
42  
43  
44  
45  
46  
47  
48  
49  
50  
51  
52  
53  
54  
55  
56  
57  
58  
59  
60

<略語・用語集>

本治験実施計画書における略語・略記・用語の定義を以下に示す。

| 略号・略記・用語 | 定義                                         |                       |
|----------|--------------------------------------------|-----------------------|
| AC       | alternating current                        | 交流電流                  |
| Ag/AgCl  | silver/silver chloride                     | 銀/塩化銀                 |
| ALT      | alanine aminotransferase                   | アラニンアミノ基転移酵素 (GPT)    |
| ALP      | alkaline phosphatase                       | アルカリホスファターゼ           |
| AST      | aspartate aminotransferase                 | アスパラギン酸アミノ基転移酵素 (GOT) |
| BDNF     | brain-derived neurotrophic factor          | 脳由来神経栄養因子             |
| BRAO     | branch retinal artery occlusion            | 網膜動脈分枝閉塞症             |
| BUN      | blood urea nitrogen                        | 尿素窒素                  |
| CNTF     | ciliary neurotrophic factor                | 毛様体神経栄養因子             |
| COX-2    | cyclooxygenase-2                           | シクロオキシゲナーゼ-2          |
| CRC      | clinical research coordinator              | 治験コーディネーター            |
| CRP      | C-reactive protein                         | C反応性蛋白                |
| dB       | decibel                                    | デシベル                  |
| DC       | direct current                             | 直流電流                  |
| ERG      | electroretinogram                          | 網膜電図                  |
| ETDRS    | early treatment diabetic retinopathy study | 早期糖尿病網膜症治療調査          |
| EZ       | ellipsoid zone                             | エリプソイドゾーン             |
| FAS      | full analysis set                          | 最大の解析対象集団             |
| FGF1     | fibroblast growth factor                   | 線維芽細胞増殖因子 1           |
| GOT      | glutamic oxaloacetic transaminase          | グルタミン酸オキサロ酢酸トランスアミナーゼ |
| GP       | goldmann perimetry                         | ゴールドマン視野計             |
| GPT      | glutamic-pyruvic transaminase              | グルタミン酸ピルビン酸トランスアミナーゼ  |
| HbA1c    | hemoglobin A1c                             | 糖化ヘモグロビン              |
| HFA      | humphrey field analyzer                    | ハンフリー視野計              |
| Hz       | hertz                                      | ヘルツ                   |

|            |                                                                  |                               |
|------------|------------------------------------------------------------------|-------------------------------|
| IGF-1      | insulin-like growth factors                                      | インスリン様成長因子-1                  |
| IL-1b      | interleukin-1b                                                   | サイトカイン(インターロイキン-1 ベータ)        |
| IL-6       | interleukin-6                                                    | サイトカイン (インターロイキン-6)           |
| IL-10      | interleukin-10                                                   | サイトカイン (インターロイキン-10)          |
| IS/OS      | photoreceptor inner/outersegment junction                        | 視細胞内節外節接合部                    |
| LLT        | lowest level terms                                               | 下層語                           |
| mA         | milliampere                                                      | ミリアンペア                        |
| MD         | mean deviation                                                   | 平均偏差                          |
| MedDRA/J   | medical dictionary for regulatory activities/ Japanese           | 医薬品規制調和国際会議 (ICH) 国際医薬用語集日本語版 |
| mmHg       | millimeter Hg                                                    | ミリメートル水銀柱                     |
| msec       | milli second                                                     | ミリ秒                           |
| NGSP       | national glycohemoglobin standardization program                 | 全米グリコヘモグロビン標準化プログラム           |
| NF-κB      | nuclear factor kappa-light-chain-enhancer of activated B cells   | 核内因子 κB                       |
| NEI VFQ 25 | the 25-item national eye institute visual function questionnaire | 米国国立眼病研究所 25 項目視覚機能質問票        |
| OCT        | optical coherence tomography                                     | 光干渉断層計                        |
| PMDA       | pharmaceuticals and medical devices agency                       | 独立行政法人 医薬品医療機器総合機構            |
| PPS        | per protocol set                                                 | 治験実施計画書に適合した対象集団              |
| PT         | preferred terms                                                  | 基本語                           |
| RP         | retinitis pigmentosa                                             | 網膜色素変性                        |
| SOC        | system organ class                                               | 器官別大分類                        |
| TdES       | transdermal electrical stimulation                               | 経皮膚電気刺激                       |
| TES        | trancorneal electrical stimulation                               | 経角膜電気刺激                       |
| TNF-α      | tumor necrosis factor-α                                          | 腫瘍壊死因子                        |
| UMIN       | university hospital medical information network                  | 大学病院医療情報ネットワーク                |
| VFQ        | visual function quetionnaire                                     | 視機能質問票                        |

## 0. 治験の概要

|        |                                                                                                                                                                                                                                                                                                                                                                                                                                                                                                                                                                                                                                                                                       |
|--------|---------------------------------------------------------------------------------------------------------------------------------------------------------------------------------------------------------------------------------------------------------------------------------------------------------------------------------------------------------------------------------------------------------------------------------------------------------------------------------------------------------------------------------------------------------------------------------------------------------------------------------------------------------------------------------------|
| 治験課題名  | 網膜色素変性を対象とした経皮膚電気刺激装置の有効性及び安全性を検証するシヤム対照二重遮蔽比較試験                                                                                                                                                                                                                                                                                                                                                                                                                                                                                                                                                                                                                                      |
| 治験の目的  | 網膜色素変性患者に対する、皮膚電極を用いた経皮膚電気刺激による視機能の維持・改善効果及び安全性をシヤム群と比較し検証すること。                                                                                                                                                                                                                                                                                                                                                                                                                                                                                                                                                                                                                       |
| 治験デザイン | ランダム化、二重遮蔽、シヤム対照、多施設共同、検証的                                                                                                                                                                                                                                                                                                                                                                                                                                                                                                                                                                                                                                                            |
| 被験機器   | <p>1) 概要<br/>電気刺激用皮膚電極を両眼の下眼瞼耳側及び前額部の中央の皮膚に装着し、各種条件下である一定の電気刺激を与え、網膜及び視神経疾患等を対象として治療を行うための機器である。</p> <p>2) 構成<br/>「電気刺激装置」、「皮膚電極」とそれらを繋ぐ「電極接続ケーブル」から構成されている。</p> <p>3) 仕様</p> <p>(1) 電気刺激装置</p> <ul style="list-style-type: none"> <li>・ 電流値 : 0~2,000 <math>\mu</math> A</li> <li>・ 刺激頻度 : 20 Hz</li> <li>・ 出力波形 : 正負両相</li> <li>・ パルス幅 : 各相 10 msec</li> </ul> <p>(2) 皮膚電極 (積水化成工業 (株))</p> <ul style="list-style-type: none"> <li>・ 大きさ : 19×38 mm のディスプレイ電極</li> <li>・ 電極素子 : Ag/AgCl</li> <li>・ 基材 : 不織布</li> <li>・ ゲル : 導電性粘着ゲル</li> </ul> <p>(3) 電気容量</p> <p>AC アダプタ定格 (入力) AC 100V 50/60 Hz 30 VA<br/>AC アダプタ定格 (出力) DC 5V 4 A</p> <p>(4) 重量 : 約 300 g、寸法 : 140×100×69 mm</p> |
| 選択基準   | <p>以下のすべての条件に該当する患者を対象とする。ただし、2)~4) に関しては評価眼に関して、以下の基準を満たすこと。</p> <ol style="list-style-type: none"> <li>1) 同意取得時の年齢が 20 歳以上 80 歳未満の定型網膜色素変性患者。</li> <li>2) 信頼性 (固視不良率 20% 未満、偽陽性率 15% 未満、偽陰性率 33% 未満) のある静的視野検査 (HFA) 10-2 プログラムの計測値を示す患者。</li> <li>3) 小数視力が 0.1~0.7 の患者。</li> <li>4) 静的視野検査 (HFA) 10-2 プログラム MD (Mean Deviation : MD) 値が -10 dB 未満の患者。</li> <li>5) 本治験の参加にあたり十分な説明を受けた後、十分な理解のうえ、本人の自由意思による文書同意が得られた患者。</li> <li>6) 2 週おきに 24 週間の通院が可能でかつ、36 週及び 48 週の後観察の通院が可能な患者。</li> <li>7) 治験期間中に適切な避妊措置を実施することが可能な患者。</li> </ol>                                                                                                                                              |

|      |                                                                                                                                                                                                                                                                                                                                                                                                                                                                                                                                                                                                                                                                                                                                                                                                                                                                                                                                                                                                                                                                                                                                                                                                                                                             |
|------|-------------------------------------------------------------------------------------------------------------------------------------------------------------------------------------------------------------------------------------------------------------------------------------------------------------------------------------------------------------------------------------------------------------------------------------------------------------------------------------------------------------------------------------------------------------------------------------------------------------------------------------------------------------------------------------------------------------------------------------------------------------------------------------------------------------------------------------------------------------------------------------------------------------------------------------------------------------------------------------------------------------------------------------------------------------------------------------------------------------------------------------------------------------------------------------------------------------------------------------------------------------|
| 除外基準 | <p>以下のいずれかの条件に該当する患者は対象としない。ただし、2), 5), 6)に関しては評価眼に関して以下のいずれかの条件に該当する患者は対象としないこと。</p> <ol style="list-style-type: none"> <li>1) 過去に眼疾患に対する電気刺激治療を受けたことのある患者。</li> <li>2) 3ヶ月以内に内眼部手術を受けている患者。</li> <li>3) スクリーニング前 31 日以内にイソプロピルウノプロストン・カルシウム拮抗薬・暗順応改善薬の用量・用法を変更した患者。</li> <li>4) 治験期間中に使用する予定の薬剤（散瞳薬、点眼麻酔薬等）に対し、薬剤アレルギーの既往のある患者。</li> <li>5) 評価眼の視機能に重大な影響を及ぼす合併症を有する患者：硝子体黄斑牽引症候群、黄斑浮腫、黄斑前膜、後部ぶどう腫を伴う強度近視などの黄斑病変、糖尿病網膜症、外眼部の炎症、感染症、重度のドライアイ、網膜中心動脈閉塞症、後部虚血性視神経症、視神経疾患の既往、中等度以上の核白内障、視力に重大な影響を及ぼす前囊下及び後囊下白内障、後発白内障。</li> <li>6) 直近3年間の視力、OCT 所見、視野検査での視野感度のいずれも全く悪化が見られない患者。ただし、組み入れ時の参考資料として他院のデータを使用可とする。</li> <li>7) ペースメーカーもしくは除細動器が植え込まれている患者。</li> <li>8) 悪性腫瘍の既往又は合併のある患者。ただし、既往はあるが5年以上再発していない患者は登録可とする。</li> <li>9) 認知症、精神疾患と診断され治療中の患者。</li> <li>10) 血糖コントロールが著しく不良な糖尿病（HbA1c(NGSP) &gt; 10.0%）を合併している患者。</li> <li>11) 内服治療をしてもコントロール困難な高血圧症（収縮期<math>\geq</math>180 mmHg、かつ／又は、拡張期<math>\geq</math>110 mmHg）の患者。</li> <li>12) スクリーニング時の臨床検査で、下記のいずれかに該当する肝・腎機能障害が認められる患者。 <ul style="list-style-type: none"> <li>・ AST、ALT：（施設）基準値上限の3倍超</li> <li>・ 血清クレアチニン：（施設）基準値上限の1.5倍超</li> </ul> </li> <li>13) 妊娠、授乳中（授乳を中止する場合も含む）又は本治験中に妊娠を希望している患者。</li> <li>14) 現在、他の治験に参加している患者。</li> <li>15) その他、治験責任医師又は治験分担医師が本治験の参加の対象として不相当と判断した患者。</li> </ol> |
| 評価項目 | <p>&lt;主要評価項目&gt;：評価眼</p> <p>24 週時における logMAR 視力（矯正小数視力から換算）の 0 週からの変化量における電気刺激群のシャム群に対する優越性</p> <p>&lt;副次評価項目&gt;：評価眼</p> <p>24 週の下記測定項目における電気刺激群とシャム群の比較</p> <ol style="list-style-type: none"> <li>1) logMAR 視力</li> <li>2) ETDRS チャートを用いた ETDRS 視力</li> </ol>                                                                                                                                                                                                                                                                                                                                                                                                                                                                                                                                                                                                                                                                                                                                                                                                                                                                                                                                                                                           |

|      |                                                                                                                                                                                                                                                                                                                                                                                                                                                                                                                                                                                                                                                                                                                                                                                                                    |
|------|--------------------------------------------------------------------------------------------------------------------------------------------------------------------------------------------------------------------------------------------------------------------------------------------------------------------------------------------------------------------------------------------------------------------------------------------------------------------------------------------------------------------------------------------------------------------------------------------------------------------------------------------------------------------------------------------------------------------------------------------------------------------------------------------------------------------|
|      | <p>3) 静的視野検査 (HFA) : 10-2 プログラム MD 値の網膜感度</p> <p>4) 静的視野検査 (HFA) : エスターマンテスト (100 点) スコア</p> <p>5) 光干渉断層計 (OCT) : 黄斑部エリプソイドゾーン長</p> <p>6) 光干渉断層計 (OCT) : 中心窩網膜厚</p> <p>7) logMAR 視力下面積</p> <p>8) NEI VFQ-25 コンポ 9</p> <p>&lt;探索的評価項目&gt; : 評価眼</p> <p>36 週及び 48 週の下記測定項目における電気刺激群とシヤム群の比較</p> <p>➤ 36 週時点</p> <p>1) logMAR 視力</p> <p>2) ETDRS チャートを用いた ETDRS 視力</p> <p>3) 光干渉断層計 (OCT) : 黄斑部エリプソイドゾーン長</p> <p>4) 光干渉断層計 (OCT) : 中心窩網膜厚</p> <p>➤ 48 週時点</p> <p>1) logMAR 視力</p> <p>2) ETDRS チャートを用いた ETDRS 視力</p> <p>3) 静的視野検査 (HFA) : 10-2 プログラム MD 値の網膜感度</p> <p>4) 静的視野検査 (HFA) : エスターマンテスト (100 点) スコア</p> <p>5) 光干渉断層計 (OCT) : 黄斑部エリプソイドゾーン長</p> <p>6) 光干渉断層計 (OCT) : 中心窩網膜厚</p> <p>&lt;安全性評価項目&gt;</p> <p>1) 有害事象の発現状況 (種類、頻度及び重症度等)</p> <p>2) 自覚症状他覚所見</p> <p>3) 光干渉断層計 (OCT) による安全性評価 (電気刺激の網膜への安全性も含む)</p> |
| 治験方法 | <p>1) 本治験は、前観察期間、評価期間及び後観察期間から成る。<br/>(詳細は、「7.1 実施スケジュールと手順」を参照する。)</p> <p>2) 登録・割付完了後、治療を開始する。</p> <p>3) 評価期間は 24 週間とし、皮膚電極を用いた経皮膚電気刺激治療を 2 週おきに 12 回施行する。本治療時の刺激条件は以下のとおりとする。</p> <p>&lt;刺激条件&gt;</p> <p>➤ 電気刺激群</p> <ul style="list-style-type: none"> <li>・電流強度 : 1.0 mA</li> <li>・パルス幅 : 10 ms/相 双極性</li> <li>・刺激頻度 : 20 Hz</li> <li>・刺激時間 : 30 分</li> </ul> <p>➤ シヤム群</p> <ul style="list-style-type: none"> <li>・電流強度 : 0 mA</li> <li>・パルス幅 : 0 ms/相 双極性</li> <li>・刺激頻度 : 0 Hz</li> <li>・刺激時間 : 30 分</li> </ul>                                                                                                                                                                                                                                                                                             |

|          |                                                                                                                                                                                                                                                                                                                                      |
|----------|--------------------------------------------------------------------------------------------------------------------------------------------------------------------------------------------------------------------------------------------------------------------------------------------------------------------------------------|
| 中止基準     | <ol style="list-style-type: none"> <li>1) 被験者から治験参加辞退の申し出や同意撤回があった場合。</li> <li>2) 治験登録後、被験者が対象として不適格であることが判明した場合。</li> <li>3) 合併症の増悪により治験の継続が困難な場合。</li> <li>4) 有害事象により治験の継続が困難な場合。</li> <li>5) 妊娠が判明した場合。</li> <li>6) 治験全体が中止された場合。</li> <li>7) その他の重大な治験実施計画書違反が判明した場合。</li> <li>8) 治験担当医師又は治験分担医師の判断により中止の必要性が認められた場合。</li> </ol> |
| 目標被験者数   | 50 例（電気刺激群 25 例、シヤム群 25 例）                                                                                                                                                                                                                                                                                                           |
| 治験実施期間   | 治験実施期間：1 年 10 ヶ月（2021 年 6 月 1 日～2023 年 3 月 31 日）<br>症例登録期間：10 ヶ月（2021 年 6 月 1 日～2022 年 3 月 31 日）                                                                                                                                                                                                                                     |
| 治験施設数    | 3 施設                                                                                                                                                                                                                                                                                                                                 |
| 倫理及び GCP | 本治験の実施に際しては「ヘルシンキ宣言」に基づく倫理的原則、「医薬品、医療機器等の品質、有効性及び安全性の確保等に関する法律（以下、「薬機法」という。）」、「医療機器の臨床試験の実施の基準に関する省令（以下、「医療機器 GCP 省令」という。）」及びその他の関連する規制要件を遵守するものとする。                                                                                                                                                                                 |
| 治験審査委員会  | 本治験の実施に先立ち、実施医療機関の治験審査委員会は、本治験の倫理的、科学的及び医学的妥当性を審査する。本治験は、治験審査委員会の承認を得た後に実施する。治験審査委員会の審議結果が「修正の上で承認する」であった場合には、審議結果に基づいて実施計画書又は症例報告書、同意説明文書等を修正した後、本治験を実施する。また、治験審査委員会は少なくとも 1 年に 1 回以上の頻度で本治験が適切に実施されているか否かを継続的に審査する。                                                                                                                |

## 1. 緒言

### 1.1. 治験の背景

網膜色素変性（以下、「RP」という。）は、視細胞及び網膜色素上皮細胞を原発とした進行性の広範な変性がみられる遺伝性の疾患群と定義され、多くは初期に杆体の変性が現れる。進行すると視細胞の錐体細胞にも変性がおよび、視力低下をきたし、やがて失明に至る。病型により異なるが、すべて両眼性進行性で、早いものでは40代に社会的失明状態になる。先天盲の第1位であり、2015年4月から2016年3月までに新規に視覚障害認定を受けた18歳以上の認定原因疾患のうち、1位の緑内障（28.6%）に次いで2位（14.0%）となっている。遺伝子異常によって起こり、多くは単一遺伝子疾患であり、関連する遺伝子が現在80種以上報告されている。常染色体優性（15~17%）、常染色体劣性（25~30%）、X連鎖性（0.5~1.6%）のいずれかの遺伝形式をとるが、家系内に他の発症者が確認できない孤発例（49~56%）が最多となっている。2015年1月1日より国が定める指定難病の一つに認定されている。発症頻度はわが国においては約4,000~8,000人に一人と推定されており、2016年の医療受給者証保持者数厚生労働省患者調査では26,245人と報告されている。

RP患者は健常者に比べて高い頻度で白内障や後発白内障、前嚢収縮、黄斑病変（黄斑浮腫、黄斑上膜、黄斑円孔）を合併し、それぞれの疾患に対して加療が行われるが、現時点ではRPに対する有効な治療法は無く、治療法の確立は非常に重要な問題である。

電気刺激は網膜神経節細胞に対して神経保護効果があることが基礎研究により報告<sup>1,2,3</sup>されている。網膜電気刺激を行うことによって、網膜内層におけるIGF-1の活性上昇<sup>4</sup>、BDNF（脳由来神経栄養因子）の発現増加<sup>5</sup>、CNTF（毛様体神経栄養因子）発現増加<sup>6</sup>、FGF1の発現増加<sup>7</sup>、IL-1b及びTNF- $\alpha$ の抑制<sup>8</sup>、Bax遺伝子のダウンレギュレーション<sup>6</sup>、グルタミン合成酵素分泌増加<sup>9</sup>、細胞内アデノシン1リン酸レベルの増加<sup>2</sup>、細胞シグナル伝達・代謝・構造・免疫学的因子関連タンパク質のアップレギュレーション<sup>10</sup>、IL-10発現増加に伴うIL-6・COX-2発現減少<sup>11</sup>、NF- $\kappa$ Bリン酸化減少<sup>11</sup>、小膠細胞由来のTNF- $\alpha$ 産生抑制<sup>12</sup>、脈絡膜血流増加<sup>13</sup>等、様々な機序によって網膜神経保護及び機能活性化を生じると報告されている。また臨床試験においても、網膜動脈閉塞患者に対して網膜電気刺激を行うことによって視力、網膜電図振幅、視野の改善を認めたとの報告が存在する<sup>14,15</sup>。ことから、皮膚電極を用いた経皮膚電気刺激治療はRPにより視力低下が進行している患者に対して視力の改善が期待される。

海外では既に小型のポータブル型の器械が商品化され、主に欧州ではRPや加齢黄斑変性等の網膜疾患を対象として、コンタクトレンズ型角膜電極を用いた電気刺激装置である“OkuStim<sup>®</sup>”が臨床に用いられているものの、国内では商品化されていない。また、TESの“OkuStim<sup>®</sup>”は、角膜上に電極を設置して電気刺激を行うため、操作は簡便ではあるが、ドライアイの有害事象が報告<sup>15</sup>され、電気刺激による角膜障害の危険性が指摘されている。それに対して、本研究で用いる電気刺激治療は、電極を皮膚に設置することで、角膜電極と比較しより低侵襲に、より簡便に電気刺激を行うことが出来ると考える。

千葉大学医学部附属病院眼科において、RP患者10例20眼を対象に2週間隔で6回の両頬と額に設置する皮膚電極を用いた経皮膚電気刺激（以下、「TdES」という。）治療を実施した「網膜色素変性を対象とした経皮膚電気刺激の安全性および有効性を検討する探索的試験（第II相試験）（試験番号K29001）」において、重篤な有害事象の発現及び不具合等の発生はなかった。有害事象が4例（感冒4例、下痢1例、発熱1例）に発現したが、治験機器との因果関係は認められなかった。一方、有効性の検討においては、ETDRS視力が6週、10週及び12週時において0週時に比べ統計学的に有意な改善を示し、12週時

では平均で約 4 文字の改善を認めた。logMAR 視力においても 8 週時以降、0 週時に比べ統計学的に有意な改善を示した。静的視野検査での Mean Deviation 値（以下、「MD 値」という。）は改善傾向であり、12 週時において、0 週時との統計学的な有意差を認めた。

以上より、TdES によって logMAR 視力、ETDRS 視力、静的視野検査での MD 値が改善し、視力の低下を遅延させる可能性があることが示唆された。

さらに、第Ⅱ相試験被験者の長期に亘る過去データを採集し、視機能障害の進行速度及び過去データと治療効果との因果関係を調査する目的に、「網膜色素変性を対象とした経皮膚電気刺激の安全性および有効性を検討する探索的試験被験者の試験前データについての後向き研究」を実施した。その結果、logMAR 視力について最も有意かつ一定の速度で線形的に悪化していることが確認された。このことより、第Ⅱ相試験の選択基準に該当する患者層における視力の推移に関しては、電気刺激治療未介入下では有意かつ一定の速度で進行すると仮定できる。電気刺激治療介入前データを用いて線形回帰モデルで推定した値と、実際に電気刺激治療を行った場合の値との比較検討を行うことで、有効性を検証することが可能となる（この検討については別途附随研究として実施予定）。

本試験においては、24 週時における logMAR 視力（矯正小数視力から換算）の 0 週からの変化量における電気刺激群のシャム群に対する優越性を主要評価項目として、TdES による視機能の維持効果を検証し、シャム群を設定することで試験期間を通しての logMAR 視力の推移を検討する。また、皮膚電極を用いた本治療法は患者に対して侵襲性が低く、経済的にも負担の少ない治療法となる可能性があり、臨床上有用であると考えられることから、皮膚電極を用いた本治療法の開発を検討するに至った。

以上より、RP 患者における第Ⅱ相試験（試験番号 K29001）における有効性及び安全性についてシャム群に対する優越性を検証すること及びプラセボ効果を検討することを目的に、本試験を計画した。

## 1.2. 網膜色素変性に対する標準治療

RP には確立した治療法はない。残存視機能を活用する目的でロービジョンケアが行われる。その他にサプリメントや内服薬による内服治療が行われることがあるがいずれも効果に関しては明確な結論には至っておらず、内服や摂取のメリットとデメリットを患者と十分に相談したうえで使用されるのが望ましいと考えられる。このほか、白内障や黄斑浮腫等の合併症を治療することで視機能改善を見込む治療法もあるが、それらはあくまで合併症への治療にとどまる。

## 1.3. 試験機器の概要

### 1.3.1. 使用方法

電流刺激の強さ（電流量）及び時間（治療時間）をコントロールするほか、治療眼（右眼、左眼、両眼）の選択を行う。本体には、電気刺激で通電する電流の大きさ、通電時間等を表示する。皮膚電極はゲル状の粘着物質がある面を皮膚に接触し、反対の面にある突起に皮膚電極と本体を接続するケーブルを接続する。電極の装着場所は、両眼の下眼瞼耳側及び前額部の中央に装着する。

ゲル状パッドの電極は、家庭向け低周波治療器に使用されるディスクポータブルな電極に類似する。大きさは 19×38 mm 程度で、ゲル状の粘着物質がある面を皮膚に接触し、反対の面にある突起に電極と機器を接続するケーブルを接続し、皮膚を経由して電気刺激が行われる。電極の装着場所は、両眼の下眼瞼耳側及び前額部の中央に装着する（右図）。

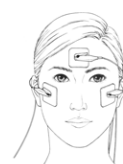

電極装着図



### 1.3.2. 非臨床成績

当該機器に使用する電極パッドが健全な皮膚に接触することから、生物学的安全性について担保が求められる。電極パッドの製造業者である積水化成工業株式会社の生物学的試験データによると、生体用ハイドロゲル（テクノゲル CR・SR<sup>®</sup>）には、生体安全性関連の有害事象はないとされており、心電図用電極、脳波用電極、生体センサー、電気治療器用電極などに使用されている。試験データの概要を以下に記す。

#### 【生物学的試験データ（SRA240/80-09S）】

1) 以下の規格に基づいて生物学的試験が実施された。

| 試験                   | 規格及び試験方法                                                                                                                                |
|----------------------|-----------------------------------------------------------------------------------------------------------------------------------------|
| 細胞毒性試験               | ISO 10993-5:2009 - 医療機器の生物学的評価 Part 5: 細胞毒性試験: in vitro 法                                                                               |
| 感作性試験                | ISO 10993-10:2010 - 医療機器の生物学的評価 Part 10: 刺激性及び遅発性過敏性の試験 (section 7.2)<br>ISO 10993-12:2012 - 医療機器の生物学的評価 Part 12: 試料調製及び対象物質            |
| 皮膚一次刺激性試験            | ISO 10993-10:2010 - 医療機器の生物学的評価 Part 10: 刺激性及び遅発性過敏性の試験 (section 6.3)                                                                   |
| 河合法<br>「24時間開放性塗布試験」 | 被験者 20 名の上腕内側部に試料を 24 時間塗布し、塗布位置を観察する。肉眼的に異常のないものはレプリカ標本を作製し全視野を顕微鏡観察し、刺激性の有無及び強度を判定する。皮膚表面の微細な形態変化（B 刺激、C 刺激）から紅斑のような炎症反応（D 刺激）まで判定する。 |

2) 結果概要（SRA240/80-09S）

| 試験方法                       | 結果                           |
|----------------------------|------------------------------|
| L929 細胞を用いた細胞毒性試験 非接触（寒天）法 | 細胞毒性なし                       |
| マウスを用いた局所リンパ節アッセイ          | 陰性                           |
| ウサギを用いた皮膚 1 次刺激性試験         | P.I.I.=0, 刺激性なし              |
| 河合法「24時間開放性塗布試験」           | 3B-0C-0D、準陽性とヒトに対する刺激性は極めて弱い |

### 1.3.3. 臨床試験成績

#### 1.3.3.1. 国内臨床成績

緒言に記載しているとおり、千葉大学医学部附属病院眼科において、RP 患者 10 例 20 眼を対象とした「網膜色素変性を対象とした経皮膚電気刺激の安全性および有効性を検討する探索的試験（第 II 相試験）」（試験番号 K29001）が実施されており、安全性及び有効性が示唆されている。

#### 1.3.3.2. 海外臨床試験成績

海外では、ドイツが Okuvision 社製 OkuStim<sup>®</sup>を、アメリカが ScyFix 社製 ScyFix700<sup>®</sup>を電気刺激治療器として販売している。角膜電極を用いた網膜電気刺激に関する文献の要旨を以下に示す。

|                            |                                                                                                                                            |
|----------------------------|--------------------------------------------------------------------------------------------------------------------------------------------|
| Schatz A 他 <sup>14</sup>   | RP24 例に TES 週 1 回 30 分 6 回、安全性及び忍容性に問題なし、有効性：視野と暗順応 b 波が有意に改善。                                                                             |
| Schatz A 他 <sup>15</sup>   | RP52 例、週 1 回 30 分 1 年間、安全性結果：安全性：一過性ドライアイ症状（52 人中 31 人）、他に臨床的に有意な有害事象なし。有効性結果：明順応 b 波が有意に改善、暗順応 b 波振幅が改善傾向。                                |
| Bittner AK 他 <sup>16</sup> | 2.4~3 年にわたり TES を 3~6 回受けた網膜色素変性患者 3 例、安全性：治療と関連ある有害事象なし、有効性：中心視機能の改善を TES 後約 4~7 週間後に繰り返し認め、その後ベースラインに回帰し、かつベースラインを超えて視機能が大幅に低下することはなかった。 |

#### 1.3.4. 予想される有害事象及び不具合等

使用する電流量からは有害事象が発生する可能性は低いと推測されるが、電極装着部位に一致した皮膚炎や角膜障害が生じる可能性がある。また電気刺激による電極装着部位付近の皮膚に刺激感を感じる事が予測される。医療機器の不具合情報に加えて、不適切な使用方法（未熟な手技）による不具合情報も含める。なお、これらの事象は、第Ⅱ相試験（試験番号 K29001）においては発現しなかった。

## 2. 治験の目的と治験実施の妥当性

### 2.1. 目的

網膜色素変性患者に対する、皮膚電極を用いた経皮膚電気刺激による視機能の維持・改善効果及び安全性をシャム群と比較し検証する。

### 2.2. 本治験実施の妥当性

RP には標準治療法がないことから、RP 患者に対する、皮膚電極を用いた経皮膚電気刺激による治療後の視機能への有効性及び安全性を確認することは臨床上必要と考えられる。

## 3. 対象患者

以下の選択基準のすべてを満たし、除外基準のいずれにも該当しない患者を治験登録適格例とする。

### 3.1. 選択基準

以下のすべての条件に該当する患者を対象とする。ただし、2)～4) に関しては評価眼に関して、以下の基準を満たすこと。

- 1) 同意取得時の年齢が 20 歳以上 80 歳未満の定型網膜色素変性患者
- 2) 信頼性（固視不良率 20 % 未満、偽陽性率 15 % 未満、偽陰性率 33 % 未満）のある静的視野検査（HFA）10-2 プログラムの計測値を示す患者
- 3) 小数視力が 0.1～0.7 の患者
- 4) 静的視野検査（HFA）10-2 プログラム MD（Mean Deviation : MD）値が -10 dB 未満の患者
- 5) 本治験の参加にあたり十分な説明を受けた後、十分な理解のうえ、本人の自由意思による文書同意が得られた患者
- 6) 2 週おきに 24 週間の通院が可能でかつ、36 週及び 48 週の後観察の通院が可能な患者
- 7) 治験期間中に適切な避妊措置を実施することが可能な患者

#### 【設定根拠】

RP は両眼進行性の疾患であり、初期は比較的視力が保たれているが、増悪すると失明する。このため、本治験機器の性能が検出可能な、視力が中等度～重度の間の中層の患者を対象とするため。

- 1) 診断基準に基づいて設定した。
- 2, 3, 4) 種々の評価項目が正確に行えるようにするため。
- 5) 「ヘルシンキ宣言」に基づく倫理的原則、薬機法、医療機器 GCP 省令及びその他の関連する規制要件を遵守して治験を実施するため。

6, 7) 本治験を完遂出来ると考えられる患者であり、かつ女性が参画しやすくするため。

### 3.2. 除外基準

以下のいずれかの条件に該当する患者は対象としない。ただし、2), 5), 6)に関しては評価眼に関して以下のいずれかの条件に該当する患者は対象としないこと。

- 1) 過去に眼疾患に対する電気刺激治療を受けたことのある患者
- 2) 3ヶ月以内に内眼部手術を受けている患者
- 3) スクリーニング前31日以内にイソプロピルウノプロストン・カルシウム拮抗薬・暗順応改善薬の用量・用法を変更した患者
- 4) 治験期間中に使用する予定の薬剤（散瞳薬、点眼麻酔薬等）に対し、薬剤アレルギーの既往のある患者
- 5) 評価眼の視機能に重大な影響を及ぼす合併症を有する患者：硝子体黄斑牽引症候群、黄斑浮腫、黄斑前膜、後部ぶどう腫を伴う強度近視などの黄斑病変、糖尿病網膜症、外眼部の炎症、感染症、重度のドライアイ、網膜中心動脈閉塞症、後部虚血性視神経症、視神経疾患の既往、中等度以上の核白内障、視力に重大な影響を及ぼす前囊下及び後囊下白内障、後発白内障
- 6) 直近3年間の視力、OCT所見、視野検査での視野感度のいずれも全く悪化が見られない患者。ただし、組み入れ時の参考資料として他院のデータを使用可とする
- 7) ペースメーカーもしくは除細動器が植え込まれている患者
- 8) 悪性腫瘍の既往又は合併のある患者。ただし、既往はあるが5年以上再発していない患者は登録可とする
- 9) 認知症、精神疾患と診断され治療中の患者
- 10) 血糖コントロールが著しく不良な糖尿病（HbA1c(NGSP) > 10.0%）を合併している患者
- 11) 内服治療をしてもコントロール困難な高血圧症（収縮期 $\geq$ 180 mmHg、かつ/又は、拡張期 $\geq$ 110 mmHg）の患者
- 12) スクリーニング時の臨床検査で、下記のいずれかに該当する肝・腎機能障害が認められる患者
  - ・ AST、ALT：（施設）基準値上限の3倍超
  - ・ 血清クレアチニン：（施設）基準値上限の1.5倍超
- 13) 妊娠、授乳中（授乳を中止する場合も含む）又は本治験中に妊娠を希望している患者
- 14) 現在、他の治験に参加している患者
- 15) その他、治験責任医師又は治験分担医師が本治験の参加の対象として不相当と判断した患者

#### 【設定根拠】

- 4, 7, 8, 9, 10, 11, 12, 13) 対象患者の安全性を考慮するため。
- 4) 被験者にアナフラキシーショック等のアレルギー反応が起こる危険性を排除するため。
- 7) 電気刺激装置から発生する微弱電流が体内に植え込まれているペースメーカーもしくは除細動器の作動を狂わせ被験者の健康に悪影響を与える可能性があるため。
- 8) 悪性腫瘍の既往又は合併のある患者は再発に対する経過観察が必要なため。なお、5年以上再発していない場合は寛解と判断されるため組み入れ可とする。

- 1  
2  
3  
4  
5  
6  
7  
8  
9  
10  
11  
12  
13  
14  
15  
16  
17  
18  
19  
20  
21  
22  
23  
24  
25  
26  
27  
28  
29  
30  
31  
32  
33  
34  
35  
36  
37  
38  
39  
40  
41  
42  
43  
44  
45  
46  
47  
48  
49  
50  
51  
52  
53  
54  
55  
56  
57  
58  
59  
60
- 9) 認知症、精神疾患と診断され治療中の患者は、対象者の来院等に伴う基礎疾患のリスクを考慮する必要があるため。
  - 10) 血糖コントロールが著しく不良な糖尿病（HbA1c(NGSP) > 10.0%）を合併している患者は、糖尿病の治療のために医師から入院を勧められる状態にあるため。
  - 11) III度高血圧であり、脳心血管病リスクが最も高い症例であり、数週間以内に速やかに高圧目標を達成する必要があり、放置すると治験中の脳心血管死を招く恐れがあるため。
  - 12) AST、ALT が CTCAE Grade 2 以上に相当し肝障害が疑われるため。血清クレアチニンは CTCAE Grade 1 以上に相当し腎障害が疑われるため。
  - 13) 本電気刺激療法の胎児・新生児への影響に関する動物実験がなく影響が不明なため。
- 1, 2, 3, 5, 6, 14, 15) 対象患者の正確な有効性を評価するため。
- 1) 電気刺激群では「フォスフェン」や「頬の弱いピリピリ感」を感じ、シヤム群では何も感じないため、バイアスがかかるため除外する。
  - 2) 3 ヶ月以内に内眼部手術を受けている場合は視機能に手術の影響が残っている恐れがあり対象患者の正確な有効性を評価するのが難しいため。
  - 3) スクリーニング前 31 日以内にイソプロピルウノプロストン・カルシウム拮抗薬・暗順応改善薬の用量・用法を変更した場合、薬剤の影響が安定していないため、信頼性のあるベースライン値が測定できない可能性があるため。
  - 5) 合併症による視機能障害と網膜色素変性による視機能障害が分離できず対象患者の正確な有効性を評価できないため。
  - 6) 直近 3 年の網膜色素変性が安定期にあり、視機能の変化が得られない可能性があるため。
  - 14) 他の治験が本治験の成績に影響を及ぼす恐れがあるため。
  - 15) 治験責任医師又は治験分担医師により、対象患者の前歴や行動により正確な有効性を評価することが困難と判断される可能性があるため。

## 4. 被験者の同意

### 4.1. 同意文書及びその他の説明文書の作成並びに改訂

治験責任医師は、被験者から治験参加の同意を得るために用いる同意文書及びその他の説明文書を可能な限り平易な表現で作成する。また、同意文書及びその他の説明文書を改訂する必要があると認めた場合は、これらを改訂する。

治験責任医師は、作成又は改訂された同意文書及びその他の説明文書を治験審査委員会に提出し、その承認を得る。

### 4.2. 同意取得の時期と方法

#### 1) 同意の取得

治験責任医師又は治験分担医師は、治験審査委員会の承認を得た同意文書及びその他の説明文書を被験者に手渡し、「4.3 被験者に対する説明事項」に示す内容について十分な説明を行う。また、必要な場合には、治験協力者も被験者に補足的な説明を行う。被験者が治験の内容を良く理解したことを確認した上で、前観察期間（スクリーニング）検査を実施するまでに文書で自由意思による同意を取得する。

#### 2) 説明時の被験者への対応

治験責任医師又は治験分担医師は、同意を得る前に被験者が質問をする機会と当該治験に参加するか否かを判断するのに十分な時間を与え、被験者の質問に対しては、被験者が満足するように回答する。

#### 3) 同意書への記入方法及び説明文書の交付

被験者の同意に際しては、説明を行った治験責任医師又は治験分担医師が記名押印又は署名し、説明した日付を記入する。被験者は同意書に記名押印又は署名し、同意した日付を記入する。なお、治験協力者が補足的な説明を行った場合は、当該治験協力者も記名押印又は署名し、説明した日付を記入する。同意を得た後、説明文書及び同意書の写しを被験者に交付する。

#### 4) 説明文書改訂時

治験責任医師又は治験分担医師は、被験者の同意に関連し得る新たな情報の入手等により同意文書及びその他の説明文書を改訂した場合、その都度、被験者に対して改訂された同意文書及びその他の説明文書を用いて改めて説明し、治験への参加継続について被験者から文書で自由意思による再同意を取得する。なお、被験者の同意に影響を与えうる新たな重要な情報が得られた場合には、直ちに当該情報を被験者に提供し、これを文書により記録するとともに、被験者が治験に継続して参加するかどうかを確認する。

#### 4.3. 被験者に対する説明事項

治験責任医師が作成する説明文書には、以下の事項を記載する。

- 1) 当該治験が研究を伴うこと
- 2) 治験の目的
- 3) 治験責任医師の氏名、職名及び連絡先
- 4) 治験の方法
- 5) 予期される臨床上の利益及び危険性又は不便
- 6) 被験者に対する他の治療方法の有無及びその治療方法に関して予測される重要な利益及び危険性
- 7) 被験者の治験に参加する予定期間
- 8) 治験への参加は被験者の自由意思によるものであり、被験者は治験への参加を随時拒否又は撤回することができること。また、拒否・撤回によって被験者が不利な扱いを受けることはないこと、治験に参加しない場合にうけるべき利益を失うことはないこと
- 9) モニター、監査担当者、治験審査委員会及び規制当局が医療に係る原資料を閲覧できること。その際、被験者の秘密は保全されること
- 10) 治験の結果が公表される場合であっても、被験者の秘密は保全されること
- 11) 治験に関連する健康被害が発生した場合に被験者が受けることのできる補償及び治療
- 12) 治験への参加継続について被験者の意思に影響を与える可能性のある情報が得られた場合には速やかに被験者に伝えられること
- 13) 治験への参加を中止させる場合の条件又は理由
- 14) 治験に関し被験者が負担をする費用
- 15) 治験に関し被験者に金銭等が支払われる場合にはその内容（支払額算定の取決め等）
- 16) 被験者が治験及び被験者の権利に関してさらに情報がほしい場合又は治験に関連する健康被害が生じた場合に照会すべき又は連絡をとるべき医療機関の相談窓口
- 17) 被験者が守るべき事項
- 18) 当該治験の適否等について調査審議を行う治験審査委員会の種類、各治験審査委員会において調査審議を行う事項その他当該治験に係る治験審査委員会に関する事項
- 19) 知的財産
- 20) 利益相反

## 5. 治験の方法

### 5.1. 治験のデザイン

本治験は、網膜色素変性患者に対する、皮膚電極を用いた経皮膚電気刺激による視機能の維持・改善効果及び安全性を検証するランダム化、二重遮蔽、シヤム対照、多施設共同試験である。

本治験のデザインは以下のとおりである。

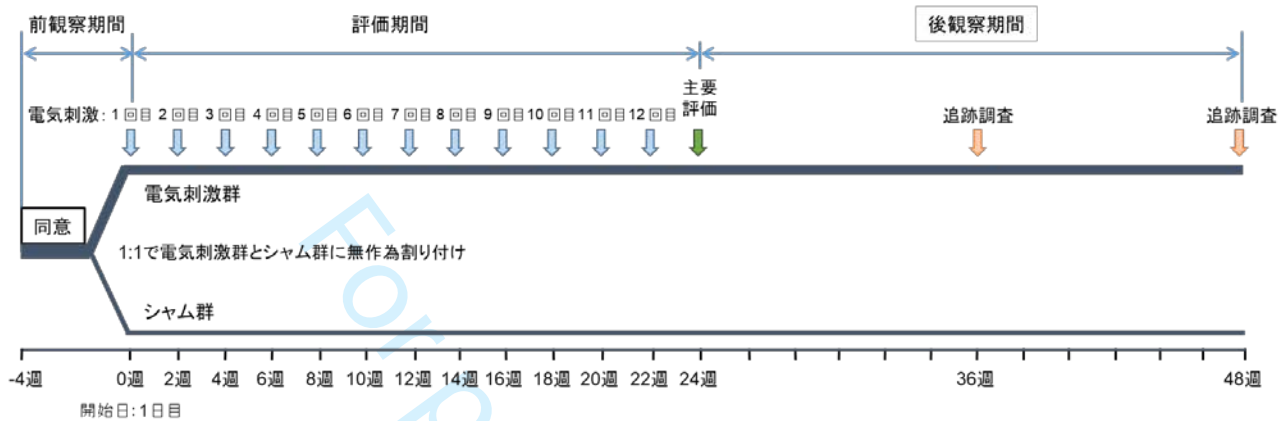

#### < 刺激条件 >

##### ➤ 電気刺激群

- ・ 電流強度：1.0 mA
- ・ パルス幅：10 ms/相 双極性
- ・ 刺激頻度：20 Hz
- ・ 刺激時間：30 分

##### ➤ シヤム群

- ・ 電流強度：0 mA
- ・ パルス幅：0 ms/相 双極性
- ・ 刺激頻度：0 Hz
- ・ 刺激時間：30 分

#### 【設定根拠】

刺激条件は「網膜色素変性を対象とした経皮膚電気刺激の安全性および有効性を検討する探索的試験（第Ⅱ相試験）（試験番号 K29001）」において安全性が示唆され、logMAR 視力、ETDRS 視力及び静的視野検査で有効性の認められた条件と同じに設定した。

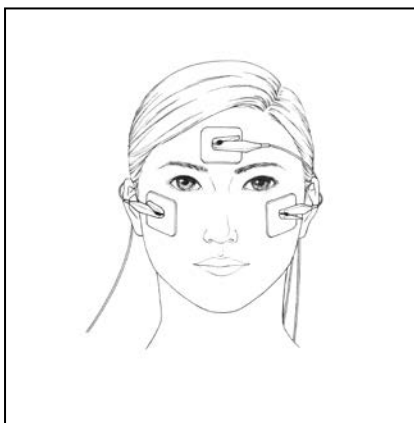

#### < 刺激方法 >

電気刺激群及びシヤム群における対象患者の前額部の中央及び両眼の下眼瞼耳側の皮膚に電極を装着し（左図参照）、電気刺激群のみ電気刺激装置から電極を通して電気刺激を行う。電流表示液晶ディスプレイは被験者から見えないように遮蔽等の措置を講じること。

シヤム群では皮膚電極を所定の位置に装着し、コードを接続した後、機器の電源を入れる。通電する電流量は0 mAとし、スタートボタンを押して30分間のタイマーを開始する。

TdES 実施日を記載する。

## 5.2. 目標被験者数と治験実施期間

50 例（電気刺激群 25 例、シヤム群 25 例）

主要評価項目は片眼（両眼とも選択・除外基準に適合する場合は右眼とする）とする。

治験実施期間：1 年 10 ヶ月（2021 年 6 月 1 日～2023 年 3 月 31 日）

症例登録期間：10 ヶ月（2021 年 6 月 1 日～2022 年 3 月 31 日）

## 5.3. 施設登録

施設登録は、千葉大学医学部附属病院 臨床試験部 データマネジメント室で行う。

### 5.3.1. 施設登録

- 1) 治験責任医師は、当該施設の治験審査委員会で承認が得られた後、治験審査委員会の承認通知書の写し及び施設登録依頼書を FAX する。
- 2) 千葉大学医学部附属病院 臨床試験部 データマネジメント室は、施設登録を行い、施設登録完了通知書を治験責任医師に送付し、大阪大学医学部附属病院 未来医療開発部 データセンターへ施設登録が完了した旨を報告する。

### 5.3.2. 施設登録先

千葉大学医学部附属病院 臨床試験部データマネジメント室

受付 FAX 番号：043-222-1207

問合せ電話番号：043-222-1206

※ 受付時間は月～金の 9:00～17:00（土日、祝日、年末年始を除く。）

※ 受付時間外に FAX を受信した場合は、翌稼働日の受付とする。

## 5.4. 症例登録

症例登録は、大阪大学医学部附属病院 未来医療開発部 データセンターにおける中央登録制とする。

### 5.4.1. 症例登録・割付

- 1) 治験責任医師又は治験分担医師は、文書による同意を取得し、スクリーニング検査の結果、被験者が選択基準を満たし、除外基準に抵触していないことを確認する。治験責任医師又は治験分担医師が「適格」と判断した被験者について、治験責任医師、治験分担医師又は治験協力者は指定された URL にアクセスし、Web サイト上で必要な情報を入力の上、症例登録及び割付を行う。
- 2) 治験責任医師又は治験分担医師は、適格性判定を画面上で確認し、適格と判定されたことを確認する。割付結果は unblind staff のみが確認できる。

一度登録された被験者の登録取り消しはされない。治験責任医師又は治験分担医師は、誤登録が判明した際には速やかに大阪大学医学部附属病院未来医療開発部データセンターに連絡する。

※ 治験責任医師又は治験分担医師は、被験者の登録もしくは割付がなされるまでプロトコル治療をしてはならない。



#### 5.4.2. 症例登録先

大阪大学医学部附属病院 未来医療開発部 データセンター

Mail : [epico-sr@dmi.med.osaka-u.ac.jp](mailto:epico-sr@dmi.med.osaka-u.ac.jp)

※ 受付時間は月～金の 9:00～17:00（土日、祝日、年末年始を除く。）

症例登録 Web サイト（DATATRAK Enterprise Cloud）

URL : <https://secure.datattrak.net>

※ 土日祝を含む 365 日、24 時間入力可能（保守点検等によるシステム停止時間を除く。）

#### 5.4.3. 割付調整因子

割付調整因子は、矯正小数視力（0.3 以下、0.4 以上）とし、割付方法は動的割付とする。

#### 5.4.4. 割付情報の管理

割付責任者及び割付担当者は、割付情報を症例登録システムで作成し、管理する。

### 5.5. 遮蔽化

本治験は電気刺激群及びシャム群に対する二重遮蔽デザインを用いて実施する。電気刺激装置の通電操作のみを実施するスタッフ（治験分担医師、治験コーディネーター：unblind staff）を置き、unblind staff のみが無作為化コードを確認できる。電気刺激装置の通電操作以外の規定検査、評価を実施する治験責任医師、治験分担医師、治験協力者（視能訓練士、治験コーディネーター）には通電の有無に関する情報、通電時の被験者の状態等を含めた情報を遮断することにより盲検性を確保し、被験者にはシャム施術及び電気刺激装置の遮蔽等治療の盲検性を最大限確保する措置を実施する。治験調整医師、治験責任医師、治験分担医師、治験コーディネーター及び治験のモニタリング等を行うその他のスタッフに対して、無作為化コードは開鍵後まで知らされない。

### 5.6. コードの開鍵

無作為化コードは、データ固定後に開封する。

### 5.7. 緊急コード開封の手続き

治験機器との因果関係が否定できない重篤な有害事象が発現し、被験者の安全性確保のため緊急コードの開封が必要であると治験責任医師が判断した場合には、治験調整医師の同意を得た上で治験責任医師は当該被験者の割付群を unblind staff より確認する。治験責任医師が緊急時の緊急コードを開封した場合、治験責任医師は実施医療機関の長及び割付責任者に連絡を行う。

### 5.8. 登録されなかった被験者の取り扱い

登録において、不適格等の何らかの理由で登録が行われなかった被験者は、治験の登録症例には含まない。治験責任医師又は治験分担医師は、当該被験者に本治験への登録が不可である旨を説明する。

### 5.9. 個々の症例の中止基準

以下の基準に該当した場合、治験責任医師又は治験分担医師は治験機器施行を中止する。検査スケジュール記載の中止時検査・評価を実施する。なお、電話等により被験者から連絡を受けた場合にも状況に応じて症例の継続・中止を判断することが出来る。その場合、中止時検査・評価は被験者の状態等を考慮の上、実施可能な時期に設定する。

- 1) 被験者から治験参加の辞退の申し出や同意撤回があった場合。
  - 2) 治験登録後、被験者が対象として不適格であることが判明した場合。
  - 3) 合併症の増悪により治験の継続が困難な場合。
  - 4) 有害事象により治験の継続が困難な場合。
  - 5) 妊娠が判明した場合。
  - 6) 治験全体が中止された場合。
  - 7) その他の重大な治験実施計画書違反が判明した場合。
  - 8) 治験担当医師又は治験分担医師の判断により中止の必要性が認められた場合。
- ・ 治験責任医師又は治験分担医師は中止日、中止理由等の必要事項を記録する。また、中止時の規定項目を可能な範囲で行う。
  - ・ 2)、7)以外は治験が中止された場合の「中止日」は、中止の理由となる事象が発現した日又は判明した日ではなく、治験責任医師又は治験分担医師が中止を判断した日とする。
  - ・ 治験責任医師又は治験分担医師は、治験機器施行開始後に中止基準に該当する被験者が判明した場合には、当該被験者にその旨を説明して治験を中止し、適切な処置を行う。
  - ・ 治験機器との因果関係が否定出来ない有害事象については、原則として症状が回復又は軽快するまで可能な限り観察継続する。

### 5.10. 併用可能薬及び併用可能療法

併用薬は指定しない。併用療法については、評価眼に対する眼科手術を行う必要が生じた際には、当該被験者の治験を中止とする。

### 5.11. 併用禁止薬及び併用禁止療法

- ・ 他の治験薬、治験製品及び治験機器

### 5.12. 併用制限薬

スクリーニング前 31 日以内から治験終了まで、以下の用量・用法を変更しない。

- ・ カルシウム拮抗薬の内服
- ・ 暗順応改善薬（アダプチノール®）の内服
- ・ イソプロピルウノプロストン製剤

### 5.13. 治験中止後の対応

治験を中止した被験者には、必要な検査・観察を実施し、必要に応じて適切な処置を講じる。

6. 治験機器

6.1. 外観及び構成

電気刺激装置、皮膚電極（エールローデ®、積水化成品工業株）及びこれらを接続する電極接続ケーブルで構成されている。

1. 本体

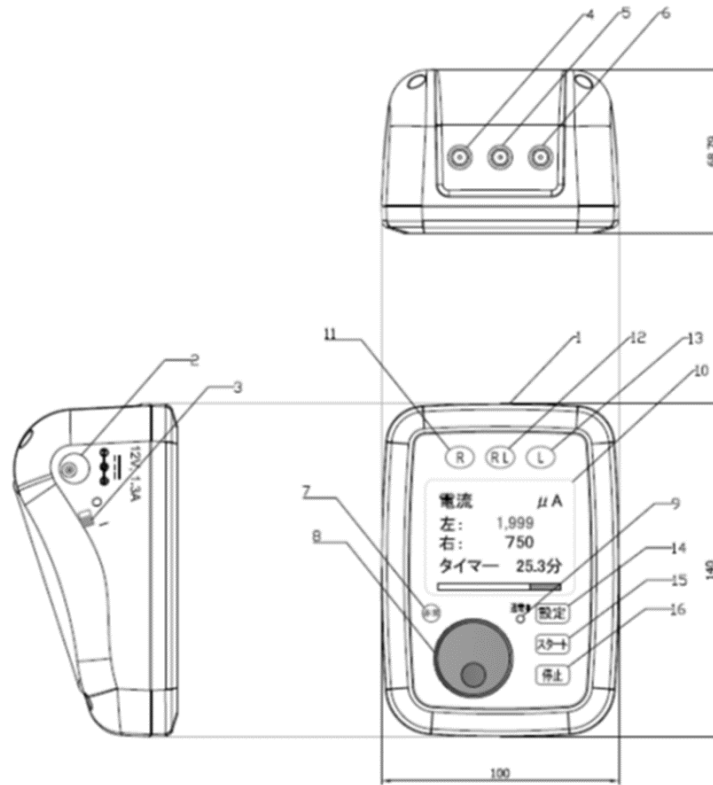

|    |              |    |              |    |                |    |               |
|----|--------------|----|--------------|----|----------------|----|---------------|
| 1  | 本体           | 2  | ACアダプタジャック   | 3  | 電源スイッチ         | 4  | 電極コネクタ (R)    |
| 5  | 電極コネクタ (COM) | 6  | 電極コネクタ (L)   | 7  | 非常停止ボタン        | 8  | ダイヤル          |
| 9  | 通電中ランプ       | 10 | 液晶ディスプレイ     | 11 | ボタンスイッチ (R)    | 12 | ボタンスイッチ (R+L) |
| 13 | ボタンスイッチ (L)  | 14 | ボタンスイッチ (設定) | 15 | ボタンスイッチ (スタート) | 16 | ボタンスイッチ (ポーズ) |

2. 電極パッド（エールローデ®）

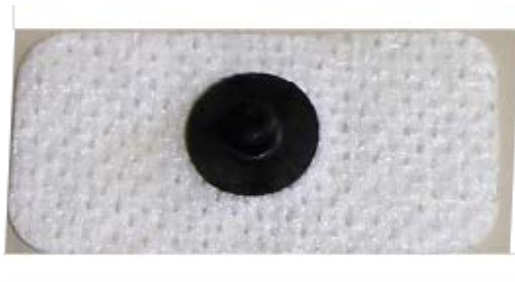

3. 電極リード線

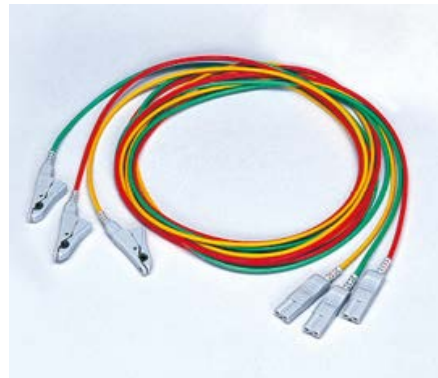

## 6.2. 安全装置

装置には、非常停止ボタンを装備している。

## 6.3. 作動原理

機器は、AC アダプタから電源が供給される。AC アダプタは商用交流電源（100 VAC, 50/60 Hz）から直流 12 V の電源（DC 12 V）が生成される。AC アダプタはスイッチング方式で交流から所定の直流が生成される。スイッチング方式は、以下の過程を経て直流が生成される。

- 1) 100 VAC をダイオードブリッジ整流器で正側に波が整流されコンデンサで平滑化される。
- 2) 高周波トランスで 1 次側が高速で on/off スwitching された電流が 2 次側に出力される。
- 3) 整流ダイオードを経て平滑化されて直流電源が出力される。

スイッチング方式は、回路構成が複雑であるが高耐圧部品により構成されている。電気の安全性試験で求められる耐圧試験にはスイッチング方式の方が性能的に優位であり、本装置で使用されている AC アダプタもスイッチング方式によるものである。

CPU 回路では、6 個の設定を行うボタンスイッチ及び非常停止ボタンが押されたかどうかの状況の有無からの入力と、ダイヤルが時計回り／反時計回りに回転された状態の入力から、CPU に書き込まれたファームウェアにより、プログラムが実行される。プログラムの実行状況やボタンスイッチ及びダイヤルの状況は 2.8 インチ、240(RGB)×320 解像度の液晶ディスプレイに表示される。CPU は 25 MHz 及び 32.768 kHz の水晶発振器によって正確なクロックで制御されている。

通電する電流は、オペアンプ及び FET トランジスタで定電流回路と 12 ビット DAC（デジタル・アナログ変換回路）によって電流量が正確に制御される。

正負両極刺激は論理回路により On/Off の情報がフォトカプラに入力され、光絶縁されて患者に電極が接続されている 3 個のソケットに出力される。

電気刺激を行うための電源は、直流 12 V を DC-DC（昇圧型 DC-DC 変換モジュール回路）に入力し、100 V の直流電圧が出力される。それをコンデンサにより平滑化して直流 100 V が生成される。

## 6.4. 品質

有限会社メイヨー稲沢研究所は、当局が定めた QMS 省令に適合している事業所であると認定されており、医療機器登録製造所の認可を受けている。また、認証機関である株式会社コスモス・コーポレーション（認証機関番号：AG）により、認証を受けたすべての医療機器に対して、QMS 定期調査により適合を認定されている。治験機器に対しては ISO14971 に従ってリスクマネジメントを実施し、当該治験機器においても品質は担保されている。

### 6.4.1. 安全性

当該治療機器は、以下の電氣的安全性に関する医療機器の JIS 規格に適合するように設計されている。

| 規格番号            | 標題                                                     |
|-----------------|--------------------------------------------------------|
| JIS T 0601-1    | 医用電気機器-第 1 部：基礎安全及び基本性能に関する一般要求事項                      |
| JIS T 0601-1-2  | 医用電気機器-第 1-2 部：基礎安全及び基本性能に関する一般的要求事項-副通則：電磁妨害-要求事項及び試験 |
| JIS T 0601-2-10 | 医用電気機器-第 2-10 部：神経及び筋刺激装置の基礎安全及び基本性能に関する個別要求事項         |

基本的な電氣的安全性試験とされている耐電圧試験、漏れ電流試験、低抵抗試験及び消費電力については、規格の要求事項に適合しており患者の安全性を担保すると考える。安全性試験においては量産機について実施予定である。本治療時には、JIS T0601-1 及び JIS T0601-1-2 に適合している付属の AC アダプタを使用し、電磁的影響に関し他の電子機器から電磁的な影響を受けない、また与えないような空間距離を担保する等安全対策を講じたうえで実施する。

使用する電流量からは有害事象が発生する可能性は低いと推測されるが、電極装着部位に一致した皮膚炎や角膜障害が生じる可能性がある。また電気刺激による電極装着部位付近の皮膚に刺激感を感じる事が予測される。

### 6.4.2. 性能

医療機器の JIS 規格 T0601-2-10 で要求される精度を含めて以下に表示する。

- ・ 電流値： 0~2,000  $\mu$ A (精度 定格出力 0~ $\pm$ 20%)
- ・ 刺激頻度： 20 Hz (精度 $\pm$ 1%)
- ・ 出力波形： 正負両相
- ・ パルス幅： 各相 10 msec (精度 $\pm$ 1%)

### 6.4.3. 製造

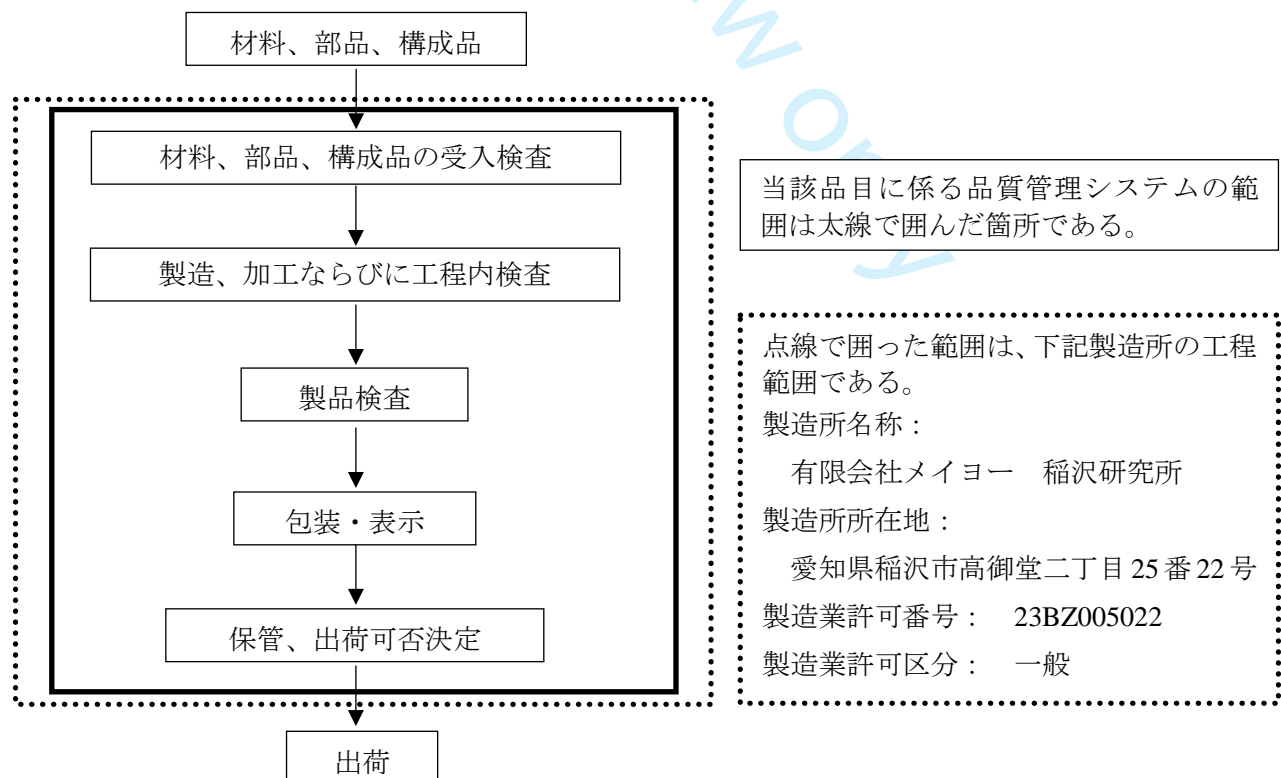

## 6.5. 包装・表示

< 治験機器ラベル（見本） >

**治験用**

**経皮膚電気刺激装置（型番号記載）**

< 注意 >

- ・ 未使用機器は破棄せずに保管して治験機器提供者に返却してください。
- ・ 治験以外には絶対使用しないでください。

< 保存条件 > 高温、多湿、直射日光を避けて保管すること。

治験調整医師：山本 修一

職名：特任教授

住所：千葉県千葉市中央区亥鼻 1-8-1

製造番号：

ラベルには治験調整医師の職名及び経皮膚電気刺激装置の製造番号を記載する。

## 6.6. 管理方法

- 1) 治験調整医師は治験開始後速やかに治験機器を実施医療機関の治験責任医師へ交付する。
- 2) 治験実施医療機関の治験機器管理者は、治験責任医師から実施医療機関の長を通じて提供された手順書に従って、治験機器を室温にて適切に管理する。
- 3) 治験責任医師は、治験機器の供給される保存条件、使用期限等取扱い方法を説明した文書を作成し、これを実施医療機関の長、治験分担医師、治験協力者、治験機器管理者等に交付する。
- 4) 治験責任医師及び治験分担医師は、治療を行う機器番号を確認し、治療中以外も含め治療機器に不具合が生じた場合は、その機器番号と不具合の状況を報告し、交換・修理が必要な場合は速やかに対応する。

7. 観察・検査・評価項目、方法及び実施時期

7.1. 実施スケジュールと手順

観察・検査・評価の実施スケジュールを以下の表に示す。治験責任医師又は治験分担医師は、スケジュールに従って観察・検査等を実施する。なお、被験者背景の調査や臨床検査など、治験協力者が実施可能な項目については、治験責任医師の管理下で治験協力者が実施しても良い。(下記スケジュール表参照)

| 項目                               | 時期    | 評価期間             |     |     |     |     |      |      |      |      |      |      |      |      |      | 後観察期間 |     | 中止時 |
|----------------------------------|-------|------------------|-----|-----|-----|-----|------|------|------|------|------|------|------|------|------|-------|-----|-----|
|                                  | 前観察期間 | 0 週 <sup>a</sup> | 2 週 | 4 週 | 6 週 | 8 週 | 10 週 | 12 週 | 14 週 | 16 週 | 18 週 | 20 週 | 22 週 | 24 週 | 36 週 | 48 週  |     |     |
| 来院治療                             | 来院①   | ②                | ③   | ④   | ⑤   | ⑥   | ⑦    | ⑧    | ⑨    | ⑩    | ⑪    | ⑫    | ⑬    | ⑭    | ⑮    | ⑯     |     |     |
| 許容範囲 (日)                         | 0~31  | 0                | ±4  | ±4  | ±4  | ±4  | ±4   | ±4   | ±4   | ±4   | ±4   | ±4   | ±4   | ±4   | ±4   | ±14   | ±14 | +7  |
| 同意取得                             | ●     |                  |     |     |     |     |      |      |      |      |      |      |      |      |      |       |     |     |
| 登録・割付 <sup>b</sup>               |       | ●                |     |     |     |     |      |      |      |      |      |      |      |      |      |       |     |     |
| 患者背景の確認                          | ●     |                  |     |     |     |     |      |      |      |      |      |      |      |      |      |       |     |     |
| 経皮膚電気刺激治療 (TdES)                 |       | ●                | ●   | ●   | ●   | ●   | ●    | ●    | ●    | ●    | ●    | ●    | ●    |      |      |       |     |     |
| 自他覚症状 <sup>c</sup>               | ●     | ●                | ●   | ●   | ●   | ●   | ●    | ●    | ●    | ●    | ●    | ●    | ●    | ●    | ●    | ●     | ●   | ●   |
| 血圧 <sup>d</sup>                  | ●     | ○                | ○   | ○   | ○   | ○   | ○    | ○    | ○    | ○    | ○    | ○    | ○    | ○    | ○    | ○     | ○   | ○   |
| 臨床検査 (採血) <sup>e</sup>           | ●     |                  |     |     |     |     |      |      |      |      |      |      |      |      |      |       |     | ○   |
| logMAR 視力 (矯正小数視力)               | ●     | ●                | ●   | ●   | ●   | ●   | ●    | ●    | ●    | ●    | ●    | ●    | ●    | ●    | ●    | ●     | ●   | ●   |
| ETDRS 視力                         | ●     | ●                |     |     |     |     |      | ●    |      |      |      |      |      | ●    | ●    | ●     | ●   | ●   |
| 静的視野検査 (10-2 プログラム) <sup>f</sup> | ●     |                  |     |     |     |     |      | ●    |      |      |      |      |      | ●    |      | ●     | ●   | ●   |
| 静的視野検査 (エスターマンテスト) <sup>f</sup>  | ●     |                  |     |     |     |     |      | ●    |      |      |      |      |      | ●    |      | ●     | ●   | ●   |
| 光干渉断層計 <sup>g</sup>              | ●     |                  |     |     |     |     |      | ●    |      |      |      |      |      | ●    | ●    | ●     | ●   | ●   |
| NEI VFQ 25 コンポ <sup>9</sup>      | ●     |                  |     |     |     |     |      | ●    |      |      |      |      |      | ●    |      | ●     | ●   | ●   |
| 細隙灯顕微鏡検査                         | ●     |                  |     |     | ●   |     |      | ●    |      |      |      |      |      | ●    | ●    | ●     | ●   | ●   |
| 眼圧・眼底検査 <sup>h</sup>             | ●     |                  |     |     | ●   |     |      | ●    |      |      |      |      |      | ●    | ●    | ●     | ●   | ●   |
| 妊娠検査 (該当者のみ)                     | ●     |                  |     |     |     |     |      |      |      |      |      |      |      |      |      |       |     | ○   |
| 有害事象の観察 <sup>i</sup>             | ←     |                  |     |     |     |     |      |      |      |      |      |      |      |      |      | →     |     |     |

- 1 a) スクリーニングと評価期 0 週の検査を同日に実施する場合、重複する検査についてはスクリーニング検査の結果を評価期 0 週の検査結果として使用可能。
- 2 b) 同意取得と登録までの期間が 31 日間を超えた場合は、再同意を文書で取得し再度スクリーニング検査を実施し登録可能とする。
- 3 c) 自覚症状（角膜炎、皮膚炎の他、前眼部・中間透光体の評価、顔面神経や三叉神経、鼻への影響も確認）は TdES 実施前と実施直後に実施する。
- 4 d) 血圧は、スクリーニング時に測定し、それ以外は必要に応じて測定する。
- 5 e) 臨床検査項目は、AST(GOT)、ALT(GPT)、ALP、総ビリルビン、BUN、血清クレアチニン、HbA1c、赤血球、白血球、ヘモグロビン、血小板とする。
- 6 f) 前観察期間の静的視野検査（HFA）10-2 プログラムは、計測値の信頼性（固視不良率 20 %未満、偽陽性率 15 %未満、偽陰性率 33 %未満）を確認する。信頼性
- 7 が確認できなかった場合は再測定するか、同意取得時 6 ヶ月以内の自施設での計測値を使用可とする。静的視野検査（HFA）は 10-2 プログラムとエスターマン
- 8 テスト（100 点）を実施する。
- 9 g) 光干渉断層計は、エリプソイドゾーン（EZ）長、中心窩下の厚み（中心窩網膜厚）を計測・数値化する。電気刺激の網膜への安全性も確認する。検査は散瞳後
- 10 実施する。
- 11 h) 眼底検査は散瞳後実施する。
- 12 i) 有害事象とは副作用等好ましくないすべての事象のことで、治療との因果関係は問わない。
- 13
- 14
- 15
- 16
- 17
- 18
- 19
- 20
- 21
- 22
- 23
- 24
- 25
- 26
- 27
- 28
- 29
- 30
- 31
- 32
- 33
- 34
- 35
- 36
- 37
- 38
- 39
- 40
- 41
- 42
- 43
- 44
- 45
- 46



### 7.1.1. スクリーニング検査

同意取得後、スクリーニング検査を開始する。治験責任医師又は治験分担医師は以下のスクリーニング検査を行い、選択基準を満たし、除外基準に抵触しない患者を被験者とする。検査項目は以下に記載のとおりとし、眼の検査に関しては両眼について実施し評価眼を決定する。

1) 自覚症状

※角膜炎、皮膚炎の他、前眼部・中間透光体の評価、顔面神経や三叉神経、鼻への影響も確認する。

2) 血圧

3) 臨床検査（採血）

※AST(GOT)、ALT(GPT)、ALP、総ビリルビン、BUN、血清クレアチニン、HbA1c、赤血球、白血球、ヘモグロビン、血小板数を測定する。

4) logMAR 視力（矯正小数視力）

5) ETDRS 視力

6) 静的視野検査（HFA）：10-2 プログラム及びエスターマンテスト（100 点）

7) 光干渉断層計（OCT）：エリプソイドゾーン（EZ）長、中心窩下の厚み（中心窩網膜厚）

※エリプソイドゾーン（EZ）長、中心窩を通るスライス長 6 mm における水平及び垂直断面の 2 方向撮影し、中心窩下の厚み（中心窩網膜厚）を計測し・数値化する。電気刺激による網膜への安全性確認も併せて実施する。

- エリプソイドゾーン（EZ）長：黄色矢印の間の長さ（▼：EZ）。



- 中心窩下の厚み（中心窩網膜厚）：黄色矢印で示した長さ。



8) NEI VFQ 25 コンポ 9

※VFQ-25: The 25-item National Eye Institute Visual Function Questionnaire（視覚に関連した健康関連 QOL を測定する 12 の尺度「全体的健康感」、「全体的見え方」、「目の痛み」、「近見視力による行動」、「遠見視力による行動」、「見え方による社会生活機能」、「見え方による心の健康」、「見え方による役割制限」、「見え方による自立」、「運転」、「色覚」及び「周辺視覚」）から、「全体的健康感」、「目の痛み」及び「運転」を除いた 9 項目の平均値を求めるコンポ 9 を用いた QOL。

9) 細隙灯顕微鏡検査

10) 眼圧・眼底検査（カラー眼底写真）

11) 妊娠検査

※スクリーニング時、女性被験者を対象に、実施医療機関で定められた基準に従い、尿中 hCG 検査を実施する。ただし、両側卵巣摘出又は子宮摘出の既往歴がある被験者、又は別の医学的理由を伴わずに月経のない状態が 12 ヶ月以上にわたる被験者は実施不要とする。

12) 有害事象の観察

- なお、6) に関しては、同意取得前の自施設でのデータを使用することができる。
- 7) 10) に関して、OCT 及び眼底検査は散瞳してから実施する。

- 1  
2  
3  
4  
5  
6  
7
- 10) 眼圧検査に関しては、COVID-19 感染拡大防止の観点から、治験責任医師又は治験分担医師の判断で非実施とすることが出来る。この場合は、治験実施計画書からの逸脱とはしない。

### 7.1.2. 被験者の情報

8  
9  
10  
11  
12  
13  
14  
15  
16  
17  
18  
19  
20  
21  
22  
23  
24  
25  
26  
27

同意取得時又はスクリーニング検査時に、以下の被験者情報を記録する。

- 1) 同意取得日
- 2) 被験者識別コード
- 3) 性別
- 4) 同意取得時年齢・生年月日
- 5) 身長・体重
- 6) 既往・合併症
- 7) 前治療歴
- 8) 併用薬・併用療法
- 9) 治験期間中に使用する予定の薬剤に対するアレルギーの有無
- 10) 評価眼（両眼ともに選択基準等を満たす場合、評価眼は右目とする）

### 7.1.3. 観察・検査・評価項目

28  
29  
30  
31  
32  
33  
34  
35  
36  
37  
38  
39  
40  
41  
42  
43  
44  
45  
46  
47  
48  
49  
50  
51  
52  
53  
54  
55  
56  
57  
58  
59  
60

各来院時における検査項目を以下に記す。なお、治験責任医師又は治験担当医師の判断で、安全性上等の必要に応じて検査を追加することは可能とする。

眼圧検査に関しては、COVID-19 感染拡大防止の観点から、治験責任医師又は治験分担医師の判断で非実施とすることが出来る。この場合は、治験実施計画書からの逸脱とはしない。

#### 【評価期 0 週】

- 治験機器施行前に以下を実施する。
  - ※スクリーニングと評価期 0 週の検査を同日に実施する場合、重複する検査についてはスクリーニング検査の結果を評価期 0 週の検査結果として使用可能。
  - 1) 自覚症状：両眼に実施
    - ※角膜炎、皮膚炎の他、前眼部・中間透光体の評価、顔面神経や三叉神経、鼻への影響も確認する。
  - 2) logMAR 視力（矯正小数視力）：評価眼に実施
  - 3) ETDRS 視力：評価眼に実施
  - 4) 有害事象の観察
- 治験機器施行後、当日中に以下を実施する。
  - 1) 自覚症状：両眼に実施
    - ※角膜炎、皮膚炎の他、前眼部・中間透光体の評価、顔面神経や三叉神経、鼻への影響も確認する。
  - 2) 有害事象の観察

#### 【評価期 2, 4, 8, 10, 14, 16, 18, 20, 22 週】

- 治験機器施行前に以下を実施する。
  - 1) 自覚症状：両眼に実施
    - ※角膜炎、皮膚炎の他、前眼部・中間透光体の評価、顔面神経や三叉神経、鼻への影響も確認する。

- 2) logMAR 視力（矯正小数視力）：評価眼に実施
- 3) 有害事象の観察

● 治験機器施行後、当日中に以下を実施する。

- 1) 自他覚症状：両眼に実施  
※角膜炎、皮膚炎の他、前眼部・中間透光体の評価、顔面神経や三叉神経、鼻への影響も確認する。
- 2) 有害事象の観察

【評価期 6 週】

● 治験機器施行前に以下を実施する。

- 1) 自他覚症状  
※角膜炎、皮膚炎の他、前眼部・中間透光体の評価、顔面神経や三叉神経、鼻への影響も確認する。
- 2) logMAR 視力（矯正小数視力）：評価眼に実施
- 3) 細隙灯顕微鏡検査：両眼に実施
- 4) 眼圧・眼底検査（カラー眼底写真）：両眼に実施
- 5) 有害事象の観察

なお、4) に関して、眼底検査は散瞳してから実施する。

● 治験機器施行後、当日中に以下を実施する。

- 1) 自他覚症状：両眼に実施  
※角膜炎、皮膚炎の他、前眼部・中間透光体の評価、顔面神経や三叉神経、鼻への影響も確認する。
- 2) 有害事象の観察

【評価期 12 週】

● 治験機器施行前に以下を実施する。

- 1) 自他覚症状：両眼に実施  
※角膜炎、皮膚炎の他、前眼部・中間透光体の評価、顔面神経や三叉神経、鼻への影響も確認する。
- 2) logMAR 視力（矯正小数視力）：評価眼に実施
- 3) ETDRS 視力：評価眼に実施
- 4) 静的視野検査（HFA）：10-2 プログラム及びエスターマンテスト（100 点）：評価眼に実施
- 5) 光干渉断層計（OCT）：エリプソイドゾーン（EZ）長、中心窩下の厚み（中心窩網膜厚）：評価眼に実施  
※エリプソイドゾーン（EZ）長、中心窩を通るスライス長 6 mm における水平及び垂直断面の 2 方向撮影し、中心窩下の厚み（中心窩網膜厚）を計測し・数値化する。電気刺激による網膜への安全性確認も併せて実施する。
- 6) NEI VFQ 25 コンポ 9
- 7) 細隙灯顕微鏡検査：両眼に実施
- 8) 眼圧・眼底検査（カラー眼底写真）：両眼に実施
- 9) 有害事象の観察

なお、5) 8) に関して、OCT 及び眼底検査は散瞳してから実施する。

- 治験機器施行後、当日中に以下を実施する。

- 1) 自他覚症状：両眼に実施  
※角膜炎、皮膚炎の他、前眼部・中間透光体の評価、顔面神経や三叉神経、鼻への影響も確認する。
- 2) 有害事象の観察

#### 【評価期 24 週、後観察期 48 週】

- 来院時に以下を実施する。：両眼に実施

- 1) 自他覚症状  
※角膜炎、皮膚炎の他、前眼部・中間透光体の評価、顔面神経や三叉神経、鼻への影響も確認する。
- 2) logMAR 視力（矯正小数視力）：評価眼に実施
- 3) ETDRS 視力：評価眼に実施
- 4) 静的視野検査（HFA）：10-2 プログラム及びエスターマンテスト（100 点）：評価眼に実施
- 5) 光干渉断層計（OCT）：エリプソイドゾーン（EZ）長、中心窩下の厚み（中心窩網膜厚）：評価眼に実施  
※エリプソイドゾーン（EZ）長、中心窩を通るスライス長 6 mm における水平及び垂直断面の 2 方向撮影し、中心窩下の厚み（中心窩網膜厚）を計測し・数値化する。電気刺激による網膜への安全性確認も併せて実施する。
- 6) NEI VFQ 25 コンボ 9
- 7) 細隙灯顕微鏡検査：両眼に実施
- 8) 眼圧・眼底検査（カラー眼底写真）：両眼に実施
- 9) 有害事象の観察

なお、5) 8) に関して、OCT 及び眼底検査は散瞳してから実施する。

#### 【後観察期 36 週】

- 来院時に以下を実施する。

- 1) 自他覚症状：両眼に実施  
※角膜炎、皮膚炎の他、前眼部・中間透光体の評価、顔面神経や三叉神経、鼻への影響も確認する。
- 2) logMAR 視力（矯正小数視力）：評価眼に実施
- 3) ETDRS 視力：評価眼に実施
- 4) 光干渉断層計（OCT）：エリプソイドゾーン（EZ）長、中心窩下の厚み（中心窩網膜厚）：評価眼に実施  
※エリプソイドゾーン（EZ）長、中心窩を通るスライス長 6 mm における水平及び垂直断面の 2 方向撮影し、中心窩下の厚み（中心窩網膜厚）を計測し・数値化する。電気刺激による網膜への安全性確認も併せて実施する。
- 5) 細隙灯顕微鏡検査：両眼に実施
- 6) 眼圧・眼底検査（カラー眼底写真）：両眼に実施
- 7) 有害事象の観察

なお、4) 6) に関して、OCT 及び眼底検査は散瞳してから実施する。

**【中止時】**

治験責任医師又は治験分担医師により治験機器施行の中止を判断された日から 7 日以内に可能な範囲で以下を実施する。

- 1) 自覚症状：両眼に実施  
※角膜炎、皮膚炎の他、前眼部・中間透光体の評価、顔面神経や三叉神経、鼻への影響も確認する。
- 2) logMAR 視力：評価眼に実施
- 3) ETDRS 視力：評価眼に実施
- 4) 静的視野検査 (HFA)：10-2 プログラム及びエスターマンテスト (100 点)：評価眼に実施
- 5) 光干渉断層計 (OCT)：エリプソイドゾーン (EZ) 長、中心窩下の厚み (中心窩網膜厚)：評価眼に実施  
※エリプソイドゾーン (EZ) 長、中心窩を通るスライス長 6 mm における水平及び垂直断面の 2 方向撮影し、中心窩下の厚み (中心窩網膜厚) を計測し・数値化する。電気刺激による網膜への安全性確認も併せて実施する。
- 6) NEI VFQ 25 コンポ 9
- 7) 細隙灯顕微鏡検査：両眼に実施
- 8) 眼圧・眼底検査 (カラー眼底写真)：両眼に実施
- 9) 有害事象の観察
- 10) 妊娠検査  
※必要に応じてスクリーニング時に実施した被験者を対象として実施する。

なお、5) 8) に関して、OCT 及び眼底検査は散瞳してから実施する。

## 8. 有害事象発生時の取り扱い

### 8.1. 有害事象、不具合及び機器関連有害事象の定義

有害事象とは、治験機器との因果関係の有無に関わらず、当該治験機器の使用した又は使用された被験者その他の者に生じたすべての疾病若しくは障害又はこれらの兆候をいう。ただし、被験者以外の者に生じたものについては、治験機器の使用による影響と疑われるものに限る。

既存の病態（治験期間よりも以前に存在した既往歴又は合併症）については、治験期間内に増悪又は発症頻度の上昇がない限り、有害事象として扱わない。ただし、治験機器施行後に合併症が悪化した場合、有害事象として取扱い、悪化が確認された日を有害事象の発現日とする。

不具合とは、破損、作動不良等広く品質、安全性、性能等に関する治験機器の具合の良くないことをいい、設計、交付、保管、使用のいずれの段階によるものであるかを問わない。治験機器の不具合に関する情報を以下、不具合情報という。

機器関連有害事象とは、有害事象のうち本治験機器又は手技との因果関係が否定できないものをいう。

### 8.2. 有害事象又は不具合発生時の被験者への対応

治験責任医師又は治験分担医師は、有害事象又は不具合を認めたときは、直ちに適切な処置を行うとともに、治験機器の使用を中止した場合や、有害事象に対する治療が必要となった場合には、被験者にその旨を伝える。なお、治験終了・中止時に治験機器との因果関係が否定できない有害事象が未回復の場合は、原則として回復又は軽快するまで可能な限り観察を継続する。ただし、治験責任医師又は治験分担医師が本治験の影響は消失しており、被験者の安全性は十分確保され、それ以上の追跡調査は必要ないと判断した場合はこの限りではない。

### 8.3. 報告の対象となる有害事象及び不具合

同意取得時から治験終了時まで発生したすべての有害事象は、治験機器との因果関係の有無に関わらず報告し、有害事象が消失するか治験期間終了時（中止時）まで観察する。また、治験機器との因果関係が否定できないと判断された有害事象及び発生した不具合情報については治験期間終了時まですべて報告する。

### 8.4. 有害事象及び不具合発生時の報告手順

上記期間に発生したすべての有害事象及び不具合について、治験責任医師又は治験分担医師は、カルテならびに症例報告書に齟齬なく記載する。

### 8.5. 有害事象及び不具合の評価に必要な記載内容

#### 8.5.1. 有害事象

#### 1) 有害事象の名称

有害事象名は、原則として診断名・疾患名（病名）で記録する。診断名・疾患名が特定できない場合や治験責任医師又は治験分担医師より診断名・疾患名としないことが妥当と判断された場合には、臨床症状又は徴候を有害事象名とする。

#### 2) 発現日

- 3) 消失日：回復、回復又は消失したが後遺症あり、死亡の場合に日付
- 4) 転帰：回復、軽快、回復又は消失したが後遺症あり、未回復、死亡、不明
- 5) 処置（治験機器の施行）：変更なし、中止、休止、該当せず
- 6) その他処置：なし、薬物治療、その他
- 7) 重篤度：非重篤、重篤
- 8) 重症度：軽度、中等度、重度
  - ・ 軽度：日常生活に支障を来たさないと考えられる程度の有害事象。例）経過観察可能な程度
  - ・ 中等度：日常生活に支障を来すと考えられる程度の有害事象。例）何らかの介入や治療が必要な程度
  - ・ 重度：日常生活を困難にすると考えられる程度の有害事象。例）高度かつ集中的な治療や全身介助が必要とされる程度
- 9) 治験機器との因果関係：関連が否定できる（否定理由コメント要）、関連が否定できない

### 8.5.2. 不具合

- 1) 不具合を起こした機器番号
- 2) 不具合名
- 3) 不具合の確認日
- 4) 発生日
- 5) 不具合が発生したと考えられる原因及び不具合状況
- 6) 不具合に対する処置
- 7) 当該不具合による有害事象の有無

### 8.5.3. 有害事象の回復性と治験機器との因果関係

#### 8.5.3.1. 治験機器との因果関係

有害事象の回復とは、有害事象がない状態、又は治験機器施行前の状態への回復とする。有害事象における治験機器との因果関係の判定に際しては、被験者の全身状態、合併症、併用薬・併用療法、時間的關係を勘案して判断する。

- 1) 関連が否定できる：他の要因が合理的な可能性を有し説明できる場合、あるいは被験者が治験機器施行開始前
- 2) 関連が否定できない：他の要因との関連がはっきりできない場合

#### 8.5.3.2. 治験機器に関する処置

- 1) 変更なし：有害事象が発現したが、治験機器治療の施行条件に変更がない場合
- 2) 中止：有害事象の発現により、治験機器施行を中止した場合
- 3) 休止：有害事象の発現により、治験機器施行を一時的に休止した場合
- 4) 該当せず：有害事象が治験機器施行開始前又は治験期間終了後に発現した場合

### 8.5.3.3. 転帰

- 1) 回復：有害事象が発現以前の状態に回復、消失した場合
- 2) 回復又は消失したが後遺症あり：有害事象が回復したが、有害事象の影響が後遺症として残っている場合
- 3) 死亡：発現した有害事象が死亡の直接の原因となった場合
- 4) 軽快：有害事象は継続しているが、症状は改善傾向である場合
- 5) 未回復：有害事象は継続している（症状は改善傾向でない）場合
- 6) 不明：被験者の追跡が不能となった場合

## 8.6. 重篤な有害事象発生時の取り扱い

### 8.6.1. 重篤な有害事象の定義

重篤な有害事象とは、次のいずれかに該当するものとする。

- 1) 死亡に至るもの（死亡）
- 2) 生命を脅かすもの（死亡につながるおそれ）
- 3) 入院又は入院期間の延長が必要になるもの
- 4) 永続的又は顕著な障害・機能不全に陥るもの
- 5) 先天性異常をきたすもの
- 6) その他、上記に準じて重篤なもの

なお、以下に記載する理由での「入院」については重篤な有害事象とはみなさない。

- ・ 再検査、追跡調査のための入院又は入院期間の延長、及び治験開始前より予定していた治療又は検査を治験中に実施することのみを目的とした入院（予定手術や検査等）は含まれない。（ただし、その入院中新たに発生したものは有害事象として取り扱う。）
- ・ 本治験の対象疾患に関係のない既存の病態に対する待機的治療のための入院。
- ・ 全身状態の悪化を伴わない、社会的事由及び介護者の一時休息のための入院。

### 8.6.2. 報告の対象となる重篤な有害事象

報告対象は、同意取得時から治験終了（中止）時まで発生した、すべての重篤な有害事象又はその発生のおそれがある事象、及び治験終了（中止）後に治験機器との関連性が疑われる重篤な有害事象とする。



### 8.6.3. 重篤な有害事象等の報告手順

有害事象が発生し、治験責任医師等が重篤と判断した場合、次の手順に従い当該有害事象情報を取り扱う。

#### 1) 治験責任医師から実施医療機関の長への報告

治験責任医師は、同意取得時から、治験期間中に治験機器の不具合等による死亡その他の重篤な有害事象の発生を認めた場合又はその発生のおそれがあると認めた場合は、直ちに各実施医療機関の長に文書にてその内容を報告する。報告に際しては、重篤な有害事象が予測出来ないか否かを特定する。

また、治験責任医師は可能な限り速やかに「重篤な有害事象及び不具合に関する報告書」（統一書式 14）及び「医詳細記載用書式」に当該事象の詳細な内容を記載し、実施医療機関の長に報告する。

#### 2) 治験責任医師から治験調整医師、治験機器提供者への報告

治験責任医師は、同意取得時から、治験期間中に治験機器の不具合等による死亡その他の重篤な有害事象の発生を認めた場合又はその発生のおそれがあると認めた場合は、直ちに治験調整医師及び治験機器提供者にその内容を報告する。

また、治験責任医師は可能な限り速やかに「重篤な有害事象及び不具合に関する報告書」（統一書式 14\_及び医詳細記載用書式）に当該事象の詳細な内容を記載し、治験調整医師に報告する。

#### 3) 治験責任医師と治験調整医師との協議

治験責任医師は、必要に応じ治験調整医師と協議し、治験責任医師としての意見（厚生労働大臣への報告の必要性を含む。）を治験調整委員会に報告する。

また、データモニタリング委員会に治験責任医師の判断について諮問を行った場合には、データモニタリング委員会の意見に従う。

#### 4) 厚生労働大臣への報告

薬機法に規定される報告対象となる有害事象又は不具合と判断した場合は、治験調整医師は「医療機器不具合・感染症症例報告書」（別紙様式第 8）を作成し、データモニタリング委員会及び PMDA へ報告する。

詳細な手順は「安全性情報の取り扱いに関する手順書（仮称）」に従う。

#### 5) 実施医療機関の長への報告

治験責任医師は、厚生労働大臣への報告がなされた場合には、治験調整医師より入手した「医療機器不具合・感染症症例報告書」（別紙様式第 8）及び必要に応じ「医詳細記載用書式」の内容を、可能な限り速やかに実施医療機関の長に報告する。

#### 6) 追加情報の入手時の対応

当該有害事象が発生した実施医療機関の治験責任医師は、当該事象に関する追加情報が得られた場合には、可能な限り速やかに各実施医療機関の長に追加報告を行うとともに、治験調整医師及び治験機器提供者に報告する。当該追加情報の取扱いは、上記 1)~5) の手順に準ずることとし必要に応じ PMDA への報告等を行う。

## 9. 評価項目

### 9.1. 主要評価項目

24 週時における logMAR 視力（矯正小数視力から換算）の 0 週からの変化量における電気刺激群のシャム群に対する優越性

#### 【主要評価項目の設定根拠】

logMAR 視力：国内で実施される視機能の維持・改善効果を検討する臨床研究に広く用いられているため。

### 9.2. 副次評価項目

24 週の下記測定項目における電気刺激群とシャム群の比較

- 1) logMAR 視力
- 2) ETDRS チャートを用いた ETDRS 視力
- 3) 静的視野検査（HFA）：10-2 プログラム MD 値の網膜感度
- 4) 静的視野検査（HFA）：エスターマンテスト（100 点）スコア
- 5) 光干渉断層計（OCT）：黄斑部エリプソイドゾーン長
- 6) 光干渉断層計（OCT）：中心窩網膜厚
- 7) logMAR 視力下面積
- 8) NEI VFQ 25 コンポ 9

#### 【副次評価項目への設定根拠】

- 1) logMAR 視力：国内で実施される視力の維持・改善効果を検討する臨床研究に広く用いられているため。
- 2) ETDRS 視力：欧米及び本邦で広く使用されている視力評価であり視機能判定として臨床現場で定着しているため。
- 3) 静的視野検査（HFA）10-2 プログラム MD 値：中心約 10 度部分以内の視野を詳しく測定するのに向いているため。
- 4) 静的視野検査（HFA）エスターマンテスト（100 点）スコア：自動視野計であり検者間での差異が少なく、再現性・定量性に優れているため。
- 5), 6) OCT における黄斑部エリプソイドゾーン長及び中心窩網膜厚は OCT を用いた自動測定が可能であり、RP の進行度の客観的指標とされているため。
- 7) logMAR 視力下の面積を算出することで、経皮膚電気刺激による logMAR 視力への累積効果を評価できると考え設定する。
- 8) 視覚に関連した健康関連 QOL を測定する尺度として眼科疾患が日常生活に与える影響を評価したり、治療やケアの結果を評価したりするのに広く使用されており、日本語版は、信頼性・妥当性などの計量心理学的特性が検証済みのため。

### 9.3. 探索的評価項目

36 週及び 48 週の下記測定項目における電気刺激群とシャム群の比較

- 1  
2  
3  
4  
5  
6  
7  
8  
9  
10  
11  
12  
13  
14  
15  
16  
17  
18  
19  
20  
21
- 36 週時点
    - 1) logMAR 視力
    - 2) ETDRS チャートを用いた ETDRS 視力
    - 3) 光干渉断層計 (OCT) : 黄斑部エリプソイドゾーン長
    - 4) 光干渉断層計 (OCT) : 中心窩網膜厚
  - 48 週時点
    - 1) logMAR 視力
    - 2) ETDRS チャートを用いた ETDRS 視力
    - 3) 静的視野検査 (HFA) : 10-2 プログラム MD 値の網膜感度
    - 4) 静的視野検査 (HFA) : エスターマンテスト (100 点) スコア
    - 5) 光干渉断層計 (OCT) : 黄斑部エリプソイドゾーン長
    - 6) 光干渉断層計 (OCT) : 中心窩網膜厚

22  
23

**【探索的評価項目への設定根拠】**

- 24  
25  
26  
27  
28
- 1) ETDRS チャートにおける 1 行以上の改善した被験者の割合を検討するため。
  - 2) 本治験機器において視力の低下が抑制されていることを検討するため。
  - 3) 電気刺激治療終了後の効果の維持の有無を探索的に評価するため。

29  
30  
31

**9.4. 安全性評価項目**

- 32
- ・ 同意取得時から評価期 24 週における有害事象の発現状況 (種類、頻度及び重症度等)

33  
34  
35  
36  
37  
38  
39  
40

被験者に観察された有害事象をすべて記録し有害事象の発現状況 (種類、頻度及び重症度等) を解析する。有害事象名は MedDRA/J の LLT に読み替え、PT、SOC で集計をする。第 II 相試験 (試験番号 K29001) では有害事象の発現が見られなかったが、角膜炎、皮膚炎の他、前眼部・中間透光体の評価も行う。また、顔面神経や三叉神経、鼻への影響も受診の際に確認を行う。加えて、光干渉断層計 (OCT) による安全性評価 (電気刺激の網膜への安全性も含む) を行う。

- 41  
42  
43
- ・ 24 週以降 48 週目までの遅発性有害事象の発現状況 (種類、頻度及び重症度等)

44  
45  
46  
47

被験者に観察された治験機器施行完了後、すべての有害事象を記録し遅発性有害事象の発現状況 (種類、頻度及び重症度等) を解析する。解析は最初の 24 週間と同様に行う。

48  
49

**【安全性評価項目の設定根拠】**

50  
51

本治験の安全性について評価するため設定した。

52  
53  
54

**10. 統計学的事項**

55  
56  
57  
58  
59  
60

本治験の統計解析計画の概要を以下にまとめた。なお、統計解析計画の詳細は、統計解析計画書に記載する。統計解析計画書において本治験実施計画書の概要を修正することがあるが、主要評価項目の定義や解析方法が変更される場合には、本治験実施計画書を改訂する。

## 10.1. 解析対象集団

### 10.1.1. 安全性解析対象集団

本治験に登録され、少なくとも1回は治験機器が施行された症例を安全性解析対象集団とする。ただし、医療機器 GCP 省令不遵守例は安全性解析対象集団から除外する。

### 10.1.2. 最大の解析対象集団

本治験に登録され、1 回以上治験機器が施行され、有効性データがあるすべての被験者を最大の解析対象集団（以下、「FAS」という。）とする。ただし、ベースラインのデータが取得されなかった被験者及び、重大な治験実施計画書違反（同意未取得、等）の被験者については除外する。

### 10.1.3. 治験実施計画書に適合した対象集団

FAS から、治験方法や併用療法等、治験実施計画書の規定に対して、以下の重大な違反があった症例を除いた被験者集団（以下、「PPS」という。）とする。

選択基準違反、除外基準違反、併用禁止薬違反、併用禁止療法違反、80 %未満の治療率

## 10.2. 目標症例数と設定根拠

50 例（電気刺激群 25 例、シャム群 25 例）、50 眼

※両目とも選択基準を満たし、除外基準に該当しない場合は右眼とする。

### 【設定根拠】

第Ⅱ相試験（試験番号 K29001）の結果から、8 週、10 週、12 週時点で、logMAR 視力の改善が認められた。この結果より、本治験の主要評価項目の 24 週の変化量を 0.1 log MAR、標準偏差 0.124（前値と後値の標準偏差を 0.16、前値と後値の相関を 0.7 と仮定）と想定した。

一方、新生血管を伴う加齢黄斑変性症の治験 17 から 2 年間で 1.6 文字 (0.032logMAR) のプラセボ効果がシャム群で報告されている。シャム群におけるプラセボ効果も時間に対し、線形であることを仮定し本治験の主要評価の評価時点（24 週）でのシャム群のプラセボ効果を ETDRS 0.4 文字 (0.008 logMAR) 標準偏差に関しては電気刺激群と同じであることを想定した。シャム群においては、第Ⅱ相試験（試験番号 K29001）の付随研究における自然経過の悪化（2013～2017 年の logMAR 回帰式： $\log\text{MAR}=0.04709 \times \text{year} - 94.6037$  ( $p=0.002$ )) に比べれば改善されているもののベースラインからは若干悪化するような値 (-0.008 logMAR) と仮定した。

以上より、電気刺激群 0.1 logMAR、Sham 群では -0.008 log MAR、共通の標準偏差を 0.124 と仮定し、有意水準  $\alpha$  を 0.05、検出力 80 % の場合各群、22 例、機器群とシャム群の両群を合わせて 44 例が必要である。脱落率を 10 %程度と想定し各群 25 例、両群で 50 例を目標症例数とする。

## 10.3. 症例の取り扱い

原則として登録された症例については、治験調整医師及び統計解析責任者が協議の上、症例の取り扱いを決定する。新たな問題が起こった場合の症例の取り扱いについても、治験調整医師及び統計解析責任者が、協議の上、決定する。症例の取り扱いについて、協議及び決定はすべて盲検下で実施され、開鍵前ま

1  
2  
3  
4  
5  
6  
7  
8  
9  
10  
11  
12  
13  
14  
15  
16  
17  
18  
19  
20  
21  
22  
23  
24  
25  
26  
27  
28  
29  
30  
31  
32  
33  
34  
35  
36  
37  
38  
39  
40  
41  
42  
43  
44  
45  
46  
47  
48  
49  
50  
51  
52  
53  
54  
55  
56  
57  
58  
59  
60

でに完了する。

#### 10.4. データの取り扱い

データ集計・解析時におけるデータの取り扱いについては、原則として以下に示すとおりとする。疑義が生じた場合は、統計専門家と治験調整医師が協議の上データ固定前に決定する。

欠測値に対しては補完を行わない。

協議及び決定はすべて盲検下で実施され、開鍵前までに完了する。

#### 10.5. 統計解析項目及び解析計画

すべての症例において治験機器の使用が終了し、データが固定された後に解析を行う。

有効性評価において、FAS 及び PPS における解析を行う。FAS と PPS が同じとみなせる集団の時は PPS の解析は実施しない。

主要評価項目、副次評価項目及び探索的評価項目の解析は評価眼を対象に行う。

統計解析の詳細はデータ固定前に別途作成する統計解析計画書に規定する。

##### <主要評価項目>

- 24 週時における logMAR 視力（矯正小数視力から換算）の 0 週からの変化量における電気刺激群のシャム群に対する優越性

##### <副次評価項目>

- 24 週時までの副次評価項目の変化量

##### <探索的評価項目>

- 48 週時までの副次評価項目の変化量
- 副次評価項目の 24 週時点を起点とした変化量
- 副次評価項目の視力の改善割合

##### <安全性評価項目>

- 有害事象の発現状況は、治療開始前、開始後 24 週間及び 24 週以後に発現した有害事象の時点ごとの有害事象の発現割合
- 治験機器と関連性のある有害事象、重篤な有害事象及び重症度別有害事象の発現割合を、発生状況に応じ算出する
- 自覚症状は時点ごとに評価された自覚症状（角膜炎、皮膚炎、前眼部・中間透光体、顔面神経、三叉神経、鼻への影響）の発生割合

##### 10.5.1. 被験者背景の解析

各解析対象集団における被験者背景データの分布及び要約統計量を算出する。名義変数については、カテゴリの頻度及び割合を示す。連続変数については要約統計量を算出する。

## 10.5.2. 安全性及び有効性の解析

### 10.5.2.1. 主たる解析

有効性の主要評価項目は、24 週時における logMAR 視力（矯正小数視力から換算）の 0 週からの変化量である。主たる解析はシャム群と電気刺激群の 24 週時における logMAR 視力変化量が等しいという帰無仮説の検定を実施する。各群の logMAR 視力の 24 週の 0 週からの変化量（24 週-0 週）を動的割付の因子を調整因子として、共変量調整解析を行う。

### 10.5.2.2. 副次解析

本治験の主たる解析結果を補足する考察を行う目的で副次評価項目の解析を行う。副次評価項目の解析は原則主要評価項目と同様な手法を用いる。副次評価項目では 24 週までの複数時点をを用いた経時解析を実施するが多重性の調整は行わない。

### 10.5.2.3. 探索的解析

24 週以降、36 週及び 48 週のデータを含め探索的な解析を行う。探索解析では 24 週時点からの変化量を算出などの検討を行い、主要評価項目を含む副次評価項目における予後の検討を探索的に行う。

## 10.5.3. 安全性の解析

24 週までに生じた有害事象及び 24 週以後の安全性の評価項目について、発現割合および発現割合の 95 % 信頼区間を算出する。

## 10.6. データモニタリング委員会

本治験ではデータモニタリング委員会を設置する。データモニタリング委員会は治験責任医師と独立した機関として設立され、本治験とは独立した立場である 3 人以上の専門家による委員で構成される。データモニタリング委員会は、被験者の安全性を確保することを目的に、年一回程度、被験治療における有害事象発現率の比較、重篤な有害事象に関する詳細な検討等の安全性モニタリングを行う。ときにその結果を踏まえて有害事象のリスクを軽減する為に、組入れ基準の変更等の治験デザインの変更を勧告すること、あるいは治験の継続の可否を判断することもある。詳細は「データモニタリング委員会に関する標準業務手順書」に従う。

## 10.7. 最終解析

追跡期間終了後、データが得られ症例が固定された後に解析を行う。統計解析責任者が「解析報告書」をまとめ、治験調整医師及び治験責任医師に提出する。治験調整医師は解析報告書の内容を総括し、治験全体の結論、問題点、結果の解釈及び考察、今後の方針等を主として臨床的観点からまとめた「総括報告書」を作成し、治験責任医師の承認を得る。

## 11. 治験実施計画書の遵守及び逸脱

- 1) 治験責任医師又は治験分担医師は、本治験実施計画書を遵守して治験を実施する。
- 2) 治験責任医師又は治験分担医師は、治験実施計画書から逸脱した場合、すべての逸脱の詳細及び理由

を記録する。

- 3) 被験者の緊急の危機を回避するためその他医療上やむを得ない理由により実施計画書から逸脱した場合、治験責任医師は、逸脱の内容及びその理由を記載した文書を実施医療機関の長に直ちに提出するとともに、当該文書の内容を実施医療機関の長を経由して治験審査委員会に速やかに報告する。
- 4) 被験者が SARS-CoV-2 に感染した場合、濃厚接触者になった場合あるいは実施医療機関が治験の来院を中断した場合、来院治療及び検査が出来なくなる。このことは、SARS-CoV-2 に特化した状況に起因する治験実施計画書からの逸脱になることから、治験責任医師又は治験分担医師は SARS-CoV-2 に起因すると考えられる逸脱の概要を明確に記録する。

## 12. 治験実施計画書、症例報告書又は解析計画に関する変更

### 12.1. 治験実施計画書及び症例報告書の改訂

治験実施計画書及び症例報告書を改訂する場合には、以下の手順により行う。

- 1) 治験責任医師は、治験機器の品質、有効性及び安全性に関する事項、その他治験を適正に行うために重要な情報を知ったときは、必要に応じて当該治験実施計画書を改訂する。また、改訂の際には改訂履歴を作成し、それを保存する。
- 2) 治験責任医師は、必要に応じ治験実施計画書の改訂に併せて又は他の理由により症例報告書を改訂する。また、改訂の際には改訂履歴を作成し、それを保存する。
- 3) 治験責任医師は治験実施計画書改訂版及び症例報告書用紙改訂を速やかに実施医療機関の長に提出し、実施医療機関の長を経由して速やかに治験審査委員会の承認を得る。
- 4) 治験審査委員会の意見に基づく実施医療機関の長の指示が治験責任医師の許容できる範囲内で、治験実施計画書及び症例報告書用紙を修正する場合も同様の手順とする。

### 12.2. 統計解析計画の変更

統計解析責任者は、統計解析計画書の内容を変更した場合、変更内容をすべて本治験の統計解析報告書に記載する。なお、統計解析計画書の変更は、その経緯を記録に残す。

## 13. 治験の中止、中断又は終了

### 13.1. 治験全体での中止又は中断の基準

治験調整医師は、以下の情報が得られ、治験全体の続行が困難であると考えられる時には、治験責任医師と治験全体の中止又は中断について協議のうえ、決定する。

- 1) 治験機器に関する新たな安全性情報又は重篤な有害事象及び不具合情報が得られる等、治験の安全性確保が困難になった場合。
- 2) 実施医療機関が、重大な医療機器 GCP 省令違反、治験実施計画書からの重大な逸脱を行った場合。
- 3) その他、治験実施中に治験の中止・中断が必要と考えられる新たな情報が得られた場合。

### 13.2. 治験全体での中止又は中断する場合の手続き

治験調整医師は、他の治験責任医師との協議又はデータモニタリング委員会等への諮問により治験全体を中止又は中断する場合には、実施医療機関の長及び PMDA にその旨とその理由を詳細に速やかに文

書で通知する。また、治験機器施行中の被験者に対して速やかにその旨を伝え、適切な治療への変更等の適切な処理を行うものとする。

### 13.3. 個々の実施医療機関での治験の中止又は中断する場合の手続き

治験責任医師は、治験を中止又は中断した場合には、実施医療機関の長に速やかにその旨を文書で通知するとともに、中止又は中断について文書で詳細に説明する。

治験調整医師は、治験責任医師が治験を中止又は中断した旨を通知してきた場合には、中止又は中断について詳細に説明された文書により当該治験に関与するすべての治験責任医師及び PMDA に速やかに文書で通知する。

### 13.4. 治験の終了

治験責任医師は、治験終了後、実施医療機関の長に治験が終了した旨を文書で通知し、治験結果の概要を文書で報告する。

## 14. データマネジメント

### 14.1. データマネジメントの手順

データマネジメントに関する詳細な手順については、データマネジメント計画書に記載する。

### 14.2. データの収集

治験責任医師又は治験分担医師は、21 CFR Part 11、医療機器 GCP 省令及び ER/ES 指針の要件に対応した Electronic Data Capture（以下、「EDC」という。）を用いた症例報告書を作成する。治験責任医師又は治験分担医師は、症例報告書の記載内容の変更、修正又は追記に当たっては、症例報告書を作成した EDC 上でを行い、すべて電子情報として記録する。なお、治験責任医師は、治験分担医師が症例報告書を作成した場合並びに治験協力者が原資料（原データ）から症例報告書に転記した場合には、当該症例報告書が提出される前にその内容について点検し、問題がないことを確認する。治験責任医師は、最終的に電子症例報告書を電子媒体（例：CD-R 等）にて実施医療機関へ提供する。治験責任医師は、電子症例報告書の見読性、保存性を担保する。

EDC システムの使用にあたり、実施医療機関は EDC トレーニングを受講し、入力方法の詳細は別途入力マニュアルを参照する。

### 14.3. 症例報告書に直接記入され、かつ原資料（原データ）と解すべき資料の特定

- ・ 本治験においては、以下の文書などを原資料（原データ）とする。
- 1) 被験者の同意及び被験者への情報提供に関する記録、診療録、看護記録、臨床検査データ及び画像検査フィルム等症例報告書作成の基となった記録。なお、電子カルテに格納されたデータも原資料とみなす。
- 2) 治験機器施行に関する記録
- 3) 本治験に関連する指針上必要な治験に係る文書又は記録



1  
2  
3  
4  
5  
6  
7  
8  
9  
10  
11  
12  
13  
14  
15  
16  
17  
18  
19  
20  
21  
22  
23  
24  
25  
26  
27  
28  
29  
30  
31  
32  
33  
34  
35  
36  
37  
38  
39  
40  
41  
42  
43  
44  
45  
46  
47  
48  
49  
50  
51  
52  
53  
54  
55  
56  
57  
58  
59  
60

- ・ 症例報告書に記載されたデータのうち、以下に示す項目は症例報告書の記載をもって原資料（原データ）とする。ただし、診療録等に記載のある場合は、当該診療録等を原資料（原データ）とみなす。

- 1) 併用薬・併用療法の目的
- 2) 有害事象の程度、転帰（追跡調査時の結果を含む）、重篤度、治験機器との因果関係の判定及び判定根拠
- 3) 被験者の治験中止理由
- 4) 治験責任医師又は治験分担医師のコメント

## 15. 記録の保存

### 15.1. 実施医療機関による記録の保存

医療機器 GCP 省令に規定される実施医療機関において保存すべき治験に係る文書又は記録は、病院長が次の日のうちいずれかの遅い日までの期間保存する。

- 1) 当該被験機器の当該効能・効果に係る製造販売承認日（開発が中止された場合には、開発中止が決定されてから 3 年が経過した日）
- 2) 治験の中止又は終了後 3 年が経過した日

治験責任医師は、実施医療機関又は治験審査委員会が保存すべき記録について保存が不要となった場合、実施医療機関に通知する。

### 15.2. 治験責任医師による記録の保存

医療機器 GCP 省令に規定される治験責任医師が保存すべき治験に係る文書又は記録は、適切と判断される保管場所において、次のうちいずれか遅い日までの期間保存する。

- 1) 当該被験機器の当該効能・効果に係る製造販売承認日から 5 年が経過した日（開発が中止された場合には開発中止が決定された日から 3 年が経過した日）。ただし、薬機法の規定により承認後の再審査を受けなければならない医療機器で、かつ再審査が終了するまでの期間が 5 年を超えるものについては、再審査が終了する日。
- 2) 治験の中止又は終了後 3 年が経過した日。

## 16. 原資料の直接閲覧

実施医療機関の長及び治験責任医師は、モニタリング、監査及び治験審査委員会又は規制当局による調査の際に、原資料等すべての記録を閲覧できることを保証する。治験が適切に実施されていること及びデータの信頼性が十分に確保されていることを確認する。直接閲覧の方法、実施時期についてはモニタリング計画書に別途定める。

## 17. 治験の品質管理及び品質保証

### 17.1. 品質管理

- 1) 本治験実施計画書からの逸脱した行為があった場合は、治験責任医師又は治験分担医師は、本実施計画書に定めるところに従う。
- 2) 治験責任又は治験分担医師は、症例報告書を本治験実施計画書に従って作成する。

- 3) 治験責任医師は、症例報告書に記載されたすべてのデータ及びその他の記録が正確及び完全であること確認する。
- 4) 症例報告書に記載されたデータのうち、原資料と何らかの矛盾がある場合は、治験責任医師はその理由を説明する記録を作成・保存する。
- 5) 治験調整医師は、当該モニタリングの対象となる実施医療機関において当該治験に従事していない者をモニターとして指名し、治験審査委員会の審査を経たモニタリング手順書に従いモニタリングを実施させる。モニターは、下記の事項を確認する。
  - － 被験者の人権、安全及び福祉が保護されている
  - － 医療機器 GCP 省令、最新の治験実施計画書及び当該治験に係る手順書を遵守して実施している
  - － 治験責任医師又は治験分担医師から報告されたデータ等が正確かつ完全で原資料等の治験関連記録と照らし検証できる
- 6) データマネジメント責任者は、別途定めた標準業務手順書に従ってデータマネジメント計画を立案し、データの取扱い各段階で品質管理を行い、その品質を確保する。

## 17.2. 品質保証

治験調整医師は、監査に関する計画書及び業務に関する手順書を作成し、治験審査委員会の意見を踏まえて、当該計画書及び手順書に従って監査を実施させる。なお、監査担当者は、当該監査に係る治験機器の開発を担当する者でなく、また、当該監査に係る実施医療機関において当該治験の実施（その準備及び管理を含む。）及びモニタリングに従事していない者とする。

## 18. 倫理及び GCP

本治験の実施に際しては、「ヘルシンキ宣言（2013年フォルトアレザ総会改訂）」、薬機法及び医療機器 GCP 省令に従って行われる。また、本治験実施計画書及び当該治験に係る手順書を遵守して施行される。

また、治験責任医師又は治験分担医師は、被験者の選定にあたって、人権保護の観点ならびに選択基準と除外基準に基づいて被験者の健康状態、症状、年齢、性別、同意能力、治験責任医師等との依存関係、他の治験を含む臨床試験への参加の有無を十分に考慮したうえで、治験への参加を求めることの適否を慎重に検討する。

## 19. 治験審査委員会

本治験の実施に先立ち、実施医療機関の治験審査委員会は、本治験の倫理的、科学的及び医学的妥当性を審査する。本治験は、治験審査委員会の承認を得た後に実施する。治験審査委員会の審議結果が「修正の上で承認する」であった場合には、審議結果に基づいて実施計画書又は症例報告書、同意説明文書等を修正し承認した後、本治験を実施する。また、治験審査委員会は少なくとも1年に1回以上の頻度で本治験が適切に実施されているか否かを継続的に審査する。

## 20. 健康被害補償及び保険

本治験に参加した結果として被験者に健康被害が生じた場合、治験責任医師はその治療に関する医療体制の提供等必要かつ適切な処置を行う。ただし、本治験では自己負担分の医療費及び医療手当は支払わ

れない。本治験に起因する健康被害により生じた賠償責任、補償責任への対応として、治験責任医師、治験分担医師、実施医療機関及び治験調整委員会等本治験に携わる者は医師主導治験保険に加入する。

## 21. 治験に関する費用負担

本治験に係わる費用は下記のとおりとする。

- 1) 本治験で使用される治験機器は有限会社メイヨーより提供される。
- 2) 被験者の負担軽減費の支払いは、各実施医療機関が別途定める規程に従う。

## 22. 研究資金及び利益相反

本研究は、国立研究開発法人日本医療研究開発機構（AMED）医療機器開発推進研究事業の以下の研究によって実施する。

<事業名>医療機器開発推進研究事業

<プログラム名>高齢者向けまたは在宅医療の推進に資する革新的医療機器の医師主導治験・臨床研究

有限会社メイヨーは、医療機器 GCP 省令上の治験機器に関する情報は提供するが、治験の実施、解析、報告に係わることはない。

本治験の利害関係については、各実施医療機関が別途定める規程に従い適切に審議する。

## 23. 治験のデータベース登録

本治験は、最初の被験者からの同意取得前に臨床研究実施計画・研究概要公開システム（jRCT）

(<https://jrct.niph.go.jp/>) に登録を行う。

## 24. 付録

- ・ VFQ-25

## 25. 治験実施体制

本治験の実施体制は、別紙 1 参照

## 26. SARS-CoV-2 流行時における治験手順の一時的な変更

本治験実施時において SARS-CoV-2 が流行した場合、実施医療機関及び被験者に前例のない困難や問題が生じる可能性がある。過去の治験上での経験及び起こりうる危機的状況を鑑み、治療の継続及び被験者の安全性を確保しながら継続してデータを収集する治験上可能な変更について別紙 2 に記載する。

別紙 2 は暫定的な処置であり、SARS-CoV-2 の流行状況等を鑑み適宜変更する。

## 27. 参考資料・文献リスト

1. 三宅養三, 柳田和夫, 他: EER (Electrically Evoked Response) の臨床応用IV視神経疾患のEER解析. 日眼会誌 84: 2047-52, 1980.
2. Morimoto T, Miyoshi T, et al: Electrical stimulation enhances the survival of axotomized retinal ganglion cells in vivo. *Neuroreport* 13: 227-30, 2002.
3. Okazaki Y, Morimoto T, et al: Parameters of optic nerve electrical stimulation affecting neuroprotection of axotomized retinal ganglion cells in adult rats. *Neurosci Res* 61: 129-35, 2008.
4. Morimoto T, et al. Transcorneal electrical stimulation rescues axotomized retinal ganglion cells by activating endogenous retinal IGF-1 system. *Invest Ophthalmol Vis Sci.* 46: 2147-2155, 2005.
5. Sato T, et al: Direct effect of electrical stimulation on induction of brain-derived neurotrophic factor from cultured retinal Muller cells. *Invest Ophthalmol Vis Sci.* 49: 4641-464, 2008.
6. Ni YQ, et al.: Neuroprotective effect of transcorneal electrical stimulation on light-induced photoreceptor degeneration. *Exp Neurol.* 219: 439-452, 2009.
7. Ciavatta VT, et al.: Growth factor expression following implantation of microphotodiode arrays in RCS rats. *Invest Ophthalmol Vis Sci.* 47:3177, 2006.
8. Zhou WT, et al.: Electrical stimulation ameliorates light-induced photoreceptor degeneration in vitro via suppressing the proinflammatory effect of microglia and enhancing the neurotrophic potential of Muller cells. *Exp Neurol.* 238: 192-208, 2012.
9. Wang X, et al.: Neuroprotective effect of transcorneal electrical stimulation on ischemic damage in the rat retina. *Exp Eye Res.* 93: 753-760, 2011.
10. Kanamoto T, et al.: Proteomic study of retinal proteins associated with transcorneal electric stimulation in rats. *J Ophthalmol.* 2015: 1-6, 2015.
11. Fu L, et al.: Transcorneal electrical stimulation inhibits retinal microglial activation and enhances retinal ganglion cell survival after acute ocular hypertensive injury. *Transl Vis Sci Technol.* 7: 1-11, 2018.
12. Yin H, et al.: Transcorneal electrical stimulation promotes survival of retinal ganglion cells after optic nerve transection in rats accompanied by reduced microglial activation and TNF- $\alpha$  expression. *Brain Res.* 1650: 10-20, 2016.
13. Morimoto T, Fukui T, Matsushita K, Okawa Y, Shimojyo H, Kusaka S, Tano Y, Fujikado T: Evaluation of residual retinal function by pupillary constrictions and phosphenes using transcorneal electrical stimulation in patients with retinal degeneration. *Graefes Arch Clin Exp Ophthalmol.* 244: 1283-1292, 2006.
14. Schatz A, Rock T, et al. Transcorneal electrical stimulation for patients with retinitis pigmentosa: a prospective, randomized, sham-controlled exploratory study. *Invest Ophthalmol Vis Sci.* 52: 4485-4496, 2011.
15. Schatz A, Pach J, et al. Transcorneal electrical stimulation for patients with retinitis pigmentosa: a prospective, randomized, sham-controlled follow-up study over 1 year. *Invest Ophthalmol Vis Sci.* 58: 257-269, 2017.
16. Bittner AK, et al. Longevity of visual improvements following transcorneal electrical stimulation and efficacy of retreatment in three individuals with retinitis pigmentosa. *Graefes Arch Clin Exp Ophthalmol.* 256: 299-306, 2018.
17. Rosenfeld P, Brown D, et al.: Ranibizumab for neovascular age-related macular degeneration. *N Engl J Med.*

1  
2  
3 355: 1419 – 1431, 2006.  
4  
5  
6  
7  
8  
9  
10  
11  
12  
13  
14  
15  
16  
17  
18  
19  
20  
21  
22  
23  
24  
25  
26  
27  
28  
29  
30  
31  
32  
33  
34  
35  
36  
37  
38  
39  
40  
41  
42  
43  
44  
45  
46  
47  
48  
49  
50  
51  
52  
53  
54  
55  
56  
57  
58  
59  
60

For peer review only

よくお読みください

患者さんへ

網膜色素変性を対象とした経皮膚電気刺激装置の  
有効性及び安全性を検証するシャム対照二重遮蔽比較試験  
～説明および同意文書～

この冊子には、経皮膚電気刺激装置という医療機器の、効果や安全性を確かめるための臨床試験（治験）についての詳しい説明が書かれています。

この冊子をよくお読みになり、この治験の目的や方法、医療機器について十分にご理解されたうえで、治験に参加されるか否かを決めてください。担当医師の説明やこの説明文書の中で、わからないことや心配なことなどがありましたら、どんなことでも遠慮なくお尋ねください。

治験実施計画書番号：CCRC1804

(第 1.0 版)

作成日：2021 年 4 月 1 日

## 目次

|     |                             |    |
|-----|-----------------------------|----|
| 1.  | 治験とは？                       | 3  |
| 2.  | 網膜色素変性と経皮膚電気刺激装置について        | 4  |
| 3.  | 治験の目的                       | 7  |
| 4.  | この治験の方法                     | 7  |
| 5.  | この治験の参加予定期間                 | 17 |
| 6.  | 予定人数                        | 17 |
| 7.  | 利益と不利益                      | 17 |
| 8.  | 他の治療法                       | 19 |
| 9.  | 治験への参加を中止する場合について           | 19 |
| 10. | 新たに重要な情報が得られた場合について         | 20 |
| 11. | 治験に関連した健康被害の治療について          | 20 |
| 12. | 治験に参加された場合の費用について           | 20 |
| 13. | カルテなどの医療記録の閲覧と参加者の秘密の保全について | 21 |
| 14. | 知的財産権と利益相反について              | 23 |
| 15. | 治験に参加いただくことは自由です            | 23 |
| 16. | 患者さんに守っていただきたいことについて        | 23 |
| 17. | 治験を審査する委員会                  | 24 |
| 18. | 治験に関する相談窓口                  | 26 |

## 1. 治験とは？

新しい医薬品・医療機器が世の中に出て、多くの患者さんに使われるためには、国から承認を得ることが必要とされています。そのため、その効果と安全性を何段階にもわたって慎重に調べます。まずは動物実験などによって医療機器の効果と安全性が確認されます。その後、健康な方や患者さんに使っていただき、効果や安全性を詳しく調べます。このように、開発の最終段階において、人を対象に効果や安全性を確かめ、厚生労働省に「医薬品・医療機器」として認めもらうため、申請の資料を集めることを目的とした試験を「治験」、その治験で使われる機器を「治験機器」と呼んでいます。

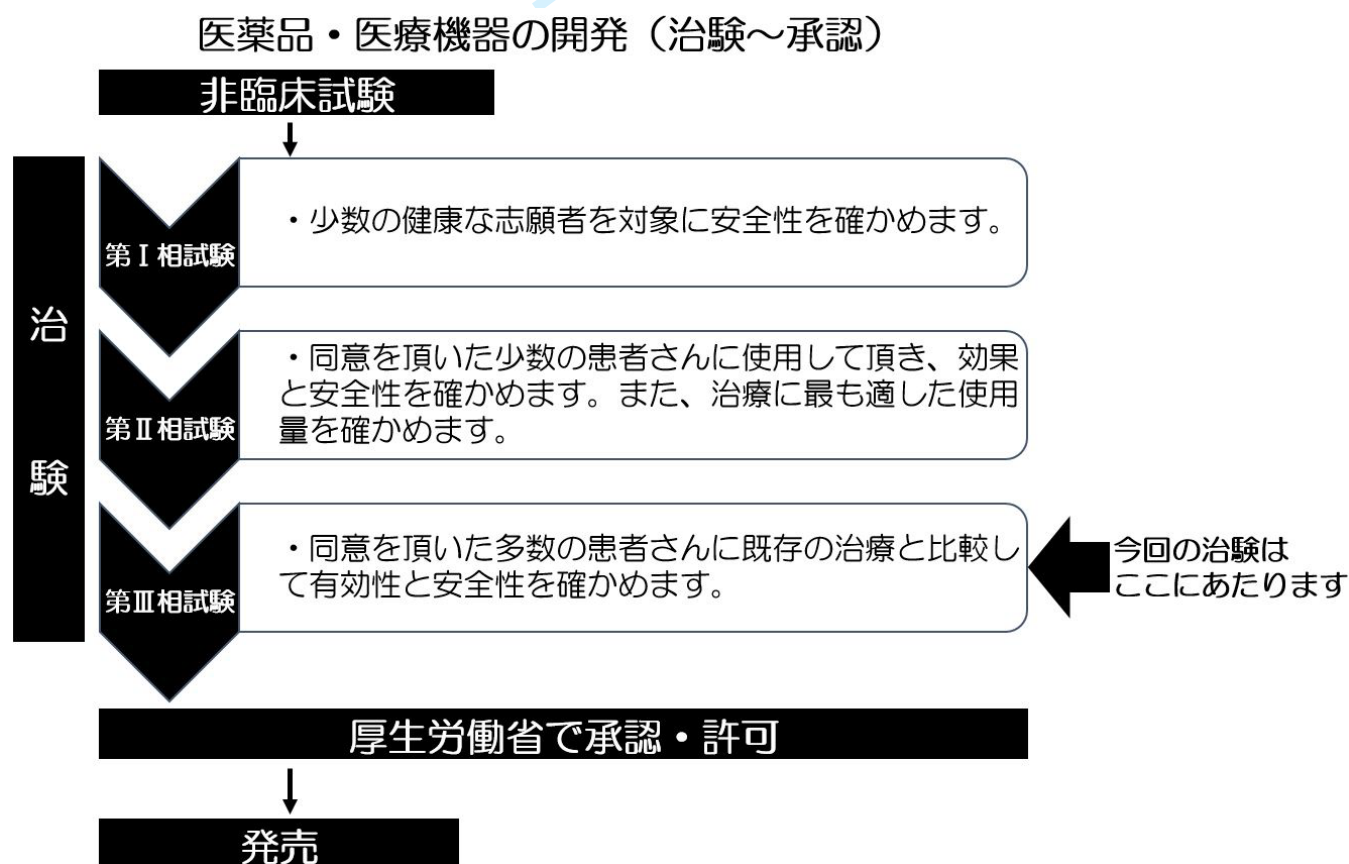



治験実施計画書番号： CCRC1804

(第 1.0 版)

作成日：2021 年 4 月 1 日

1  
2  
3  
4  
5  
6 治験は、一般の治療と異なり、研究的な側面があります。そのため、治験は参  
7  
8 加された方の安全や人権を守るために、「医薬品医療機器法」という法律と厚生  
9  
10 労働省が定めた「医療機器の臨床試験の実施の基準に関する省令（GCP）」を守  
11  
12 りながら行われます。また、当院の治験審査委員会（治験について審査する委員  
13  
14 会）で、この治験の内容に問題がないか、患者さんの人権が十分に守られている  
15  
16 か事前に審議されたうえで、治験の実施が認められています。

### 21 22 1-1 医師主導治験とは？

23  
24 今回説明をさせていただく臨床試験は、「医師主導治験」と呼ばれるもので、  
25  
26 実際の診療に携わる医師が医学的必要性・重要性を検討の上、立案・計画して行  
27  
28 うものです。これまで日本では、医療機器を開発するための治験は、医療機器を  
29  
30 開発する会社のみが実施することができました。医師は医療機器を開発する会  
31  
32 社から依頼を受けて治験をする立場であり、外国での臨床試験の結果などから  
33  
34 「この患者さんにこの機器を使ったら効果があるのではないかと考えても、自  
35  
36 ら治験を計画して実施することは出来ませんでした。しかし、2002 年に法律  
37  
38 （薬事法）が改められ、医学的に必要と考えられる機器について、医師が自ら治  
39  
40 験を計画して実施することが出来るようになりました。

## 46 47 2. 網膜色素変性と経皮膚電気刺激装置について

48  
49 〈あなたの病気について〉

50  
51 あなたの病気は、「網膜色素変性(もうまくしきそへんせい)」と診断されてい  
52  
53 ます。網膜色素変性は、目の奥（眼底）で光を感じる組織である網膜に異常がみ  
54  
55 られる病気で、4000～8000 人に 1 人の割合で起こるといわれています。眼  
56  
57  
58  
59  
60

1  
2  
3  
4  
5  
6 底の網膜で眼の中に入った光を感じ、その情報が脳へ送られて映像になります。  
7  
8 網膜には 1 億数千万個もの視細胞という光を感知する細胞が集まって構成され  
9  
10 ています。網膜色素変性はこの視細胞が、遺伝的な要因により機能しなくなって  
11  
12 しまう病気です。視細胞が働かなくなった部分は光を感じとれず、映像になりま  
13  
14 せん。

15  
16  
17 最初に現れる症状は、夜や薄暗い屋内でものが見えにくくなる夜盲(やもう)で  
18  
19 す。その後、視野(しや)狭窄(きょうさく)が少しずつ進行し、見える範囲が周辺  
20  
21 部分から中心に向かい狭くなっていきます。最近では夜でも明るい所が多いので、  
22  
23 夜盲ではなく視野狭窄によって発病に気づく人も増えています。続いて視力低  
24  
25 下を自覚するようになります。進行性の病気ですが、病状の進行速度には大きな  
26  
27 個人差がみられます。症状の進行に伴う視野の狭窄を図 1 に示します。

30  
31 図 1 網膜色素変性患者さんの視野

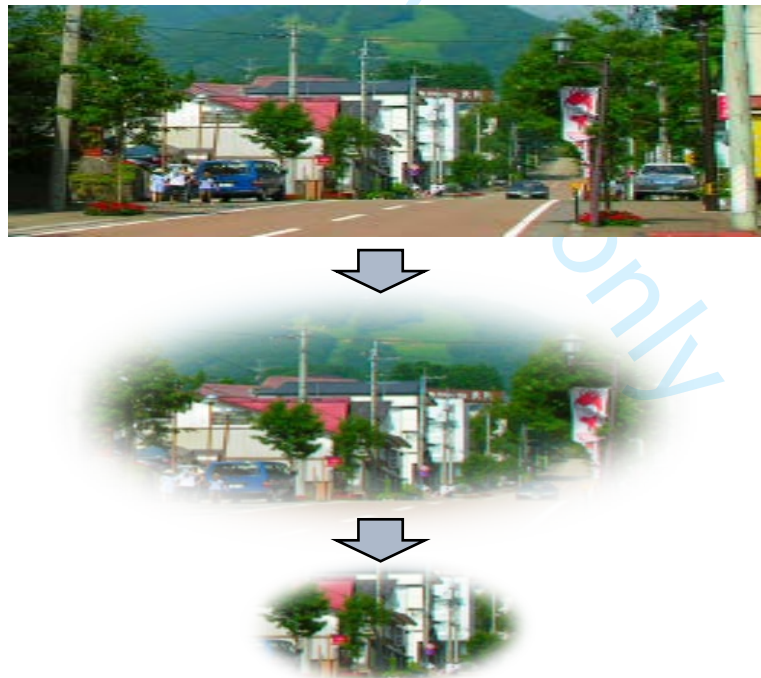

54  
55 一番上は健康な人の視野。病気の進行と共に視野狭窄が進行し(中段及び下  
56  
57 段)、視力も低下してきます。  
58  
59  
60

治験実施計画書番号： CCRC1804

(第 1.0 版)

作成日：2021 年 4 月 1 日

1  
2  
3  
4  
5  
6 網膜の視覚機能がある細胞には二種類があり、暗い所での物の見え方に関係  
7  
8 している細胞（杆体細胞<sup>かんたいさいぼう</sup>といいます）と明るい所で細かいものを見分けたり、  
9  
10 色を識別する能力に優れていて、おもに視力に関係している細胞（錐体細胞<sup>すいたさいぼう</sup>と  
11  
12 います）です。網膜色素変性では、まず杆体細胞の機能が低下するため、夜盲  
13  
14 や視野狭窄が最初の症状になり、さらに病気が進むと錐体細胞に影響し、視力が  
15  
16 低下してきます。

### 21 22 〈あなたの病気の治療法について〉

23  
24 あなたの病気（網膜色素変性）に対しては、暗順応<sup>あんじゅんのう</sup>改善薬（アダプチノール）  
25  
26 や血流改善薬（ニバジール）、ビタミン剤、酸素が高い濃度になる部屋での一定  
27  
28 時間の滞在などが、対症療法（たいしょうりょうほう）的に処方されることもあり  
29  
30 ます。ただ、これらの薬や治療方法が病気の進行を確実に遅らせているという証  
31  
32 拠は、今のところ得られていません。

33  
34 経角膜電気刺激は、コンタクトレンズ型電極を黒目（角膜）の上、もう一方の  
35  
36 電極をこめかみに置き、電気刺激装置から電極を通して電気刺激をする方法で、  
37  
38 近年、ラットやウサギを用いた動物実験において、網膜の視細胞に対して神経保  
39  
40 護的に働くことがわかってきております。そしてこの電気刺激は、ある条件のも  
41  
42 と、繰り返し行うことで効果を得られることが分かってきています。実際にヨー  
43  
44 ロッパでは、同様の機序を持つ医療機器が認証を得て臨床使用されていますが、  
45  
46 日本国内ではまだ承認されておらず、使用することができません。

47  
48 また、電極を黒目（角膜）上に置くことで、角膜に傷がついたり、ドライアイ  
49  
50 になったり、不快感を生じることがあります。それを避けるため、今回は角膜上  
51  
52 ではなく皮膚に電極を貼り付けることで電気刺激を行います。

日本国内では 10 人の網膜色素変性の患者さんに参加頂いた第Ⅱ相試験が終了しています。2 週間毎に 6 回 1 ミリアンペアによる電気刺激を網膜に与えることで、視力と視野(見える範囲)が治療前と比べて改善した結果を得ています。

さらに、患者さんの過去5年間のデータをもとに治療を行わなかった場合の視力の推移と、実際に治療を行った視力の推移を比較したところ、治療による視力改善によって長期的に視力を維持する効果が認められました。

また、電気刺激を行ったことによる身体への悪影響は認められませんでした。

### 3. 治験の目的

この研究の目的は、網膜色素変性の患者さんに対して経皮膚電気刺激療法を実施した際の、治療後の視機能への効果と安全性を調べることです。

### 4. この治験の方法

経皮膚電気刺激治療は、<sup>ひたい</sup>額と両眼の下の皮膚に電極をつけて、電気刺激装置から電極を通して電気刺激をする方法です。本治験では皮膚に電極を装着して刺激するため、角膜などの眼球への障害は無く、低侵襲で眼にやさしい治療です。この治験では、実際に電気刺激を行うグループと、電気刺激を行わないグループに 1:1 で分けて実施します。電気刺激を行わないグループをシャム群と呼びます。

グループ分けは、「無作為化(ランダム化)割り付け」という方法で行います。コンピューターで作成した乱数表を使って、ランダムにグループ分けをする方法です。どちらのグループに入るかは、あなたも担当医師も選ぶことも知ることができません。そのため、あなたが必ずしも希望するグループに入れない可能性

治験実施計画書番号：CCRC1804

(第 1.0 版)

作成日：2021 年 4 月 1 日

があります。

ご自分がどちらのグループに割り付けられたかが分かっていると、思い込みによって電気刺激の効き方が変わってしまうことがあります。このような思い込みの影響を取り除くため、どちらのグループに割り付けられたかを、あなたにはお知らせせずに治験を行います。あなたの担当医師もあなたがどちらのグループなのかを知ることができませんが、あなたの体調変化に担当医師が責任をもって対応します。

電気刺激を行うグループも行わないグループも図 2 の様に電極を 30 分間付けて頂きます。電気刺激は 1 ミリアンペアの電流を 30 分間流します。安全性の証明された範囲内の電流値ですので、危険性はほとんどありません。これらの療法は 2 週間ごとに 12 回実施します。

どちらのグループの方にも治験期間中に視覚機能に関するアンケートを計 4 回実施します。

シャム群とは・・・シャムとは見せかけの電気刺激のことです。電極を貼りますが電気刺激は行いません。思い込みによる影響を取り除き、効果や安全性を正しく判断するため世界的に認められている科学的な方法です。

#### < 刺激条件 >

電流強度：1 ミリアンペアあるいは 0 ミリアンペア

パルス幅：10 ミリセカンド/相 双極性あるいは無し

刺激頻度：20 ヘルツあるいは無し

治療時間：30 分

\* 家庭用の低周波電気によるマッサージ機器の最大電流は

20 ミリアンペアです。



図 2 皮膚電極の装着例

<この治験に参加出来る方・出来ない方>

以下のすべてに該当する方が治験に参加できます。ただし、2)、3) に関して、片眼（評価眼）が以下の基準を満たすこと（両目の場合は、右眼）。

- 1) 年齢が 20 歳以上、80 歳未満
- 2) 小数視力（通常の視力検査のことです）が 0.1 以上、0.7 以下
- 3) 視野がある程度ある方
- 4) 本治験の十分な説明を受け、ご自分の意思で同意書に署名される方
- 5) 2 週おきに 24 週間、その後 36 週目と 48 週目に来院可能な方
- 6) 適切な避妊を行うことができる方

また、上記に該当する方でも、以下のいずれかに該当する方は治験に参加できません。ただし、2)、5)、6) に関しては評価する眼が以下のいずれかに該当する方は参加できません。

- 1) 眼の病気に対する電気刺激治療を受けた方

治験実施計画書番号： CCRC1804

(第 1.0 版)

作成日：2021 年 4 月 1 日

- 2) 3 か月以内に白内障などの眼の中の手術を受けた方
- 3) 網膜色素変性用のお薬（ウノプロストン点眼薬、カルシウム拮抗薬、暗順  
 応改善薬）の使う量もしくは使い方を約 1 か月以内に変えた方
- 4) 治験期間中に使用する予定のお薬（散瞳薬、点眼麻酔薬など）に対し、ア  
 レルギーを起こしたことがある方
- 5) 網膜色素変性の他に以下の病気が眼にあると診断された方
- 硝子体黄斑牽引症候群、黄斑浮腫、黄斑前膜、後部ぶどう腫を伴う強  
 度近視のある黄斑病変、糖尿病網膜症、外眼部の炎症、感染症、重  
 度のドライアイ、網膜中心動脈閉塞症、後部虚血性視神経症、眼の  
 水晶体が茶色より濃く濁った核白内障、視力に重大な影響を及ぼすよ  
 うな前囊下及び後囊下白内障、後発白内障、視神経疾患
- 6) 最近3年間の視力検査などのデータに変化のない方
- 7) ペースメーカーもしくは除細動器が植え込まれている方
- 8) 悪性腫瘍と診断され治療中もしくは治療終了後5年以内の方
- 9) 認知症、神経疾患と診断され治療中の方
- 10) 糖尿病のコントロールが悪い方、血糖値が高い（HbA1cが10%  
 を超えている）方
- 11) 高血圧の治療を行っているが血圧が高い（最高血圧が180 mmHg以  
 上、かつ/又は、最低血圧が110 mmHg以上）方
- 12) 肝臓及び腎臓の機能に障害がある方
- 肝臓から出る酵素のAST（GOT）、かつ/又は、ALT（GPT）が施設  
 基準値の3倍を超える方

- 腎臓の機能を知る指標の血清クレアチニンが施設基準値の 1.5 倍を超える方

13) 妊娠、授乳中（授乳を中止する場合も含む）又は本治験中に妊娠を希望している方

治験参加にご同意いただいてから、治療前の視力検査、眼圧測定、眼底検査などの検査を行います。治療開始後は 2 週毎に、24 週間（約 6 か月間）の通院による治療を受けて頂き、その後 12 週間毎に 2 回通院して頂きます。通院時に行う検査としては、視力検査、眼圧測定、眼底検査、視野検査、などがあります。



治験実施計画書番号： CCRC1804  
 (第 1.0 版)  
 作成日：2021 年 4 月 1 日

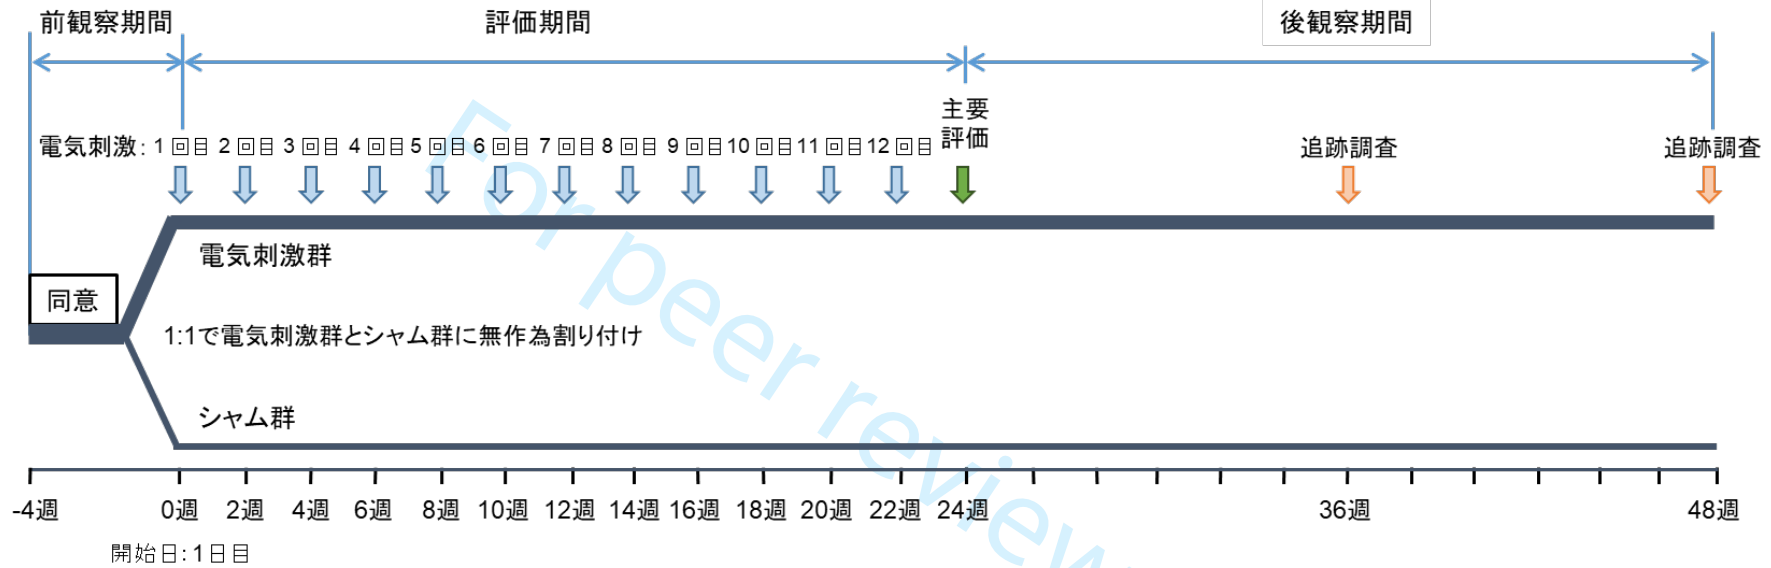

- ↓ (Blue) : 通院
- ↓ (Green) : 治療効果を見る通院日
- ↓ (Orange) : 追跡調査のための通院日

## 検査スケジュール

この治験では、次項の表 1.に示されている検査を行います。また、この治験の検査項目及び検査頻度は通常の治療の際に行う検査項目及び検査頻度とほぼ変わらないため、治験に参加したことにより通院の負担が極端に多くなるということはありません。

新型コロナウイルス感染症の影響（ご自身の感染、濃厚接触者と判断される、治験実施施設の外来が閉鎖等）で来院が出来なくなった場合でも治験は継続いたしますので、担当医師又は治験コーディネーターにご連絡下さい。次の来院等のスケジュールについてご相談させていただきます。

また、スクリーニング検査期間に最近 3 年間であなたの見えかたに変化がなかったかどうかを以前受診されていた眼科に確認することがあります。

効果に関する眼の検査（logMAR 視力；矯正小数視力、ETDRS 視力、静的視野検査 10-2 プログラム、静的視野検査 エスターマンテスト、光干渉断層計；網膜の検査）は片眼（評価眼）にのみ実施しますが、安全性に関する眼の検査（細隙灯検査、眼圧・眼底検査）は両眼に実施します。





治験実施計画書番号： CCRC1804

(第 1.0 版)

作成日：2021 年 4 月 1 日

1  
2  
3  
4  
5  
6 なお、本治験に関わるデータは、同意取得前のデータも使用することがありま  
7  
8 す。

9  
10 <表 1.の注釈説明>

- 11  
12 a) 自覚症状は経皮膚電気刺激治療実施前後に実施します。36 週目及び 48  
13 週目ではその間の体調の変化に関しましてもお聞きします。  
14  
15 b) 血圧はあなたがこの治験に入れるかどうかの検査（スクリーニング検査）時  
16 に測定し、治験期間中は病院に来られた時に必要に応じて測定します。  
17  
18 c) 臨床検査はあなたの全身状態の確認のため 11 ミリリットル程度採血して実  
19 施します。検査項目は、一般的な健康診断時の項目（ALT(GPT)、AST(GOT)、  
20 ALP、総ビリルビン、尿素窒素（BUN）、血清クレアチニン、<sup>ヘモグロビンエーワンシー</sup>Hb A1c  
21 、赤血球、白血球、ヘモグロビン、血小板）です。  
22  
23 d) 眼鏡を掛けての視力測定を実施します。測定値から logMAR 視力を算出しま  
24 す。  
25  
26 e) スクリーニング検査で、静的視野検査の計測値で信頼性が確認できなかった  
27 場合には、再測定する場合があります。  
28  
29 f) 光干渉断層計（網膜の検査）と眼底検査は散瞳してから実施します。  
30  
31 g) スクリーニング検査期間及び治療開始後 12,24,48 週間目あるいは治験中  
32 止時に視覚機能に関するアンケート（NEI VFQ 25 コンポ 9）にお答えい  
33 ただきます。アンケート用紙をお渡しいたしますので、ご自身で記載いた  
34 だき担当医師又は治験コーディネーターにお渡してください。  
35  
36 h) 妊娠可能な女性のみ尿中 hCG 検査を実施します。  
37  
38 i) 有害事象とは副作用など好ましくないすべての事象のことです。治験治療と  
39 の因果関係は問いません。  
40  
41 j) スクリーニング検査は複数日に分けて実施することも可能です。  
42  
43  
44  
45  
46  
47  
48  
49  
50  
51  
52  
53  
54  
55  
56  
57  
58  
59  
60

あなたが他の病院に通院されている場合は、その病院名と病名、使用しているお薬をお知らせ下さい。また、薬局等で購入して使用しているお薬がある場合もお知らせ下さい。これらは、治験を安全に行うために大切なことです。また、あなたが他の病院に通院されている場合は、この治験に参加していることをその病院にお知らせすることがありますので、ご了解下さい。

## 5. この治験の参加予定期間

この治験の参加予定期間は、前観察期間（31日間）、治療期間（24週間）及び後観察期間（24週間）の合計約12ヶ月となります。

また、この治験を行う期間は、2021年4月～2023年3月です。患者さんへのご案内は、2021年4月～2022年3月まで行います。

## 6. 予定人数

この治験は、日本全国で行われ、合計50名の網膜色素変性の患者さんに参加していただく予定です。

## 7. 利益と不利益

＜予測される利益と不利益＞

### 1) 利益（効果など）について

この治療を行うことによって、錐体細胞死による視機能の障害の進行速度を緩徐にすることが期待できます。あなたがこの治験に参加する事で得られた情報が将来的に網膜色素変性症の患者さんの助けになる可能性があります。しか

治験実施計画書番号： CCRC1804

(第 1.0 版)

作成日：2021 年 4 月 1 日

し、あなた自身が何らかの利益を得られる保証はありません。

## 2) 不利益（副作用など）について

以下のような不利益や副作用が考えられます。まず、治療を行ったにもかかわらず十分な効果が得られない場合があります。電気刺激ではとても少ない量の電流を流します。人によっては電極装着部位にピリピリとしたわずかな刺激を感じたり、視界の中に疑似光覚（フォスフェンとも呼びます）と呼ばれる光の波（太陽やストロボなど強い光を見た後に生じる光の残像の様なもの）を感じたりする方がいます。電気刺激を終了するといずれも感じなくなります。

今回の治験では、安全性の証明された範囲内の電流を流しますので、電気刺激自体の合併症が生じる可能性は非常に低いと推測されますが、本治験で使用する治療機器は治験機器提供者（有限会社メイヨー）と共同で新たに開発・作製したものであるため、眼及び眼周辺の器官に対する影響は厳密には確定していません。そのため眼及び眼周辺の器官において有害事象（何らかの症状）が発生する可能性は否定できません。予測される有害事象としては、電極装着部位に一致した皮膚の炎症を生じる可能性があります。軽度の炎症でしたら自然に治りますが、万が一重度の炎症を生じた場合には、適切な治療を行います。

治験に入って頂くための臨床検査を実施する際、採血を実施します。採血時に注射針をさすため、チクッと痛みを感じます。また、止血が不十分だと内出血を起こすことがあります。その際は自然に吸収されます。

この治験ではシャム群を設定しております。シャム群の治療になった場合も診察や検査も電気刺激を受けられる方と同様に通院していただきます。

## 8. 他の治療法

網膜色素変性という病気は、現在有効な治療法がありません。これまでと同様に通院していただき、その時の視機能を最大限活用できるよう支援をします。眼の合併症に関しても、適切に治療いたします。

## 9. 治験への参加を中止する場合について

あなたに治験参加の同意をいただいた後でも、この治験で事前に決められている基準に合わないことが判った場合には、治験への参加をお断りしたり、治験を中止することがありますのでご了承ください。

治験機器治療を開始した後に以下に該当することがわかった場合には、この治験への参加を中止させていただきますのでご了承ください。

- ・ 好ましくない症状などが発現し、治験機器の使用を中止すべきであると、担当医師が判断した場合
- ・ 病気の状態が変化（悪化）し、この治験を続けることが困難であると、担当医師が判断した場合
- ・ この治験で使用が禁止されている薬や療法を行った場合や行わざるを得なくなった場合
- ・ 転院や引越しなどにより、規定の通院を続けられない場合
- ・ その他、担当医師が治験を中止すべきであると判断した場合

また、これらの他に、治験の安全性に重大な影響があると考えられる情報が得られた場合など、治験を中止・中断させていただく場合もあります。治験を中止した場合にはその理由を説明させていただき、健康上に問題がないかを確認さ



治験実施計画書番号：CCRC1804

(第 1.0 版)

作成日：2021 年 4 月 1 日

せていただきます。

## 10. 新たに重要な情報が得られた場合について

この治験の参加の継続について、あなたの意思に影響を与える可能性がある  
と判断される、重要な有効性や安全性等に関する新しい情報が得られた場合に  
は、速やかにお知らせします。その場合、引き続き治験に参加するかどうか、改  
めて判断していただくことになります。

### 11. 治験に関連した健康被害の治療について

この治験は、科学的に計画され慎重に行われますが、あなたが治験参加に同意  
された後、治験中又は治験が終わった後に、この治験が原因となった健康障害が  
生じたときには、担当医師又は治験コーディネーターまでお知らせください。そ  
の時点で最善と思われる処置を行い、適切に対処した上で補償します。その際の  
医療費の一部については、あなたが加入している健康保険が使用されますので、  
一部あなた自身にご負担いただくことになります。ただし、健康被害に関して虚  
偽の申告をしたり、担当医師の指示に従わず、その障害があなた自身の過失や故  
意によるものである場合には、補償が受けられないこともあります。補償につい  
て詳しく説明を受けたい場合は、担当医師あるいは「18. 治験に関する相談窓  
口」にお問い合わせ下さい。補償について詳しい内容をご希望の方は資料をお渡  
しします。

### 12. 治験に参加された場合の費用について

#### 1) 治験期間中の医療費について

この治験に参加いただいた場合、この治験機器による治療自体は治験機器提供者（有限会社メイヨー）より無償で提供され、それに対する費用は発生しません。しかし、診察料や検査代、通常使用されている薬剤等の費用は従来どおり健康保険の種類に応じてご負担していただくことになります。

## 2) 治験中の費用の負担軽減について

治験に参加していただけることになった場合、治験のための診察や検査のために、来院する回数が通常の診療より増え、それに伴い交通費などの負担が増えることがあります。この負担を軽くするため、この治験の検査スケジュール表で決められた日の来院 1 回につき 7,000 円をお支払いします。お支払いは、病院からあなたの指定する銀行又は信用金庫の口座に振り込ませていただきます。

また、かかりつけの病院や他の医療機関で治療を受けた場合に、他院の担当医師へ電話や手紙で連絡をとり、医療情報の提供を求める場合があります。その際に他院から患者さんの情報を提供していただくにあたって、情報提供料としてあなたの費用負担が増える場合があります。その際は、あなたに給付される負担軽減費の中からお支払いいただくようお願い致します。

## 1 3. カルテなどの医療記録の閲覧と参加者の秘密の保全について

治験にご協力いただいた個人が特定されるような情報は厳重に保護され、外部に出されることはありません。患者さんから得られたデータがコード番号などに置き換えられ、報告書等でその患者さんのものであると特定されないことがないような取扱いをいたします。

この治験の結果およびあなたの過去 5 年間の検査結果の解析結果（以下、「治験のデータ」とします）は、国（厚生労働省）から経皮膚電気刺激療法を網膜色

治験実施計画書番号： CCRC1804

(第 1.0 版)

作成日：2021 年 4 月 1 日

素変性の治療法として認めってもらうために、厚生労働省に提出されることとなります。またこの治験機器の効果や安全性についてより詳細に検討するために、治験のデータとして使用された検査・画像などの治験機器の評価に必要なデータを外部の機関へ提出することがあります。さらに、この治験から得られた情報は、各地の病院から集められた記録をまとめて、学会や医学雑誌等に公表されることもあります。しかし、いずれの場合も、あなたのお名前などが用いられることはなく、あなたの個人情報（氏名、住所、電話番号等）は秘密事項として保護され、外部に漏れないように努めます。

また、治験がきちんと行われているかどうかを調べるために、治験機器の開発支援機関の担当者、この病院の治験審査委員会および厚生労働省など規制当局の職員が、カルテなどのあなたの医療に関する記録を閲覧することがあります（他科の診療記録や治験参加以前の期間も含みます）。このような場合でもこれらの関係者には秘密を守る義務が課せられており、患者さんのプライバシーは守られます。

さらに、他の医療機関で治療を受けた場合も、他院の担当医師へ電話や手紙で連絡をとり、医療情報の提供を求める場合があります。あなたがこの説明文書の最後にある同意文書に署名することにより、記録を閲覧することおよび他の医療機関からの情報収集に関しても承諾していただいたこととなります。

あなたは、診療情報の利用についていつでも同意を取り消すことができますが、その後はこの治験に参加いただけなくなりますのでご了承ください。同意を取り消したい場合は担当医師又は病院の治験コーディネーターにお伝えください。なお、同意を取り消すまでに収集された治験データは、上記と同様に利用されますが、同意を取り消された後は、この治験が正しく行われたかどうかを確認するような場合を除いて、あなたの診療情報が利用されることはありません。

#### 1 4. 知的財産権と利益相反について

本治験の結果が特許権等の知的財産を生み出す可能性があります。その場合の知的財産権は研究者もしくは所属する研究機関に帰属します。また、本治験の実施に関して、利益相反\*（起こりうる利害の衝突）が存在しないことを確認しています。

\*利益相反とは：たとえば製薬会社や医療機器製造会社から資金提供その他を受けている場合に自己や製薬会社、医療機器製造会社の利益を図り、患者さんの安全を損なったりデータの解釈をゆがめてしまう行為のことです。

#### 1 5. 治験に参加いただくことは自由です

この治験に参加するか否かの決定は、あなた自身の意思に委ねられます。また、治験に参加している途中でも、いつでも自由にやめることができます。もし参加していただかなくても、あなたが今後の治療を受ける上で不利な扱いを受けることは決してありません。

#### 1 6. 患者さんに守っていただきたいことについて

この治験への参加に同意していただいた場合は、次の事項をお守りください。

- 1) 治験参加期間中は、治験のスケジュールに従ってください。
- 2) 治験期間中に新型コロナウイルス感染症であると診断された場合および濃厚接触者と判断された場合は、出来るだけ早く担当医師又は治験コーディネーターに電話でご連絡下さい。新しい来院日を検討しお知らせいたします。
- 3) 現在、他の診療科や病院を受診している場合、またはくすりを飲んでいる

治験実施計画書番号：CCRC1804

(第 1.0 版)

作成日：2021 年 4 月 1 日

場合は、担当医師又は治験コーディネーターにその状況を詳しくお話下さい。その治療を行っている医師に、あなたがこの治験に参加されていることをお伝えさせていただきます。

また、市販のくすりを飲む場合も、前もって担当医師又は治験コーディネーターにご相談ください。

- 4) 治験中に行われる検査は、あなたの症状の変化や副作用を知るうえで大変重要なものになりますので、担当医師及び治験コーディネーターの指示に従って受けてください。
- 5) 治験機器を使用している間に、体調の変化など何か変わったことがあった場合は、担当医師あるいは治験コーディネーターにお知らせください。
- 6) 治験参加に同意いただいてから治療開始後 48 週の最終観察が終了するまでの治験参加期間は他の試験には参加しないでください。
- 7) その他にも、担当医師からの注意事項や指示にしたがってください。

## 17. 治験を審査する委員会

この治験は、以下の治験審査委員会で、科学的小よび医学的な面だけでなく、患者さんの安全や人権も含めた倫理的な面からも審査されています。治験審査委員会は、医療を専門としない委員や、当院と利害関係のない委員も含まれていません。

- 1) 名称：千葉大学医学部附属病院 治験審査委員会
- 2) 設置者：千葉大学医学部附属病院長
- 3) 所在地：〒260-8677 千葉県千葉市中央区亥鼻 1-8-1

治験を開始した後も、上記の内容が変更された場合、重篤な副作用の発現といった安全性情報が得られた場合など、この治験を継続して良いかを、当院の病院

治験実施計画書番号： CCRC1804

(第 1.0 版)

作成日：2021 年 4 月 1 日

1  
2  
3  
4  
5  
6 長からの依頼に応じて審査します。  
7

8  
9 審査の結果は当院の病院長に報告され、院長はその報告内容を基<sup>もと</sup>に当院での  
10  
11 治験の開始、継続を決定します。  
12

13  
14 なお、治験審査委員会の手順書（審査の進め方を示した文書）、議事概要（話  
15  
16 し合いの記録）や委員のリストなどの情報について知りたい場合は、ホームペー  
17  
18 ジ上でご確認ください。（URL:<http://www.ho.chiba-u.ac.jp/>）  
19  
20  
21  
22  
23  
24  
25  
26  
27  
28  
29  
30  
31  
32  
33  
34  
35  
36  
37  
38  
39  
40  
41  
42  
43  
44  
45  
46  
47  
48  
49  
50  
51  
52  
53  
54  
55  
56  
57  
58  
59  
60



医師用

## 同意文書

私は、「網膜色素変性を対象とした経皮膚電気刺激の有効性及び安全性に関する検証的試験」に参加するにあたり、治験の内容について説明を受け、十分に理解した上で、自らの自由意思により本治験に参加することに同意します。

また、治験に関する負担軽減費の支払いを受けることに

同意します

同意しません（負担軽減費はいただきません）

（どちらかの口にチェックしてください）

附随研究：私の過去のカルテ上の記録を附随研究に使用することに

同意します（使用を許可します）

同意しません

（どちらかの口にチェックしてください）

同意日：西暦 \_\_\_\_\_ 年 \_\_\_\_\_ 月 \_\_\_\_\_ 日

本人（署名又は記名捺印）： \_\_\_\_\_

担当医師 説明日：西暦 \_\_\_\_\_ 年 \_\_\_\_\_ 月 \_\_\_\_\_ 日 署名： \_\_\_\_\_

説明補助者 説明日：西暦 \_\_\_\_\_ 年 \_\_\_\_\_ 月 \_\_\_\_\_ 日 署名： \_\_\_\_\_



治験実施計画書番号：CCRC1804

(第 1.0 版)

作成日：2021 年 4 月 1 日

病院用

## 同意文書

私は、「網膜色素変性を対象とした経皮膚電気刺激の有効性及び安全性に関する検証的試験」に参加するにあたり、治験内容について説明を受け、十分に理解した上で、自らの自由意思により本治験に参加することに同意します。

また、治験に関する負担軽減費の支払いを受けることに

同意します

同意しません（負担軽減費はいただきません）

（どちらかの口にチェックしてください）

附随研究：私の過去のカルテ上の記録を附随研究に使用することに

同意します（使用を許可します）

同意しません

（どちらかの口にチェックしてください）

同意日：西暦 \_\_\_\_\_ 年 \_\_\_\_\_ 月 \_\_\_\_\_ 日

本人（署名又は記名捺印）： \_\_\_\_\_

担当医師 説明日：西暦 \_\_\_\_\_ 年 \_\_\_\_\_ 月 \_\_\_\_\_ 日 署名： \_\_\_\_\_

説明補助者 説明日：西暦 \_\_\_\_\_ 年 \_\_\_\_\_ 月 \_\_\_\_\_ 日 署名： \_\_\_\_\_

|       |
|-------|
| 患者さん用 |
|-------|

## 同意文書

私は、「網膜色素変性を対象とした経皮膚電気刺激の有効性及び安全性に関する検証的試験」に参加するにあたり、治験の内容について説明を受け、十分に理解した上で、自らの自由意思により本治験に参加することに同意します。

また、治験に関する負担軽減費の支払いを受けることに

同意します

同意しません（負担軽減費はいただきません）

（どちらかの口にチェックしてください）

附随研究：私の過去のカルテ上の記録を附随研究に使用することに

同意します（使用を許可します）

同意しません

（どちらかの口にチェックしてください）

同意日：西暦 \_\_\_\_\_ 年 \_\_\_\_\_ 月 \_\_\_\_\_ 日

本人（署名又は記名捺印）： \_\_\_\_\_

担当医師 説明日：西暦 \_\_\_\_\_ 年 \_\_\_\_\_ 月 \_\_\_\_\_ 日 署名： \_\_\_\_\_

説明補助者 説明日：西暦 \_\_\_\_\_ 年 \_\_\_\_\_ 月 \_\_\_\_\_ 日 署名： \_\_\_\_\_

## 治験機器の提供及び管理に関する手順書

網膜色素変性を対象とした経皮膚電気刺激装置の  
有効性及び安全性を検証するシャム対照二重遮蔽比較試験

自ら治験を実施する者

〇〇病院

〇〇科

〇〇 〇〇

治験調整医師（代表）

千葉大学医学部附属病院

特任教授 山本 修一

治験機器提供者

有限会社メイヨー

## 目次

|                                                         |    |
|---------------------------------------------------------|----|
| 1. 目的及び適用範囲 .....                                       | 4  |
| 2. 用語の定義 .....                                          | 4  |
| 3. 治験機器の概要 .....                                        | 4  |
| 3.1. 名称 .....                                           | 4  |
| 3.2. 形状、構造及び寸法 .....                                    | 5  |
| 3.3. 滅菌 .....                                           | 5  |
| 3.4. 治験機器製造及び提供者 .....                                  | 5  |
| 4. 包装仕様 .....                                           | 5  |
| 4.1. ラベル .....                                          | 5  |
| 4.2. 輸送時の包装形態 .....                                     | 5  |
| 5. 保存条件 .....                                           | 5  |
| 6. 治験機器の管理方法 .....                                      | 6  |
| 6.1. 治験機器の納入準備及び依頼 .....                                | 6  |
| 6.2. 治験機器の納入 .....                                      | 6  |
| 6.3. 治験機器の追加納入 .....                                    | 6  |
| 6.4. 治験機器の保管・管理 .....                                   | 6  |
| 6.5. 治験機器出庫の準備 .....                                    | 6  |
| 6.6. 治験機器の出庫 .....                                      | 6  |
| 7. 使用方法 .....                                           | 7  |
| 7.1. 治験機器の使用前点検 .....                                   | 7  |
| 7.2. 使用前準備 .....                                        | 7  |
| 7.3. 設定 .....                                           | 9  |
| 7.4. 経皮膚電気刺激の施行 .....                                   | 9  |
| 7.5. 治療の一時中断/再開 .....                                   | 10 |
| 7.6. 非常停止 .....                                         | 10 |
| 8. 不具合及び不測の事態への対応 .....                                 | 11 |
| 9. 治験機器の保管場所への返還 .....                                  | 11 |
| 10. 治験期間中の治験機器保管 .....                                  | 11 |
| 11. 保守 .....                                            | 11 |
| 12. 治験機器の治験機器提供者への返却 .....                              | 12 |
| 12.1. 不具合及び不測の事態発生時の治験機器提供者への返却 .....                   | 12 |
| 12.1.1. 使用前準備から保管庫への返還までに生じた盲検性維持に関する配慮が必要な不具合の場合 ..... | 12 |
| 12.1.2. 盲検性維持に係る配慮が不要な際の不具合等 .....                      | 12 |
| 12.2. 未使用治験機器の取扱い .....                                 | 12 |
| 12.3. 使用済治験機器の取扱い .....                                 | 12 |

|                                 |    |
|---------------------------------|----|
| 12.4. 未使用治験機器及び使用済治験機器の返却 ..... | 12 |
| 13. 治験に関係する医師等に対するガイダンス .....   | 13 |
| 13.1. 禁忌 .....                  | 13 |
| 13.2. 警告 .....                  | 13 |
| 13.3. 注意 .....                  | 13 |
| 14. 資料等の保管 .....                | 13 |
| 15. 改訂履歴 .....                  | 14 |

For peer review only

## 1. 目的及び適用範囲

本手順書は、自ら治験を実施する者、治験機器管理者、治験機器提供者及び治験調整医師（治験調整委員会）が、治験機器の授受、取り扱い、保管・管理、保守、治験機器の返却等を適切に行うための手順及びその他必要な事項を定めるものである。

## 2. 用語の定義

本手順書においては、下記の通り定める。

- ・ 治験責任医師：自ら治験を実施する者をいう。
- ・ 治験機器管理者：実施医療機関の長から指名された者をいう。
- ・ 治験機器管理補助者：治験責任医師から指名された者でアンブラインドスタッフとなる。
- ・ 治験調整医師：複数の実施医療機関において治験を行う場合に、自ら治験を実施する者により調整業務の委嘱を受けて当該業務を行う医師又は歯科医師をいう。
- ・ 治験調整委員会：複数の実施医療機関において治験を行う場合に、自ら治験を実施する者により調整業務の委嘱を受けて当該業務を行う医師又は歯科医師で構成される委員会をいう。
- ・ CRC：治験コーディネーター
- ・ CRA：臨床開発モニター
- ・ アンブラインド（非盲検）スタッフ：治験機器の治療用設置・返却及び治験機器による治療の施行のみに係る治験分担医師、治験機器管理補助者及び CRC 等をいい、治験責任医師により指名される。アンブラインドスタッフは、アクセスが厳密に管理された EDC の割付情報を知ることが出来る。アンブラインドスタッフは治験機器の不具合報告を治験機器提供者に実施し、治験責任医師に不具合があった旨の報告をする。アンブラインド治験分担医師及び CRC は治験機器による治療の準備、施行及び治験機器の片付け以外の治験業務には関与しない。アンブラインドの治験機器管理補助者は治験機器の管理を補佐する。
- ・ ブラインド（盲検）スタッフ：被験者の割付情報に関してキーオープン（開鍵）まで知り得ない治験構成員（スタッフ）である治験調整医師、治験責任医師、治験機器管理責任者、CRC 及び眼科視能訓練士等をいう。治験機器管理責任者は、治験機器の納品・返却を管理するが、盲検維持のため、治験機器の出庫や返却管理はアンブラインド治験管理補助者に一任し、治験機器管理の整合性に責任を負う。

## 3. 治験機器の概要

### 3.1. 名称

一般名（仮）：経皮膚電気刺激装置

販売名（仮）：皮膚電極網膜賦活化刺激装置（眼科用電気刺激装置）

### 3.2. 形状、構造及び寸法

形状、構造：詳細は治験機器概要書による。

本体、電極パッド、電極リード線、ACアダプター（含む、電源コード）から構成される。

寸法：本体 140×100×69 mm

重量：約 300 g

### 3.3. 滅菌

なし

### 3.4. 治験機器製造及び提供者

有限会社メイヨー

〒492-8213 愛知県稲沢市高御堂 2-25-22

Tel: : 0587-33-0120

## 4. 包装仕様

### 4.1. ラベル

治験機器の外箱及び内包に次のラベル表示がされている。

|                                   |                 |
|-----------------------------------|-----------------|
| 治験用                               | 経皮膚電気刺激装置（型番記載） |
| <注意>                              |                 |
| ・未使用機器は破棄せずに保管して治験機器提供者に返却してください。 |                 |
| ・治験以外には絶対使用しないでください。              |                 |
| <保存条件> 高温、多湿、直射日光を避けて保管すること。      |                 |
| 治験調整医師：山本 修一                      |                 |
| 職名：特任教授                           |                 |
| 住所：千葉県千葉市中央区亥鼻 1-8-1              |                 |
|                                   | 製造番号： _____     |

治験責任医師は、ラベルに治験調整医師の職名及び経皮膚電気刺激装置の製造番号（機器番号）が記載されていることを確認する。

### 4.2. 輸送時の包装形態

<内包> エアパックによる包装

<外箱> 段ボール箱

## 5. 保存条件

- 1) 室温で保存する。
- 2) 開封後は直射日光及び高温・高湿を避けること。
- 3) 保管は治験機器一式を明確に識別し保存する。電源を OFF にし、コンセントから外して上記環境下で安全に保管する。機器に関し異常を発見した場合は、治験責任医師、治験分担医師もしくは治験機

器管理者から速やかに有限会社メイヨーに連絡をし、点検により異常処置をして結果を治験担当医師に報告する。尚、治験機器管理者が予備機を代替提供する場合はその旨の記録を治験機器管理表に残す。

## 6. 治験機器の管理方法

### 6.1. 治験機器の納入準備及び依頼

- 1) 治験責任医師は、原則、納入希望日の7営業日前までに、「治験機器提供依頼書（様式1）」により、治験機器提供者及び治験調整医師（代表）に治験機器の納入希望数量、納入先、納入希望日時等を連絡する。

### 6.2. 治験機器の納入

- 1) 治験責任医師又は治験機器管理者は、「治験機器納入書 兼 受領書（様式2）」とともに治験機器、治験機器の製造年月日、製造数量等の製造に関する記録及び治験機器の品質に関する試験の記録等を治験機器提供者から受領する。提供された治験機器（電気刺激装置、電極コード、附属品一式及び電極パッド）の各数量及び治験機器に損傷等がないかを確認後、通電し各種ランプ及び液晶ディスプレイが正常に表示される等の動作確認を実施する。問題がなければ必要項目を治験機器管理表に記載し、以後の治験機器の出納を管理する。
- 2) 問題がないことを確認した上で、治験責任医師は、「治験機器納入書 兼 受領書（様式2）」を治験機器提供者へ提出し、原本を適切に保管する。
- 3) 納入時に問題があった場合は、治験機器提供者に問い合わせをするとともに、11.9及び11.10の手順に従い、「不具合等報告書（不具合・返却・紛失・廃棄） 兼 回収書（様式3）」の作成及び当該治験機器を治験機器提供者に返却する（3.4に送付先住所）。

### 6.3. 治験機器の追加納入

治験機器管理者は、治験機器の追加納入が必要となった場合、治験調整医師に連絡する。追加納入に関する手順は、本手順11.1に準ずる。

### 6.4. 治験機器の保管・管理

治験機器管理者は本手順8. 保存条件に従い、治験機器を適切に保管・管理する。

### 6.5. 治験機器出庫の準備

治験機器管理者・治験機器管理補助者は、最初の被験者の同意取得日までに、治験機器の出庫指示等の方法を治験責任医師と相談の上、決定する。

### 6.6. 治験機器の出庫

治験機器管理者は、治験責任医師又は治験分担医師の出庫指示に従って治験機器を出庫する。その際、治験機器管理表に必要事項を記載する。



- 1) 出庫指示の方法は、治験機器管理者と治験責任医師が協議して決定するが、治験責任医師、治験分担医師又は CRC が被検者の来院予定表を治験機器管理者に提出することで、出庫指示とすることが出来る。被検者の来院予定が変更になった場合は、治験責任医師、治験分担医師又は CRC が治験機器管理者に連絡する。
- 2) 治験機器管理者あるいは治験機器管理補助者、アンブラインドスタッフは、治験責任医師又は治験分担医師の出庫指示に従って治験機器を出庫する。その際、治験機器管理表に必要事項を記載する。

## 7. 使用方法

本治験機器（MyTES30 改良型）には細かな設定をデフォルトとして組み込んであり、通常の治療は電源投入後に 2 プッシュで開始できる。

操作は、TES 操作マニュアル：治療群両眼用（付録 1）及びシヤム群両眼用（付録 2）の手順に従い実施する。なお、治療群両眼用及びシヤム群両眼用のマニュアルの手順はステップ S8 及び T8「デフォルト設定変更」とステップ S10 及び T10 の電極コードが異なる以外共通である。

### 7.1. 治験機器の使用前点検

以下の作業・操作（7.1.～7.6.）はアンブラインドスタッフが実施し、盲検性を確保するためにブラインドスタッフは治療を実施する場所の近辺に立ち入らない。

- 1) 治験機器一式を（シヤム及び治療用リード線及び電極を含む）保管庫から出庫し、搬出者は治験機器管理表（本体）及び（電極パッド）に必要事項を記録し、使用前点検を実施する。
- 2) 使用前点検は治療用リード線を用い、TES 操作マニュアルの治療前点検の手順（ステップ 1～5）に従い治験機器が正常に作動することを確認し、点検実施者が記録する（治験機器管理表（本体））。
- 3) 点検実施者は治験機器による治療準備を実施するアンブラインドスタッフに治験機器一式を引き渡す。

### 7.2. 使用前準備

- 1) AC アダプターを本体に接続し、電源コードを壁面等の商用電源のコンセントに接続し、被験者に割付けられた電極リード線を本体の電極接続コネクタ（R, COM, L）に接続する。使用しない電極リード線を盲検維持のため保管する。例えば、治験機器の保管庫に戻し施錠し保管する。
- 2) 電極パッド装着前、被験者の顔の皮脂や化粧等、良く落とす。
- 3) 電極パッドを装着する。
  - ① 両眼治療時：被験者の両眼の下眼瞼耳側及び前額部の中央に電極パッドを装着し（図 A）、電極パッドの突起に電極と機器を接続するケーブルを接続する。
  - ② 片眼治療時：被験者の治療眼の真上の額部及び治療眼瞼真下の頬に黒眼部分が電極パッドのほぼ左右の中心になるように装着し（図 B）、電極パッドの突起に電極と機器を接続するケーブルを接続する。
- 4) 電源スイッチ（3）を ON にして装置の電源を入れる。本体の液晶ディスプレイ（10）に「右 1000  $\mu$ A」（上段）と「左 1000  $\mu$ A」（下段）が表示される。

- 5) 「非常停止ボタン（図3の7）を2回押し、ディスプレイを「断線検知」画面にし、ジョグスイッチ（図3-8：ダイヤル）で断線検知の無効（シャム群）もしくは有効（治療群）を選択する。

シャム群：「断線検知」無効を選択

治療群：「断線検知」有効を選択

- シャム群として無効を選択すると、電極コードに電流が流れていないことを検知せず、治療時間タイマーのカウントダウンが開始・継続し、治療時間経過後にディスプレイに「治療終了」が表示される。
- 治療群として有効を選択すると、予期せぬ電極コードの断線及び電極パッドのはく離による通電遮断が検出可能となる（「断線検出時」の項参照）。

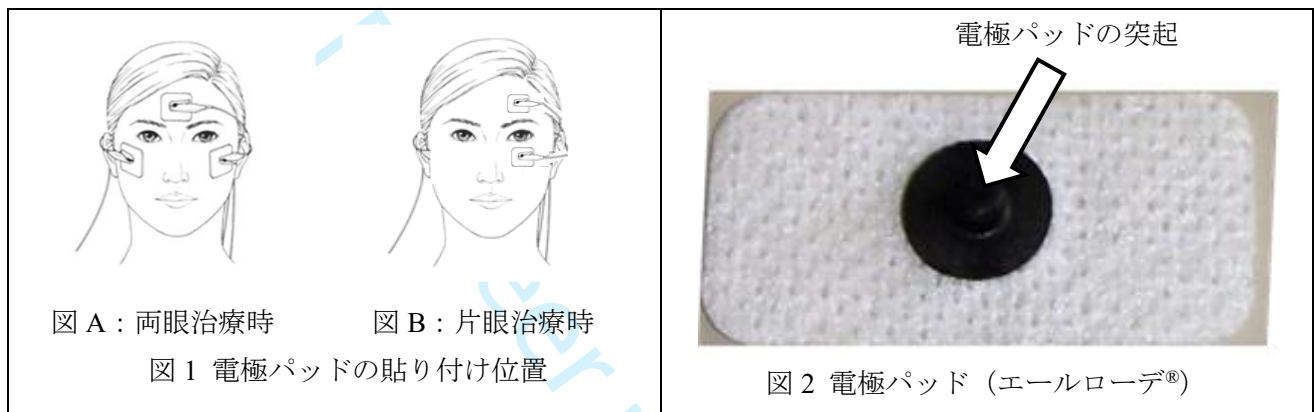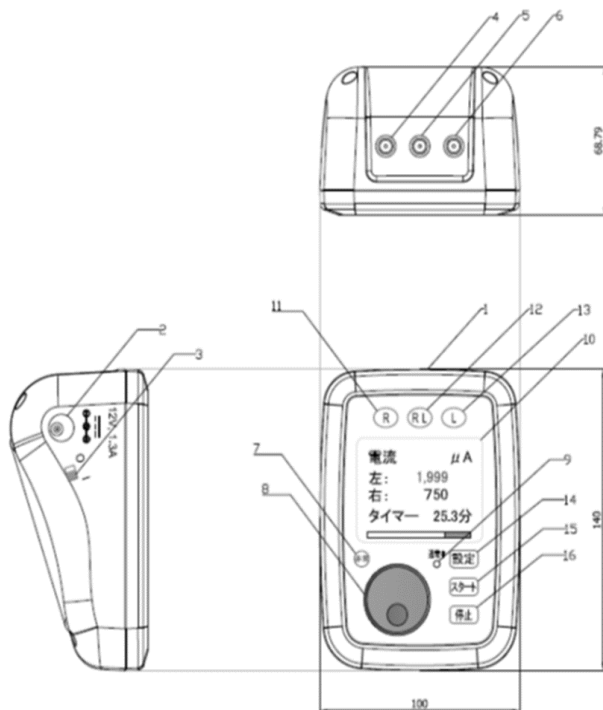

1. 本体
2. AC アダプタジャック
3. 電源スイッチ
4. 電極コネクタ (R)
5. 電極コネクタ (COM)
6. 電極コネクタ (L)
7. 非常停止ボタン
8. ダイヤル
9. 通電中ランプ
10. 液晶ディスプレイ
11. ボタンスイッチ (R)
12. ボタンスイッチ (RL)
13. ボタンスイッチ (L)
14. ボタンスイッチ (設定)
15. ボタンスイッチ (スタート)
16. ボタンスイッチ (ポーズ)

図 3 各部の名称

### 7.3. 設定

本治療ではデフォルト設定（納入時の設定）を変更しないが、参考までにデフォルトを変更する場合の操作を記載する。

- 1) デフォルト設定（納入時の設定）：電流上昇時間 20 秒、断線検知有効、治療時間 30 分、治療電流 1000  $\mu\text{A}$  に設定されている。
  - 網膜色素変性では両目が治療眼となるため、両眼（RL）を選択し、ボタン RL（12）を押す。
  - 片眼が治療眼の場合は、治療眼のボタン R（11）、L（13）のいずれかを選択する。
- 2) 電源投入後、非常停止ボタン（7）を押す。
- 3) 「電流上昇時間 10 / 20 / 30 秒」と表示され「20 秒」が太字で選択されている。変更したい場合は、ダイヤル（ジョグスイッチ、8）で秒数を選択し「設定」（14）を押す。
- 4) 非常停止ボタン（7）をもう一回押すと、「断線検知」設定が可能になる。「有効」が選択されている。変更したい場合は、ダイヤル（8）で「有効」又は「無効」を選択し「設定」（14）を押す。
- 5) 治療時間は 30 分で設定されている。変更したい場合は、初期画面で「停止」（16）を押すと「治療時間 30 分」の表示が出る。ダイヤル（8）で最大 720 分までの時間を選択できる。新しく設定した時間は 1 回のみ有効で、次には 30 分に戻る。電源を再投入してもデフォルト設定に戻る。

### 7.4. 経皮膚電気刺激の施行

初診：治療電流を 1000  $\mu\text{A}$ （1 mA）又は任意の電流に設定する場合

- 1) 電源スイッチ（3）を ON にして装置の電源を入れる。本体の液晶ディスプレイ（10）に「右 1000  $\mu\text{A}$ 」（上段）と「左 1000  $\mu\text{A}$ 」（下段）が表示される。
- 2) 最上段の「R」（右眼、11）、「RL」（両眼、12）、「L」（左眼、13）の中から治療する眼を選択する（網膜色素変性を対象とした本治療では両眼が治療眼であるため「RL」（12）を選択する）。「設定」（14）を押すと、カーソル（右 1000  $\mu\text{A}$  表示左側のピンク色バー）が「右」から「左」に移り（下に移動）、更にもう 1 回「設定」（14）を押し、「TEST」の下にカーソルを移動させる。
- 3) ダイヤル（ジョグスイッチ、8）を右に回すと「TEST」が点灯する。「スタート」（15）を押すと画面に「ジョグスイッチを操作して知覚電流を確認して下さい。」と表示され、「通電中」の赤ランプ（9）が点滅する。
- 4) 知覚電流は全て「0」と表示され、カーソルは「右」（右眼）にある。ダイヤル（8）をゆっくり右に回すと右眼の電流値が上昇し、実電流が表示される。
- 5) 治療電流（本治療では 1000  $\mu\text{A}$ ）を決めたら「設定」（14）を押しカーソルを「左」（左眼）に移動させる。決めた治療電流は知覚電流横に表示される。
- 6) 同様に左眼もダイヤル（8）をゆっくり右に回すと左眼の電流値が上昇し、実電流が表示される。
- 7) 治療電流を決めたら「スタート」（15）を押し治療開始。「そのままお待ちください。コードの状態を確認しています。」と表示される。コードが断線していないか、電極が外れていないかが自動で確認される。確認が終わり、電流（値）が設定値まで達すると、ディスプレイのタイマーカウントダウンが始まる。通電中は「通電中」ランプ（9）が点滅し、ディスプレイには $\infty$ マーク（ディスプレイ最上段の中央）が動き、電気が流れていることを示す。ディスプレイ下段には、タイマーの残り時

間を示す棒グラフも同時表示される。

- 8) 設定時間（通常 30 分）が終了すると自動的に電流は停止し治療は終了する。

#### 再診（2回目以降の治療）

- 1) 電流設定作業はせずに、すぐ治療モードに入ることができる。本試験では 1000  $\mu$ A（1 mA）で 30 分の通電を行う。
- 2) 最上段の「R」（右眼、11）、「RL」（両眼、12）、「L」（左眼、13）の中から治療する眼を選択する（網膜色素変性を対象とした本治療では両眼が治療眼であるため「RL」（12）を選択する）。
- 3) 「スタート」（15）を押せば「そのままお待ちください。コードの状態を確認しています。」と表示され、治療モードに入る。確認が終わり、電流（値）が設定値まで達すると、ディスプレイ（10）のタイマーカウントダウンが始まる。後は初診と同じで、設定時間（通常 30 分）が終了すると自動的に電流は停止し治療は終了する。

#### 断線検出時

- 1) 治療中に電極が外れてしまった場合や、コードが断線した場合には「断線検出」され、通電は自動的に停止する。例えば、通電中に左眼用電極が外れてしまった場合、「左 断線 電極貼付け後 再スタート」という表示が出る。この表示通り、外れた電極を正しい位置に戻す。
- 2) 再度「スタート」ボタン（15）を押すと、「そのままお待ちください。コードの状態を確認しています。」と表示され、電流が再度流れ、タイマーはリセットされることなく、継続して残り時間が表示される。

#### 盲検性確保のための対応

- 1) アンブラインド医師は施行の実施をカルテ等に記録する（盲検性に係る情報は記載しない）。
- 2) アンブラインド医師は、被験者から何らかの症状の訴えがあったとしてもカルテには記載しない。

#### 7.5. 治療の一時中断/再開

- 1) 治療を一時中断する場合は、「停止」（ポーズボタン、16）を押す。「通電中」ランプ（9）が消灯し、タイマーもその時点でカウントが停止する。
- 2) 再開する場合はスタートボタン（15）または停止ボタン（16）を押して、電流（値）が設定値まで達すると、タイマーカウントダウンが再開前の時間から始まる。

#### 7.6. 非常停止

- 1) 何らかの理由で、治療を中断したい場合は、「非常停止」ボタン（7）を押すと直ちに電気刺激は終了し通電中ランプ（9）が消灯し、「非常停止しました」と表示されるランプ（8）が点灯する。解除は「設定」ボタン（14）を押す。

## 8. 不具合及び不測の事態への対応

- 1) 供給時・管理保管中の治験機器に不具合、紛失及び破損等の不測の事態が起こった場合は、治験責任医師又は治験機器管理者は「不具合等報告書（不具合・返却・紛失・廃棄） 兼 回収書（様式3）」を作成し、治験機器提供者及び治験調整医師（代表）に報告する。
- 2) 治療準備中及び治療中の治験機器に不具合、紛失及び破損等の不測の事態が起こった場合は、アンブラインドスタッフは「不具合等報告書（不具合・返却・紛失・廃棄） 兼 回収書（様式3）」を作成し、治験機器提供者に報告するとともに、治験責任医師及び治験調整医師（代表）に不具合及び不測の事態が発生した旨のみを報告し、原本はアンブラインドスタッフのCRCがキーオープン時まで適切に保管し、その後治験責任医師に移管する。
- 3) ブラインド医師が被験者の安全性を評価する際、盲検性に係る情報が無いと適切な対応が出来ない場合にはキーオープン手続きをとる。
- 4) 「不具合等報告書（不具合・返却・紛失・廃棄） 兼 回収書（様式3）」作成時に疑義がある場合にはアンブラインドCRAに内容確認を依頼する。実施医療機関のアンブラインドスタッフより依頼があった場合にアンブラインドCRAは不具合等報告書（様式3）を確認する。
- 5) 治験機器の不具合の場合は、治験責任医師、治験分担医師、治験機器管理者もしくはアンブラインドスタッフは治験機器提供者に迅速な修理を依頼し、措置報告書（修理報告書、様式は規定しない）を入手する。盲検性の維持に係る事項に関してはキーオープンまでアンブラインドスタッフが措置報告書を保管し、治験責任医師には修理完了等のみの報告を行う。キーオープン後治験責任医師に措置報告書に移管する。治験責任医師、治験分担医師もしくは治験機器管理者は、治験調整委員会に治験機器の不具合への対応を報告すると共に適切に保管する。
- 6) 紛失、破損等の不測の事態の場合は、治験分担医師、治験責任医師及び治験調整委員会は、再発防止策を検討し、講じた措置内容及び実施時期を記録し適切に保管（様式は規定しない）する。必要に応じ、治験機器提供者に措置報告書を提出する。

## 9. 治験機器の保管場所への返還

- 1) アンブラインドスタッフは、経皮膚電気刺激施行後に治験機器を保管庫に返還し必要事項を記載した後、治験機器管理者あるいは治験機器管理補助者に連絡する。返還は、原則治験機器使用後の同日に行う。

## 10. 治験期間中の治験機器保管

治験機器は、施行日以外は鍵の掛かる部屋もしくは保管庫で施錠して保管する。

治験実施計画書に在宅施術が可能である旨が記載されている場合は、被験者への貸し出しに関する情報（被験者コード番号、貸出日、提供電極パット数、返却日、処分方法及び処分日）を治験機器管理者が治験機器管理表に記載する。

## 11. 保守

1年に1度、治験機器提供者による点検を受け保守点検記録を残す。記録は治験機器管理者が適切に保

管する。

## 12. 治験機器の治験機器提供者への返却

### 12.1. 不具合及び不測の事態発生時の治験機器提供者への返却

#### 12.1.1. 使用前準備から保管庫への返還までに生じた盲検性維持に関する配慮が必要な不具合の場合

- 1) 使用前準備から保管庫への返還までに生じた不具合やその他問題については、アンブラインドスタッフが盲検性を維持しながら「不具合等報告書（不具合・返却・紛失・廃棄）兼 回収書（様式3）」を作成し治験責任医師に報告する。治験責任医師は「不具合等報告書（不具合・返却・紛失・廃棄）兼 回収書（様式3）」を確認後、当該治験機器を治験機器提供者に返却する。
- 2) 治験責任医師及び治験調整委員会は、治験機器提供者により作成された不具合の原因に関する報告書を受領しアンブラインドスタッフによる確認後、キーオープンまで盲検性を維持し適切に保管する。

#### 12.1.2. 盲検性維持に係る配慮が不要な際の不具合等

- 1) 治験責任医師は、「不具合等報告書（不具合・返却・紛失・廃棄）兼 回収書（様式3）」を作成し、当該治験機器を治験機器提供者に返却する。
- 2) 治験責任医師及び治験調整委員会は、治験機器提供者により作成された不具合の原因に関する報告書を受領し適切に保管する。

### 12.2. 未使用治験機器の取扱い

- 1) 治験機器管理者は、未使用治験機器を、治験機器提供者に返却するまでの期間、他の治験機器と区分して保管し、廃棄・処分は行わない。
- 2) 治験機器管理者は、未使用治験機器を紛失、廃棄・処分した場合、その数量・理由等を「不具合等報告書（不具合・返却・紛失・廃棄）兼 回収書（様式3）」に記載し、治験機器提供者及び治験調整医師（代表）に報告し、原本を適切に保管する。

### 12.3. 使用済治験機器の取扱い

- 1) 治験機器管理者は、被験者に使用するために内包を破いた治験機器（以下、「使用済治験機器」という）を適切に廃棄・処分あるいは治験機器提供者に返却する。使用済治験機器の取り扱いについては、事前に治験調整委員会と治験機器提供者の間で取り決め文書化する。
- 2) 治験調整委員会は、使用済治験機器の取り決め文書を実施医療機関の治験責任医師に送付する。
- 3) 治験機器管理者は、使用済治験機器を治験機器提供者に返送する場合に備え、外箱及び内包を治験終了時まで適切に保管する。

### 12.4. 未使用治験機器及び使用済治験機器の返却

- 1) 治験終了後、治験機器管理者は、未使用治験機器及び使用済治験機器の数量と「治験機器管理表」に記載の数量との整合性を確認する。

治験機器の提供及び管理に関する手順書 3.0 版  
作成年月日：2021年9月10日

- 2) 治験機器管理者は、治験機器の数量に矛盾が生じた場合は、その理由について確認し、「治験機器管理表」に記録する。
- 3) 治験責任医師は、治験機器の返却にあたり「治験機器返却書 兼 受領書（様式5）」を作成する。
- 4) 治験責任医師は、「治験機器返却書 兼 受領書（様式5）」、「治験機器管理表」（写）、未使用治験機器及び使用済治験機器の外箱及び内包を治験機器提供者に返却する。その際、治験機器の外箱及び内包、「治験機器管理表」（写）等に被験者氏名及びカルテ番号等、治験機器提供者が容易に被験者を特定できるような情報が記載されている場合は、マスキング等で判読不能となるようにする。
- 5) 治験責任医師は、治験機器提供者から送付される「治験機器返却書 兼 受領書（様式5）」を受領し、適切に保管する。

### 13. 治験に関係する医師等に対するガイダンス

#### 13.1. 禁忌

心臓ペースメーカーなどの心臓疾患患者や妊娠時等の使用禁止。

#### 13.2. 警告

- 3) 電極は単回使用で、複数回の使用は接着力が低下し痛みを伴う恐れがある。
- 4) 電極の接続プラグは電極接続端子以外に接続しないこと。感電の恐れがある。
- 5) 片眼当たり1日1回30分を超える治療はしないこと。皮膚等の炎症の恐れがある。

#### 13.3. 注意

##### 一般的な注意

- 1) 電極の接触面が減ると単位面積当たりの電流が増えて痛みを感じる。貼り付け面全体が皮膚に当たるよう装着すること、装着後に外れる箇所が出る場合には被験者自身の手で軽く押さえつけると改善できる。
- 2) 本装置の接続端子には、定められたもの以外は接続しないこと。それ以外のものを接続すると感電や故障の原因になる。
- 3) 本装置は眼科専用の治験機器（治療機器）である。眼科以外の用途には使用しないこと。
- 4) 本装置を水や薬品などで濡らさないこと。感電や故障の原因になる。
- 5) 本装置の上に水や薬品等を置かないこと。それらが本装置内に入ると、感電や故障の原因になる。

##### 準備上の注意

電極を被験者に貼りつける際に、皮膚との接着が不十分な場合はテープ等を使い、貼り付け面全体が皮膚に接触するようにすること。

### 14. 資料等の保管

治験責任医師及び治験調整委員会は、別途定める「記録の保存に関する手順書」に従い、本手順書に規定された手順に係る様式及び関連資料を保管する。

## 15. 改訂履歴

| 版番号   | 改訂日        | 改訂理由／内容                |
|-------|------------|------------------------|
| 1.0 版 | 2021年3月18日 | 新規作成                   |
| 2.0 版 | 2021年5月25日 | 盲検・非盲検スタッフの業務手順の明確化のため |
| 2.1 版 | 2021年7月1日  | 記載整備                   |
| 3.0 版 | 2021年9月10日 | 盲検性確保手順の明確化のため         |

For peer review only



治験機器の提供及び管理に関する手順書 3.0 版  
作成年月日：2021 年 9 月 10 日

様式 1

20 年 月 日

## 治験機器提供依頼書

治験機器提供者

有限会社メイヨー 殿

治験調整医師（代表）

千葉大学医学部附属病院 山本 修一 殿

〇〇病院 〇〇科

治験責任医師：\_\_\_\_\_ 印

治験機器（経皮膚電気刺激装置）について、下記のとおり供給願います。

記

治験課題名：網膜色素変性を対象とした経皮膚電気刺激装置の有効性及び安全性を検証する  
シャム対照二重遮蔽比較試験

|                                                     |                                   |   |
|-----------------------------------------------------|-----------------------------------|---|
| <input type="checkbox"/> 治験機器一式（本体、電極リード線、AC アダプター） |                                   | 式 |
| <input type="checkbox"/> 治験機器構成機材のみの<br>供給依頼        | <input type="checkbox"/> 本体       | 台 |
|                                                     | <input type="checkbox"/> 電極リード線   | 組 |
|                                                     | <input type="checkbox"/> AC アダプター | 台 |
| 電極パット（1 組 3 枚）                                      |                                   | 組 |
| 納入希望日時                                              | 20 年 月 日<br>時～ 時                  |   |

以上

原本：治験責任医師保管、

写：治験機器提供者（有限会社メイヨー）、治験調整医師

様式2

20 年 月 日

## 治験機器納入書 兼 受領書

治験責任医師

〇〇病院 〇〇科 〇〇 〇〇殿

治験調整医師（代表）

千葉大学医学部附属病院 山本 修一 殿

治験機器提供者

有限会社メイヨー 印

治験機器（経皮膚電気刺激装置）について、下記のとおり納入致します。

記

治験課題名：網膜色素変性を対象とした経皮膚電気刺激装置の有効性及び安全性を検証する  
シャム対照二重遮蔽比較試験

|                                                              |                                                                                                                |
|--------------------------------------------------------------|----------------------------------------------------------------------------------------------------------------|
| <input type="checkbox"/> 治験機器一式（本体、電極リード線、ACアダプター）           | 式                                                                                                              |
| <input type="checkbox"/> 治験機器構成機材のみの納入                       | <input type="checkbox"/> 本体 台                                                                                  |
|                                                              | <input type="checkbox"/> 電極リード線 組                                                                              |
|                                                              | <input type="checkbox"/> ACアダプター 台                                                                             |
| 電極パット（1組3枚）                                                  | 組                                                                                                              |
| 添付書類： <input type="checkbox"/> 有、 <input type="checkbox"/> 無 | <input type="checkbox"/> 製造に関する記録<br><input type="checkbox"/> 品質に関する試験の記録<br><input type="checkbox"/> 校正に関する記録 |
| 納入希望日時                                                       | 20 年 月 日<br>時～ 時                                                                                               |

以上

治験機器提供者 殿

治験機器機材について、上記のと通りの受領を確認致しました。

治験責任医師（記名押印又は署名）

確認日：20 年 月 日

原本：治験責任医師保管

写：治験機器提供者（有限会社メイヨー）、治験調整医師

治験機器の提供及び管理に関する手順書 3.0 版  
作成年月日：2021年9月10日

様式 3

20 年 月 日

## 不具合等報告書（不具合・返却・紛失・廃棄） 兼 回収書

治験機器提供者 有限会社メイヨー 殿

治験調整医師（代表） 千葉大学医学部附属病院 山本 修一 殿

〇〇病院 〇〇科

治験責任医師・アンブレインドスタッフ：\_\_\_\_\_ 印

治験機器の不具合・返却・紛失・廃棄について、下記のとおり報告致します。

記

治験課題名：網膜色素変性を対象とした経皮膚電気刺激装置の有効性及び安全性を検証する  
シャム対照二重遮蔽比較試験

|             |   |                                                                                                          |
|-------------|---|----------------------------------------------------------------------------------------------------------|
| 本体製造番号      |   | <input type="checkbox"/> 未使用、 <input type="checkbox"/> 使用済（治験使用）<br><input type="checkbox"/> 使用済（不具合による） |
| 本体製造番号      |   | <input type="checkbox"/> 未使用、 <input type="checkbox"/> 使用済（治験使用）<br><input type="checkbox"/> 使用済（不具合による） |
| 電極パット(1組3枚) |   | 組                                                                                                        |
| ACアダプター     | 台 | 電極リード線 組                                                                                                 |

不具合・返却・紛失・廃棄（外箱、内包を含む）の理由

以上

-----  
治験責任医師／アンブレインドスタッフ 殿

治験機器に関する上記内容を確認・回収致しました。

確認者（記名押印又は署名）

確認日：20 年 月 日 \_\_\_\_\_

原本：治験機器提供者（有限会社メイヨー）保管

写：治験責任医師、治験調整事務局

治験機器の提供及び管理に関する手順書 3.0 版  
作成年月日：2021 年 9 月 10 日

様式 4

20 年 月 日

## 治験機器定期点検依頼書 兼 受領書

治験機器提供者

有限会社メイヨー 殿

写) 治験調整事務局

〇〇病院 〇〇科

治験責任医師：\_\_\_\_\_ 印

下記治験機器（経皮膚電気刺激装置）について、定期点検を依頼致します。

記

治験課題名：網膜色素変性を対象とした経皮膚電気刺激装置の有効性及び安全性を検証する  
シャム対照二重遮蔽比較試験

|           |      |
|-----------|------|
| 本体数（製造番号） | 台（ ） |
|-----------|------|

送付先：〒492-8213 愛知県稲沢市高御堂二丁目 25 番 22 号

有限会社メイヨー 吉川 眞男 Tel：0587-33-0120

返送先：\_\_\_\_\_

以上

治験責任医師 殿

定期点検対象の上記治験機器を受領致しました。

有限会社メイヨー（記名押印又は署名）

受領日：20 年 月 日 \_\_\_\_\_

原本：治験機器提供者（有限会社メイヨー）保管

写：治験責任医師、治験調整事務局

治験機器管理表（本体）

様式 5

2020年 月 日

## 治験機器返却書 兼 受領書

治験責任医師

〇〇病院 〇〇科

〇〇 〇〇殿

写) 治験調整事務局

治験機器提供者

有限会社メイヨー 印

下記治験機器（経皮膚電気刺激装置）について、点検を終了し返却致します。

記

治験課題名：網膜色素変性を対象とした経皮膚電気刺激装置の有効性及び安全性を検証する  
 シャム対照二重遮蔽比較試験

|           |                 |
|-----------|-----------------|
| 本体数（製造番号） | 台（ ）            |
| 添付資料      | 治験機器の校正結果報告書 1部 |

以上

治験機器提供者 殿

上記治験機器（経皮膚電気刺激装置）の点検後の返却を確認致しました。

治験責任医師（記名押印又は署名）

受領日：20 年 月 日





# Reporting checklist for protocol of a clinical trial.

Based on the SPIRIT guidelines.

## Instructions to authors

Complete this checklist by entering the page numbers from your manuscript where readers will find each of the items listed below.

Your article may not currently address all the items on the checklist. Please modify your text to include the missing information. If you are certain that an item does not apply, please write "n/a" and provide a short explanation.

Upload your completed checklist as an extra file when you submit to a journal.

In your methods section, say that you used the SPIRIT reporting guidelines, and cite them as:

Chan A-W, Tetzlaff JM, Gøtzsche PC, Altman DG, Mann H, Berlin J, Dickersin K, Hróbjartsson A, Schulz KF, Parulekar WR, Krleža-Jerić K, Laupacis A, Moher D. SPIRIT 2013 Explanation and Elaboration: Guidance for protocols of clinical trials. *BMJ*. 2013;346:e7586

|                                             |                     | Reporting Item                                                                                               | Page Number |
|---------------------------------------------|---------------------|--------------------------------------------------------------------------------------------------------------|-------------|
| <b>Administrative information</b>           |                     |                                                                                                              |             |
| Title                                       | <a href="#">#1</a>  | Descriptive title identifying the study design, population, interventions, and, if applicable, trial acronym | 1           |
| Trial registration                          | <a href="#">#2a</a> | Trial identifier and registry name. If not yet registered, name of intended registry                         | 3           |
| Trial registration: data set                | <a href="#">#2b</a> | All items from the World Health Organization Trial Registration Data Set                                     | 13          |
| Protocol version                            | <a href="#">#3</a>  | Date and version identifier                                                                                  | 3           |
| Funding                                     | <a href="#">#4</a>  | Sources and types of financial, material, and other support                                                  | 22          |
| Roles and responsibilities: contributorship | <a href="#">#5a</a> | Names, affiliations, and roles of protocol contributors                                                      | 22          |



|    |                           |                     |                                                                    |    |
|----|---------------------------|---------------------|--------------------------------------------------------------------|----|
| 1  | Roles and                 | <a href="#">#5b</a> | Name and contact information for the trial sponsor                 | 22 |
| 2  | responsibilities:         |                     |                                                                    |    |
| 3  | sponsor contact           |                     |                                                                    |    |
| 4  | information               |                     |                                                                    |    |
| 5  |                           |                     |                                                                    |    |
| 6  |                           |                     |                                                                    |    |
| 7  |                           |                     |                                                                    |    |
| 8  | Roles and                 | <a href="#">#5c</a> | Role of study sponsor and funders, if any, in study design;        | 26 |
| 9  | responsibilities:         |                     | collection, management, analysis, and interpretation of data;      |    |
| 10 | sponsor and funder        |                     | writing of the report; and the decision to submit the report for   |    |
| 11 |                           |                     | publication, including whether they will have ultimate authority   |    |
| 12 |                           |                     | over any of these activities                                       |    |
| 13 |                           |                     |                                                                    |    |
| 14 |                           |                     |                                                                    |    |
| 15 |                           |                     |                                                                    |    |
| 16 | Roles and                 | <a href="#">#5d</a> | Composition, roles, and responsibilities of the coordinating       | 16 |
| 17 | responsibilities:         |                     | centre, steering committee, endpoint adjudication committee,       |    |
| 18 | committees                |                     | data management team, and other individuals or groups              |    |
| 19 |                           |                     | overseeing the trial, if applicable (see Item 21a for data         |    |
| 20 |                           |                     | monitoring committee)                                              |    |
| 21 |                           |                     |                                                                    |    |
| 22 |                           |                     |                                                                    |    |
| 23 |                           |                     |                                                                    |    |
| 24 | <b>Introduction</b>       |                     |                                                                    |    |
| 25 |                           |                     |                                                                    |    |
| 26 |                           |                     |                                                                    |    |
| 27 | Background and            | <a href="#">#6a</a> | Description of research question and justification for undertaking | 5  |
| 28 | rationale                 |                     | the trial, including summary of relevant studies (published and    |    |
| 29 |                           |                     | unpublished) examining benefits and harms for each intervention    |    |
| 30 |                           |                     |                                                                    |    |
| 31 |                           |                     |                                                                    |    |
| 32 | Background and            | <a href="#">#6b</a> | Explanation for choice of comparators                              | 5  |
| 33 | rationale: choice of      |                     |                                                                    |    |
| 34 | comparators               |                     |                                                                    |    |
| 35 |                           |                     |                                                                    |    |
| 36 |                           |                     |                                                                    |    |
| 37 | Objectives                | <a href="#">#7</a>  | Specific objectives or hypotheses                                  | 6  |
| 38 |                           |                     |                                                                    |    |
| 39 |                           |                     |                                                                    |    |
| 40 | Trial design              | <a href="#">#8</a>  | Description of trial design including type of trial (eg, parallel  | 6  |
| 41 |                           |                     | group, crossover, factorial, single group), allocation ratio, and  |    |
| 42 |                           |                     | framework (eg, superiority, equivalence, non-inferiority,          |    |
| 43 |                           |                     | exploratory)                                                       |    |
| 44 |                           |                     |                                                                    |    |
| 45 |                           |                     |                                                                    |    |
| 46 | <b>Methods:</b>           |                     |                                                                    |    |
| 47 | <b>Participants,</b>      |                     |                                                                    |    |
| 48 | <b>interventions, and</b> |                     |                                                                    |    |
| 49 | <b>outcomes</b>           |                     |                                                                    |    |
| 50 |                           |                     |                                                                    |    |
| 51 |                           |                     |                                                                    |    |
| 52 |                           |                     |                                                                    |    |
| 53 | Study setting             | <a href="#">#9</a>  | Description of study settings (eg, community clinic, academic      | 6  |
| 54 |                           |                     | hospital) and list of countries where data will be collected.      |    |
| 55 |                           |                     | Reference to where list of study sites can be obtained             |    |
| 56 |                           |                     |                                                                    |    |
| 57 |                           |                     |                                                                    |    |
| 58 |                           |                     |                                                                    |    |
| 59 |                           |                     |                                                                    |    |
| 60 |                           |                     |                                                                    |    |

|    |                              |                      |                                                                                                                                                                                                                                                                                                                                                                                |    |
|----|------------------------------|----------------------|--------------------------------------------------------------------------------------------------------------------------------------------------------------------------------------------------------------------------------------------------------------------------------------------------------------------------------------------------------------------------------|----|
| 1  | Eligibility criteria         | <a href="#">#10</a>  | Inclusion and exclusion criteria for participants. If applicable, eligibility criteria for study centres and individuals who will perform the interventions (eg, surgeons, psychotherapists)                                                                                                                                                                                   | 10 |
| 2  |                              |                      |                                                                                                                                                                                                                                                                                                                                                                                |    |
| 3  |                              |                      |                                                                                                                                                                                                                                                                                                                                                                                |    |
| 4  |                              |                      |                                                                                                                                                                                                                                                                                                                                                                                |    |
| 5  |                              |                      |                                                                                                                                                                                                                                                                                                                                                                                |    |
| 6  | Interventions:               | <a href="#">#11a</a> | Interventions for each group with sufficient detail to allow replication, including how and when they will be administered                                                                                                                                                                                                                                                     | 13 |
| 7  | description                  |                      |                                                                                                                                                                                                                                                                                                                                                                                |    |
| 8  |                              |                      |                                                                                                                                                                                                                                                                                                                                                                                |    |
| 9  |                              |                      |                                                                                                                                                                                                                                                                                                                                                                                |    |
| 10 | Interventions:               | <a href="#">#11b</a> | Criteria for discontinuing or modifying allocated interventions for a given trial participant (eg, drug dose change in response to harms, participant request, or improving / worsening disease)                                                                                                                                                                               | 15 |
| 11 | modifications                |                      |                                                                                                                                                                                                                                                                                                                                                                                |    |
| 12 |                              |                      |                                                                                                                                                                                                                                                                                                                                                                                |    |
| 13 |                              |                      |                                                                                                                                                                                                                                                                                                                                                                                |    |
| 14 |                              |                      |                                                                                                                                                                                                                                                                                                                                                                                |    |
| 15 | Interventions:               | <a href="#">#11c</a> | Strategies to improve adherence to intervention protocols, and any procedures for monitoring adherence (eg, drug tablet return; laboratory tests)                                                                                                                                                                                                                              | 15 |
| 16 | adherence                    |                      |                                                                                                                                                                                                                                                                                                                                                                                |    |
| 17 |                              |                      |                                                                                                                                                                                                                                                                                                                                                                                |    |
| 18 |                              |                      |                                                                                                                                                                                                                                                                                                                                                                                |    |
| 19 |                              |                      |                                                                                                                                                                                                                                                                                                                                                                                |    |
| 20 | Interventions:               | <a href="#">#11d</a> | Relevant concomitant care and interventions that are permitted or prohibited during the trial                                                                                                                                                                                                                                                                                  | 12 |
| 21 | concomitant care             |                      |                                                                                                                                                                                                                                                                                                                                                                                |    |
| 22 |                              |                      |                                                                                                                                                                                                                                                                                                                                                                                |    |
| 23 |                              |                      |                                                                                                                                                                                                                                                                                                                                                                                |    |
| 24 | Outcomes                     | <a href="#">#12</a>  | Primary, secondary, and other outcomes, including the specific measurement variable (eg, systolic blood pressure), analysis metric (eg, change from baseline, final value, time to event), method of aggregation (eg, median, proportion), and time point for each outcome. Explanation of the clinical relevance of chosen efficacy and harm outcomes is strongly recommended | 9  |
| 25 |                              |                      |                                                                                                                                                                                                                                                                                                                                                                                |    |
| 26 |                              |                      |                                                                                                                                                                                                                                                                                                                                                                                |    |
| 27 |                              |                      |                                                                                                                                                                                                                                                                                                                                                                                |    |
| 28 |                              |                      |                                                                                                                                                                                                                                                                                                                                                                                |    |
| 29 |                              |                      |                                                                                                                                                                                                                                                                                                                                                                                |    |
| 30 |                              |                      |                                                                                                                                                                                                                                                                                                                                                                                |    |
| 31 |                              |                      |                                                                                                                                                                                                                                                                                                                                                                                |    |
| 32 |                              |                      |                                                                                                                                                                                                                                                                                                                                                                                |    |
| 33 |                              |                      |                                                                                                                                                                                                                                                                                                                                                                                |    |
| 34 | Participant timeline         | <a href="#">#13</a>  | Time schedule of enrolment, interventions (including any run-ins and washouts), assessments, and visits for participants. A schematic diagram is highly recommended (see Figure)                                                                                                                                                                                               | 8  |
| 35 |                              |                      |                                                                                                                                                                                                                                                                                                                                                                                |    |
| 36 |                              |                      |                                                                                                                                                                                                                                                                                                                                                                                |    |
| 37 |                              |                      |                                                                                                                                                                                                                                                                                                                                                                                |    |
| 38 |                              |                      |                                                                                                                                                                                                                                                                                                                                                                                |    |
| 39 |                              |                      |                                                                                                                                                                                                                                                                                                                                                                                |    |
| 40 | Sample size                  | <a href="#">#14</a>  | Estimated number of participants needed to achieve study objectives and how it was determined, including clinical and statistical assumptions supporting any sample size calculations                                                                                                                                                                                          | 18 |
| 41 |                              |                      |                                                                                                                                                                                                                                                                                                                                                                                |    |
| 42 |                              |                      |                                                                                                                                                                                                                                                                                                                                                                                |    |
| 43 |                              |                      |                                                                                                                                                                                                                                                                                                                                                                                |    |
| 44 |                              |                      |                                                                                                                                                                                                                                                                                                                                                                                |    |
| 45 | Recruitment                  | <a href="#">#15</a>  | Strategies for achieving adequate participant enrolment to reach target sample size                                                                                                                                                                                                                                                                                            | 20 |
| 46 |                              |                      |                                                                                                                                                                                                                                                                                                                                                                                |    |
| 47 |                              |                      |                                                                                                                                                                                                                                                                                                                                                                                |    |
| 48 |                              |                      |                                                                                                                                                                                                                                                                                                                                                                                |    |
| 49 | <b>Methods: Assignment</b>   |                      |                                                                                                                                                                                                                                                                                                                                                                                |    |
| 50 | <b>of interventions (for</b> |                      |                                                                                                                                                                                                                                                                                                                                                                                |    |
| 51 | <b>controlled trials)</b>    |                      |                                                                                                                                                                                                                                                                                                                                                                                |    |
| 52 |                              |                      |                                                                                                                                                                                                                                                                                                                                                                                |    |
| 53 |                              |                      |                                                                                                                                                                                                                                                                                                                                                                                |    |
| 54 | Allocation: sequence         | <a href="#">#16a</a> | Method of generating the allocation sequence (eg, computer-generated random numbers), and list of any factors for stratification. To reduce predictability of a random sequence, details of any planned restriction (eg, blocking) should be                                                                                                                                   | 13 |
| 55 | generation                   |                      |                                                                                                                                                                                                                                                                                                                                                                                |    |
| 56 |                              |                      |                                                                                                                                                                                                                                                                                                                                                                                |    |
| 57 |                              |                      |                                                                                                                                                                                                                                                                                                                                                                                |    |
| 58 |                              |                      |                                                                                                                                                                                                                                                                                                                                                                                |    |
| 59 |                              |                      |                                                                                                                                                                                                                                                                                                                                                                                |    |
| 60 |                              |                      |                                                                                                                                                                                                                                                                                                                                                                                |    |

provided in a separate document that is unavailable to those who enrol participants or assign interventions

|                                                           |                      |                                                                                                                                                                                                                                                                                                                                                                                                              |    |
|-----------------------------------------------------------|----------------------|--------------------------------------------------------------------------------------------------------------------------------------------------------------------------------------------------------------------------------------------------------------------------------------------------------------------------------------------------------------------------------------------------------------|----|
| Allocation concealment mechanism                          | <a href="#">#16b</a> | Mechanism of implementing the allocation sequence (eg, central telephone; sequentially numbered, opaque, sealed envelopes), describing any steps to conceal the sequence until interventions are assigned                                                                                                                                                                                                    | 14 |
| Allocation: implementation                                | <a href="#">#16c</a> | Who will generate the allocation sequence, who will enrol participants, and who will assign participants to interventions                                                                                                                                                                                                                                                                                    | 13 |
| Blinding (masking)                                        | <a href="#">#17a</a> | Who will be blinded after assignment to interventions (eg, trial participants, care providers, outcome assessors, data analysts), and how                                                                                                                                                                                                                                                                    | 14 |
| Blinding (masking): emergency unblinding                  | <a href="#">#17b</a> | If blinded, circumstances under which unblinding is permissible, and procedure for revealing a participant's allocated intervention during the trial                                                                                                                                                                                                                                                         | 16 |
| <b>Methods: Data collection, management, and analysis</b> |                      |                                                                                                                                                                                                                                                                                                                                                                                                              |    |
| Data collection plan                                      | <a href="#">#18a</a> | Plans for assessment and collection of outcome, baseline, and other trial data, including any related processes to promote data quality (eg, duplicate measurements, training of assessors) and a description of study instruments (eg, questionnaires, laboratory tests) along with their reliability and validity, if known. Reference to where data collection forms can be found, if not in the protocol | 14 |
| Data collection plan: retention                           | <a href="#">#18b</a> | Plans to promote participant retention and complete follow-up, including list of any outcome data to be collected for participants who discontinue or deviate from intervention protocols                                                                                                                                                                                                                    | 14 |
| Data management                                           | <a href="#">#19</a>  | Plans for data entry, coding, security, and storage, including any related processes to promote data quality (eg, double data entry; range checks for data values). Reference to where details of data management procedures can be found, if not in the protocol                                                                                                                                            | 13 |
| Statistics: outcomes                                      | <a href="#">#20a</a> | Statistical methods for analysing primary and secondary outcomes. Reference to where other details of the statistical analysis plan can be found, if not in the protocol                                                                                                                                                                                                                                     | 17 |

|    |                            |                      |                                                                    |    |
|----|----------------------------|----------------------|--------------------------------------------------------------------|----|
| 1  | Statistics: additional     | <a href="#">#20b</a> | Methods for any additional analyses (eg, subgroup and adjusted     | NA |
| 2  | analyses                   |                      | analyses)                                                          |    |
| 3  |                            |                      |                                                                    |    |
| 4  | Statistics: analysis       | <a href="#">#20c</a> | Definition of analysis population relating to protocol non-        | 17 |
| 5  | population and missing     |                      | adherence (eg, as randomised analysis), and any statistical        |    |
| 6  | data                       |                      | methods to handle missing data (eg, multiple imputation)           |    |
| 7  |                            |                      |                                                                    |    |
| 8  |                            |                      |                                                                    |    |
| 9  |                            |                      |                                                                    |    |
| 10 | <b>Methods: Monitoring</b> |                      |                                                                    |    |
| 11 |                            |                      |                                                                    |    |
| 12 | Data monitoring:           | <a href="#">#21a</a> | Composition of data monitoring committee (DMC); summary of         | 16 |
| 13 | formal committee           |                      | its role and reporting structure; statement of whether it is       |    |
| 14 |                            |                      | independent from the sponsor and competing interests; and          |    |
| 15 |                            |                      | reference to where further details about its charter can be found, |    |
| 16 |                            |                      | if not in the protocol. Alternatively, an explanation of why a     |    |
| 17 |                            |                      | DMC is not needed                                                  |    |
| 18 |                            |                      |                                                                    |    |
| 19 |                            |                      |                                                                    |    |
| 20 |                            |                      |                                                                    |    |
| 21 |                            |                      |                                                                    |    |
| 22 | Data monitoring:           | <a href="#">#21b</a> | Description of any interim analyses and stopping guidelines,       | 19 |
| 23 | interim analysis           |                      | including who will have access to these interim results and make   |    |
| 24 |                            |                      | the final decision to terminate the trial                          |    |
| 25 |                            |                      |                                                                    |    |
| 26 |                            |                      |                                                                    |    |
| 27 | Harms                      | <a href="#">#22</a>  | Plans for collecting, assessing, reporting, and managing solicited | 15 |
| 28 |                            |                      | and spontaneously reported adverse events and other unintended     |    |
| 29 |                            |                      | effects of trial interventions or trial conduct                    |    |
| 30 |                            |                      |                                                                    |    |
| 31 |                            |                      |                                                                    |    |
| 32 |                            |                      |                                                                    |    |
| 33 | Auditing                   | <a href="#">#23</a>  | Frequency and procedures for auditing trial conduct, if any, and   | 15 |
| 34 |                            |                      | whether the process will be independent from investigators and     |    |
| 35 |                            |                      | the sponsor                                                        |    |
| 36 |                            |                      |                                                                    |    |
| 37 |                            |                      |                                                                    |    |
| 38 | <b>Ethics and</b>          |                      |                                                                    |    |
| 39 | <b>dissemination</b>       |                      |                                                                    |    |
| 40 |                            |                      |                                                                    |    |
| 41 |                            |                      |                                                                    |    |
| 42 | Research ethics            | <a href="#">#24</a>  | Plans for seeking research ethics committee / institutional review | 3  |
| 43 | approval                   |                      | board (REC / IRB) approval                                         |    |
| 44 |                            |                      |                                                                    |    |
| 45 |                            |                      |                                                                    |    |
| 46 | Protocol amendments        | <a href="#">#25</a>  | Plans for communicating important protocol modifications (eg,      | 10 |
| 47 |                            |                      | changes to eligibility criteria, outcomes, analyses) to relevant   |    |
| 48 |                            |                      | parties (eg, investigators, REC / IRBs, trial participants, trial  |    |
| 49 |                            |                      | registries, journals, regulators)                                  |    |
| 50 |                            |                      |                                                                    |    |
| 51 |                            |                      |                                                                    |    |
| 52 |                            |                      |                                                                    |    |
| 53 | Consent or assent          | <a href="#">#26a</a> | Who will obtain informed consent or assent from potential trial    | 24 |
| 54 |                            |                      | participants or authorised surrogates, and how (see Item 32)       |    |
| 55 |                            |                      |                                                                    |    |
| 56 |                            |                      |                                                                    |    |
| 57 |                            |                      |                                                                    |    |
| 58 |                            |                      |                                                                    |    |
| 59 |                            |                      |                                                                    |    |
| 60 |                            |                      |                                                                    |    |

|    |                          |                      |                                                                      |    |
|----|--------------------------|----------------------|----------------------------------------------------------------------|----|
| 1  | Consent or assent:       | <a href="#">#26b</a> | Additional consent provisions for collection and use of              | NA |
| 2  | ancillary studies        |                      | participant data and biological specimens in ancillary studies, if   |    |
| 3  |                          |                      | applicable                                                           |    |
| 4  |                          |                      |                                                                      |    |
| 5  |                          |                      |                                                                      |    |
| 6  | Confidentiality          | <a href="#">#27</a>  | How personal information about potential and enrolled                | 23 |
| 7  |                          |                      | participants will be collected, shared, and maintained in order to   |    |
| 8  |                          |                      | protect confidentiality before, during, and after the trial          |    |
| 9  |                          |                      |                                                                      |    |
| 10 |                          |                      |                                                                      |    |
| 11 | Declaration of interests | <a href="#">#28</a>  | Financial and other competing interests for principal investigators  | 23 |
| 12 |                          |                      | for the overall trial and each study site                            |    |
| 13 |                          |                      |                                                                      |    |
| 14 |                          |                      |                                                                      |    |
| 15 | Data access              | <a href="#">#29</a>  | Statement of who will have access to the final trial dataset, and    | 22 |
| 16 |                          |                      | disclosure of contractual agreements that limit such access for      |    |
| 17 |                          |                      | investigators                                                        |    |
| 18 |                          |                      |                                                                      |    |
| 19 |                          |                      |                                                                      |    |
| 20 | Ancillary and post trial | <a href="#">#30</a>  | Provisions, if any, for ancillary and post-trial care, and for       | 16 |
| 21 | care                     |                      | compensation to those who suffer harm from trial participation       |    |
| 22 |                          |                      |                                                                      |    |
| 23 |                          |                      |                                                                      |    |
| 24 | Dissemination policy:    | <a href="#">#31a</a> | Plans for investigators and sponsor to communicate trial results     | 19 |
| 25 | trial results            |                      | to participants, healthcare professionals, the public, and other     |    |
| 26 |                          |                      | relevant groups (eg, via publication, reporting in results           |    |
| 27 |                          |                      | databases, or other data sharing arrangements), including any        |    |
| 28 |                          |                      | publication restrictions                                             |    |
| 29 |                          |                      |                                                                      |    |
| 30 |                          |                      |                                                                      |    |
| 31 |                          |                      |                                                                      |    |
| 32 |                          |                      |                                                                      |    |
| 33 | Dissemination policy:    | <a href="#">#31b</a> | Authorship eligibility guidelines and any intended use of            | NA |
| 34 | authorship               |                      | professional writers                                                 |    |
| 35 |                          |                      |                                                                      |    |
| 36 |                          |                      |                                                                      |    |
| 37 | Dissemination policy:    | <a href="#">#31c</a> | Plans, if any, for granting public access to the full protocol,      | NA |
| 38 | reproducible research    |                      | participant-level dataset, and statistical code                      |    |
| 39 |                          |                      |                                                                      |    |
| 40 |                          |                      |                                                                      |    |
| 41 | <b>Appendices</b>        |                      |                                                                      |    |
| 42 |                          |                      |                                                                      |    |
| 43 | Informed consent         | <a href="#">#32</a>  | Model consent form and other related documentation given to          | 7  |
| 44 | materials                |                      | participants and authorised surrogates                               |    |
| 45 |                          |                      |                                                                      |    |
| 46 |                          |                      |                                                                      |    |
| 47 | Biological specimens     | <a href="#">#33</a>  | Plans for collection, laboratory evaluation, and storage of          | NA |
| 48 |                          |                      | biological specimens for genetic or molecular analysis in the        |    |
| 49 |                          |                      | current trial and for future use in ancillary studies, if applicable |    |
| 50 |                          |                      |                                                                      |    |
| 51 |                          |                      |                                                                      |    |

None The SPIRIT Explanation and Elaboration paper is distributed under the terms of the Creative Commons Attribution License CC-BY-NC. This checklist can be completed online using <https://www.goodreports.org/>, a tool made by the [EQUATOR Network](#) in collaboration with [Penelope.ai](#)

# BMJ Open

## Evaluating the efficacy and safety of transdermal electrical stimulation on the visual functions of patients with retinitis pigmentosa: a clinical trial protocol for a prospective, multi-center, randomized, double-masked, and sham-controlled design (ePICO trial)

|                                 |                                                                                                                                                                                                                                                                                                                                                                                                                                                                                                                                                                                                                                                                                                                                                                                                                                                     |
|---------------------------------|-----------------------------------------------------------------------------------------------------------------------------------------------------------------------------------------------------------------------------------------------------------------------------------------------------------------------------------------------------------------------------------------------------------------------------------------------------------------------------------------------------------------------------------------------------------------------------------------------------------------------------------------------------------------------------------------------------------------------------------------------------------------------------------------------------------------------------------------------------|
| Journal:                        | <i>BMJ Open</i>                                                                                                                                                                                                                                                                                                                                                                                                                                                                                                                                                                                                                                                                                                                                                                                                                                     |
| Manuscript ID                   | bmjopen-2021-057193.R2                                                                                                                                                                                                                                                                                                                                                                                                                                                                                                                                                                                                                                                                                                                                                                                                                              |
| Article Type:                   | Protocol                                                                                                                                                                                                                                                                                                                                                                                                                                                                                                                                                                                                                                                                                                                                                                                                                                            |
| Date Submitted by the Author:   | 06-Apr-2022                                                                                                                                                                                                                                                                                                                                                                                                                                                                                                                                                                                                                                                                                                                                                                                                                                         |
| Complete List of Authors:       | Miura, Gen ; Chiba University Graduate School of Medicine School of Medicine, Department of Ophthalmology and Visual Science<br>Ozawa, Yoshihito; Chiba University Hospital, Clinical Research Center<br>Shiko, Yuki; Chiba University Hospital, Clinical Research Center<br>Kawasaki, Yohei; Chiba University Hospital, Clinical Research Center<br>Iwase, Takayuki; Chiba University Hospital, Clinical Research Center<br>Fujiwara, Tadami; Chiba University Hospital, Clinical Research Center<br>Baba, Takayuki; Chiba University Graduate School of Medicine School of Medicine, Department of Ophthalmology and Visual Science<br>Hanaoka, Hideki; Chiba University Hospital, Clinical Research Center<br>Yamamoto, Shuichi; Chiba University Graduate School of Medicine School of Medicine, Department of Ophthalmology and Visual Science |
| <b>Primary Subject Heading</b>: | Ophthalmology                                                                                                                                                                                                                                                                                                                                                                                                                                                                                                                                                                                                                                                                                                                                                                                                                                       |
| Secondary Subject Heading:      | Research methods                                                                                                                                                                                                                                                                                                                                                                                                                                                                                                                                                                                                                                                                                                                                                                                                                                    |
| Keywords:                       | Vitreoretinal < OPHTHALMOLOGY, Medical ophthalmology < OPHTHALMOLOGY, Neuro-ophthalmology < OPHTHALMOLOGY                                                                                                                                                                                                                                                                                                                                                                                                                                                                                                                                                                                                                                                                                                                                           |
|                                 |                                                                                                                                                                                                                                                                                                                                                                                                                                                                                                                                                                                                                                                                                                                                                                                                                                                     |

SCHOLARONE™  
Manuscripts

1  
2  
3  
4 1 **Evaluating the efficacy and safety of transdermal electrical stimulation on the**  
5  
6  
7 2 **visual functions of patients with retinitis pigmentosa: a clinical trial protocol**  
8  
9  
10 3 **for a prospective, multi-center, randomized, double-masked, and sham-**  
11  
12  
13 4 **controlled design (ePICO trial)**  
14  
15  
16 5  
17  
18  
19 6  
20  
21

22 7 Gen Miura<sup>1\*</sup>, Yoshihito Ozawa<sup>2</sup>, Yuki Shiko<sup>2</sup>, Yohei Kawasaki<sup>2</sup>, Takayuki Iwase<sup>2</sup>,  
23  
24  
25 8 Tadami Fujiwara<sup>2</sup>, Takayuki Baba<sup>1</sup>, Hideki Hanaoka<sup>2</sup>, Shuichi Yamamoto<sup>1</sup>  
26  
27

28 9 <sup>1</sup>Department of Ophthalmology and Visual Science, Chiba University Graduate  
29  
30  
31 10 School of Medicine, Chiba, Japan,  
32  
33

34 11 <sup>2</sup>Clinical Research Center, Chiba University Hospital, Chiba, Japan.  
35  
36

37 12 Correspondence: Gen Miura, MD, PhD  
38  
39

40 13 Department of Ophthalmology and Visual Science, Chiba University Graduate  
41  
42

43 14 School of Medicine, Inohana 1-8-1, Chuo-ku, Chiba 260-8670, Japan;  
44  
45

46 15 Tel/Fax: 81-43-226-2124/81-43-224-4162  
47  
48

49 16 E-mail: gmiura2@chiba-u.jp  
50  
51  
52  
53  
54  
55  
56  
57  
58  
59  
60

1  
2  
3  
4 18 **ABSTRACT**

5  
6  
7 19 **Introduction:** Previously, we conducted a clinical trial to evaluate the safety and  
8  
9  
10 20 efficacy of transdermal electrical stimulation (TdES) with skin electrodes to improve  
11  
12  
13 21 the visual functions in patients with retinitis pigmentosa (RP). No adverse events  
14  
15  
16 22 were related to the treatment during follow-up examinations, and TdES significantly  
17  
18  
19 23 improved the mean visual acuity and visual field sensitivity.

20  
21  
22 24 **Methods and analysis:** We developed a study protocol for a prospective, multi-  
23  
24  
25 25 center, randomized, double-masked, and sham-controlled clinical trial, planned to  
26  
27  
28 26 commence on June 2021. We intend to compare the maintenance or improvement in  
29  
30  
31 27 best corrected visual acuity, and safety of TdES using skin electrodes between  
32  
33  
34 28 patients with RP and the sham group. The primary endpoint comprises the  
35  
36  
37 29 superiority of the logarithm of the minimum angle of resolution (logMAR) visual acuity  
38  
39  
40 30 change at week 24 from baseline in the treatment and sham groups. Secondary  
41  
42  
43 31 endpoints involve the comparison of the treatment and sham groups at week 24 for  
44  
45  
46 32 the logMAR visual acuity, early treatment diabetic retinopathy study visual acuity, the  
47  
48  
49 33 mean deviation value of Humphrey field analyzer 10-2, monocular Humphrey  
50  
51  
52 34 Esterman visual field test score, ellipsoid zone length, central foveal thickness, and  
53  
54  
55 35 25-item National Eye Institute Visual Function Questionnaire score. We intend to  
56  
57  
58 36 enroll 50 patients from three Japanese institutions within 1 year and follow them up  
59  
60



1  
2  
3  
4 37 for 1 years.  
5  
6

7 38 **Ethics and dissemination:** The protocol was approved by the institutional review  
8  
9  
10 39 board at the Chiba University Hospital and two other institutions, and was registered  
11  
12  
13 40 with the Japan Registry of Clinical Trials on May 17, 2021. The trial will be conducted  
14  
15  
16 41 in accordance with the principles of the Declaration of Helsinki, and is in accordance  
17  
18  
19 42 with Good Clinical Practice standards. The findings will be published in a peer-  
20  
21  
22 43 reviewed journal.  
23  
24

25 44 **Trial registration number**

26  
27  
28 45 Japan Registry of Clinical Trials (JRCT2032210094).  
29  
30  
31  
32  
33  
34  
35  
36  
37  
38  
39  
40  
41  
42  
43  
44  
45  
46  
47  
48  
49  
50  
51  
52  
53  
54  
55  
56  
57  
58  
59  
60

## 46 **Strengths and limitations of this study**

- 47 ● This is the first multi-center, randomized, sham-controlled, and double-masked  
48 trial aimed at verifying the maintenance or improvement in best corrected visual  
49 acuity, and safety of TdES using skin electrodes in patients with retinitis  
50 pigmentosa (RP).
- 51 ● We intend to use a less invasive and easily applicable electrical stimulator with  
52 skin electrodes, and no serious adverse events were observed in our previous  
53 study using this device.
- 54 ● A multi-center (three university hospitals), double-masked, sham-controlled, and  
55 randomized controlled trial is the optimal study design for verifying the  
56 effectiveness of TdES.
- 57 ● Despite fewer patients owing to the rare occurrence of RP, the necessary  
58 sample size is estimated to comprise 50 patients based on previous study data.  
59 Second limitation is that the ideal regimen of electrical stimulation is not yet  
60 known.

61

## 62 INTRODUCTION

63 Spontaneous afferent electrical activity reportedly regulates target cell death  
64 in the developing rat visual system.<sup>1</sup> Short periods of low-frequency electrical  
65 stimulation accelerate the axonal regeneration of peripheral neurons.<sup>2</sup> Morimoto et  
66 al. reported on significantly higher survival rate of rat retinal ganglion cells (RGCs)  
67 following optic nerve transection in rats whose optic nerves were electrically  
68 stimulated than those of the untreated group.<sup>3</sup> Moreover, electrical stimulation  
69 exerted a neuroprotective effect on RGCs, followed by the development of a  
70 transcorneal electrical stimulation (TcES) device that could be used in humans.<sup>4</sup>  
71 Animal models of retinitis pigmentosa (RP), including rats and rabbits,<sup>5-7</sup> and clinical  
72 studies on patients with RP mentioned that TcES can protect retinal photoreceptors.  
73 Moreover, TcES improves the visual acuity, visual fields, and electroretinograms.<sup>8,9</sup>  
74 Therefore, recommendation is proposed for TcES use in the treatment of retinitis  
75 pigmentosa, especially in Europe.<sup>10</sup> Previous TcES studies used the contact lens  
76 type or Dawson–Trick–Litzkow fiber-type corneal electrodes, and reported on an  
77 association between TcES sessions and dry eye symptoms.<sup>11</sup> As another attempt to  
78 establish electrical stimulation as a treatment for RP, Jackson et al reported about  
79 the safety and efficacy of intravitreal quantum dots for retinitis pigmentosa and  
80 showed that no adverse reactions were attributed to the quantum dots, and the

1  
2  
3  
4 81 average vision of treated eyes improved.<sup>12</sup>  
5  
6

7 82 Based on this information, we previously conducted a prospective, non-  
8  
9  
10 83 randomized, open-label, uncontrolled clinical trial with 20 eyes of 10 RP patients to  
11  
12  
13 84 evaluate the safety and efficacy of transdermal electrical stimulation (TdES) on the  
14  
15  
16 85 visual function. That was a 12 weeks trial consisting of 6 TdES treatments every 2  
17  
18  
19 86 weeks.<sup>13</sup> We used a prototype equipment with a patch containing an electrode  
20  
21  
22 87 applied to the skin. Electric stimulation was delivered through the skin, developed  
23  
24  
25 88 jointly with the Mayo Co., Ltd. No adverse events were reported during the follow-up  
26  
27  
28 89 examinations, and the mean logarithm of the minimum angle of resolution (logMAR),  
29  
30  
31 90 Early Treatment Diabetic Retinopathy Study (ETDRS) visual acuity, and the mean  
32  
33  
34 91 deviation of the Humphrey field analyzer (HFA) 10-2 significantly improved post-  
35  
36  
37 92 TdES. Therefore, we planned a prospective, multi-center, randomized, double-  
38  
39  
40 93 masked, and sham-controlled clinical trial to compare the maintenance or  
41  
42  
43 94 improvement in best corrected visual acuity (BCVA), and safety of TdES using skin  
44  
45  
46 95 electrodes between patients with RP and the sham group. The trial protocol was  
47  
48  
49 96 approved in May 2021 by the Pharmaceuticals and Medical Devices Agency  
50  
51  
52 97 (PMDA), Japan, and the trial was initiated in June 2021. Approval was obtained from  
53  
54  
55 98 the institutional review board (IRB) prior to patient recruitment at each institution.  
56  
57

58 99  
59  
60

## 100 **METHODS AND ANALYSIS**

### 101 **Objectives**

102 We aimed to verify the long-term efficacy and safety of transdermal electrical  
103 stimulation with a skin electrode as a novel treatment for patients with RP.

104 Furthermore, we intended to investigate the long-term course and safety following  
105 the discontinuation of TdES.

### 106 **Trial design**

107 We proposed a prospective, multi-center, randomized, double-masked, and  
108 sham-controlled clinical trial. The original protocol and informed consent forms  
109 written in Japanese are provided in the online supplementary appendices 1 and 2,  
110 and this protocol meets the criteria of the Standard Protocol Items:

111 Recommendations for Interventional Trials 2013 statement. The trial was conceived  
112 and initiated at the Chiba University Hospital and will be conducted across three  
113 institutions (Chiba University Hospital, Kobe University Hospital, and Nagoya City  
114 University Hospital) in Japan. Patients were randomly assigned to receive either  
115 TdES (intervention) or sham (control), immediately before treatment (details below).

116 Figure 1 illustrates the study design. This study consists of three periods,  
117 namely pre-observation, treatment, and post-observation. After obtaining informed  
118 consent, patients were randomly assigned 1: 1 to the TdES and sham groups. The

1  
2  
3  
4 119 permissible range for the pre-observation period is 4 weeks. TdES will be performed  
5  
6  
7 120 12 times. The primary and secondary endpoints will be evaluated at week 24. In  
8  
9  
10 121 contrast, the exploratory endpoints will be evaluated at weeks 36 and 48. Table 1  
11  
12  
13 122 lists all schedules for each period to be performed in this study.  
14  
15  
16 123

For peer review only



1  
2  
3  
4 126 **Abbreviations:** TdES, transdermal electrical stimulation; VA, visual acuity; ETDRS,  
5  
6  
7 127 Early Treatment Diabetic Retinopathy Study; HFA, Humphrey field analyzer; OCT,  
8  
9  
10 128 optical coherence tomography; NEI VFQ-25, 25-item National Eye Institute Visual  
11  
12  
13 129 Function Questionnaire; IOP: intraocular pressure; and fds: fundus examination.

14  
15  
16 130 Black circles are items that must be performed. White circles are items to be performed  
17  
18  
19 131 only when the investigator deems it necessary.  
20  
21

22 132

23  
24  
25 133 In this trial, FUJITSU Life Science Solution tsClinical DDworks NX, which is a clinical  
26  
27  
28 134 trial work support system is used for communicating important protocol modifications  
29  
30  
31 135 to relevant parties.  
32

33  
34 136

### 35 36 37 137 **Primary endpoint**

38  
39  
40 138 The primary endpoint comprises the superiority of the logMAR visual acuity  
41  
42  
43 139 in the change from baseline at week 24 in the TdES group, compared to the sham  
44  
45  
46 140 group.  
47

### 48 49 141 **Secondary endpoints**

50  
51  
52 142 The secondary endpoints include a comparison of the TdES and sham  
53  
54  
55 143 groups at baseline to week 24 for the logMAR visual acuity, ETDRS visual acuity, the  
56  
57  
58 144 mean deviation (MD) value of HFA 10-2 (dB), monocular Humphrey Esterman visual  
59



1  
2  
3  
4 145 field test score, ellipsoid zone length ( $\mu\text{m}$ ), central foveal thickness ( $\mu\text{m}$ ), and compo  
5  
6  
7 146 9 score of the 25-item National Eye Institute Visual Function Questionnaire (NEI  
8  
9  
10 147 VFQ-25) (details below).

### 13 148 **Exploratory endpoints**

16 149 The exploratory endpoints comprised a comparison of the TdES and sham  
17  
18  
19 150 groups at weeks 36 and 48 for items of the secondary endpoints.

### 22 151 **Safety endpoints**

25 152 We intend to evaluate the number and rate of adverse events while  
26  
27  
28 153 analyzing the safety endpoints. In addition to the evaluation of possible keratitis,  
29  
30  
31 154 dermatitis, anterior segment, optic media, and fundus, we will determine the effects  
32  
33  
34 155 on the facial and trigeminal nerves during the scheduled visit. Moreover, the patients  
35  
36  
37 156 will undergo safety assessment by optical coherence tomography (OCT). All adverse  
38  
39  
40 157 events are coded in MedDRA (vas.6.0) and recorded.

### 43 158 **Outcome measures**

46 159 The BCVA was measured monocularly using a Japanese standard Landolt  
47  
48  
49 160 ring chart (System Charts SC-2000 Nidek Instruments, Gamagori, Japan) at 3 m.  
50  
51  
52 161 Decimal visual acuities were converted to logMAR units using the formula  $\text{logMAR} =$   
53  
54  
55 162  $-\log(\text{decimal acuity})^{14}$  for statistical analyses. Furthermore, we assessed the BCVA  
56  
57  
58 163 using the ETDRS chart (CSV-1000LanC VectorVision, Ohio, USA) at a distance of

1  
2  
3  
4 164 2.5 m. The luminance for the tests was 85 cd/m<sup>2</sup>, which is recommended for vision  
5  
6  
7 165 testing by the US National Academy of Sciences. It has been adopted by the FDA as  
8  
9  
10 166 the required testing light level for clinical trials. Refraction measurement was done  
11  
12  
13 167 every time visual acuity measurements.

16 168 The MD of retinal sensitivity was determined by the HFA III (Model 850; Carl  
17  
18  
19 169 Zeiss Meditec, Inc., Dublin, CA, USA) using the Swedish Interactive Threshold  
20  
21  
22 170 Algorithm Standard 10-2 protocol. We also analyzed monocular Humphrey Esterman  
23  
24  
25 171 visual field test scores. Visual acuity, visual field, and OCT tests were all performed  
26  
27  
28 172 by a certified orthoptist. We requested the patients to respond to the Japanese  
29  
30  
31 173 version of the NEI VFQ-25<sup>15</sup> to evaluate their subjective symptoms and the quality of  
32  
33  
34 174 life. The NEI VFQ-25 consists of 25 questions that address 12 aspects of daily living  
35  
36  
37 175 as follows: general health, general vision, near vision, distance vision, driving,  
38  
39  
40 176 peripheral vision, color vision, ocular pain, role limitation, dependency, social  
41  
42  
43 177 function, and mental health. Compo 9 comprehensively evaluates nine aspects  
44  
45  
46 178 (general vision, near vision, distance vision, peripheral vision, color vision, role  
47  
48  
49 179 limitation, dependency, social function, and mental health), and was analyzed in this  
50  
51  
52 180 study. VFQ-25 is self-administered and was answered by the patients themselves.  
53  
54  
55 181 The primary outcome was the only protected comparison in this trial.

## 182 **Eligibility criteria**

1  
2  
3  
4 183 Those who met all of the following inclusion criteria and did not have any  
5  
6  
7 184 listed exclusion criteria were considered eligible:  
8  
9

10 185

11  
12  
13 186 **Inclusion criteria**

- 14  
15  
16 187 1. Clinically diagnosed with typical RP, with age  $\geq 20$  years and  $\leq 80$  years.  
17  
18  
19 188 2. HFA 10-2 performed twice within 6 months with a reliability fixation defect rate  
20  
21  
22 189  $< 20\%$ , false positive rate  $< 15\%$ , false negative rate  $< 33\%$ , and a difference in the  
23  
24  
25 190 mean center four points of retinal sensitivity within 5 dB; both values were  $< 30$  dB.  
26  
27  
28 191 3. Decimal visual acuity ranging from 0.1 to 0.7 during screening.  
29  
30  
31 192 4. HFA 10-2 MD values up to -10 dB.  
32  
33  
34 193 5. Provided written informed consent with a sufficient understanding of the  
35  
36  
37 194 responsibilities of participating in this trial.  
38  
39  
40 195 6. Regular hospital visits every 2 weeks for 6 months and follow-up at 36 and 48  
41  
42  
43 196 weeks.  
44  
45  
46 197 7. Could adopt appropriate contraceptive measures during the trial period.  
47  
48

49 198

50  
51  
52 199 **Exclusion criteria**

- 53  
54  
55 200 1. Patients with a history of electrical stimulation treatment for ocular diseases.  
56  
57  
58 201 2. Underwent intraocular surgery within 3 months of beginning this trial.  
59  
60

- 1  
2  
3  
4 202 3. Modified the dose and usage of isopropyl unoprostone,<sup>16</sup> calcium antagonist, and  
5  
6  
7 203 helenien within 31 days before the screening examination.  
8  
9  
10 204 4. A history of allergy to mydriatic agents and ophthalmic surface anesthetic.  
11  
12  
13 205 5. The presence of ocular diseases, such as vitreous macular traction syndrome,  
14  
15  
16 206 macular edema, epiretinal membrane, myopia with posterior staphyloma, diabetic  
17  
18  
19 207 retinopathy, the inflammation or infection of accessory visual structures, severe dry  
20  
21  
22 208 eye, central retinal vein occlusion, ischemic optic neuropathy, optic nerve disease,  
23  
24  
25 209 Emery-Little cataract  $\geq$  grade 3<sup>17</sup>, or posterior capsular opacification.  
26  
27  
28 210 6. Without any deterioration in visual acuity, OCT findings, Goldmann perimetry  
29  
30  
31 211 findings, and HFA 10-2 visual field sensitivities in last 3 years.  
32  
33  
34 212 7. With a pacemaker or defibrillator.  
35  
36  
37 213 8. With a history of malignant tumor. However, patients without a relapse for more  
38  
39  
40 214 than 5 years can be enrolled.  
41  
42  
43 215 9. With psychosis, dementia, or mental symptoms that could hinder participation.  
44  
45  
46 216 10. With diabetes and poor glycemic control (HbA1c >10.0%)  
47  
48  
49 217 11. With hypertension (systole  $\geq$ 180 mmHg and/or diastole  $\geq$ 110 mmHg) and  
50  
51  
52 218 difficulty in controlling blood pressure by treatment.  
53  
54  
55 219 12. With hepatic or renal dysfunction that meets any of the following criteria during  
56  
57  
58 220 screening: (i) AST, ALT: More than thrice the upper limit of the facility's standard  
59  
60

1  
2  
3  
4 221 value; (ii) Creatinine: More than 1.5 times the upper limit of the facility's standard

5  
6  
7 222 value.

8  
9  
10 223 13. Pregnant, breastfeeding, or planning to get pregnant during the trial period.

11  
12  
13 224 14. Participating in other clinical trials.

14  
15  
16 225 15. Under investigational responsibility (shared) judged inappropriate by doctors for

17  
18  
19 226 participation in this trial.

20  
21  
22 227

23  
24  
25 228 **Registration and randomization**

26  
27  
28 229 After confirming the fulfillment of the eligibility criteria, patients were

29  
30  
31 230 randomly assigned to the TdES and sham groups in a 1:1 allocation via a dynamic

32  
33  
34 231 and centralized randomization procedure, implemented with the DATATRAK

35  
36  
37 232 Electronic Data Capture system (DATATRAK ONE V.14.6.3; <https://>

38  
39  
40 233 [secure.datatrak.net](https://secure.datatrak.net)). The participants were randomized by the Academic Clinical

41  
42  
43 234 Research Center of Osaka University Hospital as a neutral third party, and the

44  
45  
46 235 masking codes will be retained by the Osaka University, thus effectively

47  
48  
49 236 guaranteeing the implementation of masking in clinical trials. An electronic data

50  
51  
52 237 capture system was used for the registration, randomization, and data collection.

53  
54  
55 238 The registration and allocation sequences were generated and managed by the

56  
57  
58 239 Academic Clinical Research Center of Osaka University Hospital. Viedoc's dynamic

1  
2  
3  
4 240 allocation incorporates the Pocock-Simon method, which aims to minimize  
5  
6  
7 241 imbalances in the distribution of patients across treatment groups with respect to  
8  
9  
10 242 prognostic factors that may affect the effect of treatment on patients. This is done by  
11  
12  
13 243 hypothetically assigning a new patient to each treatment group and calculating the  
14  
15  
16 244 level of imbalance for each assignment. Patients are then assigned to treatment  
17  
18  
19 245 groups in such a way that imbalance is minimized. when setting up allocations for  
20  
21  
22 246 the Pocock-Simon method, we set the relative importance of factors and the desired  
23  
24  
25 247 distribution of treatments to be assigned.

26  
27  
28 248 Data collection was managed by the Data Management Office, Clinical Trial  
29  
30  
31 249 Centre of the Chiba University Hospital. The allocation factor is the BCVA (>0.3,  
32  
33  
34 250 <0.4), based on dynamic allocation method.

35  
36  
37 251 Operators are divided into masked group and unmasked group. The  
38  
39  
40 252 unmasked operator only operates the device to treat the TdES and sham treatment  
41  
42  
43 253 groups. The masked operator performs examinations, safety assessment,  
44  
45  
46 254 confirmation of results during trial period. After the trial is completed, they become  
47  
48  
49 255 unmask and perform evaluation of results. Participants are masked, in which they  
50  
51  
52 256 are not known which group they are in. The Statistician accesses and analyzes the  
53  
54  
55 257 data after the test is completed.

56  
57  
58 258

## 259 **Treatment methods**

260 TdES group: The patients received TdES every 2 weeks for 12 sessions.

261 They underwent TdES consisting of 10-ms biphasic pulses at 20 Hz for 30 min. All

262 patients were simultaneously stimulated bilaterally with 1.0 mA at the Chiba

263 University Hospital by physicians. Electrical pulses were obtained from a prototype

264 equipment (Figure 2) jointly developed by Mayo Co., Ltd. (Aichi, Japan). While one

265 electrode was placed on the lower eyelid lateral to the midline of both eyes, the other

266 was placed at the center of the forehead in a similar way as in our previous study.<sup>13</sup>

267 Sham treatment group: The electrodes were attached in place similar to the

268 TdES group. A normally energized electric cord is used for the treatment group, and

269 a broken electric cord is used for the sham group, but the difference was not

270 apparent to the patient. The display of the treatment device used in the sham group

271 was also displayed as 1000  $\mu\text{V}$ , which is exactly the same as in the treatment group,

272 but the amount of current actually energized was 0  $\mu\text{A}$ . When the unmasked

273 operator pressed the start button, 30-minute timer would automatically start, and

274 after 30 minutes it would automatically end, just like in the treatment group.

275 Therefore, the sham treatment was administered at same interval as the live

276 treatment in Treatment method part. This was exactly the same process for both

277 groups. Participants were only patients who have never experienced electrical

1  
2  
3  
4 278 stimulation therapy. The setting, the display of the device, and the treatment time  
5  
6  
7 279 were exactly the same as in the treatment group, and the only difference was that no  
8  
9  
10 280 current flows, so the effect of masking was maintained in this way.  
11  
12

13 281 The procedure manual for the provision and management of investigational  
14  
15  
16 282 equipment written in Japanese is provided in the online supplementary appendix 3.  
17  
18

### 19 283 **Post-observation period**

20  
21  
22 284 Following TdES, all patients entered the post-observation period. They will  
23  
24  
25 285 be admitted at 36 and 48 weeks and evaluated for the applicable items and safety  
26  
27  
28 286 (Table 1).  
29  
30

### 31 287 **Criteria for the discontinuation of trial treatment**

32  
33  
34 288 The defined criteria for the discontinuation of trial treatment are as follows:  
35  
36

- 37 289 1) Offer to decline participation in the clinical trial or consent withdrawal.
- 38  
39  
40 290 2) Found ineligible after enrollment.
- 41  
42  
43 291 3) Difficult to continue the clinical trial because of an exacerbation of complications.
- 44  
45  
46 292 4) Difficult to continue the clinical trial owing to adverse events.
- 47  
48  
49 293 5) Pregnancy.
- 50  
51  
52 294 6) If the entire clinical trial is discontinued.
- 53  
54  
55 295 7) Other serious violations of the trial protocol.
- 56  
57  
58 296 8) Other situations, judged by the PI, in which TdES cannot be continued.  
59  
60



1  
2  
3  
4 297 **Data management, monitoring, safety, and auditing**

5  
6  
7 298 The monitors will ensure the following aspects:

8  
9  
10 299 # The investigational team complied with the study protocol based on Good Clinical  
11  
12  
13 300 Practice (GCP) standards.

14  
15  
16 301 # The data, results, and adverse events (AEs) have been appropriately and  
17  
18  
19 302 accurately recorded in the electronic case report forms.

20  
21  
22 303 # Serious AEs are reported to the trial coordinator and the treatment device provider  
23  
24  
25 304 (Mayo Co., Ltd), and patients meeting the aforementioned criteria have been  
26  
27  
28 305 reported to the IRB.

29  
30  
31 306 The classification of AEs is determined according to the Medical Dictionary  
32  
33  
34 307 for Regulatory Activities, Japanese translation MedDRA/J V.22.1 (MedDRA  
35  
36  
37 308 Japanese Maintenance Organization, Tokyo, Japan). All participants with AEs were  
38  
39  
40 309 followed up until they resolved the AE or for 4 weeks after the end of the trial. All  
41  
42  
43 310 serious AEs were reported to the investigators, discussed through an AE reporting  
44  
45  
46 311 system on the web, and reported to the Pharmaceuticals and Medical Devices  
47  
48  
49 312 Agency (PMDA) (as required). All patients will be recruited into a clinical trial  
50  
51  
52 313 insurance provided by the Mitsui Sumitomo Insurance Co., Ltd. for a compensation  
53  
54  
55 314 to those who suffer harm from trial participation.

56  
57  
58 315 **Data monitoring committee**

1  
2  
3  
4 316 The data monitoring committee comprises three clinical trial specialists,  
5  
6  
7 317 including a biostatistician, an ophthalmology specialist, and an otolaryngology  
8  
9  
10 318 specialist who were not included in this study. These data monitoring committee  
11  
12  
13 319 members were all independent. This committee will meet twice a year and will check  
14  
15  
16 320 all data obtained from this trial.

### 19 321 **Statistical analysis plan**

22 322 We will perform statistical analyses and reporting of this trial in accordance  
23  
24  
25 323 with the Consolidated Standards of Reporting Trials statement guidelines. All  
26  
27  
28 324 efficacy analyses will be primarily based on the complete analysis set, including all  
29  
30  
31 325 patients who received at least one stimulation of the trial treatment. For the primary  
32  
33  
34 326 analysis aimed at comparing the effects, we will estimate a change in logMAR from  
35  
36  
37 327 the baseline to 24 weeks and its 95% CI using the analysis of covariance, adjusted  
38  
39  
40 328 for the allocation factor at the registration period.

43 329 To supplement the analysis of the primary endpoints, we will analyze the  
44  
45  
46 330 secondary endpoints of the efficacy. There are no multiplicity adjustments in the  
47  
48  
49 331 analysis of the secondary endpoints. In a secondary analysis, we will use the linear  
50  
51  
52 332 mixed-effects model to compare the secondary efficacy of the change score between  
53  
54  
55 333 groups at each time point. The frequency of AEs and 95% CI were estimated using  
56  
57  
58 334 the Clopper-Pearson exact confidence interval. All comparisons were planned, and

1  
2  
3  
4 335 all p-values were two-sided. The statistical significance has been set at  $P < 0.05$ . All

5  
6  
7 336 statistical analyses will be performed using SAS software (version 9.4; SAS, Cary,

8  
9  
10 337 North Carolina, USA).

### 11 12 13 338 **Missing values**

14  
15  
16 339 In principle, the missing values are not supplemented. Upon supplementing

17  
18  
19 340 as necessary, we made the following considerations:

20  
21  
22 341 Consider conducting an analysis using a mixed-effects model repeated

23  
24  
25 342 measures for missing values because of discontinuation or the omission of efficacy

26  
27  
28 343 evaluation items.

29  
30  
31 344 In the sensitivity analysis, the stability of the result was confirmed by analyzing

32  
33  
34 345 the observing case (OC), last observation carried forward (LOCF), and multiple

35  
36  
37 346 imputation (MI). However, the Markov chain Monte Carlo method was used in the MI

38  
39  
40 347 analysis, and the number of utterances was set to 100. The supplementary method

41  
42  
43 348 and the results of the sensitivity analysis are reported in the analysis report.

### 44 45 46 349 **Sample size estimation**

47  
48  
49 350 The primary objective of the present study was to compare the change in

50  
51  
52 351 logMAR visual acuity between the treatment and sham groups from week 0 to week

53  
54  
55 352 24. The null hypothesis was that there would be no significant between-group

56  
57  
58 353 differences in the change in logMAR visual acuity. The results of our previous study

1  
2  
3  
4 354 (Study No. K29001) demonstrated an improvement in the logMAR visual acuity.  
5  
6

7 355 Therefore, we assume the mean and standard deviation of the 24-week change from  
8  
9

10 356 baseline to be 0.1 logMAR and 0.124 logMAR visual acuity, respectively. In contrast,  
11  
12

13 357 the placebo effect of the sham group was 1.6 characters (0.032 logMAR visual  
14  
15

16 358 acuity), as reported in a 2-year-long clinical trial of neovascular age-related macular  
17  
18

19 359 degeneration.<sup>18</sup> The placebo effect of the sham group was presumably linear with  
20  
21

22 360 time, and that during evaluation (week 24) of the primary endpoint was assumed to  
23  
24

25 361 be -0.008 logMAR visual acuity. Therefore, the difference in the TdES and sham  
26  
27

28 362 groups from the baseline was 0.1 log MAR and -0.008 log MAR, respectively.  
29  
30

31 363 Moreover, the common standard deviation of the groups was 0.124 log MAR.  
32  
33

34 364 Therefore, we calculated the sample size according to the expected change in the  
35  
36

37 365 logMAR visual acuity from week 0 to week 24 in the treatment and sham groups (0.1  
38  
39

40 366 and -0.008, respectively) (SD=0.124). Based on these assumptions, the required  
41  
42

43 367 sample size was 22 patients per group (2-sided,  $\alpha=.05$ ,  $\beta=.8$ , t-test). Considering a  
44  
45

46 368 10% dropout rate, we targeted 25 patients per group. Therefore, the target sample  
47  
48

49 369 size for the randomized trial was 50.  
50  
51

## 52 370 **Interim analysis and monitoring**

  
53

54  
55 371 No interim analysis has been planned.  
56  
57

## 58 372 **Patient and public involvement**

  
59  
60

1  
2  
3  
4 373 The patients and general public were not involved in the trial design.  
5  
6

7 374 **ETHICS AND DISSEMINATION**  
8  
9

10 375 The protocol was approved by the institutional review board at the Chiba  
11  
12  
13 376 University Hospital and two other institutions, and was registered with the Japan  
14  
15  
16 377 Registry of Clinical Trials on May 17, 2021. The trial will be conducted in accordance  
17  
18  
19 378 with the principles of the Declaration of Helsinki, and is in accordance with Good  
20  
21  
22 379 Clinical Practice standards. We intend to publish results of this ePICO trial in a major  
23  
24  
25 380 journal.  
26  
27

28 381

30  
31 382 **DISCUSSION**  
32  
33

34 383 Previous studies have reported on improved visual function of eyes with  
35  
36  
37 384 traumatic and ischemic optic neuropathy,<sup>19</sup> retinal artery occlusion,<sup>20 21</sup> dry age-  
38  
39  
40 385 related macular dystrophy,<sup>22 23</sup> glaucoma,<sup>24</sup> Leber hereditary optic neuropathy<sup>25</sup>, and  
41  
42  
43 386 RP following TdES with corneal electrodes.  
44  
45

46 387 The previously conducted clinical trial demonstrated no adverse events  
47  
48  
49 388 caused by electrical stimulation. In addition, the mean BCVA and MD of HFA 10-2  
50  
51  
52 389 significantly improved after TdES. Currently, there are no approved electrical  
53  
54  
55 390 stimulation devices for ocular diseases in Japan. We planned this trial to approve  
56  
57  
58 391 ocular electrical stimulation therapy devices for patients with RP.  
59  
60

1  
2  
3  
4 392 The electrodes of the treatment device used in this trial do not touch the  
5  
6  
7 393 corneal or conjunctival surface, thus preventing dry eye symptoms previously  
8  
9  
10 394 reported using transcorneal electrodes.<sup>11</sup> Moreover, no serious adverse events were  
11  
12  
13 395 observed in the previous pilot study.<sup>13</sup> Therefore, our treatment device using skin  
14  
15  
16 396 electrodes has the advantage of being an easier and safer option than one that uses  
17  
18  
19 397 corneal electrodes.

22 398 Morimoto et al. investigated the stimulus conditions (Morimoto2010 Exp Eye  
23  
24  
25 399 Res) that maximized RCG survival rate using optic nerve transected rat. Also, the  
26  
27  
28 400 results of clinical trials in which electrical stimulation was applied to patients with  
29  
30  
31 401 retinitis pigmentosa (schatz2017, Bittner 2018 Acta, Wagner), optic neuropathy  
32  
33  
34 402 (Fujikado2006 JJO), and CRAO (Inomata Graefe 2007) were reported. We  
35  
36  
37 403 determined the electrical stimulation settings with reference to the results of those  
38  
39  
40 404 previous studies and conducted our exploratory study with 20 eyes of RP patients.  
41  
42  
43 405 Since improvement in visual acuity and visual field sensitivity was obtained in the  
44  
45  
46 406 study, the same stimulation settings were applied in this trial.

49 407 In the previous clinical trial, the sample size was as small as 10 and the  
50  
51  
52 408 treatment period was as short as 12 weeks. In addition, we did not set a follow-up  
53  
54  
55 409 period, thus could not evaluate the safety and efficacy post-treatment. Therefore, we  
56  
57  
58 410 decided to set the target number of patients to 50 and the treatment period to 24

1  
2  
3  
4 411 weeks. We also set the post-observation period to 36 weeks and 48 weeks to  
5  
6  
7 412 acquire data post-treatment.  
8  
9

10 413 This trial has several strengths, in addition to larger sample size and longer  
11  
12  
13 414 treatment duration. This is the first randomized, double-masked, and sham-  
14  
15  
16 415 controlled clinical trial of TdES in patients with RP. It is the first step in the clinical  
17  
18  
19 416 application of electrical stimulation therapy for other ocular diseases effectively  
20  
21  
22 417 treated by electrical stimulation. Simultaneously, we are conducting a clinical trial of  
23  
24  
25 418 TdES for central retinal artery occlusion (UMIN000036219) and non-arteritic  
26  
27  
28 419 ischemic optic neuropathy (UMIN000036220) using a similar treatment device. We  
29  
30  
31 420 intend to apply the findings as a set with the results of the aforementioned and  
32  
33  
34 421 current ePICO trial for an approval of the TdES device.  
35  
36

37 422 A limitation of this trial is the small target patient size. This can be attributed  
38  
39  
40 423 to the rare occurrence of RP (approximately 1 in 4000 people <sup>26</sup>). However, further  
41  
42  
43 424 studies are needed in the future to investigate the effects of electrical stimulation on  
44  
45  
46 425 the retina in detail. Second, we determined the electrical stimulation settings with  
47  
48  
49 426 reference to the results of previous studies. However, the ideal dose/regimen of  
50  
51  
52 427 electrical stimulation treatment is not yet known.  
53

54  
55 428 In summary, an easier and less invasive treatment method will likely become  
56  
57  
58 429 widespread in patients with RP after confirming the efficacy of TdES in this trial.  
59  
60

430

For peer review only

1  
2  
3  
4  
5  
6  
7  
8  
9  
10  
11  
12  
13  
14  
15  
16  
17  
18  
19  
20  
21  
22  
23  
24  
25  
26  
27  
28  
29  
30  
31  
32  
33  
34  
35  
36  
37  
38  
39  
40  
41  
42  
43  
44  
45  
46  
47  
48  
49  
50  
51  
52  
53  
54  
55  
56  
57  
58  
59  
60



## 431 **Acknowledgements**

432 We would like to thank all staff and patients involved in the study at the three

433 research sites and the Trial Steering Committee and Data Monitoring Committee for

434 their ongoing support throughout the trial. We would like to acknowledge the role of

435 the Clinical Research Centre, Chiba University Hospital, in supporting the ongoing

436 delivery of the trial at the sites.

437 We also thank Masao Yoshikawa, Daigo Yoshikawa, and Hidetaka Kudo of the Mayo

438 Company for providing the treatment device and technical help.

439 We would like to thank Editage (<http://www.editage.jp>) for English language editing.

## 440 **Author Contributions**

441 GM, YO, YS, YK, TI, TF, TB, HH and SY made a significant contribution to the

442 conception and design of the trial protocol. GM was the first author and wrote this

443 manuscript. GM, YO, TI, TF and HH made a major contribution to the design of this

444 trial and the development of the original trial protocol. YO, YS, and YK developed the

445 statistical analysis plan. GM, YO, YS and TF revised the manuscript. TB, HH and SY

446 supervised the trial. GM, YO, YS, YK, TI, TF, TB, HH and SY have reviewed and

447 approved the final manuscript.

## 448 **Funding**

1  
2  
3  
4 449 This study was supported by the Japan Agency for Medical Research and  
5  
6  
7 450 Development (AMED) under grant number 21hk0102072h0002.  
8  
9

10 451 This study was also supported by a Therapeutics Research Initiative Grant from the  
11  
12  
13 452 Chiba University School of Medicine 2019-G1.  
14  
15

### 16 453 **Competing Interests**

17  
18  
19 454 GM: grants from Novartis outside the submitted work. TB: personal fees from Bayer,  
20  
21  
22 455 Kowa, Santen, Senju, and Alcon, and grants and personal fees from Novartis,  
23  
24  
25 456 outside the submitted work. SY: grants and personal fees from HOYA, Senju, Pfizer,  
26  
27  
28 457 Santen, Alcon Japan, Alcon Pharma, Bayer, and Kowa, personal fees from Nikon,  
29  
30  
31 458 Wakamoto, Chuo Sangyo, Daiichi Sankyo, Jamex, Sun Contact Lens, Finedex,  
32  
33  
34 459 Novartis, Chugai, and Abbvie, outside the submitted work. HH: personal fees from  
35  
36  
37 460 Torii Yakuhin, outside the submitted work. YO, YS, YK, TI, and TF declare no  
38  
39  
40 461 competing interests associated with this manuscript. Mayo Co., Ltd. had no role in  
41  
42  
43 462 the study design, data collection, data analysis, data interpretation, or writing of the  
44  
45  
46 463 protocol.  
47  
48

### 49 464 **Patient consent for publication**

50  
51  
52 465 Obtained.  
53  
54

### 55 466 **Ethics approval**

56  
57  
58 467 The IRB of all three institutions has approved the trial.  
59  
60

1  
2  
3  
4 468 This trial will be conducted in accordance with the Ordinance on the Standards for  
5  
6  
7 469 the Implementation of Clinical Trials (GCP Ordinance) and the principles of the  
8  
9  
10 470 Declaration of Helsinki of the World Medical Association. All participants will receive  
11  
12  
13 471 adequate information about the purpose, nature, benefits, and possible risks of this  
14  
15  
16 472 trial, and alternative therapeutic choices by investigator, using an informed consent  
17  
18  
19 473 form approved by the IRB at the Chiba University Hospital and two other institutions.  
20  
21  
22 474 Participant-signed informed consent forms were required to be enrolled in this trial.  
23  
24

#### 25 475 **ORCID ID**

26  
27  
28 476 Gen Miura <http://orcid.org/0000-0001-6288-8840>  
29  
30  
31 477

#### 32 33 34 478 **References**

- 35  
36  
37 479 1. Galli-Resta L, Ensini M, Fusco E, et al. Afferent spontaneous electrical activity  
38  
39  
40 480 promotes the survival of target cells in the developing retinotectal system of the  
41  
42  
43 481 rat. *J Neurosci* 1993;13(1):243-50. doi: 10.1523/jneurosci.13-01-00243.1993  
44  
45  
46 482 [published Online First: 1993/01/01]
- 47  
48  
49 483 2. Al-Majed AA, Neumann CM, Brushart TM, et al. Brief electrical stimulation promotes  
50  
51  
52 484 the speed and accuracy of motor axonal regeneration. *J Neurosci*  
53  
54  
55 485 2000;20(7):2602-8. doi: 10.1523/jneurosci.20-07-02602.2000 [published  
56  
57  
58 486 Online First: 2000/03/24]

- 1  
2  
3  
4 487 3. Morimoto T, Miyoshi T, Fujikado T, et al. Electrical stimulation enhances the survival  
5  
6  
7 488 of axotomized retinal ganglion cells in vivo. *Neuroreport* 2002;13(2):227-30.  
8  
9  
10 489 doi: 10.1097/00001756-200202110-00011 [published Online First: 2002/03/15]  
11  
12  
13 490 4. Morimoto T, Miyoshi T, Matsuda S, et al. Transcorneal electrical stimulation rescues  
14  
15  
16 491 axotomized retinal ganglion cells by activating endogenous retinal IGF-1  
17  
18  
19 492 system. *Investigative ophthalmology & visual science* 2005;46(6):2147-55. doi:  
20  
21  
22 493 10.1167/iops.04-1339 [published Online First: 2005/05/26]  
23  
24  
25 494 5. Morimoto T, Fujikado T, Choi JS, et al. Transcorneal electrical stimulation promotes  
26  
27  
28 495 the survival of photoreceptors and preserves retinal function in royal college of  
29  
30  
31 496 surgeons rats. *Investigative ophthalmology & visual science* 2007;48(10):4725-  
32  
33  
34 497 32. doi: 10.1167/iops.06-1404 [published Online First: 2007/09/28]  
35  
36  
37 498 6. Morimoto T, Kanda H, Kondo M, et al. Transcorneal electrical stimulation promotes  
38  
39  
40 499 survival of photoreceptors and improves retinal function in rhodopsin P347L  
41  
42  
43 500 transgenic rabbits. *Investigative ophthalmology & visual science*  
44  
45  
46 501 2012;53(7):4254-61. doi: 10.1167/iops.11-9067 [published Online First:  
47  
48  
49 502 2012/05/19]  
50  
51  
52 503 7. Yu H, Enayati S, Chang K, et al. Noninvasive Electrical Stimulation Improves  
53  
54  
55 504 Photoreceptor Survival and Retinal Function in Mice with Inherited  
56  
57  
58 505 Photoreceptor Degeneration. *Investigative ophthalmology & visual science*  
59  
60

- 1  
2  
3  
4 506 2020;61(4):5. doi: 10.1167/iovs.61.4.5 [published Online First: 2020/04/10]  
5  
6  
7 507 8. Schatz A, Röck T, Naycheva L, et al. Transcorneal electrical stimulation for patients  
8  
9  
10 508 with retinitis pigmentosa: a prospective, randomized, sham-controlled  
11  
12  
13 509 exploratory study. *Investigative ophthalmology & visual science*  
14  
15  
16 510 2011;52(7):4485-96. doi: 10.1167/iovs.10-6932 [published Online First:  
17  
18  
19 511 2011/04/07]  
20  
21  
22 512 9. Bittner AK, Seger K, Salveson R, et al. Randomized controlled trial of electro-  
23  
24  
25 513 stimulation therapies to modulate retinal blood flow and visual function in  
26  
27  
28 514 retinitis pigmentosa. *Acta ophthalmologica* 2018;96(3):e366-e76. doi:  
29  
30  
31 515 10.1111/aos.13581 [published Online First: 2017/11/14]  
32  
33  
34 516 10. Perin C, Viganò B, Piscitelli D, et al. Non-invasive current stimulation in vision  
35  
36  
37 517 recovery: a review of the literature. *Restor Neurol Neurosci* 2020;38(3):239-50.  
38  
39  
40 518 doi: 10.3233/rnn-190948 [published Online First: 2019/12/31]  
41  
42  
43 519 11. Schatz A, Pach J, Gosheva M, et al. Transcorneal Electrical Stimulation for  
44  
45  
46 520 Patients With Retinitis Pigmentosa: A Prospective, Randomized, Sham-  
47  
48  
49 521 Controlled Follow-up Study Over 1 Year. *Investigative ophthalmology & visual*  
50  
51  
52 522 *science* 2017;58(1):257-69. doi: 10.1167/iovs.16-19906 [published Online First:  
53  
54  
55 523 2017/01/24]  
56  
57  
58 524 12. Jackson TL, Mandava N, Quiroz-Mercado H, et al. Intravitreal quantum dots for  
59  
60

- 1  
2  
3  
4 525 retinitis pigmentosa: a first-in-human safety study. *Nanomedicine (Lond)*  
5  
6  
7 526 2021;16(8):617-26. doi: 10.2217/nnm-2020-0471 [published Online First:  
8  
9  
10 527 2021/03/20]
- 11  
12  
13 528 13. Miura G, Sugawara T, Kawasaki Y, et al. Clinical Trial to Evaluate Safety and  
14  
15  
16 529 Efficacy of Transdermal Electrical Stimulation on Visual Functions of Patients  
17  
18  
19 530 with Retinitis Pigmentosa. *Scientific reports* 2019;9(1):11668. doi:  
20  
21  
22 531 10.1038/s41598-019-48158-5 [published Online First: 2019/08/14]
- 23  
24  
25 532 14. Holladay JT. Visual acuity measurements. *J Cataract Refract Surg*  
26  
27  
28 533 2004;30(2):287-90. doi: 10.1016/j.jcrs.2004.01.014 [published Online First:  
29  
30  
31 534 2004/03/20]
- 32  
33  
34 535 15. Suzukamo Y, Oshika T, Yuzawa M, et al. Psychometric properties of the 25-item  
35  
36  
37 536 National Eye Institute Visual Function Questionnaire (NEI VFQ-25), Japanese  
38  
39  
40 537 version. *Health Qual Life Outcomes* 2005;3:65. doi: 10.1186/1477-7525-3-65  
41  
42  
43 538 [published Online First: 2005/10/27]
- 44  
45  
46 539 16. Yamamoto S, Sugawara T, Murakami A, et al. Topical isopropyl unoprostone for  
47  
48  
49 540 retinitis pigmentosa: microperimetric results of the phase 2 clinical study.  
50  
51  
52 541 *Ophthalmology and therapy* 2012;1(1):5-5. doi: 10.1007/s40123-012-0005-9  
53  
54  
55 542 [published Online First: 2012/09/06]
- 56  
57  
58 543 17. Emery JM, Little JH. Phacoemulsification and aspiration of cataracts : surgical  
59  
60

- 1  
2  
3  
4 544 techniques, complications, and results: Mosby 1979.  
5  
6  
7 545 18. Rosenfeld PJ, Brown DM, Heier JS, et al. Ranibizumab for neovascular age-  
8  
9  
10 546 related macular degeneration. *N Engl J Med* 2006;355(14):1419-31. doi:  
11  
12  
13 547 10.1056/NEJMoa054481 [published Online First: 2006/10/06]  
14  
15  
16 548 19. Fujikado T, Morimoto T, Matsushita K, et al. Effect of transcorneal electrical  
17  
18  
19 549 stimulation in patients with nonarteritic ischemic optic neuropathy or traumatic  
20  
21  
22 550 optic neuropathy. *Japanese journal of ophthalmology* 2006;50(3):266-73. doi:  
23  
24  
25 551 10.1007/s10384-005-0304-y [published Online First: 2006/06/13]  
26  
27  
28 552 20. Inomata K, Shinoda K, Ohde H, et al. Transcorneal electrical stimulation of retina  
29  
30  
31 553 to treat longstanding retinal artery occlusion. *Graefe's archive for clinical and*  
32  
33  
34 554 *experimental ophthalmology = Albrecht von Graefes Archiv fur klinische und*  
35  
36  
37 555 *experimentelle Ophthalmologie* 2007;245(12):1773-80. doi: 10.1007/s00417-  
38  
39  
40 556 007-0610-9 [published Online First: 2007/06/27]  
41  
42  
43 557 21. Oono S, Kurimoto T, Kashimoto R, et al. Transcorneal electrical stimulation  
44  
45  
46 558 improves visual function in eyes with branch retinal artery occlusion. *Clinical*  
47  
48  
49 559 *ophthalmology (Auckland, NZ)* 2011;5:397-402. doi: 10.2147/oph.S17751  
50  
51  
52 560 [published Online First: 2011/04/19]  
53  
54  
55 561 22. Shinoda K, Imamura Y, Matsuda S, et al. Transcutaneous electrical retinal  
56  
57  
58 562 stimulation therapy for age-related macular degeneration. *Open Ophthalmol J*  
59  
60

- 1  
2  
3  
4 563 2008;2:132-6. doi: 10.2174/1874364100802010132 [published Online First:  
5  
6  
7 564 2008/01/01]  
8  
9  
10 565 23. Chaikin L, Kashiwa K, Bennet M, et al. Microcurrent stimulation in the treatment of  
11  
12  
13 566 dry and wet macular degeneration. *Clinical ophthalmology (Auckland, NZ)*  
14  
15  
16 567 2015;9:2345-53. doi: 10.2147/opth.S92296 [published Online First:  
17  
18  
19 568 2016/01/01]  
20  
21  
22 569 24. Ota Y, Ozeki N, Yuki K, et al. The Efficacy of Transcorneal Electrical Stimulation  
23  
24  
25 570 for the Treatment of Primary Open-angle Glaucoma: A Pilot Study. *Keio J Med*  
26  
27  
28 571 2018;67(3):45-53. doi: 10.2302/kjm.2017-0015-OA [published Online First:  
29  
30  
31 572 2018/02/09]  
32  
33  
34 573 25. Kurimoto T, Ueda K, Mori S, et al. A Single-Arm, Prospective, Exploratory Study  
35  
36  
37 574 to Preliminarily Test Effectiveness and Safety of Skin Electrical Stimulation for  
38  
39  
40 575 Leber Hereditary Optic Neuropathy. *J Clin Med* 2020;9(5) doi:  
41  
42  
43 576 10.3390/jcm9051359 [published Online First: 2020/05/10]  
44  
45  
46 577 26. Hartong DT, Berson EL, Dryja TP. Retinitis pigmentosa. *Lancet*  
47  
48  
49 578 2006;368(9549):1795-809. doi: 10.1016/s0140-6736(06)69740-7 [published  
50  
51  
52 579 Online First: 2006/11/23]  
53  
54  
55 580  
56  
57 581  
58  
59  
60



1  
2  
3  
4  
5  
6  
7  
8  
9  
10  
11  
12  
13  
14  
15  
16  
17  
18  
19  
20  
21  
22  
23  
24  
25  
26  
27  
28  
29  
30  
31  
32  
33  
34  
35  
36  
37  
38  
39  
40  
41  
42  
43  
44  
45  
46  
47  
48  
49  
50  
51  
52  
53  
54  
55  
56  
57  
58  
59  
60

582 **Figure legend**

583 **Figure 1.** Trial design

584 TdES: Transdermal electrical stimulation.

585

586 **Figure 2.** The prototype equipment for transdermal electrical stimulation.

587

For peer review only

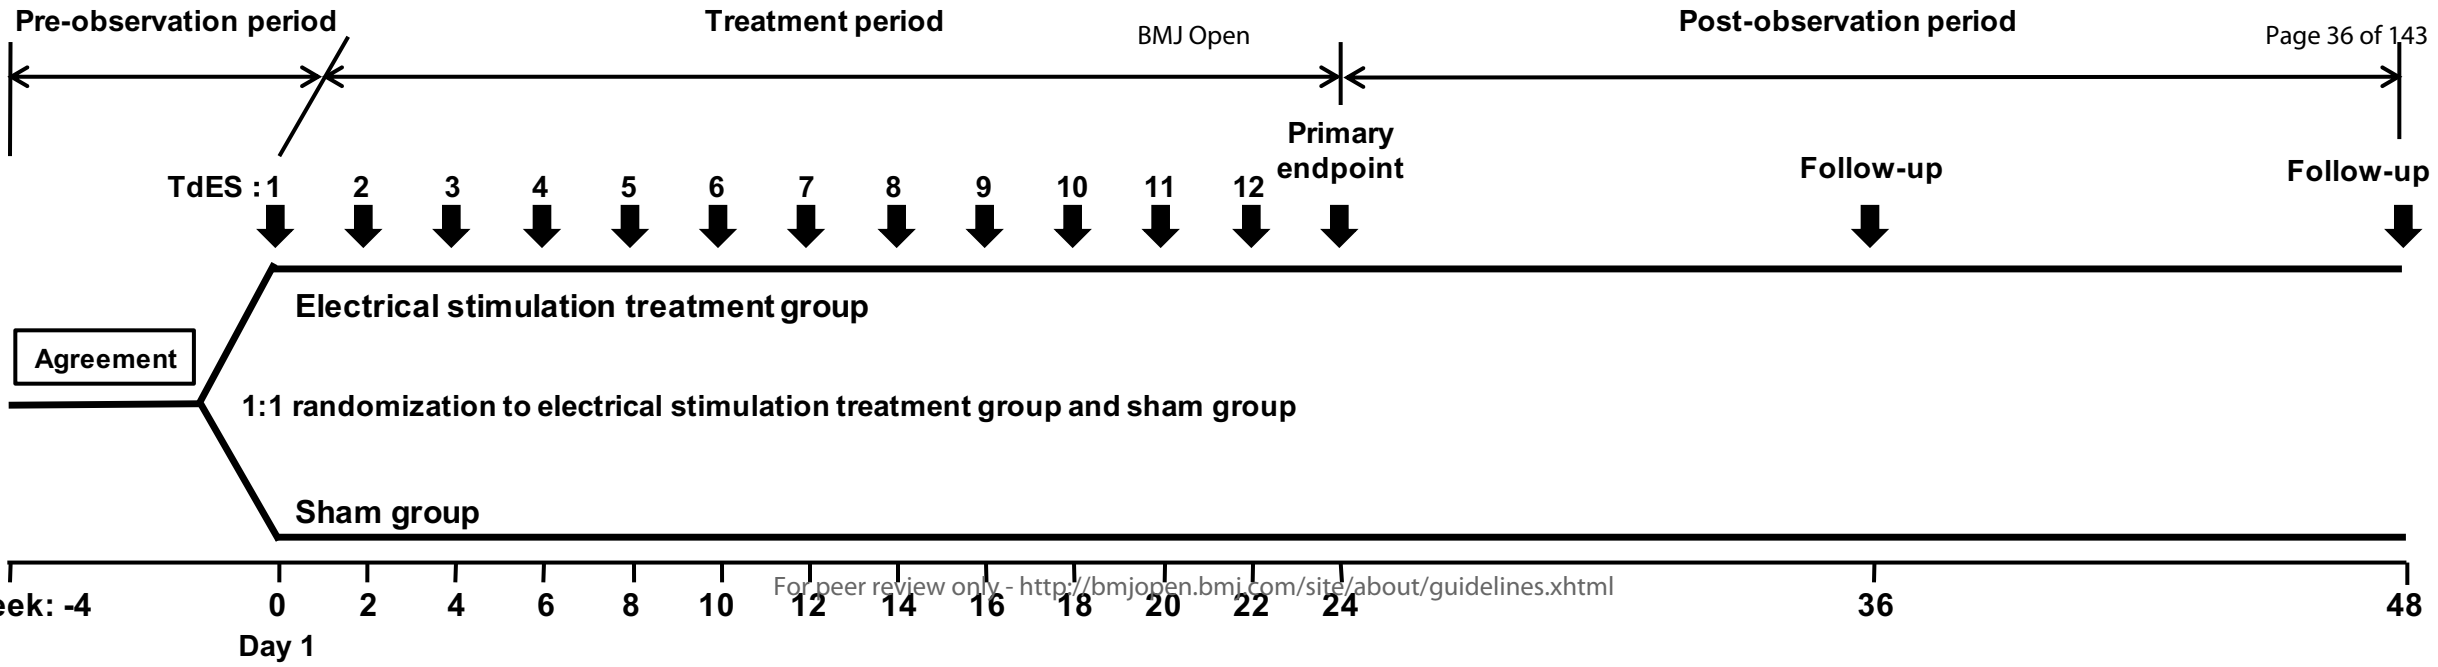

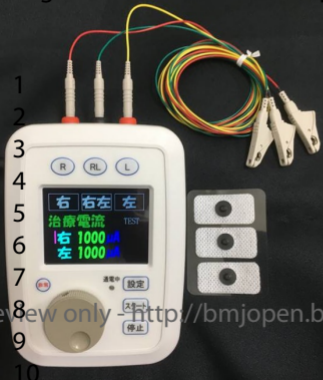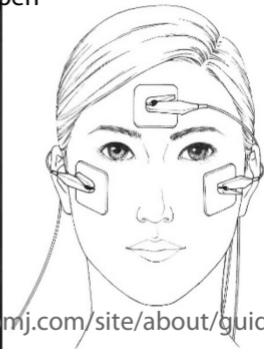

# 治験実施計画書

## 網膜色素変性を対象とした経皮膚電気刺激装置の有効性及び安全性を検証するシャム対照二重遮蔽比較試験

版数 2.1 版  
作成日 2021 年 5 月 25 日

### 改訂履歴

| 作成日             | 版数    |
|-----------------|-------|
| 2021 年 4 月 1 日  | 1.0 版 |
| 2021 年 5 月 10 日 | 2.0 版 |
| 2021 年 5 月 25 日 | 2.1 版 |

治験実施計画書番号 CCRC1804

### 機密情報に関する注意

本治験実施計画書は機密情報であり、本治験に参加する治験責任医師、治験分担医師、治験協力者、実施医療機関、治験審査委員会、データモニタリング委員会に対して提供されるものです。よって、被験者に説明する場合を除き、治験責任医師及び治験機器提供者である有限会社メイヨーの文書による同意なしに、いかなる第三者にも開示し、又は本治験の目的以外に利用することはできません。また、本治験の結果の一部又は全部を学会、雑誌等外部に発表する場合には、治験責任医師及び有限会社メイヨーの承諾が必要となりますので、あらかじめ、治験調整医師までご連絡頂きますようお願いいたします。

1  
2  
3  
4 <目次>

5 0. 治験の概要 ..... 8

6 1. 緒言 ..... 12

7 1.1. 治験の背景 ..... 12

8 1.2. 網膜色素変性に対する標準治療 ..... 13

9 1.3. 治験機器の概要 ..... 13

10 1.3.1. 使用方法 ..... 13

11 1.3.2. 非臨床成績 ..... 14

12 1.3.3. 臨床試験成績 ..... 14

13 1.3.3.1. 国内臨床成績 ..... 14

14 1.3.3.2. 海外臨床試験成績 ..... 14

15 1.3.4. 予想される有害事象及び不具合等 ..... 15

16 2. 治験の目的と治験実施の妥当性 ..... 15

17 2.1. 目的 ..... 15

18 2.2. 本治験実施の妥当性 ..... 15

19 3. 対象患者 ..... 15

20 3.1. 選択基準 ..... 15

21 3.2. 除外基準 ..... 16

22 4. 被験者の同意 ..... 18

23 4.1. 同意文書及びその他の説明文書の作成並びに改訂 ..... 18

24 4.2. 同意取得の時期と方法 ..... 18

25 4.3. 被験者に対する説明事項 ..... 19

26 5. 治験の方法 ..... 20

27 5.1. 治験のデザイン ..... 20

28 5.2. 目標被験者数と治験実施期間 ..... 21

29 5.3. 施設登録 ..... 21

30 5.3.1. 施設登録 ..... 21

31 5.3.2. 施設登録先 ..... 21

32 5.4. 症例登録 ..... 21

33 5.4.1. 症例登録・割付 ..... 21

34 5.4.2. 症例登録先 ..... 22

35 5.4.3. 割付調整因子 ..... 22

36 5.4.4. 割付情報の管理 ..... 22

37 5.5. 遮蔽化 ..... 22

38 5.6. コードの開鍵 ..... 22

39 5.7. 緊急コード開封の手続き ..... 22

40  
41  
42  
43  
44  
45  
46  
47  
48  
49  
50  
51  
52  
53  
54  
55  
56  
57  
58  
59  
60

|    |                                  |    |
|----|----------------------------------|----|
| 1  |                                  |    |
| 2  |                                  |    |
| 3  |                                  |    |
| 4  | 5.8. 登録されなかった被験者の取り扱い .....      | 22 |
| 5  | 5.9. 個々の症例の中止基準 .....            | 23 |
| 6  |                                  |    |
| 7  | 5.10. 併用可能薬及び併用可能療法 .....        | 23 |
| 8  |                                  |    |
| 9  | 5.11. 併用禁止薬及び併用禁止療法 .....        | 23 |
| 10 | 5.12. 併用制限薬 .....                | 23 |
| 11 |                                  |    |
| 12 | 5.13. 治験中止後の対応 .....             | 23 |
| 13 | 6. 治験機器 .....                    | 24 |
| 14 |                                  |    |
| 15 | 6.1. 外観及び構成 .....                | 24 |
| 16 | 6.2. 安全装置 .....                  | 25 |
| 17 |                                  |    |
| 18 | 6.3. 作動原理 .....                  | 25 |
| 19 |                                  |    |
| 20 | 6.4. 品質 .....                    | 25 |
| 21 | 6.4.1. 安全性 .....                 | 26 |
| 22 | 6.4.2. 性能 .....                  | 26 |
| 23 | 6.4.3. 製造 .....                  | 26 |
| 24 |                                  |    |
| 25 | 6.5. 包装・表示 .....                 | 27 |
| 26 |                                  |    |
| 27 | 6.6. 管理方法 .....                  | 27 |
| 28 |                                  |    |
| 29 | 7. 観察・検査・評価項目、方法及び実施時期 .....     | 28 |
| 30 |                                  |    |
| 31 | 7.1. 実施スケジュールと手順 .....           | 28 |
| 32 | 7.1.1. スクリーニング検査 .....           | 30 |
| 33 | 7.1.2. 被験者の情報 .....              | 31 |
| 34 | 7.1.3. 観察・検査・評価項目 .....          | 31 |
| 35 |                                  |    |
| 36 | 8. 有害事象発生時の取り扱い .....            | 35 |
| 37 |                                  |    |
| 38 | 8.1. 有害事象、不具合及び機器関連有害事象の定義 ..... | 35 |
| 39 | 8.2. 有害事象又は不具合発生時の被験者への対応 .....  | 35 |
| 40 | 8.3. 報告の対象となる有害事象及び不具合 .....     | 35 |
| 41 | 8.4. 有害事象及び不具合発生時の報告手順 .....     | 35 |
| 42 | 8.5. 有害事象及び不具合の評価に必要な記載内容 .....  | 35 |
| 43 |                                  |    |
| 44 | 8.5.1. 有害事象 .....                | 35 |
| 45 | 8.5.2. 不具合 .....                 | 36 |
| 46 | 8.5.3. 有害事象の回復性と治験機器との因果関係 ..... | 36 |
| 47 | 8.5.3.1. 治験機器との因果関係 .....        | 36 |
| 48 | 8.5.3.2. 治験機器に関する処置 .....        | 36 |
| 49 | 8.5.3.3. 転帰 .....                | 37 |
| 50 | 8.6. 重篤な有害事象発生時の取り扱い .....       | 37 |
| 51 |                                  |    |
| 52 | 8.6.1. 重篤な有害事象の定義 .....          | 37 |
| 53 | 8.6.2. 報告の対象となる重篤な有害事象 .....     | 37 |
| 54 |                                  |    |
| 55 |                                  |    |
| 56 |                                  |    |
| 57 |                                  |    |
| 58 |                                  |    |
| 59 |                                  |    |
| 60 |                                  |    |

|    |                                                |    |
|----|------------------------------------------------|----|
| 1  |                                                |    |
| 2  |                                                |    |
| 3  |                                                |    |
| 4  | 8.6.3. 重篤な有害事象等の報告手順 .....                     | 38 |
| 5  | 9. 評価項目 .....                                  | 39 |
| 6  | 9.1. 主要評価項目 .....                              | 39 |
| 7  | 9.2. 副次評価項目 .....                              | 39 |
| 8  | 9.3. 探索的評価項目 .....                             | 39 |
| 9  | 9.4. 安全性評価項目 .....                             | 40 |
| 10 | 10. 統計学的事項 .....                               | 40 |
| 11 | 10.1. 解析対象集団 .....                             | 41 |
| 12 | 10.1.1. 安全性解析対象集団 .....                        | 41 |
| 13 | 10.1.2. 最大の解析対象集団 .....                        | 41 |
| 14 | 10.1.3. 治験実施計画書に適合した対象集団 .....                 | 41 |
| 15 | 10.2. 目標症例数と設定根拠 .....                         | 41 |
| 16 | 10.3. 症例の取り扱い .....                            | 41 |
| 17 | 10.4. データの取り扱い .....                           | 42 |
| 18 | 10.5. 統計解析項目及び解析計画 .....                       | 42 |
| 19 | 10.5.1. 被験者背景の解析 .....                         | 42 |
| 20 | 10.5.2. 安全性及び有効性の解析 .....                      | 43 |
| 21 | 10.5.2.1. 主たる解析 .....                          | 43 |
| 22 | 10.5.2.2. 副次解析 .....                           | 43 |
| 23 | 10.5.2.3. 探索的解析 .....                          | 43 |
| 24 | 10.5.3. 安全性の解析 .....                           | 43 |
| 25 | 10.6. データモニタリング委員会 .....                       | 43 |
| 26 | 10.7. 最終解析 .....                               | 43 |
| 27 | 11. 治験実施計画書の遵守及び逸脱 .....                       | 43 |
| 28 | 12. 治験実施計画書、症例報告書又は解析計画に関する変更 .....            | 44 |
| 29 | 12.1. 治験実施計画書及び症例報告書の改訂 .....                  | 44 |
| 30 | 12.2. 統計解析計画の変更 .....                          | 44 |
| 31 | 13. 治験の中止、中断又は終了 .....                         | 44 |
| 32 | 13.1. 治験全体での中止又は中断の基準 .....                    | 44 |
| 33 | 13.2. 治験全体での中止又は中断する場合の手続き .....               | 44 |
| 34 | 13.3. 個々の実施医療機関での治験の中止又は中断する場合の手続き .....       | 45 |
| 35 | 13.4. 治験の終了 .....                              | 45 |
| 36 | 14. データマネジメント .....                            | 45 |
| 37 | 14.1. データマネジメントの手順 .....                       | 45 |
| 38 | 14.2. データの収集 .....                             | 45 |
| 39 | 14.3. 症例報告書に直接記入され、かつ原資料（原データ）と解すべき資料の特定 ..... | 45 |
| 40 |                                                |    |
| 41 |                                                |    |
| 42 |                                                |    |
| 43 |                                                |    |
| 44 |                                                |    |
| 45 |                                                |    |
| 46 |                                                |    |
| 47 |                                                |    |
| 48 |                                                |    |
| 49 |                                                |    |
| 50 |                                                |    |
| 51 |                                                |    |
| 52 |                                                |    |
| 53 |                                                |    |
| 54 |                                                |    |
| 55 |                                                |    |
| 56 |                                                |    |
| 57 |                                                |    |
| 58 |                                                |    |
| 59 |                                                |    |
| 60 |                                                |    |

|    |                                         |    |
|----|-----------------------------------------|----|
| 1  |                                         |    |
| 2  |                                         |    |
| 3  |                                         |    |
| 4  | 15. 記録の保存 .....                         | 46 |
| 5  | 15.1. 実施医療機関による記録の保存 .....              | 46 |
| 6  | 15.2. 治験責任医師による記録の保存 .....              | 46 |
| 7  |                                         |    |
| 8  | 16. 原資料の直接閲覧 .....                      | 46 |
| 9  |                                         |    |
| 10 | 17. 治験の品質管理及び品質保証 .....                 | 46 |
| 11 | 17.1. 品質管理 .....                        | 46 |
| 12 | 17.2. 品質保証 .....                        | 47 |
| 13 |                                         |    |
| 14 | 18. 倫理及び GCP .....                      | 47 |
| 15 |                                         |    |
| 16 | 19. 治験審査委員会 .....                       | 47 |
| 17 |                                         |    |
| 18 | 20. 健康被害補償及び保険 .....                    | 47 |
| 19 | 21. 治験に関する費用負担 .....                    | 48 |
| 20 | 22. 研究資金及び利益相反 .....                    | 48 |
| 21 | 23. 治験のデータベース登録 .....                   | 48 |
| 22 | 24. 付録 .....                            | 48 |
| 23 |                                         |    |
| 24 | 25. 治験実施体制 .....                        | 48 |
| 25 |                                         |    |
| 26 | 26. SARS-CoV-2 流行時における治験手順の一時的な変更 ..... | 48 |
| 27 |                                         |    |
| 28 | 27. 参考資料・文献リスト .....                    | 49 |
| 29 |                                         |    |
| 30 |                                         |    |
| 31 |                                         |    |
| 32 |                                         |    |
| 33 |                                         |    |
| 34 |                                         |    |
| 35 |                                         |    |
| 36 |                                         |    |
| 37 |                                         |    |
| 38 |                                         |    |
| 39 |                                         |    |
| 40 |                                         |    |
| 41 |                                         |    |
| 42 |                                         |    |
| 43 |                                         |    |
| 44 |                                         |    |
| 45 |                                         |    |
| 46 |                                         |    |
| 47 |                                         |    |
| 48 |                                         |    |
| 49 |                                         |    |
| 50 |                                         |    |
| 51 |                                         |    |
| 52 |                                         |    |
| 53 |                                         |    |
| 54 |                                         |    |
| 55 |                                         |    |
| 56 |                                         |    |
| 57 |                                         |    |
| 58 |                                         |    |
| 59 |                                         |    |
| 60 |                                         |    |



1  
2  
3  
4 <略語・用語集>

5 本治験実施計画書における略語・略記・用語の定義を以下に示す。

| 略号・略記・用語 | 定義                                         |                       |
|----------|--------------------------------------------|-----------------------|
| AC       | alternating current                        | 交流電流                  |
| Ag/AgCl  | silver/silver chloride                     | 銀/塩化銀                 |
| ALT      | alanine aminotransferase                   | アラニンアミノ基転移酵素 (GPT)    |
| ALP      | alkaline phosphatase                       | アルカリホスファターゼ           |
| AST      | aspartate aminotransferase                 | アスパラギン酸アミノ基転移酵素 (GOT) |
| BDNF     | brain-derived neurotrophic factor          | 脳由来神経栄養因子             |
| BRAO     | branch retinal artery occlusion            | 網膜動脈分枝閉塞症             |
| BUN      | blood urea nitrogen                        | 尿素窒素                  |
| CNTF     | ciliary neurotrophic factor                | 毛様体神経栄養因子             |
| COX-2    | cyclooxygenase-2                           | シクロオキシゲナーゼ-2          |
| CRC      | clinical research coordinator              | 治験コーディネーター            |
| CRP      | C-reactive protein                         | C反応性蛋白                |
| dB       | decibel                                    | デシベル                  |
| DC       | direct current                             | 直流電流                  |
| ERG      | electroretinogram                          | 網膜電図                  |
| ETDRS    | early treatment diabetic retinopathy study | 早期糖尿病網膜症治療調査          |
| EZ       | ellipsoid zone                             | エリプソイドゾーン             |
| FAS      | full analysis set                          | 最大の解析対象集団             |
| FGF1     | fibroblast growth factor                   | 線維芽細胞増殖因子 1           |
| GOT      | glutamic oxaloacetic transaminase          | グルタミン酸オキサロ酢酸トランスアミナーゼ |
| GP       | goldmann perimetry                         | ゴールドマン視野計             |
| GPT      | glutamic-pyruvic transaminase              | グルタミン酸ピルビン酸トランスアミナーゼ  |
| HbA1c    | hemoglobin A1c                             | 糖化ヘモグロビン              |
| HFA      | humphrey field analyzer                    | ハンフリー視野計              |
| Hz       | hertz                                      | ヘルツ                   |

|            |                                                                  |                               |
|------------|------------------------------------------------------------------|-------------------------------|
| IGF-1      | insulin-like growth factors                                      | インスリン様成長因子-1                  |
| IL-1b      | interleukin-1b                                                   | サイトカイン(インターロイキン-1 ベータ)        |
| IL-6       | interleukin-6                                                    | サイトカイン (インターロイキン-6)           |
| IL-10      | interleukin-10                                                   | サイトカイン (インターロイキン-10)          |
| IS/OS      | photoreceptor inner/outersegment junction                        | 視細胞内節外節接合部                    |
| LLT        | lowest level terms                                               | 下層語                           |
| mA         | milliampere                                                      | ミリアンペア                        |
| MD         | mean deviation                                                   | 平均偏差                          |
| MedDRA/J   | medical dictionary for regulatory activities/ Japanese           | 医薬品規制調和国際会議 (ICH) 国際医薬用語集日本語版 |
| mmHg       | millimeter Hg                                                    | ミリメートル水銀柱                     |
| msec       | milli second                                                     | ミリ秒                           |
| NGSP       | national glycohemoglobin standardization program                 | 全米グリコヘモグロビン標準化プログラム           |
| NF-κB      | nuclear factor kappa-light-chain-enhancer of activated B cells   | 核内因子 κB                       |
| NEI VFQ 25 | the 25-item national eye institute visual function questionnaire | 米国国立眼病研究所 25 項目視覚機能質問票        |
| OCT        | optical coherence tomography                                     | 光干渉断層計                        |
| PMDA       | pharmaceuticals and medical devices agency                       | 独立行政法人 医薬品医療機器総合機構            |
| PPS        | per protocol set                                                 | 治験実施計画書に適合した対象集団              |
| PT         | preferred terms                                                  | 基本語                           |
| RP         | retinitis pigmentosa                                             | 網膜色素変性                        |
| SOC        | system organ class                                               | 器官別大分類                        |
| TdES       | transdermal electrical stimulation                               | 経皮膚電気刺激                       |
| TES        | trancorneal electrical stimulation                               | 経角膜電気刺激                       |
| TNF-α      | tumor necrosis factor-α                                          | 腫瘍壊死因子                        |
| UMIN       | university hospital medical information network                  | 大学病院医療情報ネットワーク                |
| VFQ        | visual function questionaire                                     | 視機能質問票                        |

## 0. 治験の概要

|        |                                                                                                                                                                                                                                                                                                                                                                                                                                                                                                                                                                                                                                                                                       |
|--------|---------------------------------------------------------------------------------------------------------------------------------------------------------------------------------------------------------------------------------------------------------------------------------------------------------------------------------------------------------------------------------------------------------------------------------------------------------------------------------------------------------------------------------------------------------------------------------------------------------------------------------------------------------------------------------------|
| 治験課題名  | 網膜色素変性を対象とした経皮膚電気刺激装置の有効性及び安全性を検証するシヤム対照二重遮蔽比較試験                                                                                                                                                                                                                                                                                                                                                                                                                                                                                                                                                                                                                                      |
| 治験の目的  | 網膜色素変性患者に対する、皮膚電極を用いた経皮膚電気刺激による視機能の維持・改善効果及び安全性をシヤム群と比較し検証すること。                                                                                                                                                                                                                                                                                                                                                                                                                                                                                                                                                                                                                       |
| 治験デザイン | ランダム化、二重遮蔽、シヤム対照、多施設共同、検証的                                                                                                                                                                                                                                                                                                                                                                                                                                                                                                                                                                                                                                                            |
| 被験機器   | <p>1) 概要<br/>電気刺激用皮膚電極を両眼の下眼瞼耳側及び前額部の中央の皮膚に装着し、各種条件下である一定の電気刺激を与え、網膜及び視神経疾患等を対象として治療を行うための機器である。</p> <p>2) 構成<br/>「電気刺激装置」、「皮膚電極」とそれらを繋ぐ「電極接続ケーブル」から構成されている。</p> <p>3) 仕様</p> <p>(1) 電気刺激装置</p> <ul style="list-style-type: none"> <li>・ 電流値 : 0~2,000 <math>\mu</math> A</li> <li>・ 刺激頻度 : 20 Hz</li> <li>・ 出力波形 : 正負両相</li> <li>・ パルス幅 : 各相 10 msec</li> </ul> <p>(2) 皮膚電極 (積水化成工業 (株))</p> <ul style="list-style-type: none"> <li>・ 大きさ : 19×38 mm のディスプレイ電極</li> <li>・ 電極素子 : Ag/AgCl</li> <li>・ 基材 : 不織布</li> <li>・ ゲル : 導電性粘着ゲル</li> </ul> <p>(3) 電気容量</p> <p>AC アダプタ定格 (入力) AC 100V 50/60 Hz 30 VA<br/>AC アダプタ定格 (出力) DC 5V 4 A</p> <p>(4) 重量 : 約 300 g、寸法 : 140×100×69 mm</p> |
| 選択基準   | <p>以下のすべての条件に該当する患者を対象とする。ただし、2)~4) に関しては評価眼に関して、以下の基準を満たすこと。</p> <ol style="list-style-type: none"> <li>1) 同意取得時の年齢が 20 歳以上 80 歳未満の定型網膜色素変性患者。</li> <li>2) 信頼性 (固視不良率 20% 未満、偽陽性率 15% 未満、偽陰性率 33% 未満) のある静的視野検査 (HFA) 10-2 プログラムの計測値を示す患者。</li> <li>3) 小数視力が 0.1~0.7 の患者。</li> <li>4) 静的視野検査 (HFA) 10-2 プログラム MD (Mean Deviation : MD) 値が -10 dB 未満の患者。</li> <li>5) 本治験の参加にあたり十分な説明を受けた後、十分な理解のうえ、本人の自由意思による文書同意が得られた患者。</li> <li>6) 2 週おきに 24 週間の通院が可能でかつ、36 週及び 48 週の後観察の通院が可能な患者。</li> <li>7) 治験期間中に適切な避妊措置を実施することが可能な患者。</li> </ol>                                                                                                                                              |

|      |                                                                                                                                                                                                                                                                                                                                                                                                                                                                                                                                                                                                                                                                                                                                                                                                                                                                                                                                                                                                                                                                                                                                                                                                                                                                 |
|------|-----------------------------------------------------------------------------------------------------------------------------------------------------------------------------------------------------------------------------------------------------------------------------------------------------------------------------------------------------------------------------------------------------------------------------------------------------------------------------------------------------------------------------------------------------------------------------------------------------------------------------------------------------------------------------------------------------------------------------------------------------------------------------------------------------------------------------------------------------------------------------------------------------------------------------------------------------------------------------------------------------------------------------------------------------------------------------------------------------------------------------------------------------------------------------------------------------------------------------------------------------------------|
| 除外基準 | <p>以下のいずれかの条件に該当する患者は対象としない。ただし、2), 5), 6)に関しては評価眼に関して以下のいずれかの条件に該当する患者は対象としないこと。</p> <ol style="list-style-type: none"> <li>1) 過去に眼疾患に対する電気刺激治療を受けたことのある患者。</li> <li>2) 3ヶ月以内に内眼部手術を受けている患者。</li> <li>3) スクリーニング前 31 日以内にイソプロピルウノプロストン・カルシウム拮抗薬・暗順応改善薬の用量・用法を変更した患者。</li> <li>4) 治験期間中に使用する予定の薬剤（散瞳薬、点眼麻酔薬等）に対し、薬剤アレルギーの既往のある患者。</li> <li>5) 評価眼の視機能に重大な影響を及ぼす合併症を有する患者：硝子体黄斑牽引症候群、黄斑浮腫、黄斑前膜、後部ぶどう腫を伴う強度近視などの黄斑病変、糖尿病網膜症、外眼部の炎症、感染症、重度のドライアイ、網膜中心動脈閉塞症、後部虚血性視神経症、視神経疾患の既往、中等度以上の核白内障、視力に重大な影響を及ぼす前囊下及び後囊下白内障、後発白内障。</li> <li>6) 直近3年間の視力、OCT 所見、視野検査での視野感度のいずれも全く悪化が見られない患者。ただし、組み入れ時の参考資料として他院のデータを使用可とする。</li> <li>7) ペースメーカーもしくは除細動器が植え込まれている患者。</li> <li>8) 悪性腫瘍の既往又は合併のある患者。ただし、既往はあるが5年以上再発していない患者は登録可とする。</li> <li>9) 認知症、精神疾患と診断され治療中の患者。</li> <li>10) 血糖コントロールが著しく不良な糖尿病（HbA1c(NGSP) &gt; 10.0%）を合併している患者。</li> <li>11) 内服治療をしてもコントロール困難な高血圧症（収縮期 <math>\geq 180</math> mmHg、かつ／又は、拡張期 <math>\geq 110</math> mmHg）の患者。</li> <li>12) スクリーニング時の臨床検査で、下記のいずれかに該当する肝・腎機能障害が認められる患者。 <ul style="list-style-type: none"> <li>・ AST、ALT：（施設）基準値上限の3倍超</li> <li>・ 血清クレアチニン：（施設）基準値上限の1.5倍超</li> </ul> </li> <li>13) 妊娠、授乳中（授乳を中止する場合も含む）又は本治験中に妊娠を希望している患者。</li> <li>14) 現在、他の治験に参加している患者。</li> <li>15) その他、治験責任医師又は治験分担医師が本治験の参加の対象として不相当と判断した患者。</li> </ol> |
| 評価項目 | <p>&lt;主要評価項目&gt;：評価眼</p> <p>24 週時における logMAR 視力（矯正小数視力から換算）の 0 週からの変化量における電気刺激群のシャム群に対する優越性</p> <p>&lt;副次評価項目&gt;：評価眼</p> <p>24 週の下記測定項目における電気刺激群とシャム群の比較</p> <ol style="list-style-type: none"> <li>1) logMAR 視力</li> <li>2) ETDRS チャートを用いた ETDRS 視力</li> </ol>                                                                                                                                                                                                                                                                                                                                                                                                                                                                                                                                                                                                                                                                                                                                                                                                                                                                                                                                                                                               |

|      |                                                                                                                                                                                                                                                                                                                                                                                                                                                                                                                                                                                                                                                                                                                                                                                                                    |
|------|--------------------------------------------------------------------------------------------------------------------------------------------------------------------------------------------------------------------------------------------------------------------------------------------------------------------------------------------------------------------------------------------------------------------------------------------------------------------------------------------------------------------------------------------------------------------------------------------------------------------------------------------------------------------------------------------------------------------------------------------------------------------------------------------------------------------|
|      | <p>3) 静的視野検査 (HFA) : 10-2 プログラム MD 値の網膜感度</p> <p>4) 静的視野検査 (HFA) : エスターマンテスト (100 点) スコア</p> <p>5) 光干渉断層計 (OCT) : 黄斑部エリプソイドゾーン長</p> <p>6) 光干渉断層計 (OCT) : 中心窩網膜厚</p> <p>7) logMAR 視力下面積</p> <p>8) NEI VFQ-25 コンポ 9</p> <p>&lt;探索的評価項目&gt; : 評価眼</p> <p>36 週及び 48 週の下記測定項目における電気刺激群とシヤム群の比較</p> <p>➤ 36 週時点</p> <p>1) logMAR 視力</p> <p>2) ETDRS チャートを用いた ETDRS 視力</p> <p>3) 光干渉断層計 (OCT) : 黄斑部エリプソイドゾーン長</p> <p>4) 光干渉断層計 (OCT) : 中心窩網膜厚</p> <p>➤ 48 週時点</p> <p>1) logMAR 視力</p> <p>2) ETDRS チャートを用いた ETDRS 視力</p> <p>3) 静的視野検査 (HFA) : 10-2 プログラム MD 値の網膜感度</p> <p>4) 静的視野検査 (HFA) : エスターマンテスト (100 点) スコア</p> <p>5) 光干渉断層計 (OCT) : 黄斑部エリプソイドゾーン長</p> <p>6) 光干渉断層計 (OCT) : 中心窩網膜厚</p> <p>&lt;安全性評価項目&gt;</p> <p>1) 有害事象の発現状況 (種類、頻度及び重症度等)</p> <p>2) 自覚症状他覚所見</p> <p>3) 光干渉断層計 (OCT) による安全性評価 (電気刺激の網膜への安全性も含む)</p> |
| 治験方法 | <p>1) 本治験は、前観察期間、評価期間及び後観察期間から成る。<br/>(詳細は、「7.1 実施スケジュールと手順」を参照する。)</p> <p>2) 登録・割付完了後、治療を開始する。</p> <p>3) 評価期間は 24 週間とし、皮膚電極を用いた経皮膚電気刺激治療を 2 週おきに 12 回施行する。本治療時の刺激条件は以下のとおりとする。</p> <p>&lt;刺激条件&gt;</p> <p>➤ 電気刺激群</p> <ul style="list-style-type: none"> <li>・電流強度 : 1.0 mA</li> <li>・パルス幅 : 10 ms/相 双極性</li> <li>・刺激頻度 : 20 Hz</li> <li>・刺激時間 : 30 分</li> </ul> <p>➤ シヤム群</p> <ul style="list-style-type: none"> <li>・電流強度 : 0 mA</li> <li>・パルス幅 : 0 ms/相 双極性</li> <li>・刺激頻度 : 0 Hz</li> <li>・刺激時間 : 30 分</li> </ul>                                                                                                                                                                                                                                                                                             |

|          |                                                                                                                                                                                                                                                                                                                                      |
|----------|--------------------------------------------------------------------------------------------------------------------------------------------------------------------------------------------------------------------------------------------------------------------------------------------------------------------------------------|
| 中止基準     | <ol style="list-style-type: none"> <li>1) 被験者から治験参加辞退の申し出や同意撤回があった場合。</li> <li>2) 治験登録後、被験者が対象として不適格であることが判明した場合。</li> <li>3) 合併症の増悪により治験の継続が困難な場合。</li> <li>4) 有害事象により治験の継続が困難な場合。</li> <li>5) 妊娠が判明した場合。</li> <li>6) 治験全体が中止された場合。</li> <li>7) その他の重大な治験実施計画書違反が判明した場合。</li> <li>8) 治験担当医師又は治験分担医師の判断により中止の必要性が認められた場合。</li> </ol> |
| 目標被験者数   | 50 例（電気刺激群 25 例、シヤム群 25 例）                                                                                                                                                                                                                                                                                                           |
| 治験実施期間   | 治験実施期間：1 年 10 ヶ月（2021 年 6 月 1 日～2023 年 3 月 31 日）<br>症例登録期間：10 ヶ月（2021 年 6 月 1 日～2022 年 3 月 31 日）                                                                                                                                                                                                                                     |
| 治験施設数    | 3 施設                                                                                                                                                                                                                                                                                                                                 |
| 倫理及び GCP | 本治験の実施に際しては「ヘルシンキ宣言」に基づく倫理的原則、「医薬品、医療機器等の品質、有効性及び安全性の確保等に関する法律（以下、「薬機法」という。）」、「医療機器の臨床試験の実施の基準に関する省令（以下、「医療機器 GCP 省令」という。）」及びその他の関連する規制要件を遵守するものとする。                                                                                                                                                                                 |
| 治験審査委員会  | 本治験の実施に先立ち、実施医療機関の治験審査委員会は、本治験の倫理的、科学的及び医学的妥当性を審査する。本治験は、治験審査委員会の承認を得た後に実施する。治験審査委員会の審議結果が「修正の上で承認する」であった場合には、審議結果に基づいて実施計画書又は症例報告書、同意説明文書等を修正した後、本治験を実施する。また、治験審査委員会は少なくとも 1 年に 1 回以上の頻度で本治験が適切に実施されているか否かを継続的に審査する。                                                                                                                |

## 1. 緒言

### 1.1. 治験の背景

網膜色素変性（以下、「RP」という。）は、視細胞及び網膜色素上皮細胞を原発とした進行性の広範な変性がみられる遺伝性の疾患群と定義され、多くは初期に杆体の変性が現れる。進行すると視細胞の錐体細胞にも変性がおよび、視力低下をきたし、やがて失明に至る。病型により異なるが、すべて両眼性進行性で、早いものでは40代に社会的失明状態になる。先天盲の第1位であり、2015年4月から2016年3月までに新規に視覚障害認定を受けた18歳以上の認定原因疾患のうち、1位の緑内障（28.6%）に次いで2位（14.0%）となっている。遺伝子異常によって起こり、多くは単一遺伝子疾患であり、関連する遺伝子が現在80種以上報告されている。常染色体優性（15~17%）、常染色体劣性（25~30%）、X連鎖性（0.5~1.6%）のいずれかの遺伝形式をとるが、家系内に他の発症者が確認できない孤発例（49~56%）が最多となっている。2015年1月1日より国が定める指定難病の一つに認定されている。発症頻度はわが国においては約4,000~8,000人に一人と推定されており、2016年の医療受給者証保持者数厚生労働省患者調査では26,245人と報告されている。

RP患者は健常者に比べて高い頻度で白内障や後発白内障、前嚢収縮、黄斑病変（黄斑浮腫、黄斑上膜、黄斑円孔）を合併し、それぞれの疾患に対して加療が行われるが、現時点ではRPに対する有効な治療法は無く、治療法の確立は非常に重要な問題である。

電気刺激は網膜神経節細胞に対して神経保護効果があることが基礎研究により報告<sup>1,2,3</sup>されている。網膜電気刺激を行うことによって、網膜内層におけるIGF-1の活性上昇<sup>4</sup>、BDNF（脳由来神経栄養因子）の発現増加<sup>5</sup>、CNTF（毛様体神経栄養因子）発現増加<sup>6</sup>、FGF1の発現増加<sup>7</sup>、IL-1b及びTNF- $\alpha$ の抑制<sup>8</sup>、Bax遺伝子のダウンレギュレーション<sup>6</sup>、グルタミン合成酵素分泌増加<sup>9</sup>、細胞内アデノシン1リン酸レベルの増加<sup>2</sup>、細胞シグナル伝達・代謝・構造・免疫学的因子関連タンパク質のアップレギュレーション<sup>10</sup>、IL-10発現増加に伴うIL-6・COX-2発現減少<sup>11</sup>、NF- $\kappa$ Bリン酸化減少<sup>11</sup>、小膠細胞由来のTNF- $\alpha$ 産生抑制<sup>12</sup>、脈絡膜血流増加<sup>13</sup>等、様々な機序によって網膜神経保護及び機能活性化を生じると報告されている。また臨床試験においても、網膜動脈閉塞患者に対して網膜電気刺激を行うことによって視力、網膜電図振幅、視野の改善を認めたとの報告が存在する<sup>14,15</sup>。ことから、皮膚電極を用いた経皮膚電気刺激治療はRPにより視力低下が進行している患者に対して視力の改善が期待される。

海外では既に小型のポータブル型の器械が商品化され、主に欧州ではRPや加齢黄斑変性等の網膜疾患を対象として、コンタクトレンズ型角膜電極を用いた電気刺激装置である“OkuStim<sup>®</sup>”が臨床に用いられているものの、国内では商品化されていない。また、TESの“OkuStim<sup>®</sup>”は、角膜上に電極を設置して電気刺激を行うため、操作は簡便ではあるが、ドライアイの有害事象が報告<sup>15</sup>され、電気刺激による角膜障害の危険性が指摘されている。それに対して、本研究で用いる電気刺激治療は、電極を皮膚に設置することで、角膜電極と比較しより低侵襲に、より簡便に電気刺激を行うことが出来ると考える。

千葉大学医学部附属病院眼科において、RP患者10例20眼を対象に2週間隔で6回の両頬と額に設置する皮膚電極を用いた経皮膚電気刺激（以下、「TdES」という。）治療を実施した「網膜色素変性を対象とした経皮膚電気刺激の安全性および有効性を検討する探索的試験（第Ⅱ相試験）（試験番号K29001）」において、重篤な有害事象の発現及び不具合等の発生はなかった。有害事象が4例（感冒4例、下痢1例、発熱1例）に発現したが、治験機器との因果関係は認められなかった。一方、有効性の検討においては、ETDRS視力が6週、10週及び12週時において0週時に比べ統計学的に有意な改善を示し、12週時

では平均で約 4 文字の改善を認めた。logMAR 視力においても 8 週時以降、0 週時に比べ統計学的に有意な改善を示した。静的視野検査での Mean Deviation 値（以下、「MD 値」という。）は改善傾向であり、12 週時において、0 週時との統計学的な有意差を認めた。

以上より、TdES によって logMAR 視力、ETDRS 視力、静的視野検査での MD 値が改善し、視力の低下を遅延させる可能性があることが示唆された。

さらに、第Ⅱ相試験被験者の長期に亘る過去データを採集し、視機能障害の進行速度及び過去データと治療効果との因果関係を調査する目的に、「網膜色素変性を対象とした経皮膚電気刺激の安全性および有効性を検討する探索的試験被験者の試験前データについての後向き研究」を実施した。その結果、logMAR 視力について最も有意かつ一定の速度で線形的に悪化していることが確認された。このことより、第Ⅱ相試験の選択基準に該当する患者層における視力の推移に関しては、電気刺激治療未介入下では有意かつ一定の速度で進行すると仮定できる。電気刺激治療介入前データを用いて線形回帰モデルで推定した値と、実際に電気刺激治療を行った場合の値との比較検討を行うことで、有効性を検証することが可能となる（この検討については別途附随研究として実施予定）。

本試験においては、24 週時における logMAR 視力（矯正小数視力から換算）の 0 週からの変化量における電気刺激群のシャム群に対する優越性を主要評価項目として、TdES による視機能の維持効果を検証し、シャム群を設定することで試験期間を通しての logMAR 視力の推移を検討する。また、皮膚電極を用いた本治療法は患者に対して侵襲性が低く、経済的にも負担の少ない治療法となる可能性があり、臨床上有用であると考えられることから、皮膚電極を用いた本治療法の開発を検討するに至った。

以上より、RP 患者における第Ⅱ相試験（試験番号 K29001）における有効性及び安全性についてシャム群に対する優越性を検証すること及びプラセボ効果を検討することを目的に、本試験を計画した。

## 1.2. 網膜色素変性に対する標準治療

RP には確立した治療法はない。残存視機能を活用する目的でロービジョンケアが行われる。その他にサプリメントや内服薬による内服治療が行われることがあるがいずれも効果に関しては明確な結論には至っておらず、内服や摂取のメリットとデメリットを患者と十分に相談したうえで使用されるのが望ましいと考えられる。このほか、白内障や黄斑浮腫等の合併症を治療することで視機能改善を見込む治療法もあるが、それらはあくまで合併症への治療にとどまる。

## 1.3. 試験機器の概要

### 1.3.1. 使用方法

電流刺激の強さ（電流量）及び時間（治療時間）をコントロールするほか、治療眼（右眼、左眼、両眼）の選択を行う。本体には、電気刺激で通電する電流の大きさ、通電時間等を表示する。皮膚電極はゲル状の粘着物質がある面を皮膚に接触し、反対の面にある突起に皮膚電極と本体を接続するケーブルを接続する。電極の装着場所は、両眼の下眼瞼耳側及び前額部の中央に装着する。

ゲル状パッドの電極は、家庭向け低周波治療器に使用されるディスクポータブルな電極に類似する。大きさは 19×38 mm 程度で、ゲル状の粘着物質がある面を皮膚に接触し、反対の面にある突起に電極と機器を接続するケーブルを接続し、皮膚を經由して電気刺激が行われる。電極の装着場所は、両眼の下眼瞼耳側及び前額部の中央に装着する（右図）。

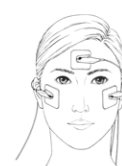

電極装着図



### 1.3.2. 非臨床成績

当該機器に使用する電極パッドが健全な皮膚に接触することから、生物学的安全性について担保が求められる。電極パッドの製造業者である積水化成工業株式会社の生物学的試験データによると、生体用ハイドロゲル（テクノゲル CR・SR<sup>®</sup>）には、生体安全性関連の有害事象はないとされており、心電図用電極、脳波用電極、生体センサー、電気治療器用電極などに使用されている。試験データの概要を以下に記す。

#### 【生物学的試験データ（SRA240/80-09S）】

1) 以下の規格に基づいて生物学的試験が実施された。

| 試験                   | 規格及び試験方法                                                                                                                                |
|----------------------|-----------------------------------------------------------------------------------------------------------------------------------------|
| 細胞毒性試験               | ISO 10993-5:2009 - 医療機器の生物学的評価 Part 5: 細胞毒性試験: in vitro 法                                                                               |
| 感作性試験                | ISO 10993-10:2010 - 医療機器の生物学的評価 Part 10: 刺激性及び遅発性過敏性の試験 (section 7.2)<br>ISO 10993-12:2012 - 医療機器の生物学的評価 Part 12: 試料調製及び対象物質            |
| 皮膚一次刺激性試験            | ISO 10993-10:2010 - 医療機器の生物学的評価 Part 10: 刺激性及び遅発性過敏性の試験 (section 6.3)                                                                   |
| 河合法<br>「24時間開放性塗布試験」 | 被験者 20 名の上腕内側部に試料を 24 時間塗布し、塗布位置を観察する。肉眼的に異常のないものはレプリカ標本を作製し全視野を顕微鏡観察し、刺激性の有無及び強度を判定する。皮膚表面の微細な形態変化（B 刺激、C 刺激）から紅斑のような炎症反応（D 刺激）まで判定する。 |

2) 結果概要（SRA240/80-09S）

| 試験方法                       | 結果                           |
|----------------------------|------------------------------|
| L929 細胞を用いた細胞毒性試験 非接触（寒天）法 | 細胞毒性なし                       |
| マウスを用いた局所リンパ節アッセイ          | 陰性                           |
| ウサギを用いた皮膚 1 次刺激性試験         | P.I.I.=0, 刺激性なし              |
| 河合法「24時間開放性塗布試験」           | 3B-0C-0D、準陽性とヒトに対する刺激性は極めて弱い |

### 1.3.3. 臨床試験成績

#### 1.3.3.1. 国内臨床成績

緒言に記載しているとおり、千葉大学医学部附属病院眼科において、RP 患者 10 例 20 眼を対象とした「網膜色素変性を対象とした経皮膚電気刺激の安全性および有効性を検討する探索的試験（第 II 相試験）」（試験番号 K29001）が実施されており、安全性及び有効性が示唆されている。

#### 1.3.3.2. 海外臨床試験成績

海外では、ドイツが Okuvision 社製 OkuStim<sup>®</sup>を、アメリカが ScyFix 社製 ScyFix700<sup>®</sup>を電気刺激治療器として販売している。角膜電極を用いた網膜電気刺激に関する文献の要旨を以下に示す。

|                            |                                                                                                                                            |
|----------------------------|--------------------------------------------------------------------------------------------------------------------------------------------|
| Schatz A 他 <sup>14</sup>   | RP24 例に TES 週 1 回 30 分 6 回、安全性及び忍容性に問題なし、有効性：視野と暗順応 b 波が有意に改善。                                                                             |
| Schatz A 他 <sup>15</sup>   | RP52 例、週 1 回 30 分 1 年間、安全性結果：安全性：一過性ドライアイ症状（52 人中 31 人）、他に臨床的に有意な有害事象なし。有効性結果：明順応 b 波が有意に改善、暗順応 b 波振幅が改善傾向。                                |
| Bittner AK 他 <sup>16</sup> | 2.4~3 年にわたり TES を 3~6 回受けた網膜色素変性患者 3 例、安全性：治療と関連ある有害事象なし、有効性：中心視機能の改善を TES 後約 4~7 週間後に繰り返し認め、その後ベースラインに回帰し、かつベースラインを超えて視機能が大幅に低下することはなかった。 |

#### 1.3.4. 予想される有害事象及び不具合等

使用する電流量からは有害事象が発生する可能性は低いと推測されるが、電極装着部位に一致した皮膚炎や角膜障害が生じる可能性がある。また電気刺激による電極装着部位付近の皮膚に刺激感を感じる事が予測される。医療機器の不具合情報に加えて、不適切な使用方法（未熟な手技）による不具合情報も含める。なお、これらの事象は、第Ⅱ相試験（試験番号 K29001）においては発現しなかった。

## 2. 治験の目的と治験実施の妥当性

### 2.1. 目的

網膜色素変性患者に対する、皮膚電極を用いた経皮膚電気刺激による視機能の維持・改善効果及び安全性をシャム群と比較し検証する。

### 2.2. 本治験実施の妥当性

RP には標準治療法がないことから、RP 患者に対する、皮膚電極を用いた経皮膚電気刺激による治療後の視機能への有効性及び安全性を確認することは臨床上必要と考えられる。

## 3. 対象患者

以下の選択基準のすべてを満たし、除外基準のいずれにも該当しない患者を治験登録適格例とする。

### 3.1. 選択基準

以下のすべての条件に該当する患者を対象とする。ただし、2)～4) に関しては評価眼に関して、以下の基準を満たすこと。

- 1) 同意取得時の年齢が 20 歳以上 80 歳未満の定型網膜色素変性患者
- 2) 信頼性（固視不良率 20 % 未満、偽陽性率 15 % 未満、偽陰性率 33 % 未満）のある静的視野検査（HFA）10-2 プログラムの計測値を示す患者
- 3) 小数視力が 0.1～0.7 の患者
- 4) 静的視野検査（HFA）10-2 プログラム MD（Mean Deviation：MD）値が -10 dB 未満の患者
- 5) 本治験の参加にあたり十分な説明を受けた後、十分な理解のうえ、本人の自由意思による文書同意が得られた患者
- 6) 2 週おきに 24 週間の通院が可能でかつ、36 週及び 48 週の後観察の通院が可能な患者
- 7) 治験期間中に適切な避妊措置を実施することが可能な患者

#### 【設定根拠】

RP は両眼進行性の疾患であり、初期は比較的視力が保たれているが、増悪すると失明する。このため、本治験機器の性能が検出可能な、視力が中等度～重度の間の中間層の患者を対象とするため。

- 1) 診断基準に基づいて設定した。
- 2, 3, 4) 種々の評価項目が正確に行えるようにするため。
- 5) 「ヘルシンキ宣言」に基づく倫理的原則、薬機法、医療機器 GCP 省令及びその他の関連する規制要件を遵守して治験を実施するため。

6, 7) 本治験を完遂出来ると考えられる患者であり、かつ女性が参画しやすくするため。

### 3.2. 除外基準

以下のいずれかの条件に該当する患者は対象としない。ただし、2), 5), 6)に関しては評価眼に関して以下のいずれかの条件に該当する患者は対象としないこと。

- 1) 過去に眼疾患に対する電気刺激治療を受けたことのある患者
- 2) 3ヶ月以内に内眼部手術を受けている患者
- 3) スクリーニング前31日以内にイソプロピルウノプロストン・カルシウム拮抗薬・暗順応改善薬の用量・用法を変更した患者
- 4) 治験期間中に使用する予定の薬剤（散瞳薬、点眼麻酔薬等）に対し、薬剤アレルギーの既往のある患者
- 5) 評価眼の視機能に重大な影響を及ぼす合併症を有する患者：硝子体黄斑牽引症候群、黄斑浮腫、黄斑前膜、後部ぶどう腫を伴う強度近視などの黄斑病変、糖尿病網膜症、外眼部の炎症、感染症、重度のドライアイ、網膜中心動脈閉塞症、後部虚血性視神経症、視神経疾患の既往、中等度以上の核白内障、視力に重大な影響を及ぼす前囊下及び後囊下白内障、後発白内障
- 6) 直近3年間の視力、OCT所見、視野検査での視野感度のいずれも全く悪化が見られない患者。ただし、組み入れ時の参考資料として他院のデータを使用可とする
- 7) ペースメーカーもしくは除細動器が植え込まれている患者
- 8) 悪性腫瘍の既往又は合併のある患者。ただし、既往はあるが5年以上再発していない患者は登録可とする
- 9) 認知症、精神疾患と診断され治療中の患者
- 10) 血糖コントロールが著しく不良な糖尿病（HbA1c(NGSP) > 10.0%）を合併している患者
- 11) 内服治療をしてもコントロール困難な高血圧症（収縮期 $\geq$ 180 mmHg、かつ/又は、拡張期 $\geq$ 110 mmHg）の患者
- 12) スクリーニング時の臨床検査で、下記のいずれかに該当する肝・腎機能障害が認められる患者
  - ・ AST、ALT：（施設）基準値上限の3倍超
  - ・ 血清クレアチニン：（施設）基準値上限の1.5倍超
- 13) 妊娠、授乳中（授乳を中止する場合も含む）又は本治験中に妊娠を希望している患者
- 14) 現在、他の治験に参加している患者
- 15) その他、治験責任医師又は治験分担医師が本治験の参加の対象として不適当と判断した患者

#### 【設定根拠】

- 4, 7, 8, 9, 10, 11, 12, 13) 対象患者の安全性を考慮するため。
- 4) 被験者にアナフラキシーショック等のアレルギー反応が起こる危険性を排除するため。
- 7) 電気刺激装置から発生する微弱電流が体内に植え込まれているペースメーカーもしくは除細動器の作動を狂わせ被験者の健康に悪影響を与える可能性があるため。
- 8) 悪性腫瘍の既往又は合併のある患者は再発に対する経過観察が必要なため。なお、5年以上再発していない場合は寛解と判断されるため組み入れ可とする。

- 1  
2  
3  
4  
5  
6  
7  
8  
9  
10  
11  
12  
13  
14  
15  
16  
17  
18  
19  
20  
21  
22  
23  
24  
25  
26  
27  
28  
29  
30  
31  
32  
33  
34  
35  
36  
37  
38  
39  
40  
41  
42  
43  
44  
45  
46  
47  
48  
49  
50  
51  
52  
53  
54  
55  
56  
57  
58  
59  
60
- 9) 認知症、精神疾患と診断され治療中の患者は、対象者の来院等に伴う基礎疾患のリスクを考慮する必要があるため。
- 10) 血糖コントロールが著しく不良な糖尿病（HbA1c(NGSP) > 10.0%）を合併している患者は、糖尿病の治療のために医師から入院を勧められる状態にあるため。
- 11) III度高血圧であり、脳心血管病リスクが最も高い症例であり、数週間以内に速やかに高圧目標を達成する必要があり、放置すると治験中の脳心血管死を招く恐れがあるため。
- 12) AST、ALT が CTCAE Grade 2 以上に相当し肝障害が疑われるため。血清クレアチニンは CTCAE Grade 1 以上に相当し腎障害が疑われるため。
- 13) 本電気刺激療法の胎児・新生児への影響に関する動物実験がなく影響が不明なため。
- 1, 2, 3, 5, 6, 14, 15) 対象患者の正確な有効性を評価するため。
- 1) 電気刺激群では「フォスフェン」や「頬の弱いピリピリ感」を感じ、シヤム群では何も感じないため、バイアスがかかるため除外する。
- 2) 3 ヶ月以内に内眼部手術を受けている場合は視機能に手術の影響が残っている恐れがあり対象患者の正確な有効性を評価するのが難しいため。
- 3) スクリーニング前 31 日以内にイソプロピルウノプロストン・カルシウム拮抗薬・暗順応改善薬の用量・用法を変更した場合、薬剤の影響が安定していないため、信頼性のあるベースライン値が測定できない可能性があるため。
- 5) 合併症による視機能障害と網膜色素変性による視機能障害が分離できず対象患者の正確な有効性を評価できないため。
- 6) 直近 3 年の網膜色素変性が安定期にあり、視機能の変化が得られない可能性があるため。
- 14) 他の治験が本治験の成績に影響を及ぼす恐れがあるため。
- 15) 治験責任医師又は治験分担医師により、対象患者の前歴や行動により正確な有効性を評価することが困難と判断される可能性があるため。

## 4. 被験者の同意

### 4.1. 同意文書及びその他の説明文書の作成並びに改訂

治験責任医師は、被験者から治験参加の同意を得るために用いる同意文書及びその他の説明文書を可能な限り平易な表現で作成する。また、同意文書及びその他の説明文書を改訂する必要があると認めた場合は、これらを改訂する。

治験責任医師は、作成又は改訂された同意文書及びその他の説明文書を治験審査委員会に提出し、その承認を得る。

### 4.2. 同意取得の時期と方法

#### 1) 同意の取得

治験責任医師又は治験分担医師は、治験審査委員会の承認を得た同意文書及びその他の説明文書を被験者に手渡し、「4.3 被験者に対する説明事項」に示す内容について十分な説明を行う。また、必要な場合には、治験協力者も被験者に補足的な説明を行う。被験者が治験の内容を良く理解したことを確認した上で、前観察期間（スクリーニング）検査を実施するまでに文書で自由意思による同意を取得する。

#### 2) 説明時の被験者への対応

治験責任医師又は治験分担医師は、同意を得る前に被験者が質問をする機会と当該治験に参加するか否かを判断するのに十分な時間を与え、被験者の質問に対しては、被験者が満足するように回答する。

#### 3) 同意書への記入方法及び説明文書の交付

被験者の同意に際しては、説明を行った治験責任医師又は治験分担医師が記名押印又は署名し、説明した日付を記入する。被験者は同意書に記名押印又は署名し、同意した日付を記入する。なお、治験協力者が補足的な説明を行った場合は、当該治験協力者も記名押印又は署名し、説明した日付を記入する。同意を得た後、説明文書及び同意書の写しを被験者に交付する。

#### 4) 説明文書改訂時

治験責任医師又は治験分担医師は、被験者の同意に関連し得る新たな情報の入手等により同意文書及びその他の説明文書を改訂した場合、その都度、被験者に対して改訂された同意文書及びその他の説明文書を用いて改めて説明し、治験への参加継続について被験者から文書で自由意思による再同意を取得する。なお、被験者の同意に影響を与えうる新たな重要な情報が得られた場合には、直ちに当該情報を被験者に提供し、これを文書により記録するとともに、被験者が治験に継続して参加するかどうかを確認する。

#### 4.3. 被験者に対する説明事項

治験責任医師が作成する説明文書には、以下の事項を記載する。

- 1) 当該治験が研究を伴うこと
- 2) 治験の目的
- 3) 治験責任医師の氏名、職名及び連絡先
- 4) 治験の方法
- 5) 予期される臨床上の利益及び危険性又は不便
- 6) 被験者に対する他の治療方法の有無及びその治療方法に関して予測される重要な利益及び危険性
- 7) 被験者の治験に参加する予定期間
- 8) 治験への参加は被験者の自由意思によるものであり、被験者は治験への参加を随時拒否又は撤回することができること。また、拒否・撤回によって被験者が不利な扱いを受けることはないこと、治験に参加しない場合にうけるべき利益を失うことはないこと
- 9) モニター、監査担当者、治験審査委員会及び規制当局が医療に係る原資料を閲覧できること。その際、被験者の秘密は保全されること
- 10) 治験の結果が公表される場合であっても、被験者の秘密は保全されること
- 11) 治験に関連する健康被害が発生した場合に被験者が受けることのできる補償及び治療
- 12) 治験への参加継続について被験者の意思に影響を与える可能性のある情報が得られた場合には速やかに被験者に伝えられること
- 13) 治験への参加を中止させる場合の条件又は理由
- 14) 治験に関し被験者が負担をする費用
- 15) 治験に関し被験者に金銭等が支払われる場合にはその内容（支払額算定の取決め等）
- 16) 被験者が治験及び被験者の権利に関してさらに情報がほしい場合又は治験に関連する健康被害が生じた場合に照会すべき又は連絡をとるべき医療機関の相談窓口
- 17) 被験者が守るべき事項
- 18) 当該治験の適否等について調査審議を行う治験審査委員会の種類、各治験審査委員会において調査審議を行う事項その他当該治験に係る治験審査委員会に関する事項
- 19) 知的財産
- 20) 利益相反

## 5. 治験の方法

### 5.1. 治験のデザイン

本治験は、網膜色素変性患者に対する、皮膚電極を用いた経皮膚電気刺激による視機能の維持・改善効果及び安全性を検証するランダム化、二重遮蔽、シヤム対照、多施設共同試験である。

本治験のデザインは以下のとおりである。

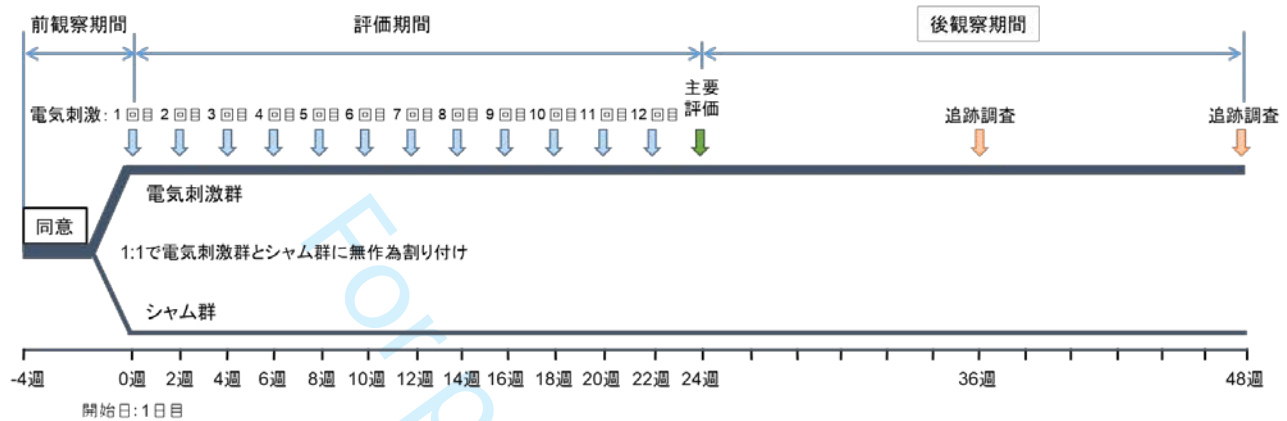

#### <刺激条件>

##### ➤ 電気刺激群

- ・ 電流強度：1.0 mA
- ・ パルス幅：10 ms/相 双極性
- ・ 刺激頻度：20 Hz
- ・ 刺激時間：30 分

##### ➤ シヤム群

- ・ 電流強度：0 mA
- ・ パルス幅：0 ms/相 双極性
- ・ 刺激頻度：0 Hz
- ・ 刺激時間：30 分

#### 【設定根拠】

刺激条件は「網膜色素変性を対象とした経皮膚電気刺激の安全性および有効性を検討する探索的試験（第Ⅱ相試験）（試験番号 K29001）」において安全性が示唆され、logMAR 視力、ETDRS 視力及び静的視野検査で有効性の認められた条件と同じに設定した。

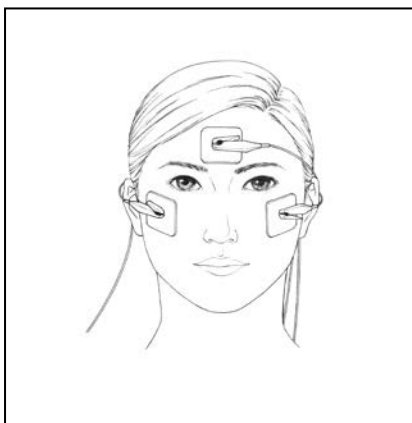

#### <刺激方法>

電気刺激群及びシヤム群における対象患者の前額部の中央及び両眼の下眼瞼耳側の皮膚に電極を装着し（左図参照）、電気刺激群のみ電気刺激装置から電極を通して電気刺激を行う。電流表示液晶ディスプレイは被験者から見えないように遮蔽等の措置を講じること。

シヤム群では皮膚電極を所定の位置に装着し、コードを接続した後、機器の電源を入れる。通電する電流量は0 mAとし、スタートボタンを押して30分間のタイマーを開始する。

TDES 実施日を記載する。

## 5.2. 目標被験者数と治験実施期間

50 例（電気刺激群 25 例、シヤム群 25 例）

主要評価項目は片眼（両眼とも選択・除外基準に適合する場合は右眼とする）とする。

治験実施期間：1 年 10 ヶ月（2021 年 6 月 1 日～2023 年 3 月 31 日）

症例登録期間：10 ヶ月（2021 年 6 月 1 日～2022 年 3 月 31 日）

## 5.3. 施設登録

施設登録は、千葉大学医学部附属病院 臨床試験部 データマネジメント室で行う。

### 5.3.1. 施設登録

- 1) 治験責任医師は、当該施設の治験審査委員会で承認が得られた後、治験審査委員会の承認通知書の写し及び施設登録依頼書を FAX する。
- 2) 千葉大学医学部附属病院 臨床試験部 データマネジメント室は、施設登録を行い、施設登録完了通知書を治験責任医師に送付し、大阪大学医学部附属病院 未来医療開発部 データセンターへ施設登録が完了した旨を報告する。

### 5.3.2. 施設登録先

千葉大学医学部附属病院 臨床試験部データマネジメント室

受付 FAX 番号：043-222-1207

問合せ電話番号：043-222-1206

※ 受付時間は月～金の 9:00～17:00（土日、祝日、年末年始を除く。）

※ 受付時間外に FAX を受信した場合は、翌稼働日の受付とする。

## 5.4. 症例登録

症例登録は、大阪大学医学部附属病院 未来医療開発部 データセンターにおける中央登録制とする。

### 5.4.1. 症例登録・割付

- 1) 治験責任医師又は治験分担医師は、文書による同意を取得し、スクリーニング検査の結果、被験者が選択基準を満たし、除外基準に抵触していないことを確認する。治験責任医師又は治験分担医師が「適格」と判断した被験者について、治験責任医師、治験分担医師又は治験協力者は指定された URL にアクセスし、Web サイト上で必要な情報を入力の上、症例登録及び割付を行う。
- 2) 治験責任医師又は治験分担医師は、適格性判定を画面上で確認し、適格と判定されたことを確認する。割付結果は unblind staff のみが確認できる。

一度登録された被験者の登録取り消しはされない。治験責任医師又は治験分担医師は、誤登録が判明した際には速やかに大阪大学医学部附属病院未来医療開発部データセンターに連絡する。

※ 治験責任医師又は治験分担医師は、被験者の登録もしくは割付がなされるまでプロトコル治療をしてはならない。



#### 5.4.2. 症例登録先

大阪大学医学部附属病院 未来医療開発部 データセンター

Mail : [epico-sr@dmi.med.osaka-u.ac.jp](mailto:epico-sr@dmi.med.osaka-u.ac.jp)

※ 受付時間は月～金の 9:00～17:00（土日、祝日、年末年始を除く。）

症例登録 Web サイト（DATATRAK Enterprise Cloud）

URL : <https://secure.datatrak.net>

※ 土日祝を含む 365 日、24 時間入力可能（保守点検等によるシステム停止時間を除く。）

#### 5.4.3. 割付調整因子

割付調整因子は、矯正小数視力（0.3 以下、0.4 以上）とし、割付方法は動的割付とする。

#### 5.4.4. 割付情報の管理

割付責任者及び割付担当者は、割付情報を症例登録システムで作成し、管理する。

### 5.5. 遮蔽化

本治験は電気刺激群及びシャム群に対する二重遮蔽デザインを用いて実施する。電気刺激装置の通電操作のみを実施するスタッフ（治験分担医師、治験コーディネーター：unblind staff）を置き、unblind staff のみが無作為化コードを確認できる。電気刺激装置の通電操作以外の規定検査、評価を実施する治験責任医師、治験分担医師、治験協力者（視能訓練士、治験コーディネーター）には通電の有無に関する情報、通電時の被験者の状態等を含めた情報を遮断することにより盲検性を確保し、被験者にはシャム施術及び電気刺激装置の遮蔽等治療の盲検性を最大限確保する措置を実施する。治験調整医師、治験責任医師、治験分担医師、治験コーディネーター及び治験のモニタリング等を行うその他のスタッフに対して、無作為化コードは開鍵後まで知らされない。

### 5.6. コードの開鍵

無作為化コードは、データ固定後に開封する。

### 5.7. 緊急コード開封の手続き

治験機器との因果関係が否定できない重篤な有害事象が発現し、被験者の安全性確保のため緊急コードの開封が必要であると治験責任医師が判断した場合には、治験調整医師の同意を得た上で治験責任医師は当該被験者の割付群を unblind staff より確認する。治験責任医師が緊急時の緊急コードを開封した場合、治験責任医師は実施医療機関の長及び割付責任者に連絡を行う。

### 5.8. 登録されなかった被験者の取り扱い

登録において、不適格等の何らかの理由で登録が行われなかった被験者は、治験の登録症例には含めない。治験責任医師又は治験分担医師は、当該被験者に本治験への登録が不可である旨を説明する。

## 5.9. 個々の症例の中止基準

以下の基準に該当した場合、治験責任医師又は治験分担医師は治験機器施行を中止する。検査スケジュール記載の中止時検査・評価を実施する。なお、電話等により被験者から連絡を受けた場合にも状況に応じて症例の継続・中止を判断することが出来る。その場合、中止時検査・評価は被験者の状態等を考慮の上、実施可能な時期に設定する。

- 1) 被験者から治験参加の辞退の申し出や同意撤回があった場合。
  - 2) 治験登録後、被験者が対象として不適格であることが判明した場合。
  - 3) 合併症の増悪により治験の継続が困難な場合。
  - 4) 有害事象により治験の継続が困難な場合。
  - 5) 妊娠が判明した場合。
  - 6) 治験全体が中止された場合。
  - 7) その他の重大な治験実施計画書違反が判明した場合。
  - 8) 治験担当医師又は治験分担医師の判断により中止の必要性が認められた場合。
- ・ 治験責任医師又は治験分担医師は中止日、中止理由等の必要事項を記録する。また、中止時の規定項目を可能な範囲で行う。
  - ・ 2)、7)以外は治験が中止された場合の「中止日」は、中止の理由となる事象が発現した日又は判明した日ではなく、治験責任医師又は治験分担医師が中止を判断した日とする。
  - ・ 治験責任医師又は治験分担医師は、治験機器施行開始後に中止基準に該当する被験者が判明した場合には、当該被験者にその旨を説明して治験を中止し、適切な処置を行う。
  - ・ 治験機器との因果関係が否定出来ない有害事象については、原則として症状が回復又は軽快するまで可能な限り観察継続する。

## 5.10. 併用可能薬及び併用可能療法

併用薬は指定しない。併用療法については、評価眼に対する眼科手術を行う必要が生じた際には、当該被験者の治験を中止とする。

## 5.11. 併用禁止薬及び併用禁止療法

- ・ 他の治験薬、治験製品及び治験機器

## 5.12. 併用制限薬

スクリーニング前 31 日以内から治験終了まで、以下の用量・用法を変更しない。

- ・ カルシウム拮抗薬の内服
- ・ 暗順応改善薬（アダプチノール®）の内服
- ・ イソプロピルウノプロストン製剤

## 5.13. 治験中止後の対応

治験を中止した被験者には、必要な検査・観察を実施し、必要に応じて適切な処置を講じる。

## 6. 治験機器

### 6.1. 外観及び構成

電気刺激装置、皮膚電極（エールローデ®、積水化成品工業株）及びこれらを接続する電極接続ケーブルで構成されている。

#### 1. 本体

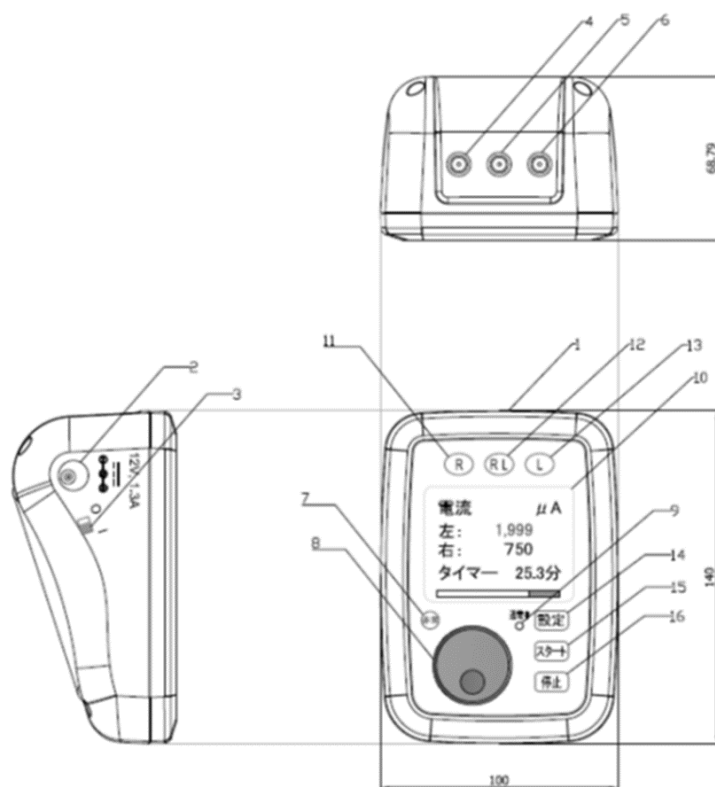

|    |              |    |              |    |                |    |               |
|----|--------------|----|--------------|----|----------------|----|---------------|
| 1  | 本体           | 2  | ACアダプタジャック   | 3  | 電源スイッチ         | 4  | 電極コネクタ (R)    |
| 5  | 電極コネクタ (COM) | 6  | 電極コネクタ (L)   | 7  | 非常停止ボタン        | 8  | ダイヤル          |
| 9  | 通電中ランプ       | 10 | 液晶ディスプレイ     | 11 | ボタンスイッチ (R)    | 12 | ボタンスイッチ (R+L) |
| 13 | ボタンスイッチ (L)  | 14 | ボタンスイッチ (設定) | 15 | ボタンスイッチ (スタート) | 16 | ボタンスイッチ (ポーズ) |

#### 2. 電極パッド（エールローデ®）



#### 3. 電極リード線



## 6.2. 安全装置

装置には、非常停止ボタンを装備している。

## 6.3. 作動原理

機器は、AC アダプタから電源が供給される。AC アダプタは商用交流電源（100 VAC, 50/60 Hz）から直流 12 V の電源（DC 12 V）が生成される。AC アダプタはスイッチング方式で交流から所定の直流が生成される。スイッチング方式は、以下の過程を経て直流が生成される。

- 1) 100 VAC をダイオードブリッジ整流器で正側に波が整流されコンデンサで平滑化される。
- 2) 高周波トランスで 1 次側が高速で on/off スwitching された電流が 2 次側に出力される。
- 3) 整流ダイオードを経て平滑化されて直流電源が出力される。

スイッチング方式は、回路構成が複雑であるが高耐圧部品により構成されている。電気的安全性試験で求められる耐圧試験にはスイッチング方式の方が性能的に優位であり、本装置で使用されている AC アダプタもスイッチング方式によるものである。

CPU 回路では、6 個の設定を行うボタンスイッチ及び非常停止ボタンが押されたかどうかの状況の有無からの入力と、ダイヤルが時計回り／反時計回りに回転された状態の入力から、CPU に書き込まれたファームウェアにより、プログラムが実行される。プログラムの実行状況やボタンスイッチ及びダイヤルの状況は 2.8 インチ、240(RGB)×320 解像度の液晶ディスプレイに表示される。CPU は 25 MHz 及び 32.768 kHz の水晶発振器によって正確なクロックで制御されている。

通電する電流は、オペアンプ及び FET トランジスタで定電流回路と 12 ビット DAC（デジタル・アナログ変換回路）によって電流量が正確に制御される。

正負両極刺激は論理回路により On/Off の情報がフォトカプラに入力され、光絶縁されて患者に電極が接続されている 3 個のソケットに出力される。

電気刺激を行うための電源は、直流 12 V を DC-DC（昇圧型 DC-DC 変換モジュール回路）に入力し、100 V の直流電圧が出力される。それをコンデンサにより平滑化して直流 100 V が生成される。

## 6.4. 品質

有限会社メイヨー稲沢研究所は、当局が定めた QMS 省令に適合している事業所であると認定されており、医療機器登録製造所の認可を受けている。また、認証機関である株式会社コスモス・コーポレーション（認証機関番号：AG）により、認証を受けたすべての医療機器に対して、QMS 定期調査により適合を認定されている。治験機器に対しては ISO14971 に従ってリスクマネジメントを実施し、当該治験機器においても品質は担保されている。

### 6.4.1. 安全性

当該治験機器は、以下の電氣的安全性に関する医療機器の JIS 規格に適合するように設計されている。

| 規格番号            | 標題                                                     |
|-----------------|--------------------------------------------------------|
| JIS T 0601-1    | 医用電気機器-第 1 部：基礎安全及び基本性能に関する一般要求事項                      |
| JIS T 0601-1-2  | 医用電気機器-第 1-2 部：基礎安全及び基本性能に関する一般的要求事項-副通則：電磁妨害-要求事項及び試験 |
| JIS T 0601-2-10 | 医用電気機器-第 2-10 部：神経及び筋刺激装置の基礎安全及び基本性能に関する個別要求事項         |

基本的な電氣的安全性試験とされている耐電圧試験、漏れ電流試験、低抵抗試験及び消費電力については、規格の要求事項に適合しており患者の安全性を担保すると考える。安全性試験においては量産機について実施予定である。本治験時には、JIS T0601-1 及び JIS T0601-1-2 に適合している付属の AC アダプタを使用し、電磁的影響に関し他の電子機器から電磁的な影響を受けない、また与えないような空間距離を担保する等安全対策を講じたうえで実施する。

使用する電流量からは有害事象が発生する可能性は低いと推測されるが、電極装着部位に一致した皮膚炎や角膜障害が生じる可能性がある。また電気刺激による電極装着部位付近の皮膚に刺激感を感じる事が予測される。

### 6.4.2. 性能

医療機器の JIS 規格 T0601-2-10 で要求される精度を含めて以下に表示する。

- ・ 電流値： 0~2,000  $\mu$ A (精度 定格出力 0~ $\pm$ 20%)
- ・ 刺激頻度： 20 Hz (精度 $\pm$ 1%)
- ・ 出力波形： 正負両相
- ・ パルス幅： 各相 10 msec (精度 $\pm$ 1%)

### 6.4.3. 製造

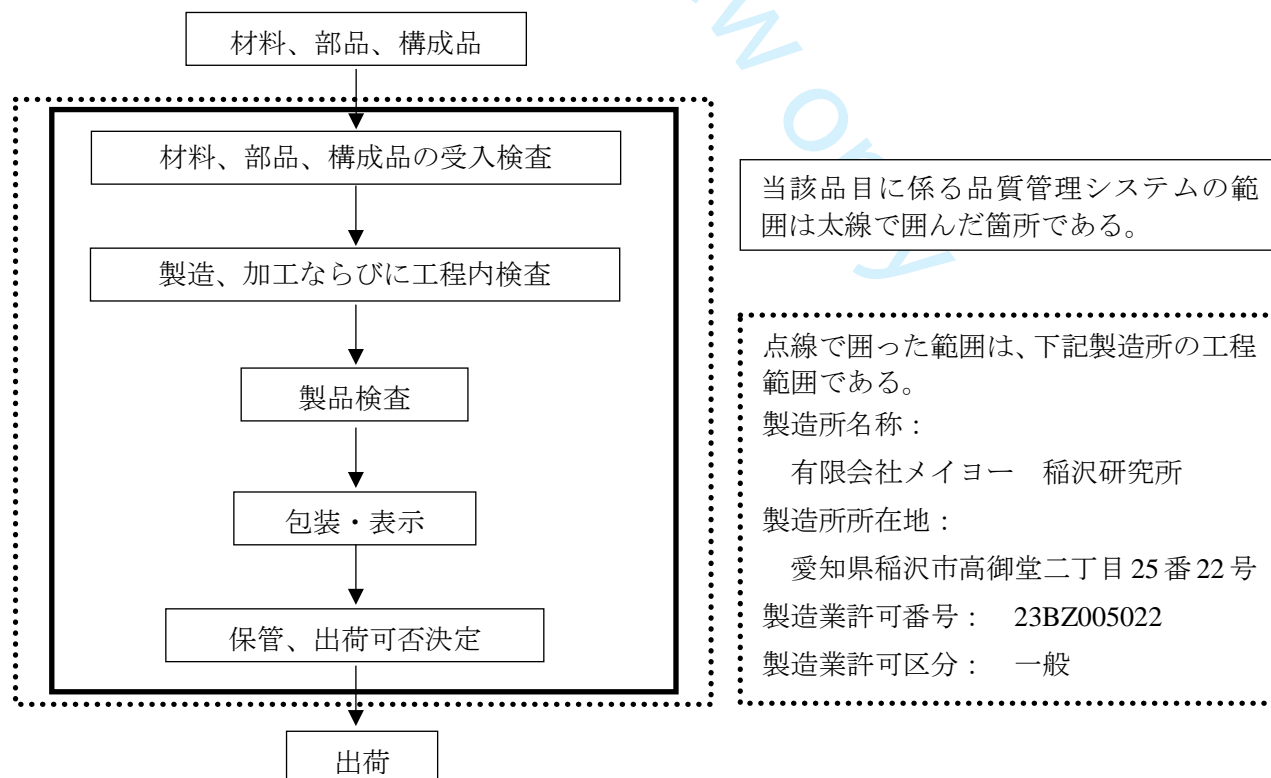

## 6.5. 包装・表示

< 治験機器ラベル（見本） >

治験用

経皮膚電気刺激装置（型番号記載）

< 注意 >

- ・ 未使用機器は破棄せずに保管して治験機器提供者に返却してください。
- ・ 治験以外には絶対使用しないでください。

< 保存条件 > 高温、多湿、直射日光を避けて保管すること。

治験調整医師：山本 修一

職名：特任教授

住所：千葉県千葉市中央区亥鼻 1-8-1

製造番号：

ラベルには治験調整医師の職名及び経皮膚電気刺激装置の製造番号を記載する。

## 6.6. 管理方法

- 1) 治験調整医師は治験開始後速やかに治験機器を実施医療機関の治験責任医師へ交付する。
- 2) 治験実施医療機関の治験機器管理者は、治験責任医師から実施医療機関の長を通じて提供された手順書に従って、治験機器を室温にて適切に管理する。
- 3) 治験責任医師は、治験機器の供給される保存条件、使用期限等取扱い方法を説明した文書を作成し、これを実施医療機関の長、治験分担医師、治験協力者、治験機器管理者等に交付する。
- 4) 治験責任医師及び治験分担医師は、治療を行う機器番号を確認し、治療中以外も含め治療機器に不具合が生じた場合は、その機器番号と不具合の状況を報告し、交換・修理が必要な場合は速やかに対応する。



- 1 a) スクリーニングと評価期 0 週の検査を同日に実施する場合、重複する検査についてはスクリーニング検査の結果を評価期 0 週の検査結果として使用可能。
- 2 b) 同意取得と登録までの期間が 31 日間を超えた場合は、再同意を文書で取得し再度スクリーニング検査を実施し登録可能とする。
- 3 c) 自覚症状（角膜炎、皮膚炎の他、前眼部・中間透光体の評価、顔面神経や三叉神経、鼻への影響も確認）は TdES 実施前と実施直後に実施する。
- 4 d) 血圧は、スクリーニング時に測定し、それ以外は必要に応じて測定する。
- 5 e) 臨床検査項目は、AST(GOT)、ALT(GPT)、ALP、総ビリルビン、BUN、血清クレアチニン、HbA1c、赤血球、白血球、ヘモグロビン、血小板とする。
- 6 f) 前観察期間の静的視野検査（HFA）10-2 プログラムは、計測値の信頼性（固視不良率 20 %未満、偽陽性率 15 %未満、偽陰性率 33 %未満）を確認する。信頼性
- 7 が確認できなかった場合は再測定するか、同意取得時 6 ヶ月以内の自施設での計測値を使用可とする。静的視野検査（HFA）は 10-2 プログラムとエスターマン
- 8 テスト（100 点）を実施する。
- 9 g) 光干渉断層計は、エリプソイドゾーン（EZ）長、中心窩下の厚み（中心窩網膜厚）を計測・数値化する。電気刺激の網膜への安全性も確認する。検査は散瞳後
- 10 実施する。
- 11 h) 眼底検査は散瞳後実施する。
- 12 i) 有害事象とは副作用等好ましくないすべての事象のことで、治療との因果関係は問わない。
- 13
- 14
- 15
- 16
- 17
- 18
- 19
- 20
- 21
- 22
- 23
- 24
- 25
- 26
- 27
- 28
- 29
- 30
- 31
- 32
- 33
- 34
- 35
- 36
- 37
- 38
- 39
- 40
- 41
- 42
- 43
- 44
- 45
- 46



### 7.1.1. スクリーニング検査

同意取得後、スクリーニング検査を開始する。治験責任医師又は治験分担医師は以下のスクリーニング検査を行い、選択基準を満たし、除外基準に抵触しない患者を被験者とする。検査項目は以下に記載のとおりとし、眼の検査に関しては両眼について実施し評価眼を決定する。

1) 自覚症状

※角膜炎、皮膚炎の他、前眼部・中間透光体の評価、顔面神経や三叉神経、鼻への影響も確認する。

2) 血圧

3) 臨床検査（採血）

※AST(GOT)、ALT(GPT)、ALP、総ビリルビン、BUN、血清クレアチニン、HbA1c、赤血球、白血球、ヘモグロビン、血小板数を測定する。

4) logMAR 視力（矯正小数視力）

5) ETDRS 視力

6) 静的視野検査（HFA）：10-2 プログラム及びエスターマンテスト（100 点）

7) 光干渉断層計（OCT）：エリプソイドゾーン（EZ）長、中心窩下の厚み（中心窩網膜厚）

※エリプソイドゾーン（EZ）長、中心窩を通るスライス長 6 mm における水平及び垂直断面の 2 方向撮影し、中心窩下の厚み（中心窩網膜厚）を計測し・数値化する。電気刺激による網膜への安全性確認も併せて実施する。

- エリプソイドゾーン（EZ）長：黄色矢印の間の長さ（▼：EZ）。

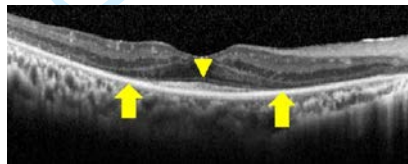

- 中心窩下の厚み（中心窩網膜厚）：黄色矢印で示した長さ。

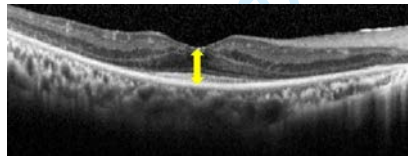

8) NEI VFQ 25 コンポ 9

※VFQ-25: The 25-item National Eye Institute Visual Function Questionnaire（視覚に関連した健康関連 QOL を測定する 12 の尺度「全体的健康感」、「全体的見え方」、「目の痛み」、「近見視力による行動」、「遠見視力による行動」、「見え方による社会生活機能」、「見え方による心の健康」、「見え方による役割制限」、「見え方による自立」、「運転」、「色覚」及び「周辺視覚」）から、「全体的健康感」、「目の痛み」及び「運転」を除いた 9 項目の平均値を求めるコンポ 9 を用いた QOL。

9) 細隙灯顕微鏡検査

10) 眼圧・眼底検査（カラー眼底写真）

11) 妊娠検査

※スクリーニング時、女性被験者を対象に、実施医療機関で定められた基準に従い、尿中 hCG 検査を実施する。ただし、両側卵巣摘出又は子宮摘出の既往歴がある被験者、又は別の医学的理由を伴わずに月経のない状態が 12 ヶ月以上にわたる被験者は実施不要とする。

12) 有害事象の観察

- なお、6) に関しては、同意取得前の自施設でのデータを使用することができる。
- 7) 10) に関して、OCT 及び眼底検査は散瞳してから実施する。

- 1  
2  
3  
4  
5  
6  
7
- 10) 眼圧検査に関しては、COVID-19 感染拡大防止の観点から、治験責任医師又は治験分担医師の判断で非実施とすることが出来る。この場合は、治験実施計画書からの逸脱とはしない。

### 8 7.1.2. 被験者の情報

9 同意取得時又はスクリーニング検査時に、以下の被験者情報を記録する。

- 10  
11  
12  
13  
14  
15  
16  
17  
18  
19  
20  
21  
22  
23  
24  
25  
26
- 1) 同意取得日
  - 2) 被験者識別コード
  - 3) 性別
  - 4) 同意取得時年齢・生年月日
  - 5) 身長・体重
  - 6) 既往・合併症
  - 7) 前治療歴
  - 8) 併用薬・併用療法
  - 9) 治験期間中に使用する予定の薬剤に対するアレルギーの有無
  - 10) 評価眼（両眼ともに選択基準等を満たす場合、評価眼は右目とする）

### 27 7.1.3. 観察・検査・評価項目

28 各来院時における検査項目を以下に記す。なお、治験責任医師又は治験担当医師の判断で、安全性上等  
29 の必要に応じて検査を追加することは可能とする。

30 眼圧検査に関しては、COVID-19 感染拡大防止の観点から、治験責任医師又は治験分担医師の判断で非  
31 実施とすることが出来る。この場合は、治験実施計画書からの逸脱とはしない。

#### 32 【評価期 0 週】

- 33  
34  
35  
36  
37  
38  
39  
40  
41  
42  
43  
44  
45  
46  
47  
48  
49  
50  
51  
52  
53  
54
- 治験機器施行前に以下を実施する。
    - ※スクリーニングと評価期 0 週の検査を同日に実施する場合、重複する検査についてはスクリーニング検査の結果を評価期 0 週の検査結果として使用可能。
    - 1) 自他覚症状：両眼に実施
      - ※角膜炎、皮膚炎の他、前眼部・中間透光体の評価、顔面神経や三叉神経、鼻への影響も確認する。
    - 2) logMAR 視力（矯正小数視力）：評価眼に実施
    - 3) ETDRS 視力：評価眼に実施
    - 4) 有害事象の観察
  - 治験機器施行後、当日中に以下を実施する。
    - 1) 自他覚症状：両眼に実施
      - ※角膜炎、皮膚炎の他、前眼部・中間透光体の評価、顔面神経や三叉神経、鼻への影響も確認する。
    - 2) 有害事象の観察

#### 55 【評価期 2, 4, 8, 10, 14, 16, 18, 20, 22 週】

- 56  
57  
58  
59  
60
- 治験機器施行前に以下を実施する。
    - 1) 自他覚症状：両眼に実施
      - ※角膜炎、皮膚炎の他、前眼部・中間透光体の評価、顔面神経や三叉神経、鼻への影響も確認する。

- 2) logMAR 視力（矯正小数視力）：評価眼に実施
- 3) 有害事象の観察

● 治験機器施行後、当日中に以下を実施する。

- 1) 自他覚症状：両眼に実施  
※角膜炎、皮膚炎の他、前眼部・中間透光体の評価、顔面神経や三叉神経、鼻への影響も確認する。
- 2) 有害事象の観察

【評価期 6 週】

● 治験機器施行前に以下を実施する。

- 1) 自他覚症状  
※角膜炎、皮膚炎の他、前眼部・中間透光体の評価、顔面神経や三叉神経、鼻への影響も確認する。
- 2) logMAR 視力（矯正小数視力）：評価眼に実施
- 3) 細隙灯顕微鏡検査：両眼に実施
- 4) 眼圧・眼底検査（カラー眼底写真）：両眼に実施
- 5) 有害事象の観察

なお、4) に関して、眼底検査は散瞳してから実施する。

● 治験機器施行後、当日中に以下を実施する。

- 1) 自他覚症状：両眼に実施  
※角膜炎、皮膚炎の他、前眼部・中間透光体の評価、顔面神経や三叉神経、鼻への影響も確認する。
- 2) 有害事象の観察

【評価期 12 週】

● 治験機器施行前に以下を実施する。

- 1) 自他覚症状：両眼に実施  
※角膜炎、皮膚炎の他、前眼部・中間透光体の評価、顔面神経や三叉神経、鼻への影響も確認する。
- 2) logMAR 視力（矯正小数視力）：評価眼に実施
- 3) ETDRS 視力：評価眼に実施
- 4) 静的視野検査（HFA）：10-2 プログラム及びエスターマンテスト（100 点）：評価眼に実施
- 5) 光干渉断層計（OCT）：エリプソイドゾーン（EZ）長、中心窩下の厚み（中心窩網膜厚）：評価眼に実施  
※エリプソイドゾーン（EZ）長、中心窩を通るスライス長 6 mm における水平及び垂直断面の 2 方向撮影し、中心窩下の厚み（中心窩網膜厚）を計測し・数値化する。電気刺激による網膜への安全性確認も併せて実施する。
- 6) NEI VFQ 25 コンポ 9
- 7) 細隙灯顕微鏡検査：両眼に実施
- 8) 眼圧・眼底検査（カラー眼底写真）：両眼に実施
- 9) 有害事象の観察

なお、5) 8) に関して、OCT 及び眼底検査は散瞳してから実施する。

- 治験機器施行後、当日中に以下を実施する。

- 1) 自他覚症状：両眼に実施  
※角膜炎、皮膚炎の他、前眼部・中間透光体の評価、顔面神経や三叉神経、鼻への影響も確認する。
- 2) 有害事象の観察

#### 【評価期 24 週、後観察期 48 週】

- 来院時に以下を実施する。：両眼に実施

- 1) 自他覚症状  
※角膜炎、皮膚炎の他、前眼部・中間透光体の評価、顔面神経や三叉神経、鼻への影響も確認する。
- 2) logMAR 視力（矯正小数視力）：評価眼に実施
- 3) ETDRS 視力：評価眼に実施
- 4) 静的視野検査（HFA）：10-2 プログラム及びエスターマンテスト（100 点）：評価眼に実施
- 5) 光干渉断層計（OCT）：エリプソイドゾーン（EZ）長、中心窩下の厚み（中心窩網膜厚）：評価眼に実施  
※エリプソイドゾーン（EZ）長、中心窩を通るスライス長 6 mm における水平及び垂直断面の 2 方向撮影し、中心窩下の厚み（中心窩網膜厚）を計測し・数値化する。電気刺激による網膜への安全性確認も併せて実施する。
- 6) NEI VFQ 25 コンボ 9
- 7) 細隙灯顕微鏡検査：両眼に実施
- 8) 眼圧・眼底検査（カラー眼底写真）：両眼に実施
- 9) 有害事象の観察

なお、5) 8) に関して、OCT 及び眼底検査は散瞳してから実施する。

#### 【後観察期 36 週】

- 来院時に以下を実施する。

- 1) 自他覚症状：両眼に実施  
※角膜炎、皮膚炎の他、前眼部・中間透光体の評価、顔面神経や三叉神経、鼻への影響も確認する。
- 2) logMAR 視力（矯正小数視力）：評価眼に実施
- 3) ETDRS 視力：評価眼に実施
- 4) 光干渉断層計（OCT）：エリプソイドゾーン（EZ）長、中心窩下の厚み（中心窩網膜厚）：評価眼に実施  
※エリプソイドゾーン（EZ）長、中心窩を通るスライス長 6 mm における水平及び垂直断面の 2 方向撮影し、中心窩下の厚み（中心窩網膜厚）を計測し・数値化する。電気刺激による網膜への安全性確認も併せて実施する。
- 5) 細隙灯顕微鏡検査：両眼に実施
- 6) 眼圧・眼底検査（カラー眼底写真）：両眼に実施
- 7) 有害事象の観察

なお、4) 6) に関して、OCT 及び眼底検査は散瞳してから実施する。

## 【中止時】

治験責任医師又は治験分担医師により治験機器施行の中止を判断された日から 7 日以内に可能な範囲で以下を実施する。

- 1) 自覚症状：両眼に実施  
※角膜炎、皮膚炎の他、前眼部・中間透光体の評価、顔面神経や三叉神経、鼻への影響も確認する。
  - 2) logMAR 視力：評価眼に実施
  - 3) ETDRS 視力：評価眼に実施
  - 4) 静的視野検査（HFA）：10-2 プログラム及びエスターマンテスト（100 点）：評価眼に実施
  - 5) 光干渉断層計（OCT）：エリプソイドゾーン（EZ）長、中心窩下の厚み（中心窩網膜厚）：評価眼に実施  
※エリプソイドゾーン（EZ）長、中心窩を通るスライス長 6 mm における水平及び垂直断面の 2 方向撮影し、中心窩下の厚み（中心窩網膜厚）を計測し・数値化する。電気刺激による網膜への安全性確認も併せて実施する。
  - 6) NEI VFQ 25 コンポ 9
  - 7) 細隙灯顕微鏡検査：両眼に実施
  - 8) 眼圧・眼底検査（カラー眼底写真）：両眼に実施
  - 9) 有害事象の観察
  - 10) 妊娠検査  
※必要に応じてスクリーニング時に実施した被験者を対象として実施する。
- なお、5) 8) に関して、OCT 及び眼底検査は散瞳してから実施する。

## 8. 有害事象発生時の取り扱い

### 8.1. 有害事象、不具合及び機器関連有害事象の定義

有害事象とは、治験機器との因果関係の有無に関わらず、当該治験機器の使用した又は使用された被験者その他の者に生じたすべての疾病若しくは障害又はこれらの兆候をいう。ただし、被験者以外の者に生じたものについては、治験機器の使用による影響と疑われるものに限る。

既存の病態（治験期間よりも以前に存在した既往歴又は合併症）については、治験期間内に増悪又は発症頻度の上昇がない限り、有害事象として扱わない。ただし、治験機器施行後に合併症が悪化した場合、有害事象として取扱い、悪化が確認された日を有害事象の発現日とする。

不具合とは、破損、作動不良等広く品質、安全性、性能等に関する治験機器の具合の良くないことをいい、設計、交付、保管、使用のいずれの段階によるものであるかを問わない。治験機器の不具合に関する情報を以下、不具合情報という。

機器関連有害事象とは、有害事象のうち本治験機器又は手技との因果関係が否定できないものをいう。

### 8.2. 有害事象又は不具合発生時の被験者への対応

治験責任医師又は治験分担医師は、有害事象又は不具合を認めたときは、直ちに適切な処置を行うとともに、治験機器の使用を中止した場合や、有害事象に対する治療が必要となった場合には、被験者にその旨を伝える。なお、治験終了・中止時に治験機器との因果関係が否定できない有害事象が未回復の場合は、原則として回復又は軽快するまで可能な限り観察を継続する。ただし、治験責任医師又は治験分担医師が本治験の影響は消失しており、被験者の安全性は十分確保され、それ以上の追跡調査は必要ないと判断した場合はこの限りではない。

### 8.3. 報告の対象となる有害事象及び不具合

同意取得時から治験終了時まで発生したすべての有害事象は、治験機器との因果関係の有無に関わらず報告し、有害事象が消失するか治験期間終了時（中止時）まで観察する。また、治験機器との因果関係が否定できないと判断された有害事象及び発生した不具合情報については治験期間終了時まですべて報告する。

### 8.4. 有害事象及び不具合発生時の報告手順

上記期間に発生したすべての有害事象及び不具合について、治験責任医師又は治験分担医師は、カルテならびに症例報告書に齟齬なく記載する。

### 8.5. 有害事象及び不具合の評価に必要な記載内容

#### 8.5.1. 有害事象

#### 1) 有害事象の名称

有害事象名は、原則として診断名・疾患名（病名）で記録する。診断名・疾患名が特定できない場合や治験責任医師又は治験分担医師より診断名・疾患名としないことが妥当と判断された場合には、臨床症状又は徴候を有害事象名とする。

#### 2) 発現日

- 3) 消失日：回復、回復又は消失したが後遺症あり、死亡の場合に日付
- 4) 転帰：回復、軽快、回復又は消失したが後遺症あり、未回復、死亡、不明
- 5) 処置（治験機器の施行）：変更なし、中止、休止、該当せず
- 6) その他処置：なし、薬物治療、その他
- 7) 重篤度：非重篤、重篤
- 8) 重症度：軽度、中等度、重度
  - ・ 軽度：日常生活に支障を来たさないと考えられる程度の有害事象。例）経過観察可能な程度
  - ・ 中等度：日常生活に支障を来たすと考えられる程度の有害事象。例）何らかの介入や治療が必要な程度
  - ・ 重度：日常生活を困難にすると考えられる程度の有害事象。例）高度かつ集中的な治療や全身介助が必要とされる程度
- 9) 治験機器との因果関係：関連が否定できる（否定理由コメント要）、関連が否定できない

### 8.5.2. 不具合

- 1) 不具合を起こした機器番号
- 2) 不具合名
- 3) 不具合の確認日
- 4) 発生日
- 5) 不具合が発生したと考えられる原因及び不具合状況
- 6) 不具合に対する処置
- 7) 当該不具合による有害事象の有無

### 8.5.3. 有害事象の回復性と治験機器との因果関係

#### 8.5.3.1. 治験機器との因果関係

有害事象の回復とは、有害事象がない状態、又は治験機器施行前の状態への回復とする。有害事象における治験機器との因果関係の判定に際しては、被験者の全身状態、合併症、併用薬・併用療法、時間的關係を勘案して判断する。

- 1) 関連が否定できる：他の要因が合理的な可能性を有し説明できる場合、あるいは被験者が治験機器施行開始前
- 2) 関連が否定できない：他の要因との関連がはっきりできない場合

#### 8.5.3.2. 治験機器に関する処置

- 1) 変更なし：有害事象が発現したが、治験機器治療の施行条件に変更がない場合
- 2) 中止：有害事象の発現により、治験機器施行を中止した場合
- 3) 休止：有害事象の発現により、治験機器施行を一時的に休止した場合
- 4) 該当せず：有害事象が治験機器施行開始前又は治験期間終了後に発現した場合

### 8.5.3.3. 転帰

- 1) 回復：有害事象が発現以前の状態に回復、消失した場合
- 2) 回復又は消失したが後遺症あり：有害事象が回復したが、有害事象の影響が後遺症として残っている場合
- 3) 死亡：発現した有害事象が死亡の直接の原因となった場合
- 4) 軽快：有害事象は継続しているが、症状は改善傾向である場合
- 5) 未回復：有害事象は継続している（症状は改善傾向でない）場合
- 6) 不明：被験者の追跡が不能となった場合

## 8.6. 重篤な有害事象発生時の取り扱い

### 8.6.1. 重篤な有害事象の定義

重篤な有害事象とは、次のいずれかに該当するものとする。

- 1) 死亡に至るもの（死亡）
- 2) 生命を脅かすもの（死亡につながるおそれ）
- 3) 入院又は入院期間の延長が必要になるもの
- 4) 永続的又は顕著な障害・機能不全に陥るもの
- 5) 先天性異常をきたすもの
- 6) その他、上記に準じて重篤なもの

なお、以下に記載する理由での「入院」については重篤な有害事象とはみなさない。

- ・ 再検査、追跡調査のための入院又は入院期間の延長、及び治験開始前より予定していた治療又は検査を治験中に実施することのみを目的とした入院（予定手術や検査等）は含まれない。（ただし、その入院中新たに発生したものは有害事象として取り扱う。）
- ・ 本治験の対象疾患に関係のない既存の病態に対する待機的治療のための入院。
- ・ 全身状態の悪化を伴わない、社会的事由及び介護者の一時休息のための入院。

### 8.6.2. 報告の対象となる重篤な有害事象

報告対象は、同意取得時から治験終了（中止）時まで発生した、すべての重篤な有害事象又はその発生のおそれがある事象、及び治験終了（中止）後に治験機器との関連性が疑われる重篤な有害事象とする。



### 8.6.3. 重篤な有害事象等の報告手順

有害事象が発生し、治験責任医師等が重篤と判断した場合、次の手順に従い当該有害事象情報を取り扱う。

#### 1) 治験責任医師から実施医療機関の長への報告

治験責任医師は、同意取得時から、治験期間中に治験機器の不具合等による死亡その他の重篤な有害事象の発生を認めた場合又はその発生のおそれがあると認めた場合は、直ちに各実施医療機関の長に文書にてその内容を報告する。報告に際しては、重篤な有害事象が予測出来ないか否かを特定する。

また、治験責任医師は可能な限り速やかに「重篤な有害事象及び不具合に関する報告書」（統一書式 14）及び「医詳細記載用書式」に当該事象の詳細な内容を記載し、実施医療機関の長に報告する。

#### 2) 治験責任医師から治験調整医師、治験機器提供者への報告

治験責任医師は、同意取得時から、治験期間中に治験機器の不具合等による死亡その他の重篤な有害事象の発生を認めた場合又はその発生のおそれがあると認めた場合は、直ちに治験調整医師及び治験機器提供者にその内容を報告する。

また、治験責任医師は可能な限り速やかに「重篤な有害事象及び不具合に関する報告書」（統一書式 14\_及び医詳細記載用書式）に当該事象の詳細な内容を記載し、治験調整医師に報告する。

#### 3) 治験責任医師と治験調整医師との協議

治験責任医師は、必要に応じ治験調整医師と協議し、治験責任医師としての意見（厚生労働大臣への報告の必要性を含む。）を治験調整委員会に報告する。

また、データモニタリング委員会に治験責任医師の判断について諮問を行った場合には、データモニタリング委員会の意見に従う。

#### 4) 厚生労働大臣への報告

薬機法に規定される報告対象となる有害事象又は不具合と判断した場合は、治験調整医師は「医療機器不具合・感染症症例報告書」（別紙様式第 8）を作成し、データモニタリング委員会及び PMDA へ報告する。

詳細な手順は「安全性情報の取り扱いに関する手順書（仮称）」に従う。

#### 5) 実施医療機関の長への報告

治験責任医師は、厚生労働大臣への報告がなされた場合には、治験調整医師より入手した「医療機器不具合・感染症症例報告書」（別紙様式第 8）及び必要に応じ「医詳細記載用書式」の内容を、可能な限り速やかに実施医療機関の長に報告する。

#### 6) 追加情報の入手時の対応

当該有害事象が発生した実施医療機関の治験責任医師は、当該事象に関する追加情報が得られた場合には、可能な限り速やかに各実施医療機関の長に追加報告を行うとともに、治験調整医師及び治験機器提供者に報告する。当該追加情報の取扱いは、上記 1)~5) の手順に準ずることとし必要に応じ PMDA への報告等を行う。

## 9. 評価項目

### 9.1. 主要評価項目

24 週時における logMAR 視力（矯正小数視力から換算）の 0 週からの変化量における電気刺激群のシャム群に対する優越性

#### 【主要評価項目の設定根拠】

logMAR 視力：国内で実施される視機能の維持・改善効果を検討する臨床研究に広く用いられているため。

### 9.2. 副次評価項目

24 週の下記測定項目における電気刺激群とシャム群の比較

- 1) logMAR 視力
- 2) ETDRS チャートを用いた ETDRS 視力
- 3) 静的視野検査（HFA）：10-2 プログラム MD 値の網膜感度
- 4) 静的視野検査（HFA）：エスターマンテスト（100 点）スコア
- 5) 光干渉断層計（OCT）：黄斑部エリプソイドゾーン長
- 6) 光干渉断層計（OCT）：中心窩網膜厚
- 7) logMAR 視力下面積
- 8) NEI VFQ 25 コンポ 9

#### 【副次評価項目への設定根拠】

- 1) logMAR 視力：国内で実施される視力の維持・改善効果を検討する臨床研究に広く用いられているため。
- 2) ETDRS 視力：欧米及び本邦で広く使用されている視力評価であり視機能判定として臨床現場で定着しているため。
- 3) 静的視野検査（HFA）10-2 プログラム MD 値：中心約 10 度部分以内の視野を詳しく測定するのに向いているため。
- 4) 静的視野検査（HFA）エスターマンテスト（100 点）スコア：自動視野計であり検者間での差異が少なく、再現性・定量性に優れているため。
- 5), 6) OCT における黄斑部エリプソイドゾーン長及び中心窩網膜厚は OCT を用いた自動測定が可能であり、RP の進行度の客観的指標とされているため。
- 7) logMAR 視力下の面積を算出することで、経皮膚電気刺激による logMAR 視力への累積効果を評価できると考え設定する。
- 8) 視覚に関連した健康関連 QOL を測定する尺度として眼科疾患が日常生活に与える影響を評価したり、治療やケアの結果を評価したりするのに広く使用されており、日本語版は、信頼性・妥当性などの計量心理学的特性が検証済みのため。

### 9.3. 探索的評価項目

36 週及び 48 週の下記測定項目における電気刺激群とシャム群の比較

- 1  
2  
3  
4  
5  
6  
7  
8  
9  
10  
11  
12  
13  
14  
15  
16  
17  
18  
19  
20  
21
- 36 週時点
    - 1) logMAR 視力
    - 2) ETDRS チャートを用いた ETDRS 視力
    - 3) 光干渉断層計 (OCT) : 黄斑部エリプソイドゾーン長
    - 4) 光干渉断層計 (OCT) : 中心窩網膜厚
  - 48 週時点
    - 1) logMAR 視力
    - 2) ETDRS チャートを用いた ETDRS 視力
    - 3) 静的視野検査 (HFA) : 10-2 プログラム MD 値の網膜感度
    - 4) 静的視野検査 (HFA) : エスターマンテスト (100 点) スコア
    - 5) 光干渉断層計 (OCT) : 黄斑部エリプソイドゾーン長
    - 6) 光干渉断層計 (OCT) : 中心窩網膜厚

22  
23

**【探索的評価項目への設定根拠】**

- 24  
25  
26  
27  
28
- 1) ETDRS チャートにおける 1 行以上の改善した被験者の割合を検討するため。
  - 2) 本治験機器において視力の低下が抑制されていることを検討するため。
  - 3) 電気刺激治療終了後の効果の維持の有無を探索的に評価するため。

29  
30  
31

**9.4. 安全性評価項目**

- 32
- ・ 同意取得時から評価期 24 週における有害事象の発現状況 (種類、頻度及び重症度等)

33  
34  
35  
36  
37  
38  
39  
40

被験者に観察された有害事象をすべて記録し有害事象の発現状況 (種類、頻度及び重症度等) を解析する。有害事象名は MedDRA/J の LLT に読み替え、PT、SOC で集計をする。第 II 相試験 (試験番号 K29001) では有害事象の発現が見られなかったが、角膜炎、皮膚炎の他、前眼部・中間透光体の評価も行う。また、顔面神経や三叉神経、鼻への影響も受診の際に確認を行う。加えて、光干渉断層計 (OCT) による安全性評価 (電気刺激の網膜への安全性も含む) を行う。

- 41  
42  
43
- ・ 24 週以降 48 週目までの遅発性有害事象の発現状況 (種類、頻度及び重症度等)

44  
45  
46  
47

被験者に観察された治験機器施行完了後、すべての有害事象を記録し遅発性有害事象の発現状況 (種類、頻度及び重症度等) を解析する。解析は最初の 24 週間と同様に行う。

48  
49

**【安全性評価項目の設定根拠】**

50  
51

本治験の安全性について評価するため設定した。

52  
53  
54

**10. 統計学的事項**

55  
56  
57  
58  
59  
60

本治験の統計解析計画の概要を以下にまとめた。なお、統計解析計画の詳細は、統計解析計画書に記載する。統計解析計画書において本治験実施計画書の概要を修正することがあるが、主要評価項目の定義や解析方法が変更される場合には、本治験実施計画書を改訂する。

## 10.1. 解析対象集団

### 10.1.1. 安全性解析対象集団

本治験に登録され、少なくとも1回は治験機器が施行された症例を安全性解析対象集団とする。ただし、医療機器 GCP 省令不遵守例は安全性解析対象集団から除外する。

### 10.1.2. 最大の解析対象集団

本治験に登録され、1回以上治験機器が施行され、有効性データがあるすべての被験者を最大の解析対象集団（以下、「FAS」という。）とする。ただし、ベースラインのデータが取得されなかった被験者及び、重大な治験実施計画書違反（同意未取得、等）の被験者については除外する。

### 10.1.3. 治験実施計画書に適合した対象集団

FAS から、治験方法や併用療法等、治験実施計画書の規定に対して、以下の重大な違反があった症例を除いた被験者集団（以下、「PPS」という。）とする。

選択基準違反、除外基準違反、併用禁止薬違反、併用禁止療法違反、80%未満の治療率

## 10.2. 目標症例数と設定根拠

50例（電気刺激群25例、シャム群25例）50眼

※両目とも選択基準を満たし、除外基準に該当しない場合は右眼とする。

### 【設定根拠】

第Ⅱ相試験（試験番号 K29001）の結果から、8週、10週、12週時点で、logMAR 視力の改善が認められた。この結果より、本治験の主要評価項目の24週の変化量を0.1 log MAR、標準偏差0.124（前値と後値の標準偏差を0.16、前値と後値の相関を0.7と仮定）と想定した。

一方、新生血管を伴う加齢黄斑変性症の治験17から2年間で1.6文字（0.032logMAR）のプラセボ効果がシャム群で報告されている。シャム群におけるプラセボ効果も時間に対し、線形であることを仮定し本治験の主要評価の評価時点（24週）でのシャム群のプラセボ効果を ETDRS 0.4文字（0.008 logMAR）標準偏差に関しては電気刺激群と同じであることを想定した。シャム群においては、第Ⅱ相試験（試験番号 K29001）の付随研究における自然経過の悪化（2013～2017年のlogMAR回帰式： $\log\text{MAR}=0.04709 \times \text{year} - 94.6037$ （ $p=0.002$ ））に比べれば改善されているもののベースラインからは若干悪化するような値（ $-0.008 \log\text{MAR}$ ）と仮定した。

以上より、電気刺激群0.1 logMAR、Sham群では $-0.008 \log\text{MAR}$ 、共通の標準偏差を0.124と仮定し、有意水準 $\alpha$ を0.05、検出力80%の場合各群、22例、機器群とシャム群の両群を合わせて44例が必要である。脱落率を10%程度と想定し各群25例、両群で50例を目標症例数とする。

## 10.3. 症例の取り扱い

原則として登録された症例については、治験調整医師及び統計解析責任者が協議の上、症例の取り扱いを決定する。新たな問題が起こった場合の症例の取り扱いについても、治験調整医師及び統計解析責任者が、協議の上、決定する。症例の取り扱いについて、協議及び決定はすべて盲検下で実施され、開鍵前ま

1  
2  
3  
4  
5  
6  
7  
8  
9  
10  
11  
12  
13  
14  
15  
16  
17  
18  
19  
20  
21  
22  
23  
24  
25  
26  
27  
28  
29  
30  
31  
32  
33  
34  
35  
36  
37  
38  
39  
40  
41  
42  
43  
44  
45  
46  
47  
48  
49  
50  
51  
52  
53  
54  
55  
56  
57  
58  
59  
60

でに完了する。

#### 10.4. データの取り扱い

データ集計・解析時におけるデータの取り扱いについては、原則として以下に示すとおりとする。疑義が生じた場合は、統計専門家と治験調整医師が協議の上データ固定前に決定する。

欠測値に対しては補完を行わない。

協議及び決定はすべて盲検下で実施され、開鍵前までに完了する。

#### 10.5. 統計解析項目及び解析計画

すべての症例において治験機器の使用が終了し、データが固定された後に解析を行う。

有効性評価において、FAS 及び PPS における解析を行う。FAS と PPS が同じとみなせる集団の時は PPS の解析は実施しない。

主要評価項目、副次評価項目及び探索的評価項目の解析は評価眼を対象に行う。

統計解析の詳細はデータ固定前に別途作成する統計解析計画書に規定する。

##### <主要評価項目>

- 24 週時における logMAR 視力（矯正小数視力から換算）の 0 週からの変化量における電気刺激群のシャム群に対する優越性

##### <副次評価項目>

- 24 週時までの副次評価項目の変化量

##### <探索的評価項目>

- 48 週時までの副次評価項目の変化量
- 副次評価項目の 24 週時点を起点とした変化量
- 副次評価項目の視力の改善割合

##### <安全性評価項目>

- 有害事象の発現状況は、治療開始前、開始後 24 週間及び 24 週以後に発現した有害事象の時点ごとの有害事象の発現割合
- 治験機器と関連性のある有害事象、重篤な有害事象及び重症度別有害事象の発現割合を、発生状況に応じ算出する
- 自覚症状は時点ごとに評価された自覚症状（角膜炎、皮膚炎、前眼部・中間透光体、顔面神経、三叉神経、鼻への影響）の発生割合

##### 10.5.1. 被験者背景の解析

各解析対象集団における被験者背景データの分布及び要約統計量を算出する。名義変数については、カテゴリの頻度及び割合を示す。連続変数については要約統計量を算出する。

## 10.5.2. 安全性及び有効性の解析

### 10.5.2.1. 主たる解析

有効性の主要評価項目は、24 週時における logMAR 視力（矯正小数視力から換算）の 0 週からの変化量である。主たる解析はシャム群と電気刺激群の 24 週時における logMAR 視力変化量が等しいという帰無仮説の検定を実施する。各群の logMAR 視力の 24 週の 0 週からの変化量（24 週-0 週）を動的割付の因子を調整因子として、共変量調整解析を行う。

### 10.5.2.2. 副次解析

本治験の主たる解析結果を補足する考察を行う目的で副次評価項目の解析を行う。副次評価項目の解析は原則主要評価項目と同様な手法を用いる。副次評価項目では 24 週までの複数時点をを用いた経時解析を実施するが多重性の調整は行わない。

### 10.5.2.3. 探索的解析

24 週以降、36 週及び 48 週のデータを含め探索的な解析を行う。探索解析では 24 週時点からの変化量を算出などの検討を行い、主要評価項目を含む副次評価項目における予後の検討を探索的に行う。

## 10.5.3. 安全性の解析

24 週までに生じた有害事象及び 24 週以後の安全性の評価項目について、発現割合および発現割合の 95 % 信頼区間を算出する。

## 10.6. データモニタリング委員会

本治験ではデータモニタリング委員会を設置する。データモニタリング委員会は治験責任医師と独立した機関として設立され、本治験とは独立した立場である 3 人以上の専門家による委員で構成される。データモニタリング委員会は、被験者の安全性を確保することを目的に、年一回程度、被験治療における有害事象発現率の比較、重篤な有害事象に関する詳細な検討等の安全性モニタリングを行う。ときにその結果を踏まえて有害事象のリスクを軽減する為に、組入れ基準の変更等の治験デザインの変更を勧告すること、あるいは治験の継続の可否を判断することもある。詳細は「データモニタリング委員会に関する標準業務手順書」に従う。

## 10.7. 最終解析

追跡期間終了後、データが得られ症例が固定された後に解析を行う。統計解析責任者が「解析報告書」をまとめ、治験調整医師及び治験責任医師に提出する。治験調整医師は解析報告書の内容を総括し、治験全体の結論、問題点、結果の解釈及び考察、今後の方針等を主として臨床的観点からまとめた「総括報告書」を作成し、治験責任医師の承認を得る。

## 11. 治験実施計画書の遵守及び逸脱

- 1) 治験責任医師又は治験分担医師は、本治験実施計画書を遵守して治験を実施する。
- 2) 治験責任医師又は治験分担医師は、治験実施計画書から逸脱した場合、すべての逸脱の詳細及び理由

を記録する。

- 3) 被験者の緊急の危機を回避するためその他医療上やむを得ない理由により実施計画書から逸脱した場合、治験責任医師は、逸脱の内容及びその理由を記載した文書を実施医療機関の長に直ちに提出するとともに、当該文書の内容を実施医療機関の長を経由して治験審査委員会に速やかに報告する。
- 4) 被験者が SARS-CoV-2 に感染した場合、濃厚接触者になった場合あるいは実施医療機関が治験の来院を中断した場合、来院治療及び検査が出来なくなる。このことは、SARS-CoV-2 に特化した状況に起因する治験実施計画書からの逸脱になることから、治験責任医師又は治験分担医師は SARS-CoV-2 に起因すると考えられる逸脱の概要を明確に記録する。

## 12. 治験実施計画書、症例報告書又は解析計画に関する変更

### 12.1. 治験実施計画書及び症例報告書の改訂

治験実施計画書及び症例報告書を改訂する場合には、以下の手順により行う。

- 1) 治験責任医師は、治験機器の品質、有効性及び安全性に関する事項、その他治験を適正に行うために重要な情報を知ったときは、必要に応じて当該治験実施計画書を改訂する。また、改訂の際には改訂履歴を作成し、それを保存する。
- 2) 治験責任医師は、必要に応じ治験実施計画書の改訂に併せて又は他の理由により症例報告書を改訂する。また、改訂の際には改訂履歴を作成し、それを保存する。
- 3) 治験責任医師は治験実施計画書改訂版及び症例報告書用紙改訂を速やかに実施医療機関の長に提出し、実施医療機関の長を経由して速やかに治験審査委員会の承認を得る。
- 4) 治験審査委員会の意見に基づく実施医療機関の長の指示が治験責任医師の許容できる範囲内で、治験実施計画書及び症例報告書用紙を修正する場合も同様の手順とする。

### 12.2. 統計解析計画の変更

統計解析責任者は、統計解析計画書の内容を変更した場合、変更内容をすべて本治験の統計解析報告書に記載する。なお、統計解析計画書の変更は、その経緯を記録に残す。

## 13. 治験の中止、中断又は終了

### 13.1. 治験全体での中止又は中断の基準

治験調整医師は、以下の情報が得られ、治験全体の続行が困難であると考えられる時には、治験責任医師と治験全体の中止又は中断について協議のうえ、決定する。

- 1) 治験機器に関する新たな安全性情報又は重篤な有害事象及び不具合情報が得られる等、治験の安全性確保が困難になった場合。
- 2) 実施医療機関が、重大な医療機器 GCP 省令違反、治験実施計画書からの重大な逸脱を行った場合。
- 3) その他、治験実施中に治験の中止・中断が必要と考えられる新たな情報が得られた場合。

### 13.2. 治験全体での中止又は中断する場合の手続き

治験調整医師は、他の治験責任医師との協議又はデータモニタリング委員会等への諮問により治験全体を中止又は中断する場合には、実施医療機関の長及び PMDA にその旨とその理由を詳細に速やかに文

書で通知する。また、治験機器施行中の被験者に対して速やかにその旨を伝え、適切な治療への変更等の適切な処理を行うものとする。

### 13.3. 個々の実施医療機関での治験の中止又は中断する場合の手続き

治験責任医師は、治験を中止又は中断した場合には、実施医療機関の長に速やかにその旨を文書で通知するとともに、中止又は中断について文書で詳細に説明する。

治験調整医師は、治験責任医師が治験を中止又は中断した旨を通知してきた場合には、中止又は中断について詳細に説明された文書により当該治験に関与するすべての治験責任医師及び PMDA に速やかに文書で通知する。

### 13.4. 治験の終了

治験責任医師は、治験終了後、実施医療機関の長に治験が終了した旨を文書で通知し、治験結果の概要を文書で報告する。

## 14. データマネジメント

### 14.1. データマネジメントの手順

データマネジメントに関する詳細な手順については、データマネジメント計画書に記載する。

### 14.2. データの収集

治験責任医師又は治験分担医師は、21 CFR Part 11、医療機器 GCP 省令及び ER/ES 指針の要件に対応した Electronic Data Capture（以下、「EDC」という。）を用いた症例報告書を作成する。治験責任医師又は治験分担医師は、症例報告書の記載内容の変更、修正又は追記に当たっては、症例報告書を作成した EDC 上でを行い、すべて電子情報として記録する。なお、治験責任医師は、治験分担医師が症例報告書を作成した場合並びに治験協力者が原資料（原データ）から症例報告書に転記した場合には、当該症例報告書が提出される前にその内容について点検し、問題がないことを確認する。治験責任医師は、最終的に電子症例報告書を電子媒体（例：CD-R 等）にて実施医療機関へ提供する。治験責任医師は、電子症例報告書の見読性、保存性を担保する。

EDC システムの使用にあたり、実施医療機関は EDC トレーニングを受講し、入力方法の詳細は別途入力マニュアルを参照する。

### 14.3. 症例報告書に直接記入され、かつ原資料（原データ）と解すべき資料の特定

- ・ 本治験においては、以下の文書などを原資料（原データ）とする。
  - 1) 被験者の同意及び被験者への情報提供に関する記録、診療録、看護記録、臨床検査データ及び画像検査フィルム等症例報告書作成の基となった記録。なお、電子カルテに格納されたデータも原資料とみなす。
  - 2) 治験機器施行に関する記録
  - 3) 本治験に関連する指針上必要な治験に係る文書又は記録



1  
2  
3  
4  
5  
6  
7  
8  
9  
10  
11  
12  
13  
14  
15  
16  
17  
18  
19  
20  
21  
22  
23  
24  
25  
26  
27  
28  
29  
30  
31  
32  
33  
34  
35  
36  
37  
38  
39  
40  
41  
42  
43  
44  
45  
46  
47  
48  
49  
50  
51  
52  
53  
54  
55  
56  
57  
58  
59  
60

- ・ 症例報告書に記載されたデータのうち、以下に示す項目は症例報告書の記載をもって原資料（原データ）とする。ただし、診療録等に記載のある場合は、当該診療録等を原資料（原データ）とみなす。

- 1) 併用薬・併用療法の目的
- 2) 有害事象の程度、転帰（追跡調査時の結果を含む）、重篤度、治験機器との因果関係の判定及び判定根拠
- 3) 被験者の治験中止理由
- 4) 治験責任医師又は治験分担医師のコメント

## 15. 記録の保存

### 15.1. 実施医療機関による記録の保存

医療機器 GCP 省令に規定される実施医療機関において保存すべき治験に係る文書又は記録は、病院長が次の日のうちいずれかの遅い日までの期間保存する。

- 1) 当該被験機器の当該効能・効果に係る製造販売承認日（開発が中止された場合には、開発中止が決定されてから 3 年が経過した日）
- 2) 治験の中止又は終了後 3 年が経過した日

治験責任医師は、実施医療機関又は治験審査委員会が保存すべき記録について保存が不要となった場合、実施医療機関に通知する。

### 15.2. 治験責任医師による記録の保存

医療機器 GCP 省令に規定される治験責任医師が保存すべき治験に係る文書又は記録は、適切と判断される保管場所において、次のうちいずれか遅い日までの期間保存する。

- 1) 当該被験機器の当該効能・効果に係る製造販売承認日から 5 年が経過した日（開発が中止された場合には開発中止が決定された日から 3 年が経過した日）。ただし、薬機法の規定により承認後の再審査を受けなければならない医療機器で、かつ再審査が終了するまでの期間が 5 年を超えるものについては、再審査が終了する日。
- 2) 治験の中止又は終了後 3 年が経過した日。

## 16. 原資料の直接閲覧

実施医療機関の長及び治験責任医師は、モニタリング、監査及び治験審査委員会又は規制当局による調査の際に、原資料等すべての記録を閲覧できることを保証する。治験が適切に実施されていること及びデータの信頼性が十分に確保されていることを確認する。直接閲覧の方法、実施時期についてはモニタリング計画書に別途定める。

## 17. 治験の品質管理及び品質保証

### 17.1. 品質管理

- 1) 本治験実施計画書からの逸脱した行為があった場合は、治験責任医師又は治験分担医師は、本実施計画書に定めるところに従う。
- 2) 治験責任又は治験分担医師は、症例報告書を本治験実施計画書に従って作成する。

- 3) 治験責任医師は、症例報告書に記載されたすべてのデータ及びその他の記録が正確及び完全であること確認する。
- 4) 症例報告書に記載されたデータのうち、原資料と何らかの矛盾がある場合は、治験責任医師はその理由を説明する記録を作成・保存する。
- 5) 治験調整医師は、当該モニタリングの対象となる実施医療機関において当該治験に従事していない者をモニターとして指名し、治験審査委員会の審査を経たモニタリング手順書に従いモニタリングを実施させる。モニターは、下記の事項を確認する。
  - － 被験者の人権、安全及び福祉が保護されている
  - － 医療機器 GCP 省令、最新の治験実施計画書及び当該治験に係る手順書を遵守して実施している
  - － 治験責任医師又は治験分担医師から報告されたデータ等が正確かつ完全で原資料等の治験関連記録と照らし検証できる
- 6) データマネジメント責任者は、別途定めた標準業務手順書に従ってデータマネジメント計画を立案し、データの取扱い各段階で品質管理を行い、その品質を確保する。

## 17.2. 品質保証

治験調整医師は、監査に関する計画書及び業務に関する手順書を作成し、治験審査委員会の意見を踏まえて、当該計画書及び手順書に従って監査を実施させる。なお、監査担当者は、当該監査に係る治験機器の開発を担当する者でなく、また、当該監査に係る実施医療機関において当該治験の実施（その準備及び管理を含む。）及びモニタリングに従事していない者とする。

## 18. 倫理及び GCP

本治験の実施に際しては、「ヘルシンキ宣言（2013 年フォルタレザ総会改訂）」、薬機法及び医療機器 GCP 省令に従って行われる。また、本治験実施計画書及び当該治験に係る手順書を遵守して施行される。

また、治験責任医師又は治験分担医師は、被験者の選定にあたって、人権保護の観点ならびに選択基準と除外基準に基づいて被験者の健康状態、症状、年齢、性別、同意能力、治験責任医師等との依存関係、他の治験を含む臨床試験への参加の有無を十分に考慮したうえで、治験への参加を求めることの適否を慎重に検討する。

## 19. 治験審査委員会

本治験の実施に先立ち、実施医療機関の治験審査委員会は、本治験の倫理的、科学的及び医学的妥当性を審査する。本治験は、治験審査委員会の承認を得た後に実施する。治験審査委員会の審議結果が「修正の上で承認する」であった場合には、審議結果に基づいて実施計画書又は症例報告書、同意説明文書等を修正し承認した後、本治験を実施する。また、治験審査委員会は少なくとも 1 年に 1 回以上の頻度で本治験が適切に実施されているか否かを継続的に審査する。

## 20. 健康被害補償及び保険

本治験に参加した結果として被験者に健康被害が生じた場合、治験責任医師はその治療に関する医療体制の提供等必要かつ適切な処置を行う。ただし、本治験では自己負担分の医療費及び医療手当は支払わ

れない。本治験に起因する健康被害により生じた賠償責任、補償責任への対応として、治験責任医師、治験分担医師、実施医療機関及び治験調整委員会等本治験に携わる者は医師主導治験保険に加入する。

## 21. 治験に関する費用負担

本治験に係わる費用は下記のとおりとする。

- 1) 本治験で使用される治験機器は有限会社メイヨーより提供される。
- 2) 被験者の負担軽減費の支払いは、各実施医療機関が別途定める規程に従う。

## 22. 研究資金及び利益相反

本研究は、国立研究開発法人日本医療研究開発機構（AMED）医療機器開発推進研究事業の以下の研究によって実施する。

<事業名>医療機器開発推進研究事業

<プログラム名>高齢者向けまたは在宅医療の推進に資する革新的医療機器の医師主導治験・臨床研究

有限会社メイヨーは、医療機器 GCP 省令上の治験機器に関する情報は提供するが、治験の実施、解析、報告に係わることはない。

本治験の利害関係については、各実施医療機関が別途定める規程に従い適切に審議する。

## 23. 治験のデータベース登録

本治験は、最初の被験者からの同意取得前に臨床研究実施計画・研究概要公開システム（jRCT）

(<https://jrct.niph.go.jp/>) に登録を行う。

## 24. 付録

- ・ VFQ-25

## 25. 治験実施体制

本治験の実施体制は、別紙 1 参照

## 26. SARS-CoV-2 流行時における治験手順の一時的な変更

本治験実施時において SARS-CoV-2 が流行した場合、実施医療機関及び被験者に前例のない困難や問題が生じる可能性がある。過去の治験上での経験及び起こりうる危機的状況を鑑み、治療の継続及び被験者の安全性を確保しながら継続してデータを収集する治験上可能な変更について別紙 2 に記載する。別紙 2 は暫定的な処置であり、SARS-CoV-2 の流行状況等を鑑み適宜変更する。

## 27. 参考資料・文献リスト

1. 三宅養三, 柳田和夫, 他: EER (Electrically Evoked Response) の臨床応用IV視神経疾患のEER解析. 日眼会誌 84: 2047-52, 1980.
2. Morimoto T, Miyoshi T, et al: Electrical stimulation enhances the survival of axotomized retinal ganglion cells in vivo. *Neuroreport* 13: 227-30, 2002.
3. Okazaki Y, Morimoto T, et al: Parameters of optic nerve electrical stimulation affecting neuroprotection of axotomized retinal ganglion cells in adult rats. *Neurosci Res* 61: 129-35, 2008.
4. Morimoto T, et al. Transcorneal electrical stimulation rescues axotomized retinal ganglion cells by activating endogenous retinal IGF-1 system. *Invest Ophthalmol Vis Sci.* 46: 2147-2155, 2005.
5. Sato T, et al: Direct effect of electrical stimulation on induction of brain-derived neurotrophic factor from cultured retinal Muller cells. *Invest Ophthalmol Vis Sci.* 49: 4641-464, 2008.
6. Ni YQ, et al.: Neuroprotective effect of transcorneal electrical stimulation on light-induced photoreceptor degeneration. *Exp Neurol.* 219: 439-452, 2009.
7. Ciavatta VT, et al.: Growth factor expression following implantation of microphotodiode arrays in RCS rats. *Invest Ophthalmol Vis Sci.* 47:3177, 2006.
8. Zhou WT, et al.: Electrical stimulation ameliorates light-induced photoreceptor degeneration in vitro via suppressing the proinflammatory effect of microglia and enhancing the neurotrophic potential of Muller cells. *Exp Neurol.* 238: 192-208, 2012.
9. Wang X, et al.: Neuroprotective effect of transcorneal electrical stimulation on ischemic damage in the rat retina. *Exp Eye Res.* 93: 753-760, 2011.
10. Kanamoto T, et al.: Proteomic study of retinal proteins associated with transcorneal electric stimulation in rats. *J Ophthalmol.* 2015: 1-6, 2015.
11. Fu L, et al.: Transcorneal electrical stimulation inhibits retinal microglial activation and enhances retinal ganglion cell survival after acute ocular hypertensive injury. *Transl Vis Sci Technol.* 7: 1-11, 2018.
12. Yin H, et al.: Transcorneal electrical stimulation promotes survival of retinal ganglion cells after optic nerve transection in rats accompanied by reduced microglial activation and TNF- $\alpha$  expression. *Brain Res.* 1650: 10-20, 2016.
13. Morimoto T, Fukui T, Matsushita K, Okawa Y, Shimojyo H, Kusaka S, Tano Y, Fujikado T: Evaluation of residual retinal function by pupillary constrictions and phosphenes using transcorneal electrical stimulation in patients with retinal degeneration. *Graefes Arch Clin Exp Ophthalmol.* 244: 1283-1292, 2006.
14. Schatz A, Rock T, et al. Transcorneal electrical stimulation for patients with retinitis pigmentosa: a prospective, randomized, sham-controlled exploratory study. *Invest Ophthalmol Vis Sci.* 52: 4485-4496, 2011.
15. Schatz A, Pach J, et al. Transcorneal electrical stimulation for patients with retinitis pigmentosa: a prospective, randomized, sham-controlled follow-up study over 1 year. *Invest Ophthalmol Vis Sci.* 58: 257-269, 2017.
16. Bittner AK, et al. Longevity of visual improvements following transcorneal electrical stimulation and efficacy of retreatment in three individuals with retinitis pigmentosa. *Graefes Arch Clin Exp Ophthalmol.* 256: 299-306, 2018.
17. Rosenfeld P, Brown D, et al.: Ranibizumab for neovascular age-related macular degeneration. *N Engl J Med.*

1  
2  
3  
4  
5  
6  
7  
8  
9  
10  
11  
12  
13  
14  
15  
16  
17  
18  
19  
20  
21  
22  
23  
24  
25  
26  
27  
28  
29  
30  
31  
32  
33  
34  
35  
36  
37  
38  
39  
40  
41  
42  
43  
44  
45  
46  
47  
48  
49  
50  
51  
52  
53  
54  
55  
56  
57  
58  
59  
60

355: 1419 – 1431, 2006.

For peer review only

治験実施計画書番号： CCRC1804

(第 1.0 版)

作成日：2021 年 4 月 1 日

よくお読みください

患者さんへ

網膜色素変性を対象とした経皮膚電気刺激装置の  
有効性及び安全性を検証するシャム対照二重遮蔽比較試験  
～説明および同意文書～

この冊子には、経皮膚電気刺激装置という医療機器の、効果や安全性を確かめるための臨床試験（治験）についての詳しい説明が書かれています。

この冊子をよくお読みになり、この治験の目的や方法、医療機器について十分にご理解されたうえで、治験に参加されるか否かを決めてください。担当医師の説明やこの説明文書の中で、わからないことや心配なことなどがありましたら、どんなことでも遠慮なくお尋ねください。

## 目次

|     |                             |    |
|-----|-----------------------------|----|
| 1.  | 治験とは？                       | 3  |
| 2.  | 網膜色素変性と経皮膚電気刺激装置について        | 4  |
| 3.  | 治験の目的                       | 7  |
| 4.  | この治験の方法                     | 7  |
| 5.  | この治験の参加予定期間                 | 17 |
| 6.  | 予定人数                        | 17 |
| 7.  | 利益と不利益                      | 17 |
| 8.  | 他の治療法                       | 19 |
| 9.  | 治験への参加を中止する場合について           | 19 |
| 10. | 新たに重要な情報が得られた場合について         | 20 |
| 11. | 治験に関連した健康被害の治療について          | 20 |
| 12. | 治験に参加された場合の費用について           | 20 |
| 13. | カルテなどの医療記録の閲覧と参加者の秘密の保全について | 21 |
| 14. | 知的財産権と利益相反について              | 23 |
| 15. | 治験に参加いただくことは自由です            | 23 |
| 16. | 患者さんに守っていただきたいことについて        | 23 |
| 17. | 治験を審査する委員会                  | 24 |
| 18. | 治験に関する相談窓口                  | 26 |

治験実施計画書番号： CCRC1804

(第 1.0 版)

作成日：2021 年 4 月 1 日

## 1. 治験とは？

新しい医薬品・医療機器が世の中に出て、多くの患者さんに使われるためには、国から承認を得ることが必要とされています。そのため、その効果と安全性を何段階にもわたって慎重に調べます。まずは動物実験などによって医療機器の効果と安全性が確認されます。その後、健康な方や患者さんに使っていただき、効果や安全性を詳しく調べます。このように、開発の最終段階において、人を対象に効果や安全性を確かめ、厚生労働省に「医薬品・医療機器」として認めもらうため、申請の資料を集めることを目的とした試験を「治験」、その治験で使われる機器を「治験機器」と呼んでいます。





1  
2  
3  
4  
5  
6 治験は、一般の治療と異なり、研究的な側面があります。そのため、治験は参  
7  
8 加された方の安全や人権を守るために、「医薬品医療機器法」という法律と厚生  
9  
10 労働省が定めた「医療機器の臨床試験の実施の基準に関する省令（GCP）」を守  
11  
12 りながら行われます。また、当院の治験審査委員会（治験について審査する委員  
13  
14 会）で、この治験の内容に問題がないか、患者さんの人権が十分に守られている  
15  
16 か事前に審議されたうえで、治験の実施が認められています。

## 22 1-1 医師主導治験とは？

23  
24  
25 今回説明をさせていただく臨床試験は、「医師主導治験」と呼ばれるもので、  
26  
27 実際の診療に携わる医師が医学的必要性・重要性を検討の上、立案・計画して行  
28  
29 うものです。これまで日本では、医療機器を開発するための治験は、医療機器を  
30  
31 開発する会社のみが実施することができました。医師は医療機器を開発する会  
32  
33 社から依頼を受けて治験をする立場であり、外国での臨床試験の結果などから  
34  
35 「この患者さんにこの機器を使ったら効果があるのではないかと考えても、自  
36  
37 ら治験を計画して実施することは出来ませんでした。しかし、2002 年に法律  
38  
39 （薬事法）が改められ、医学的に必要と考えられる機器について、医師が自ら治  
40  
41 験を計画して実施することが出来るようになりました。

## 47 2. 網膜色素変性と経皮膚電気刺激装置について

48  
49 〈あなたの病気について〉

50  
51  
52 あなたの病気は、「網膜色素変性(もうまくしきそへんせい)」と診断されてい  
53  
54 ます。網膜色素変性は、目の奥(眼底)で光を感じる組織である網膜に異常がみ  
55  
56 られる病気で、4000~8000 人に 1 人の割合で起こるといわれています。眼  
57  
58  
59  
60

治験実施計画書番号： CCRC1804

(第 1.0 版)

作成日：2021 年 4 月 1 日

底の網膜で眼の中に入った光を感じ、その情報が脳へ送られて映像になります。網膜には 1 億数千万個もの視細胞という光を感知する細胞が集まって構成されています。網膜色素変性はこの視細胞が、遺伝的な要因により機能しなくなってしまう病気です。視細胞が働かなくなった部分は光を感じとれず、映像になりません。

最初に現れる症状は、夜や薄暗い屋内でものが見えにくくなる夜盲(やもう)です。その後、視野(しや)狭窄(きょうさく)が少しずつ進行し、見える範囲が周辺部分から中心に向かい狭くなっていきます。最近では夜でも明るい所が多いので、夜盲ではなく視野狭窄によって発病に気づく人も増えています。続いて視力低下を自覚するようになります。進行性の病気ですが、病状の進行速度には大きな個人差がみられます。症状の進行に伴う視野の狭窄を図 1 に示します。

図 1 網膜色素変性患者さんの視野

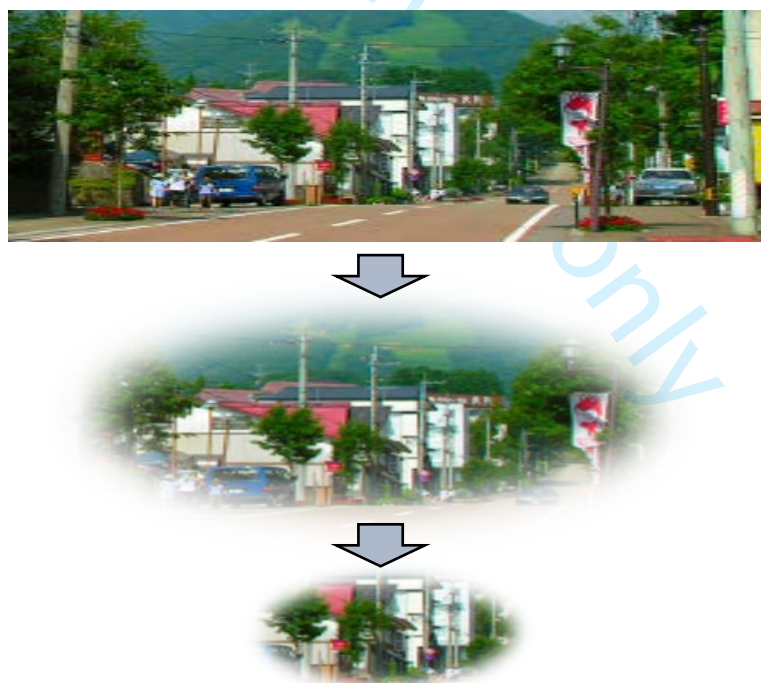

一番上は健康な人の視野。病気の進行と共に視野狭窄が進行し(中段及び下段)、視力も低下してきます。

1  
2  
3  
4  
5  
6 網膜の視覚機能がある細胞には二種類があり、暗い所での物の見え方に関係  
7  
8 している細胞（杆体細胞<sup>かんたいさいぼう</sup>といいます）と明るい所で細かいものを見分けたり、  
9  
10 色を識別する能力に優れていて、おもに視力に関係している細胞（錐体細胞<sup>すいたさいぼう</sup>と  
11  
12 います）です。網膜色素変性では、まず杆体細胞の機能が低下するため、夜盲  
13  
14 や視野狭窄が最初の症状になり、さらに病気が進むと錐体細胞に影響し、視力が  
15  
16 低下してきます。

### 21 22 〈あなたの病気の治療法について〉

23  
24 あなたの病気（網膜色素変性）に対しては、暗順応<sup>あんじゅんのう</sup>改善薬（アダプチノール）  
25  
26 や血流改善薬（ニバジール）、ビタミン剤、酸素が高い濃度になる部屋での一定  
27  
28 時間の滞在などが、対症療法（たいしょうりょうほう）的に処方されることもあり  
29  
30 ます。ただ、これらの薬や治療方法が病気の進行を確実に遅らせているという証  
31  
32 拠は、今のところ得られていません。

33  
34 経角膜電気刺激は、コンタクトレンズ型電極を黒目（角膜）の上、もう一方の  
35  
36 電極をこめかみに置き、電気刺激装置から電極を通して電気刺激をする方法で、  
37  
38 近年、ラットやウサギを用いた動物実験において、網膜の視細胞に対して神経保  
39  
40 護的に働くことがわかってきております。そしてこの電気刺激は、ある条件のも  
41  
42 と、繰り返し行うことで効果を得られることが分かってきています。実際にヨー  
43  
44 ロッパでは、同様の機序を持つ医療機器が認証を得て臨床使用されていますが、  
45  
46 日本国内ではまだ承認されておらず、使用することができません。

47  
48 また、電極を黒目（角膜）上に置くことで、角膜に傷がついたり、ドライアイ  
49  
50 になったり、不快感を生じることがあります。それを避けるため、今回は角膜上  
51  
52 ではなく皮膚に電極を貼り付けることで電気刺激を行います。

治験実施計画書番号： CCRC1804

(第 1.0 版)

作成日：2021 年 4 月 1 日

日本国内では 10 人の網膜色素変性の患者さんに参加頂いた第 II 相試験が終了しています。2 週間毎に 6 回 1 ミリアンペアによる電気刺激を網膜に与えることで、視力と視野(見える範囲)が治療前と比べて改善した結果を得ています。

さらに、患者さんの過去 5 年間のデータをもとに治療を行わなかった場合の視力の推移と、実際に治療を行った視力の推移を比較したところ、治療による視力改善によって長期的に視力を維持する効果が認められました。

また、電気刺激を行ったことによる身体への悪影響は認められませんでした。

### 3. 治験の目的

この研究の目的は、網膜色素変性の患者さんに対して経皮膚電気刺激療法を実施した際の、治療後の視機能への効果と安全性を調べることです。

### 4. この治験の方法

経皮膚電気刺激治療は、額<sup>ひたい</sup>と両眼の下の皮膚に電極をつけて、電気刺激装置から電極を通して電気刺激をする方法です。本治験では皮膚に電極を装着して刺激するため、角膜などの眼球への障害は無く、低侵襲で眼にやさしい治療です。この治験では、実際に電気刺激を行うグループと、電気刺激を行わないグループに 1:1 で分けて実施します。電気刺激を行わないグループをシャム群と呼びます。

グループ分けは、「無作為化(ランダム化)割り付け」という方法で行います。コンピューターで作成した乱数表を使って、ランダムにグループ分けをする方法です。どちらのグループに入るかは、あなたも担当医師も選ぶことも知ることできません。そのため、あなたが必ずしも希望するグループに入れない可能性

があります。

ご自分がどちらのグループに割り付けられたかが分かっていると、思い込みによって電気刺激の効き方が変わってしまうことがあります。このような思い込みの影響を取り除くため、どちらのグループに割り付けられたかを、あなたにはお知らせせずに治験を行います。あなたの担当医師もあなたがどちらのグループなのかを知ることができませんが、あなたの体調変化に担当医師が責任をもって対応します。

電気刺激を行うグループも行わないグループも図 2 の様に電極を 30 分間付けて頂きます。電気刺激は 1 ミリアンペアの電流を 30 分間流します。安全性の証明された範囲内の電流値ですので、危険性はほとんどありません。これらの療法は 2 週間ごとに 12 回実施します。

どちらのグループの方にも治験期間中に視覚機能に関するアンケートを計 4 回実施します。

シャム群とは・・・シャムとは見せかけの電気刺激のことです。電極を貼りますが電気刺激は行いません。思い込みによる影響を取り除き、効果や安全性を正しく判断するため世界的に認められている科学的な方法です。

#### < 刺激条件 >

電流強度：1 ミリアンペアあるいは 0 ミリアンペア

パルス幅：10 ミリセカンド/相 双極性あるいは無し

刺激頻度：20 ヘルツあるいは無し

治療時間：30 分

\* 家庭用の低周波電気によるマッサージ機器の最大電流は

20 ミリアンペアです。



図 2 皮膚電極の装着例

<この治験に参加出来る方・出来ない方>

以下のすべてに該当する方が治験に参加できます。ただし、2)、3) に関して、片眼（評価眼）が以下の基準を満たすこと（両目の場合は、右眼）。

- 1) 年齢が 20 歳以上、80 歳未満
- 2) 小数視力（通常の視力検査のことです）が 0.1 以上、0.7 以下
- 3) 視野がある程度ある方
- 4) 本治験の十分な説明を受け、ご自分の意思で同意書に署名される方
- 5) 2 週おきに 24 週間、その後 36 週目と 48 週目に来院可能な方
- 6) 適切な避妊を行うことができる方

また、上記に該当する方でも、以下のいずれかに該当する方は治験に参加できません。ただし、2)、5)、6) に関しては評価する眼が以下のいずれかに該当する方は参加できません。

- 1) 眼の病気に対する電気刺激治療を受けた方

- 2) 3 か月以内に白内障などの眼の中の手術を受けた方
- 3) 網膜色素変性用のお薬（ウノプロストン点眼薬、カルシウム拮抗薬、暗順  
 応改善薬）の使う量もしくは使い方を約 1 か月以内に変えた方
- 4) 治験期間中に使用する予定のお薬（散瞳薬、点眼麻酔薬など）に対し、ア  
 レルギーを起こしたことがある方
- 5) 網膜色素変性の他に以下の病気が眼にあると診断された方
- 硝子体黄斑牽引症候群、黄斑浮腫、黄斑前膜、後部ぶどう腫を伴う強  
 度近視のある黄斑病変、糖尿病網膜症、外眼部の炎症、感染症、重  
 度のドライアイ、網膜中心動脈閉塞症、後部虚血性視神経症、眼の  
 水晶体が茶色より濃く濁った核白内障、視力に重大な影響を及ぼすよ  
 うな前囊下及び後囊下白内障、後発白内障、視神経疾患
- 6) 最近3年間の視力検査などのデータに変化のない方
- 7) ペースメーカーもしくは除細動器が植え込まれている方
- 8) 悪性腫瘍と診断され治療中もしくは治療終了後5年以内の方
- 9) 認知症、神経疾患と診断され治療中の方
- 10) 糖尿病のコントロールが悪い方、血糖値が高い（HbA1cが10%  
 を超えている）方
- 11) 高血圧の治療を行っているが血圧が高い（最高血圧が180 mmHg以  
 上、かつ/又は、最低血圧が110 mmHg以上）方
- 12) 肝臓及び腎臓の機能に障害がある方
- 肝臓から出る酵素のAST（GOT）、かつ/又は、ALT（GPT）が施設  
 基準値の3倍を超える方

治験実施計画書番号： CCRC1804

(第 1.0 版)

作成日：2021 年 4 月 1 日

- 腎臓の機能を知る指標の血清クレアチニンが施設基準値の 1.5 倍を超える方

13) 妊娠、授乳中（授乳を中止する場合も含む）又は本治験中に妊娠を希望している方

治験参加にご同意いただいてから、治療前の視力検査、眼圧測定、眼底検査などの検査を行います。治療開始後は 2 週毎に、24 週間（約 6 か月間）の通院による治療を受けて頂き、その後 12 週間毎に 2 回通院して頂きます。通院時に行う検査としては、視力検査、眼圧測定、眼底検査、視野検査、などがあります。



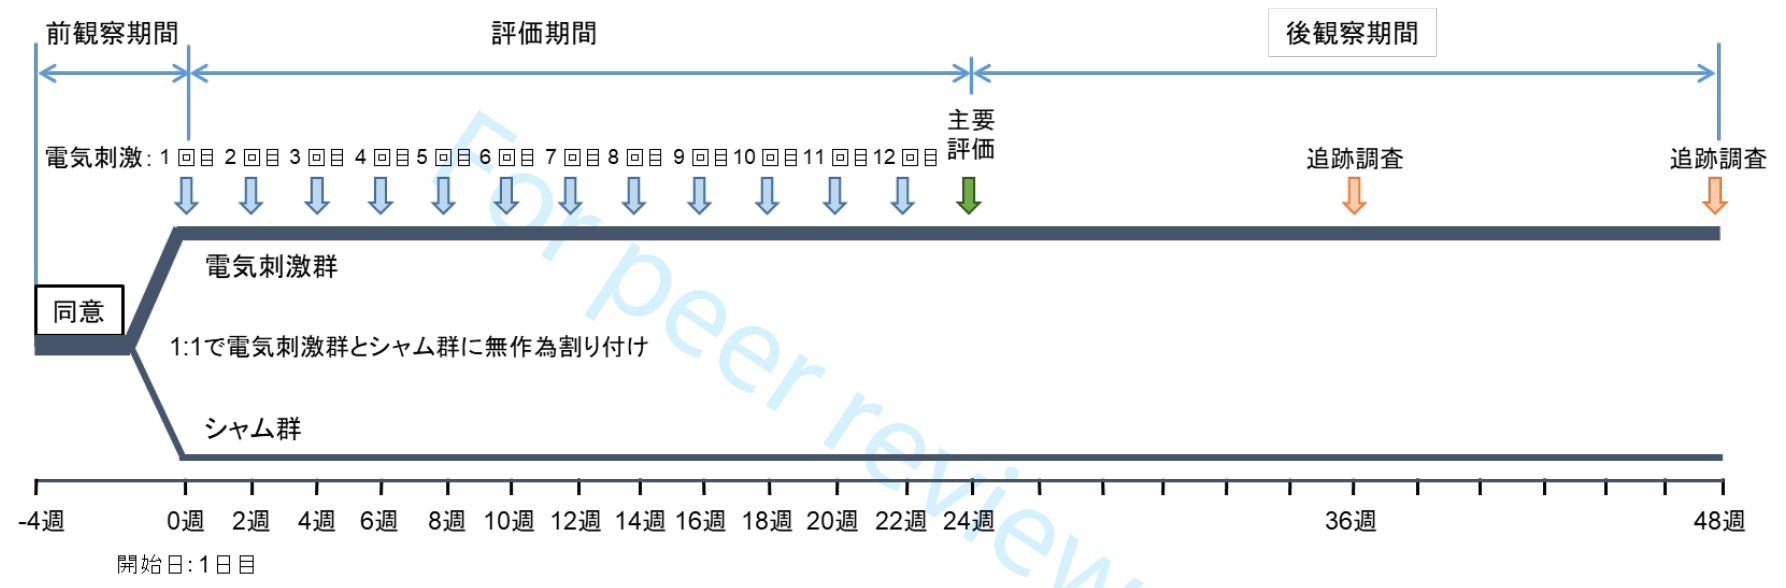

- ↓ (Blue) : 通院
- ↓ (Green) : 治療効果を見る通院日
- ↓ (Orange) : 追跡調査のための通院日

治験実施計画書番号： CCRC1804

(第 1.0 版)

作成日：2021 年 4 月 1 日

## 検査スケジュール

この治験では、次項の表 1.に示されている検査を行います。また、この治験の検査項目及び検査頻度は通常の治療の際に行う検査項目及び検査頻度とほぼ変わらないため、治験に参加したことにより通院の負担が極端に多くなるということはありません。

新型コロナウイルス感染症の影響（ご自身の感染、濃厚接触者と判断される、治験実施施設の外来が閉鎖等）で来院が出来なくなった場合でも治験は継続いたしますので、担当医師又は治験コーディネーターにご連絡下さい。次の来院等のスケジュールについてご相談させていただきます。

また、スクリーニング検査期間に最近3年間であなたの見えかたに変化がなかったかどうかを以前受診されていた眼科に確認することがあります。

効果に関する眼の検査（logMAR 視力；矯正小数視力、ETDRS 視力、静的視野検査 10-2 プログラム、静的視野検査 エスターマンテスト、光干渉断層計；網膜の検査）は片眼（評価眼）にのみ実施しますが、安全性に関する眼の検査（細隙灯検査、眼圧・眼底検査）は両眼に実施します。





1  
2  
3  
4  
5  
6 なお、本治験に関わるデータは、同意取得前のデータも使用する場合があります。  
7  
8  
9

10 <表 1.の注釈説明>

- 11  
12 a) 自覚症状は経皮膚電気刺激治療実施前後に実施します。36 週目及び 48  
13 週目ではその間の体調の変化に関しましてもお聞きします。  
14  
15 b) 血圧はあなたがこの治験に入れるかどうかの検査（スクリーニング検査）時  
16 に測定し、治験期間中は病院に来られた時に必要に応じて測定します。  
17  
18 c) 臨床検査はあなたの全身状態の確認のため 11 ミリリットル程度採血して実  
19 施します。検査項目は、一般的な健康診断時の項目（ALT(GPT)、AST(GOT)、  
20 ALP、総ビリルビン、尿素窒素（BUN）、血清クレアチニン、<sup>ヘモグロビンエーワンシー</sup>Hb A1c  
21 、赤血球、白血球、ヘモグロビン、血小板）です。  
22  
23 d) 眼鏡を掛けての視力測定を実施します。測定値から logMAR 視力を算出しま  
24 す。  
25  
26 e) スクリーニング検査で、静的視野検査の計測値で信頼性が確認できなかった  
27 場合には、再測定する場合があります。  
28  
29 f) 光干渉断層計（網膜の検査）と眼底検査は散瞳してから実施します。  
30  
31 g) スクリーニング検査期間及び治療開始後 12,24,48 週間目あるいは治験中  
32 止時に視覚機能に関するアンケート（NEI VFQ 25 コンポ 9）にお答えい  
33 ただきます。アンケート用紙をお渡しいたしますので、ご自身で記載いた  
34 だき担当医師又は治験コーディネーターにお渡してください。  
35  
36 h) 妊娠可能な女性のみ尿中 hCG 検査を実施します。  
37  
38 i) 有害事象とは副作用など好ましくないすべての事象のことです。治験治療と  
39 の因果関係は問いません。  
40  
41 j) スクリーニング検査は複数日に分けて実施することも可能です。  
42  
43  
44  
45  
46  
47  
48  
49  
50  
51  
52  
53  
54  
55  
56  
57  
58  
59  
60

治験実施計画書番号： CCRC1804

(第 1.0 版)

作成日：2021 年 4 月 1 日

あなたが他の病院に通院されている場合は、その病院名と病名、使用しているお薬をお知らせ下さい。また、薬局等で購入して使用しているお薬がある場合もお知らせ下さい。これらは、治験を安全に行うために大切なことです。また、あなたが他の病院に通院されている場合は、この治験に参加していることをその病院にお知らせすることがありますので、ご了解下さい。

## 5. この治験の参加予定期間

この治験の参加予定期間は、前観察期間（31日間）、治療期間（24週間）及び後観察期間（24週間）の合計約12ヶ月となります。

また、この治験を行う期間は、2021年4月～2023年3月です。患者さんへのご案内は、2021年4月～2022年3月まで行います。

## 6. 予定人数

この治験は、日本全国で行われ、合計50名の網膜色素変性の患者さんに参加していただく予定です。

## 7. 利益と不利益

＜予測される利益と不利益＞

### 1) 利益（効果など）について

この治療を行うことによって、錐体細胞死による視機能の障害の進行速度を緩徐にすることが期待できます。あなたがこの治験に参加する事で得られた情報が将来的に網膜色素変性症の患者さんの助けになる可能性があります。しか

し、あなた自身が何らかの利益を得られる保証はありません。

## 2) 不利益（副作用など）について

以下のような不利益や副作用が考えられます。まず、治療を行ったにもかかわらず十分な効果が得られない場合があります。電気刺激ではとても少ない量の電流を流します。人によっては電極装着部位にピリピリとしたわずかな刺激を感じたり、視界の中に疑似光覚（フォスフェンとも呼びます）と呼ばれる光の波（太陽やストロボなど強い光を見た後に生じる光の残像の様なもの）を感じたりする方がいます。電気刺激を終了するといずれも感じなくなります。

今回の治験では、安全性の証明された範囲内の電流を流しますので、電気刺激自体の合併症が生じる可能性は非常に低いと推測されますが、本治験で使用する治療機器は治験機器提供者（有限会社メイヨー）と共同で新たに開発・作製したものであるため、眼及び眼周辺の器官に対する影響は厳密には確定していません。そのため眼及び眼周辺の器官において有害事象（何らかの症状）が発生する可能性は否定できません。予測される有害事象としては、電極装着部位に一致した皮膚の炎症を生じる可能性があります。軽度の炎症でしたら自然に治りますが、万が一重度の炎症を生じた場合には、適切な治療を行います。

治験に入って頂くための臨床検査を実施する際、採血を実施します。採血時に注射針をさすため、チクッと痛みを感じます。また、止血が不十分だと内出血を起こすことがあります。その際は自然に吸収されます。

この治験ではシャム群を設定しております。シャム群の治療になった場合も診察や検査も電気刺激を受けられる方と同様に通院していただきます。

治験実施計画書番号： CCRC1804

(第 1.0 版)

作成日：2021 年 4 月 1 日

## 8. 他の治療法

網膜色素変性という病気は、現在有効な治療法がありません。これまでと同様に通院していただき、その時の視機能を最大限活用できるよう支援をします。眼の合併症に関しても、適切に治療いたします。

## 9. 治験への参加を中止する場合について

あなたに治験参加の同意をいただいた後でも、この治験で事前に決められている基準に合わないことが判った場合には、治験への参加をお断りしたり、治験を中止することがありますのでご了承ください。

治験機器治療を開始した後に以下に該当することがわかった場合には、この治験への参加を中止させていただきますのでご了承ください。

- ・ 好ましくない症状などが発現し、治験機器の使用を中止すべきであると、担当医師が判断した場合
- ・ 病気の状態が変化（悪化）し、この治験を続けることが困難であると、担当医師が判断した場合
- ・ この治験で使用が禁止されている薬や療法を行った場合や行わざるを得なくなった場合
- ・ 転院や引越しなどにより、規定の通院を続けられない場合
- ・ その他、担当医師が治験を中止すべきであると判断した場合

また、これらの他に、治験の安全性に重大な影響があると考えられる情報が得られた場合など、治験を中止・中断させていただく場合もあります。治験を中止した場合にはその理由を説明させていただき、健康上に問題がないかを確認さ



せていただきます。

## 10. 新たに重要な情報が得られた場合について

この治験の参加の継続について、あなたの意思に影響を与える可能性がある  
と判断される、重要な有効性や安全性等に関する新しい情報が得られた場合に  
は、速やかにお知らせします。その場合、引き続き治験に参加するかどうか、改  
めて判断していただくことになります。

### 11. 治験に関連した健康被害の治療について

この治験は、科学的に計画され慎重に行われますが、あなたが治験参加に同意  
された後、治験中又は治験が終わった後に、この治験が原因となった健康障害が  
生じたときには、担当医師又は治験コーディネーターまでお知らせください。そ  
の時点で最善と思われる処置を行い、適切に対処した上で補償します。その際の  
医療費の一部については、あなたが加入している健康保険が使用されますので、  
一部あなた自身にご負担いただくことになります。ただし、健康被害に関して虚  
偽の申告をしたり、担当医師の指示に従わず、その障害があなた自身の過失や故  
意によるものである場合には、補償が受けられないこともあります。補償につい  
て詳しく説明を受けたい場合は、担当医師あるいは「18. 治験に関する相談窓  
口」にお問い合わせ下さい。補償について詳しい内容をご希望の方は資料をお渡  
しします。

### 12. 治験に参加された場合の費用について

#### 1) 治験期間中の医療費について

治験実施計画書番号： CCRC1804

(第 1.0 版)

作成日：2021 年 4 月 1 日

この治験に参加いただいた場合、この治験機器による治療自体は治験機器提供者（有限会社メイヨー）より無償で提供され、それに対する費用は発生しません。しかし、診察料や検査代、通常使用されている薬剤等の費用は従来どおり健康保険の種類に応じてご負担していただくことになります。

## 2) 治験中の費用の負担軽減について

治験に参加していただけることになった場合、治験のための診察や検査のために、来院する回数が通常の診療より増え、それに伴い交通費などの負担が増えることがあります。この負担を軽くするため、この治験の検査スケジュール表で決められた日の来院 1 回につき 7,000 円をお支払いします。お支払いは、病院からあなたの指定する銀行又は信用金庫の口座に振り込ませていただきます。

また、かかりつけの病院や他の医療機関で治療を受けた場合に、他院の担当医師へ電話や手紙で連絡をとり、医療情報の提供を求める場合があります。その際に他院から患者さんの情報を提供していただくにあたって、情報提供料としてあなたの費用負担が増える場合があります。その際は、あなたに給付される負担軽減費の中からお支払いいただくようお願い致します。

## 1 3. カルテなどの医療記録の閲覧と参加者の秘密の保全について

治験にご協力いただいた個人が特定されるような情報は厳重に保護され、外部に出されることはありません。患者さんから得られたデータがコード番号などに置き換えられ、報告書等でその患者さんのものであると特定されないことがないような取扱いをいたします。

この治験の結果およびあなたの過去 5 年間の検査結果の解析結果（以下、「治験のデータ」とします）は、国（厚生労働省）から経皮膚電気刺激療法を網膜色

素変性の治療法として認めってもらうために、厚生労働省に提出されることとなります。またこの治験機器の効果や安全性についてより詳細に検討するために、治験のデータとして使用された検査・画像などの治験機器の評価に必要なデータを外部の機関へ提出することがあります。さらに、この治験から得られた情報は、各地の病院から集められた記録をまとめて、学会や医学雑誌等に公表されることもあります。しかし、いずれの場合も、あなたのお名前などが用いられることはなく、あなたの個人情報（氏名、住所、電話番号等）は秘密事項として保護され、外部に漏れないように努めます。

また、治験がきちんと行われているかどうかを調べるために、治験機器の開発支援機関の担当者、この病院の治験審査委員会および厚生労働省など規制当局の職員が、カルテなどのあなたの医療に関する記録を閲覧することがあります（他科の診療記録や治験参加以前の期間も含みます）。このような場合でもこれらの関係者には秘密を守る義務が課せられており、患者さんのプライバシーは守られます。

さらに、他の医療機関で治療を受けた場合も、他院の担当医師へ電話や手紙で連絡をとり、医療情報の提供を求める場合があります。あなたがこの説明文書の最後にある同意文書に署名することにより、記録を閲覧することおよび他の医療機関からの情報収集に関しても承諾していただいたこととなります。

あなたは、診療情報の利用についていつでも同意を取り消すことができますが、その後はこの治験に参加いただけなくなりますのでご了承ください。同意を取り消したい場合は担当医師又は病院の治験コーディネーターにお伝えください。なお、同意を取り消すまでに収集された治験データは、上記と同様に利用されますが、同意を取り消された後は、この治験が正しく行われたかどうかを確認するような場合を除いて、あなたの診療情報が利用されることはありません。

治験実施計画書番号： CCRC1804

(第 1.0 版)

作成日：2021 年 4 月 1 日

#### 1 4. 知的財産権と利益相反について

本治験の結果が特許権等の知的財産を生み出す可能性があります。その場合の知的財産権は研究者もしくは所属する研究機関に帰属します。また、本治験の実施に関して、利益相反\*（起こりうる利害の衝突）が存在しないことを確認しています。

\*利益相反とは：たとえば製薬会社や医療機器製造会社から資金提供その他を受けている場合に自己や製薬会社、医療機器製造会社の利益を図り、患者さんの安全を損なったりデータの解釈をゆがめてしまう行為のことです。

#### 1 5. 治験に参加いただくことは自由です

この治験に参加するか否かの決定は、あなた自身の意思に委ねられます。また、治験に参加している途中でも、いつでも自由にやめることができます。もし参加していただかなくても、あなたが今後の治療を受ける上で不利な扱いを受けることは決してありません。

#### 1 6. 患者さんに守っていただきたいことについて

この治験への参加に同意していただいた場合は、次の事項をお守りください。

- 1) 治験参加期間中は、治験のスケジュールに従ってください。
- 2) 治験期間中に新型コロナウイルス感染症であると診断された場合および濃厚接触者と判断された場合は、出来るだけ早く担当医師又は治験コーディネーターに電話でご連絡下さい。新しい来院日を検討しお知らせいたします。
- 3) 現在、他の診療科や病院を受診している場合、またはくすりを飲んでいる

場合は、担当医師又は治験コーディネーターにその状況を詳しくお話下さい。その治療を行っている医師に、あなたがこの治験に参加されていることをお伝えさせていただきます。

また、市販のくすりを飲む場合も、前もって担当医師又は治験コーディネーターにご相談ください。

- 4) 治験中に行われる検査は、あなたの症状の変化や副作用を知るうえで大変重要なものになりますので、担当医師及び治験コーディネーターの指示に従って受けてください。
- 5) 治験機器を使用している間に、体調の変化など何か変わったことがあった場合は、担当医師あるいは治験コーディネーターにお知らせください。
- 6) 治験参加に同意いただいてから治療開始後 48 週の最終観察が終了するまでの治験参加期間は他の試験には参加しないでください。
- 7) その他にも、担当医師からの注意事項や指示にしたがってください。

## 17. 治験を審査する委員会

この治験は、以下の治験審査委員会で、科学のおよび医学的な面だけでなく、患者さんの安全や人権も含めた倫理的な面からも審査されています。治験審査委員会は、医療を専門としない委員や、当院と利害関係のない委員も含まれていません。

- 1) 名称：千葉大学医学部附属病院 治験審査委員会
- 2) 設置者：千葉大学医学部附属病院長
- 3) 所在地：〒260-8677 千葉県千葉市中央区亥鼻 1-8-1

治験を開始した後も、上記の内容が変更された場合、重篤な副作用の発現といった安全性情報が得られた場合など、この治験を継続して良いかを、当院の病院

治験実施計画書番号： CCRC1804

(第 1.0 版)

作成日：2021 年 4 月 1 日

1  
2  
3  
4  
5  
6 長からの依頼に応じて審査します。  
7

8  
9 審査の結果は当院の病院長に報告され、院長はその報告内容を基<sup>もと</sup>に当院での  
10  
11 治験の開始、継続を決定します。  
12

13  
14 なお、治験審査委員会の手順書（審査の進め方を示した文書）、議事概要（話  
15  
16 し合いの記録）や委員のリストなどの情報について知りたい場合は、ホームペー  
17  
18 ジ上でご確認ください。（URL:<http://www.ho.chiba-u.ac.jp/>）  
19  
20  
21  
22  
23  
24  
25  
26  
27  
28  
29  
30  
31  
32  
33  
34  
35  
36  
37  
38  
39  
40  
41  
42  
43  
44  
45  
46  
47  
48  
49  
50  
51  
52  
53  
54  
55  
56  
57  
58  
59  
60



治験実施計画書番号：CCRC1804

(第 1.0 版)

作成日：2021 年 4 月 1 日

|     |
|-----|
| 医師用 |
|-----|

## 同意文書

私は、「網膜色素変性を対象とした経皮膚電気刺激の有効性及び安全性に関する検証的試験」に参加するにあたり、治験の内容について説明を受け、十分に理解した上で、自らの自由意思により本治験に参加することに同意します。

また、治験に関する負担軽減費の支払いを受けることに

同意します

同意しません（負担軽減費はいただきません）

（どちらかの口にチェックしてください）

附随研究：私の過去のカルテ上の記録を附随研究に使用することに

同意します（使用を許可します）

同意しません

（どちらかの口にチェックしてください）

同意日：西暦 \_\_\_\_\_ 年 \_\_\_\_\_ 月 \_\_\_\_\_ 日

本人（署名又は記名捺印）： \_\_\_\_\_

担当医師 説明日：西暦 \_\_\_\_\_ 年 \_\_\_\_\_ 月 \_\_\_\_\_ 日 署名： \_\_\_\_\_

説明補助者 説明日：西暦 \_\_\_\_\_ 年 \_\_\_\_\_ 月 \_\_\_\_\_ 日 署名： \_\_\_\_\_



病院用

## 同意文書

私は、「網膜色素変性を対象とした経皮膚電気刺激の有効性及び安全性に関する検証的試験」に参加するにあたり、治験内容について説明を受け、十分に理解した上で、自らの自由意思により本治験に参加することに同意します。

また、治験に関する負担軽減費の支払いを受けることに

同意します

同意しません（負担軽減費はいただきません）

（どちらかの口にチェックしてください）

附随研究：私の過去のカルテ上の記録を附随研究に使用することに

同意します（使用を許可します）

同意しません

（どちらかの口にチェックしてください）

同意日：西暦 \_\_\_\_\_ 年 \_\_\_\_\_ 月 \_\_\_\_\_ 日

本人（署名又は記名捺印）： \_\_\_\_\_

担当医師 説明日：西暦 \_\_\_\_\_ 年 \_\_\_\_\_ 月 \_\_\_\_\_ 日 署名： \_\_\_\_\_

説明補助者 説明日：西暦 \_\_\_\_\_ 年 \_\_\_\_\_ 月 \_\_\_\_\_ 日 署名： \_\_\_\_\_

治験実施計画書番号：CCRC1804

(第 1.0 版)

作成日：2021 年 4 月 1 日

患者さん用

## 同意文書

私は、「網膜色素変性を対象とした経皮膚電気刺激の有効性及び安全性に関する検証的試験」に参加するにあたり、治験の内容について説明を受け、十分に理解した上で、自らの自由意思により本治験に参加することに同意します。

また、治験に関する負担軽減費の支払いを受けることに

同意します

同意しません（負担軽減費はいただきません）

（どちらかの口にチェックしてください）

附随研究：私の過去のカルテ上の記録を附随研究に使用することに

同意します（使用を許可します）

同意しません

（どちらかの口にチェックしてください）

同意日：西暦 \_\_\_\_\_ 年 \_\_\_\_\_ 月 \_\_\_\_\_ 日

本人（署名又は記名捺印）： \_\_\_\_\_

担当医師 説明日：西暦 \_\_\_\_\_ 年 \_\_\_\_\_ 月 \_\_\_\_\_ 日 署名： \_\_\_\_\_

説明補助者 説明日：西暦 \_\_\_\_\_ 年 \_\_\_\_\_ 月 \_\_\_\_\_ 日 署名： \_\_\_\_\_

## 治験機器の提供及び管理に関する手順書

網膜色素変性を対象とした経皮膚電気刺激装置の  
有効性及び安全性を検証するシャム対照二重遮蔽比較試験

自ら治験を実施する者

〇〇病院

〇〇科

〇〇 〇〇

治験調整医師（代表）

千葉大学医学部附属病院

特任教授 山本 修一

治験機器提供者

有限会社メイヨー



1  
2  
3  
4 12.4. 未使用治験機器及び使用済治験機器の返却 ..... 12  
5  
6 13. 治験に関係する医師等に対するガイダンス ..... 13  
7 13.1. 禁忌 ..... 13  
8 13.2. 警告 ..... 13  
9 13.3. 注意 ..... 13  
10  
11 14. 資料等の保管 ..... 13  
12  
13 15. 改訂履歴 ..... 14  
14  
15  
16  
17  
18  
19  
20  
21  
22  
23  
24  
25  
26  
27  
28  
29  
30  
31  
32  
33  
34  
35  
36  
37  
38  
39  
40  
41  
42  
43  
44  
45  
46  
47  
48  
49  
50  
51  
52  
53  
54  
55  
56  
57  
58  
59  
60

For peer review only

## 1. 目的及び適用範囲

本手順書は、自ら治験を実施する者、治験機器管理者、治験機器提供者及び治験調整医師（治験調整委員会）が、治験機器の授受、取り扱い、保管・管理、保守、治験機器の返却等を適切に行うための手順及びその他必要な事項を定めるものである。

## 2. 用語の定義

本手順書においては、下記の通り定める。

- ・治験責任医師：自ら治験を実施する者をいう。
- ・治験機器管理者：実施医療機関の長から指名された者をいう。
- ・治験機器管理補助者：治験責任医師から指名された者でアンブラインドスタッフとなる。
- ・治験調整医師：複数の実施医療機関において治験を行う場合に、自ら治験を実施する者により調整業務の委嘱を受けて当該業務を行う医師又は歯科医師をいう。
- ・治験調整委員会：複数の実施医療機関において治験を行う場合に、自ら治験を実施する者により調整業務の委嘱を受けて当該業務を行う医師又は歯科医師で構成される委員会をいう。
- ・CRC：治験コーディネーター
- ・CRA：臨床開発モニター
- ・アンブラインド（非盲検）スタッフ：治験機器の治療用設置・返却及び治験機器による治療の施行のみに係る治験分担医師、治験機器管理補助者及びCRC等をいい、治験責任医師により指名される。アンブラインドスタッフは、アクセスが厳密に管理されたEDCの割付情報を知ることが出来る。アンブラインドスタッフは治験機器の不具合報告を治験機器提供者に実施し、治験責任医師に不具合があった旨の報告をする。アンブラインド治験分担医師及びCRCは治験機器による治療の準備、施行及び治験機器の片付け以外の治験業務には関与しない。アンブラインドの治験機器管理補助者は治験機器の管理を補佐する。
- ・ブラインド（盲検）スタッフ：被験者の割付情報に関してキーオープン（開鍵）まで知り得ない治験構成員（スタッフ）である治験調整医師、治験責任医師、治験機器管理責任者、CRC及び眼科視能訓練士等をいう。治験機器管理責任者は、治験機器の納品・返却を管理するが、盲検維持のため、治験機器の出庫や返却管理はアンブラインド治験管理補助者に一任し、治験機器管理の整合性に責任を負う。

## 3. 治験機器の概要

### 3.1. 名称

一般名（仮）：経皮膚電気刺激装置

販売名（仮）：皮膚電極網膜賦活化刺激装置（眼科用電気刺激装置）

### 3.2. 形状、構造及び寸法

形状、構造：詳細は治験機器概要書による。

本体、電極パッド、電極リード線、ACアダプター（含む、電源コード）から構成される。

寸法：本体 140×100×69 mm

重量：約 300 g

### 3.3. 滅菌

なし

### 3.4. 治験機器製造及び提供者

有限会社メイヨー

〒492-8213 愛知県稲沢市高御堂 2-25-22

Tel: : 0587-33-0120

## 4. 包装仕様

### 4.1. ラベル

治験機器の外箱及び内包に次のラベル表示がされている。

|                                                                                |                         |
|--------------------------------------------------------------------------------|-------------------------|
| <b>治験用</b>                                                                     | <b>経皮膚電気刺激装置（型番号記載）</b> |
| <b>&lt;注意&gt;</b><br>・未使用機器は破棄せずに保管して治験機器提供者に返却してください。<br>・治験以外には絶対使用しないでください。 |                         |
| <b>&lt;保存条件&gt;</b> 高温、多湿、直射日光を避けて保管すること。                                      |                         |
| 治験調整医師：山本 修一<br>職名：特任教授<br>住所：千葉県千葉市中央区亥鼻 1-8-1                                |                         |
|                                                                                | 製造番号： _____             |

治験責任医師は、ラベルに治験調整医師の職名及び経皮膚電気刺激装置の製造番号（機器番号）が記載されていることを確認する。

### 4.2. 輸送時の包装形態

<内包> エアパックによる包装

<外箱> 段ボール箱

## 5. 保存条件

- 1) 室温で保存する。
- 2) 開封後は直射日光及び高温・高湿を避けること。
- 3) 保管は治験機器一式を明確に識別し保存する。電源を OFF にし、コンセントから外して上記環境下で安全に保管する。機器に関し異常を発見した場合は、治験責任医師、治験分担医師もしくは治験機

器管理者から速やかに有限会社メイヨーに連絡をし、点検により異常処置をして結果を治験担当医師に報告する。尚、治験機器管理者が予備機を代替提供する場合はその旨の記録を治験機器管理表に残す。

## 6. 治験機器の管理方法

### 6.1. 治験機器の納入準備及び依頼

- 1) 治験責任医師は、原則、納入希望日の7営業日前までに、「治験機器提供依頼書（様式1）」により、治験機器提供者及び治験調整医師（代表）に治験機器の納入希望数量、納入先、納入希望日時等を連絡する。

### 6.2. 治験機器の納入

- 1) 治験責任医師又は治験機器管理者は、「治験機器納入書 兼 受領書（様式2）」とともに治験機器、治験機器の製造年月日、製造数量等の製造に関する記録及び治験機器の品質に関する試験の記録等を治験機器提供者から受領する。提供された治験機器（電気刺激装置、電極コード、附属品一式及び電極パッド）の各数量及び治験機器に損傷等がないかを確認後、通電し各種ランプ及び液晶ディスプレイが正常に表示される等の動作確認を実施する。問題がなければ必要項目を治験機器管理表に記載し、以後の治験機器の出納を管理する。
- 2) 問題がないことを確認した上で、治験責任医師は、「治験機器納入書 兼 受領書（様式2）」を治験機器提供者へ提出し、原本を適切に保管する。
- 3) 納入時に問題があった場合は、治験機器提供者に問い合わせをするとともに、11.9及び11.10の手順に従い、「不具合等報告書（不具合・返却・紛失・廃棄） 兼 回収書（様式3）」の作成及び当該治験機器を治験機器提供者に返却する（3.4に送付先住所）。

### 6.3. 治験機器の追加納入

治験機器管理者は、治験機器の追加納入が必要となった場合、治験調整医師に連絡する。追加納入に関する手順は、本手順11.1に準ずる。

### 6.4. 治験機器の保管・管理

治験機器管理者は本手順8. 保存条件に従い、治験機器を適切に保管・管理する。

### 6.5. 治験機器出庫の準備

治験機器管理者・治験機器管理補助者は、最初の被験者の同意取得日までに、治験機器の出庫指示等の方法を治験責任医師と相談の上、決定する。

### 6.6. 治験機器の出庫

治験機器管理者は、治験責任医師又は治験分担医師の出庫指示に従って治験機器を出庫する。その際、治験機器管理表に必要事項を記載する。



- 1) 出庫指示の方法は、治験機器管理者と治験責任医師が協議して決定するが、治験責任医師、治験分担医師又は CRC が被検者の来院予定表を治験機器管理者に提出することで、出庫指示とすることが出来る。被検者の来院予定が変更になった場合は、治験責任医師、治験分担医師又は CRC が治験機器管理者に連絡する。
- 2) 治験機器管理者あるいは治験機器管理補助者、アンブラインドスタッフは、治験責任医師又は治験分担医師の出庫指示に従って治験機器を出庫する。その際、治験機器管理表に必要事項を記載する。

## 7. 使用方法

本治験機器（MyTES30 改良型）には細かな設定をデフォルトとして組み込んであり、通常の治療は電源投入後に 2 プッシュで開始できる。

操作は、TES 操作マニュアル：治療群両眼用（付録 1）及びシヤム群両眼用（付録 2）の手順に従い実施する。なお、治療群両眼用及びシヤム群両眼用のマニュアルの手順はステップ S8 及び T8「デフォルト設定変更」とステップ S10 及び T10 の電極コードが異なる以外共通である。

### 7.1. 治験機器の使用前点検

以下の作業・操作（7.1.～7.6.）はアンブラインドスタッフが実施し、盲検性を確保するためにブラインドスタッフは治療を実施する場所の近辺に立ち入らない。

- 1) 治験機器一式を（シヤム及び治療用リード線及び電極を含む）保管庫から出庫し、搬出者は治験機器管理表（本体）及び（電極パッド）に必要事項を記録し、使用前点検を実施する。
- 2) 使用前点検は治療用リード線を用い、TES 操作マニュアルの治療前点検の手順（ステップ 1～5）に従い治験機器が正常に作動することを確認し、点検実施者が記録する（治験機器管理表（本体））。
- 3) 点検実施者は治験機器による治療準備を実施するアンブラインドスタッフに治験機器一式を引き渡す。

### 7.2. 使用前準備

- 1) AC アダプターを本体に接続し、電源コードを壁面等の商用電源のコンセントに接続し、被験者に割付けられた電極リード線を本体の電極接続コネクタ（R, COM, L）に接続する。使用しない電極リード線を盲検維持のため保管する。例えば、治験機器の保管庫に戻し施錠し保管する。
- 2) 電極パッド装着前、被験者の顔の皮脂や化粧等、良く落とす。
- 3) 電極パッドを装着する。
  - ① 両眼治療時：被験者の両眼の下眼瞼耳側及び前額部の中央に電極パッドを装着し（図 A）、電極パッドの突起に電極と機器を接続するケーブルを接続する。
  - ② 片眼治療時：被験者の治療眼の真上の額部及び治療眼瞼真下の頬に黒眼部分が電極パッドのほぼ左右の中心になるように装着し（図 B）、電極パッドの突起に電極と機器を接続するケーブルを接続する。
- 4) 電源スイッチ（3）を ON にして装置の電源を入れる。本体の液晶ディスプレイ（10）に「右 1000  $\mu$ A」（上段）と「左 1000  $\mu$ A」（下段）が表示される。

- 5) 「非常停止ボタン（図3の7）を2回押し、ディスプレイを「断線検知」画面にし、ジョグスイッチ（図3-8：ダイヤル）で断線検知の無効（シャム群）もしくは有効（治療群）を選択する。

シャム群：「断線検知」無効を選択

治療群：「断線検知」有効を選択

- シャム群として無効を選択すると、電極コードに電流が流れていないことを検知せず、治療時間タイマーのカウントダウンが開始・継続し、治療時間経過後にディスプレイに「治療終了」が表示される。
- 治療群として有効を選択すると、予期せぬ電極コードの断線及び電極パッドのはく離による通電遮断が検出可能となる（「断線検出時」の項参照）。

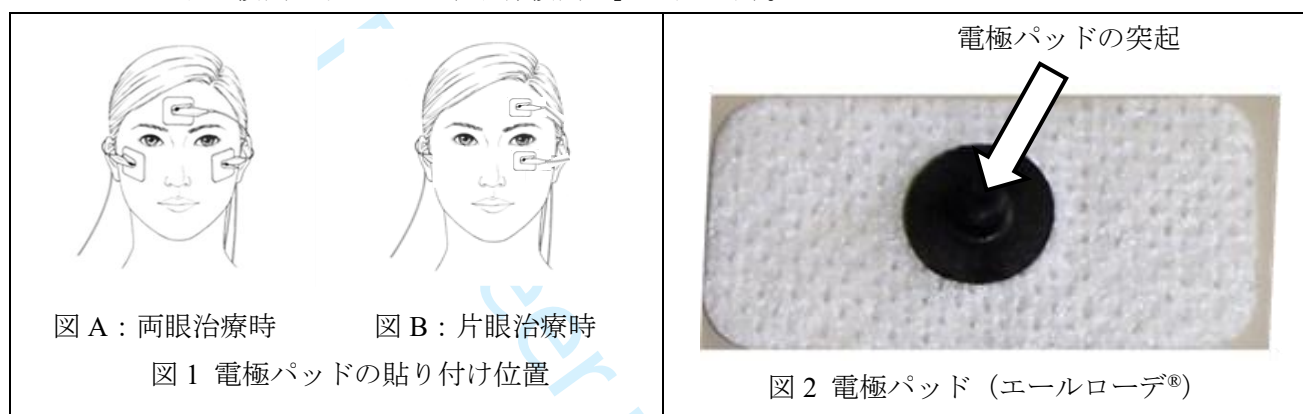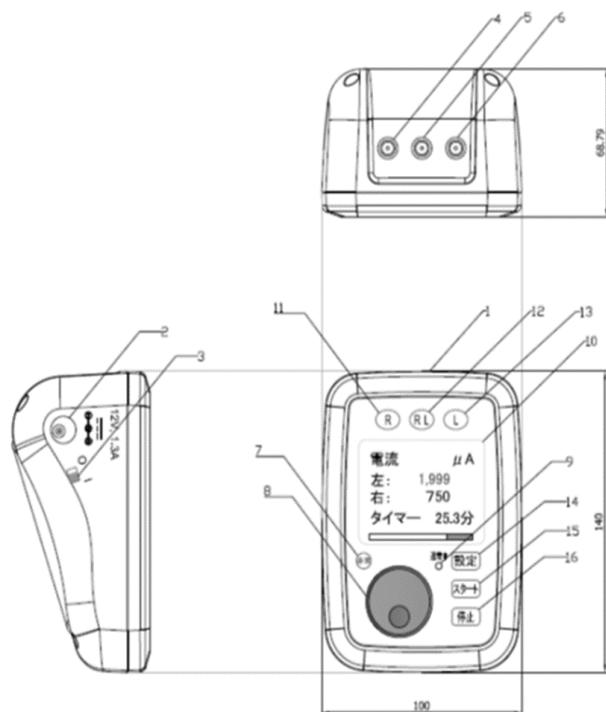

1. 本体
2. AC アダプタジャック
3. 電源スイッチ
4. 電極コネクタ (R)
5. 電極コネクタ (COM)
6. 電極コネクタ (L)
7. 非常停止ボタン
8. ダイヤル
9. 通電中ランプ
10. 液晶ディスプレイ
11. ボタンスイッチ (R)
12. ボタンスイッチ (RL)
13. ボタンスイッチ (L)
14. ボタンスイッチ (設定)
15. ボタンスイッチ (スタート)
16. ボタンスイッチ (ポーズ)

図 3 各部の名称

### 7.3. 設定

本治療ではデフォルト設定（納入時の設定）を変更しないが、参考までにデフォルトを変更する場合の操作を記載する。

- 1) デフォルト設定（納入時の設定）：電流上昇時間 20 秒、断線検知有効、治療時間 30 分、治療電流 1000  $\mu\text{A}$  に設定されている。
  - 網膜色素変性では両目が治療眼となるため、両眼（RL）を選択し、ボタン RL（12）を押す。
  - 片眼が治療眼の場合は、治療眼のボタン R（11）、L（13）のいずれかを選択する。
- 2) 電源投入後、非常停止ボタン（7）を押す。
- 3) 「電流上昇時間 10 / 20 / 30 秒」と表示され「20 秒」が太字で選択されている。変更したい場合は、ダイヤル（ジョグスイッチ、8）で秒数を選択し「設定」（14）を押す。
- 4) 非常停止ボタン（7）をもう一回押すと、「断線検知」設定が可能になる。「有効」が選択されている。変更したい場合は、ダイヤル（8）で「有効」又は「無効」を選択し「設定」（14）を押す。
- 5) 治療時間は 30 分で設定されている。変更したい場合は、初期画面で「停止」（16）を押すと「治療時間 30 分」の表示が出る。ダイヤル（8）で最大 720 分までの時間を選択できる。新しく設定した時間は 1 回のみ有効で、次には 30 分に戻る。電源を再投入してもデフォルト設定に戻る。

### 7.4. 経皮膚電気刺激の施行

初診：治療電流を 1000  $\mu\text{A}$ （1 mA）又は任意の電流に設定する場合

- 1) 電源スイッチ（3）を ON にして装置の電源を入れる。本体の液晶ディスプレイ（10）に「右 1000  $\mu\text{A}$ 」（上段）と「左 1000  $\mu\text{A}$ 」（下段）が表示される。
- 2) 最上段の「R」（右眼、11）、「RL」（両眼、12）、「L」（左眼、13）の中から治療する眼を選択する（網膜色素変性を対象とした本治療では両眼が治療眼であるため「RL」（12）を選択する）。「設定」（14）を押すと、カーソル（右 1000  $\mu\text{A}$  表示左側のピンク色バー）が「右」から「左」に移り（下に移動）、更にもう 1 回「設定」（14）を押し、「TEST」の下にカーソルを移動させる。
- 3) ダイヤル（ジョグスイッチ、8）を右に回すと「TEST」が点灯する。「スタート」（15）を押すと画面に「ジョグスイッチを操作して知覚電流を確認して下さい。」と表示され、「通電中」の赤ランプ（9）が点滅する。
- 4) 知覚電流は全て「0」と表示され、カーソルは「右」（右眼）にある。ダイヤル（8）をゆっくり右に回すと右眼の電流値が上昇し、実電流が表示される。
- 5) 治療電流（本治療では 1000  $\mu\text{A}$ ）を決めたら「設定」（14）を押しカーソルを「左」（左眼）に移動させる。決めた治療電流は知覚電流横に表示される。
- 6) 同様に左眼もダイヤル（8）をゆっくり右に回すと左眼の電流値が上昇し、実電流が表示される。
- 7) 治療電流を決めたら「スタート」（15）を押して治療開始。「そのままお待ちください。コードの状態を確認しています。」と表示される。コードが断線していないか、電極が外れていないかが自動で確認される。確認が終わり、電流（値）が設定値まで達すると、ディスプレイのタイマーカウントダウンが始まる。通電中は「通電中」ランプ（9）が点滅し、ディスプレイには $\infty$ マーク（ディスプレイ最上段の中央）が動き、電気が流れていることを示す。ディスプレイ下段には、タイマーの残り時

間を示す棒グラフも同時表示される。

- 8) 設定時間（通常 30 分）が終了すると自動的に電流は停止し治療は終了する。

#### 再診（2回目以降の治療）

- 1) 電流設定作業はせずに、すぐ治療モードに入ることができる。本試験では 1000  $\mu$ A（1 mA）で 30 分の通電を行う。
- 2) 最上段の「R」（右眼、11）、「RL」（両眼、12）、「L」（左眼、13）の中から治療する眼を選択する（網膜色素変性を対象とした本治療では両眼が治療眼であるため「RL」（12）を選択する）。
- 3) 「スタート」（15）を押せば「そのままお待ちください。コードの状態を確認しています。」と表示され、治療モードに入る。確認が終わり、電流（値）が設定値まで達すると、ディスプレイ（10）のタイマーカウントダウンが始まる。後は初診と同じで、設定時間（通常 30 分）が終了すると自動的に電流は停止し治療は終了する。

#### 断線検出時

- 1) 治療中に電極が外れてしまった場合や、コードが断線した場合には「断線検出」され、通電は自動的に停止する。例えば、通電中に左眼用電極が外れてしまった場合、「左 断線 電極貼付け後 再スタート」という表示が出る。この表示通り、外れた電極を正しい位置に戻す。
- 2) 再度「スタート」ボタン（15）を押すと、「そのままお待ちください。コードの状態を確認しています。」と表示され、電流が再度流れ、タイマーはリセットされることなく、継続して残り時間が表示される。

#### 盲検性確保のための対応

- 1) アンブラインド医師は施行の実施をカルテ等に記録する（盲検性に係る情報は記載しない）。
- 2) アンブラインド医師は、被験者から何らかの症状の訴えがあったとしてもカルテには記載しない。

#### 7.5. 治療の一時中断/再開

- 1) 治療を一時中断する場合は、「停止」（ポーズボタン、16）を押す。「通電中」ランプ（9）が消灯し、タイマーもその時点でカウントが停止する。
- 2) 再開する場合はスタートボタン（15）または停止ボタン（16）を押して、電流（値）が設定値まで達すると、タイマーカウントダウンが再開前の時間から始まる。

#### 7.6. 非常停止

- 1) 何らかの理由で、治療を中断したい場合は、「非常停止」ボタン（7）を押すと直ちに電気刺激は終了し通電中ランプ（9）が消灯し、「非常停止しました」と表示されるランプ（8）が点灯する。解除は「設定」ボタン（14）を押す。

## 8. 不具合及び不測の事態への対応

- 1) 供給時・管理保管中の治験機器に不具合、紛失及び破損等の不測の事態が起こった場合は、治験責任医師又は治験機器管理者は「不具合等報告書（不具合・返却・紛失・廃棄） 兼 回収書（様式3）」を作成し、治験機器提供者及び治験調整医師（代表）に報告する。
- 2) 治療準備中及び治療中の治験機器に不具合、紛失及び破損等の不測の事態が起こった場合は、アンブラインドスタッフは「不具合等報告書（不具合・返却・紛失・廃棄） 兼 回収書（様式3）」を作成し、治験機器提供者に報告するとともに、治験責任医師及び治験調整医師（代表）に不具合及び不測の事態が発生した旨のみを報告し、原本はアンブラインドスタッフのCRCがキーオープン時まで適切に保管し、その後治験責任医師に移管する。
- 3) ブラインド医師が被験者の安全性を評価する際、盲検性に係る情報が無いと適切な対応が出来ない場合にはキーオープン手続きをとる。
- 4) 「不具合等報告書（不具合・返却・紛失・廃棄） 兼 回収書（様式3）」作成時に疑義がある場合にはアンブラインドCRAに内容確認を依頼する。実施医療機関のアンブラインドスタッフより依頼があった場合にアンブラインドCRAは不具合等報告書（様式3）を確認する。
- 5) 治験機器の不具合の場合は、治験責任医師、治験分担医師、治験機器管理者もしくはアンブラインドスタッフは治験機器提供者に迅速な修理を依頼し、措置報告書（修理報告書、様式は規定しない）を入手する。盲検性の維持に係る事項に関してはキーオープンまでアンブラインドスタッフが措置報告書を保管し、治験責任医師には修理完了等のみを報告を行う。キーオープン後治験責任医師に措置報告書に移管する。治験責任医師、治験分担医師もしくは治験機器管理者は、治験調整委員会に治験機器の不具合への対応を報告すると共に適切に保管する。
- 6) 紛失、破損等の不測の事態の場合は、治験分担医師、治験責任医師及び治験調整委員会は、再発防止策を検討し、講じた措置内容及び実施時期を記録し適切に保管（様式は規定しない）する。必要に応じ、治験機器提供者に措置報告書を提出する。

## 9. 治験機器の保管場所への返還

- 1) アンブラインドスタッフは、経皮膚電気刺激施行後に治験機器を保管庫に返還し必要事項を記載した後、治験機器管理者あるいは治験機器管理補助者に連絡する。返還は、原則治験機器使用後の同日に行う。

## 10. 治験期間中の治験機器保管

治験機器は、施行日以外は鍵の掛かる部屋もしくは保管庫で施錠して保管する。

治験実施計画書に在宅施術が可能である旨が記載されている場合は、被験者への貸し出しに関する情報（被験者コード番号、貸出日、提供電極パット数、返却日、処分方法及び処分日）を治験機器管理者が治験機器管理表に記載する。

## 11. 保守

1年に1度、治験機器提供者による点検を受け保守点検記録を残す。記録は治験機器管理者が適切に保

管する。

## 12. 治験機器の治験機器提供者への返却

### 12.1. 不具合及び不測の事態発生時の治験機器提供者への返却

#### 12.1.1. 使用前準備から保管庫への返還までに生じた盲検性維持に関する配慮が必要な不具合の場合

- 1) 使用前準備から保管庫への返還までに生じた不具合やその他問題については、アンブラインドスタッフが盲検性を維持しながら「不具合等報告書（不具合・返却・紛失・廃棄）兼 回収書（様式3）」を作成し治験責任医師に報告する。治験責任医師は「不具合等報告書（不具合・返却・紛失・廃棄）兼 回収書（様式3）」を確認後、当該治験機器を治験機器提供者に返却する。
- 2) 治験責任医師及び治験調整委員会は、治験機器提供者により作成された不具合の原因に関する報告書を受領しアンブラインドスタッフによる確認後、キーオープンまで盲検性を維持し適切に保管する。

#### 12.1.2. 盲検性維持に係る配慮が不要な際の不具合等

- 1) 治験責任医師は、「不具合等報告書（不具合・返却・紛失・廃棄）兼 回収書（様式3）」を作成し、当該治験機器を治験機器提供者に返却する。
- 2) 治験責任医師及び治験調整委員会は、治験機器提供者により作成された不具合の原因に関する報告書を受領し適切に保管する。

### 12.2. 未使用治験機器の取扱い

- 1) 治験機器管理者は、未使用治験機器を、治験機器提供者に返却するまでの期間、他の治験機器と区分して保管し、廃棄・処分は行わない。
- 2) 治験機器管理者は、未使用治験機器を紛失、廃棄・処分した場合、その数量・理由等を「不具合等報告書（不具合・返却・紛失・廃棄）兼 回収書（様式3）」に記載し、治験機器提供者及び治験調整医師（代表）に報告し、原本を適切に保管する。

### 12.3. 使用済治験機器の取扱い

- 1) 治験機器管理者は、被験者に使用するために内包を破いた治験機器（以下、「使用済治験機器」という）を適切に廃棄・処分あるいは治験機器提供者に返却する。使用済治験機器の取り扱いについては、事前に治験調整委員会と治験機器提供者の間で取り決め文書化する。
- 2) 治験調整委員会は、使用済治験機器の取り決め文書を実施医療機関の治験責任医師に送付する。
- 3) 治験機器管理者は、使用済治験機器を治験機器提供者に返送する場合に備え、外箱及び内包を治験終了時まで適切に保管する。

### 12.4. 未使用治験機器及び使用済治験機器の返却

- 1) 治験終了後、治験機器管理者は、未使用治験機器及び使用済治験機器の数量と「治験機器管理表」に記載の数量との整合性を確認する。

- 2) 治験機器管理者は、治験機器の数量に矛盾が生じた場合は、その理由について確認し、「治験機器管理表」に記録する。
- 3) 治験責任医師は、治験機器の返却にあたり「治験機器返却書 兼 受領書（様式5）」を作成する。
- 4) 治験責任医師は、「治験機器返却書 兼 受領書（様式5）」、「治験機器管理表」（写）、未使用治験機器及び使用済治験機器の外箱及び内包を治験機器提供者に返却する。その際、治験機器の外箱及び内包、「治験機器管理表」（写）等に被験者氏名及びカルテ番号等、治験機器提供者が容易に被験者を特定できるような情報が記載されている場合は、マスキング等で判読不能となるようにする。
- 5) 治験責任医師は、治験機器提供者から送付される「治験機器返却書 兼 受領書（様式5）」を受領し、適切に保管する。

### 13. 治験に関係する医師等に対するガイダンス

#### 13.1. 禁忌

心臓ペースメーカーなどの心臓疾患患者や妊娠時等の使用禁止。

#### 13.2. 警告

- 3) 電極は単回使用で、複数回の使用は接着力が低下し痛みを伴う恐れがある。
- 4) 電極の接続プラグは電極接続端子以外に接続しないこと。感電の恐れがある。
- 5) 片眼当たり1日1回30分を超える治療はしないこと。皮膚等の炎症の恐れがある。

#### 13.3. 注意

##### 一般的な注意

- 1) 電極の接触面が減ると単位面積当たりの電流が増えて痛みを感じる。貼り付け面全体が皮膚に当たるよう装着すること、装着後に外れる箇所が出る場合には被験者自身の手で軽く押さえつけると改善できる。
- 2) 本装置の接続端子には、定められたもの以外は接続しないこと。それ以外のものを接続すると感電や故障の原因になる。
- 3) 本装置は眼科専用の治験機器（治療機器）である。眼科以外の用途には使用しないこと。
- 4) 本装置を水や薬品などで濡らさないこと。感電や故障の原因になる。
- 5) 本装置の上に水や薬品等を置かないこと。それらが本装置内に入ると、感電や故障の原因になる。

##### 準備上の注意

電極を被験者に貼りつける際に、皮膚との接着が不十分な場合はテープ等を使い、貼り付け面全体が皮膚に接触するようにすること。

### 14. 資料等の保管

治験責任医師及び治験調整委員会は、別途定める「記録の保存に関する手順書」に従い、本手順書に規定された手順に係る様式及び関連資料を保管する。

1  
2  
3  
4  
5  
6  
7  
8  
9  
10  
11  
12  
13  
14  
15  
16  
17  
18  
19  
20  
21  
22  
23  
24  
25  
26  
27  
28  
29  
30  
31  
32  
33  
34  
35  
36  
37  
38  
39  
40  
41  
42  
43  
44  
45  
46  
47  
48  
49  
50  
51  
52  
53  
54  
55  
56  
57  
58  
59  
60

治験機器の提供及び管理に関する手順書 3.0 版  
作成年月日：2021年9月10日

## 15. 改訂履歴

| 版番号   | 改訂日        | 改訂理由／内容                |
|-------|------------|------------------------|
| 1.0 版 | 2021年3月18日 | 新規作成                   |
| 2.0 版 | 2021年5月25日 | 盲検・非盲検スタッフの業務手順の明確化のため |
| 2.1 版 | 2021年7月1日  | 記載整備                   |
| 3.0 版 | 2021年9月10日 | 盲検性確保手順の明確化のため         |

For peer review only



様式 1

20 年 月 日

## 治験機器提供依頼書

治験機器提供者

有限会社メイヨー 殿

治験調整医師（代表）

千葉大学医学部附属病院 山本 修一 殿

〇〇病院 〇〇科

治験責任医師：\_\_\_\_\_ 印

治験機器（経皮膚電気刺激装置）について、下記のとおり供給願います。

記

治験課題名：網膜色素変性を対象とした経皮膚電気刺激装置の有効性及び安全性を検証する  
 シャム対照二重遮蔽比較試験

|                                                     |                                   |   |
|-----------------------------------------------------|-----------------------------------|---|
| <input type="checkbox"/> 治験機器一式（本体、電極リード線、AC アダプター） |                                   | 式 |
| <input type="checkbox"/> 治験機器構成機材のみの<br>供給依頼        | <input type="checkbox"/> 本体       | 台 |
|                                                     | <input type="checkbox"/> 電極リード線   | 組 |
|                                                     | <input type="checkbox"/> AC アダプター | 台 |
| 電極パット（1 組 3 枚）                                      |                                   | 組 |
| 納入希望日時                                              | 20 年 月 日<br>時～ 時                  |   |

以上

原本：治験責任医師保管、

写：治験機器提供者（有限会社メイヨー）、治験調整医師

治験機器の提供及び管理に関する手順書 3.0 版  
作成年月日：2021年9月10日

様式2

20 年 月 日

## 治験機器納入書 兼 受領書

治験責任医師

〇〇病院 〇〇科 〇〇 〇〇殿

治験調整医師（代表）

千葉大学医学部附属病院 山本 修一 殿

治験機器提供者

有限会社メイヨー 印

治験機器（経皮膚電気刺激装置）について、下記のとおり納入致します。

記

治験課題名：網膜色素変性を対象とした経皮膚電気刺激装置の有効性及び安全性を検証する  
シャム対照二重遮蔽比較試験

|                                                              |                                                                                                                |
|--------------------------------------------------------------|----------------------------------------------------------------------------------------------------------------|
| <input type="checkbox"/> 治験機器一式（本体、電極リード線、ACアダプター）           | 式                                                                                                              |
| <input type="checkbox"/> 治験機器構成機材のみの納入                       | <input type="checkbox"/> 本体 台                                                                                  |
|                                                              | <input type="checkbox"/> 電極リード線 組                                                                              |
|                                                              | <input type="checkbox"/> ACアダプター 台                                                                             |
| 電極パット（1組3枚）                                                  | 組                                                                                                              |
| 添付書類： <input type="checkbox"/> 有、 <input type="checkbox"/> 無 | <input type="checkbox"/> 製造に関する記録<br><input type="checkbox"/> 品質に関する試験の記録<br><input type="checkbox"/> 校正に関する記録 |
| 納入希望日時                                                       | 20 年 月 日<br>時～ 時                                                                                               |

以上

治験機器提供者 殿

治験機器機材について、上記のと通りの受領を確認致しました。

治験責任医師（記名押印又は署名）

確認日：20 年 月 日

原本：治験責任医師保管

写：治験機器提供者（有限会社メイヨー）、治験調整医師

治験機器の提供及び管理に関する手順書 3.0 版  
作成年月日：2021年9月10日

様式 3

20 年 月 日

## 不具合等報告書（不具合・返却・紛失・廃棄） 兼 回収書

治験機器提供者 有限会社メイヨー 殿

治験調整医師（代表） 千葉大学医学部附属病院 山本 修一 殿

〇〇病院 〇〇科

治験責任医師・アンブラインドスタッフ：\_\_\_\_\_ 印

治験機器の不具合・返却・紛失・廃棄について、下記のとおり報告致します。

記

治験課題名：網膜色素変性を対象とした経皮膚電気刺激装置の有効性及び安全性を検証する  
シャム対照二重遮蔽比較試験

|             |   |                                                                                                          |
|-------------|---|----------------------------------------------------------------------------------------------------------|
| 本体製造番号      |   | <input type="checkbox"/> 未使用、 <input type="checkbox"/> 使用済（治験使用）<br><input type="checkbox"/> 使用済（不具合による） |
| 本体製造番号      |   | <input type="checkbox"/> 未使用、 <input type="checkbox"/> 使用済（治験使用）<br><input type="checkbox"/> 使用済（不具合による） |
| 電極パット(1組3枚) |   | 組                                                                                                        |
| ACアダプター     | 台 | 電極リード線 組                                                                                                 |

不具合・返却・紛失・廃棄（外箱、内包を含む）の理由

以上

-----  
治験責任医師／アンブラインドスタッフ 殿

治験機器に関する上記内容を確認・回収致しました。

確認者（記名押印又は署名）

確認日：20 年 月 日 \_\_\_\_\_

原本：治験機器提供者（有限会社メイヨー）保管

写：治験責任医師、治験調整事務局

治験機器の提供及び管理に関する手順書 3.0 版  
作成年月日：2021 年 9 月 10 日

様式 4

20 年 月 日

## 治験機器定期点検依頼書 兼 受領書

治験機器提供者

有限会社メイヨー 殿

写) 治験調整事務局

〇〇病院 〇〇科

治験責任医師：\_\_\_\_\_ 印

下記治験機器（経皮膚電気刺激装置）について、定期点検を依頼致します。

記

治験課題名：網膜色素変性を対象とした経皮膚電気刺激装置の有効性及び安全性を検証する  
シヤム対照二重遮蔽比較試験

|           |      |
|-----------|------|
| 本体数（製造番号） | 台（ ） |
|-----------|------|

送付先：〒492-8213 愛知県稲沢市高御堂二丁目 25 番 22 号

有限会社メイヨー 吉川 眞男 Tel：0587-33-0120

返送先：\_\_\_\_\_

以上

治験責任医師 殿

定期点検対象の上記治験機器を受領致しました。

有限会社メイヨー（記名押印又は署名）

受領日：20 年 月 日 \_\_\_\_\_

原本：治験機器提供者（有限会社メイヨー）保管

写：治験責任医師、治験調整事務局

治験機器管理表（本体）

様式 5

2020年 月 日

## 治験機器返却書 兼 受領書

治験責任医師

〇〇病院 〇〇科

〇〇 〇〇殿

写) 治験調整事務局

治験機器提供者

有限会社メイヨー 印

下記治験機器（経皮膚電気刺激装置）について、点検を終了し返却致します。

記

治験課題名：網膜色素変性を対象とした経皮膚電気刺激装置の有効性及び安全性を検証する  
 シャム対照二重遮蔽比較試験

|           |                 |
|-----------|-----------------|
| 本体数（製造番号） | 台（ ）            |
| 添付資料      | 治験機器の校正結果報告書 1部 |

以上

治験機器提供者 殿

上記治験機器（経皮膚電気刺激装置）の点検後の返却を確認致しました。

治験責任医師（記名押印又は署名）

受領日：20 年 月 日





# Reporting checklist for protocol of a clinical trial.

Based on the SPIRIT guidelines.

## Instructions to authors

Complete this checklist by entering the page numbers from your manuscript where readers will find each of the items listed below.

Your article may not currently address all the items on the checklist. Please modify your text to include the missing information. If you are certain that an item does not apply, please write "n/a" and provide a short explanation.

Upload your completed checklist as an extra file when you submit to a journal.

In your methods section, say that you used the SPIRIT reporting guidelines, and cite them as:

Chan A-W, Tetzlaff JM, Gøtzsche PC, Altman DG, Mann H, Berlin J, Dickersin K, Hróbjartsson A, Schulz KF, Parulekar WR, Krleža-Jerić K, Laupacis A, Moher D. SPIRIT 2013 Explanation and Elaboration: Guidance for protocols of clinical trials. *BMJ*. 2013;346:e7586

|                                             |                     | Reporting Item                                                                                               | Page Number |
|---------------------------------------------|---------------------|--------------------------------------------------------------------------------------------------------------|-------------|
| <b>Administrative information</b>           |                     |                                                                                                              |             |
| Title                                       | <a href="#">#1</a>  | Descriptive title identifying the study design, population, interventions, and, if applicable, trial acronym | 1           |
| Trial registration                          | <a href="#">#2a</a> | Trial identifier and registry name. If not yet registered, name of intended registry                         | 3           |
| Trial registration: data set                | <a href="#">#2b</a> | All items from the World Health Organization Trial Registration Data Set                                     | 13          |
| Protocol version                            | <a href="#">#3</a>  | Date and version identifier                                                                                  | 3           |
| Funding                                     | <a href="#">#4</a>  | Sources and types of financial, material, and other support                                                  | 22          |
| Roles and responsibilities: contributorship | <a href="#">#5a</a> | Names, affiliations, and roles of protocol contributors                                                      | 22          |



|    |                           |                     |                                                                    |    |
|----|---------------------------|---------------------|--------------------------------------------------------------------|----|
| 1  | Roles and                 | <a href="#">#5b</a> | Name and contact information for the trial sponsor                 | 22 |
| 2  | responsibilities:         |                     |                                                                    |    |
| 3  | sponsor contact           |                     |                                                                    |    |
| 4  | information               |                     |                                                                    |    |
| 5  |                           |                     |                                                                    |    |
| 6  |                           |                     |                                                                    |    |
| 7  |                           |                     |                                                                    |    |
| 8  | Roles and                 | <a href="#">#5c</a> | Role of study sponsor and funders, if any, in study design;        | 26 |
| 9  | responsibilities:         |                     | collection, management, analysis, and interpretation of data;      |    |
| 10 | sponsor and funder        |                     | writing of the report; and the decision to submit the report for   |    |
| 11 |                           |                     | publication, including whether they will have ultimate authority   |    |
| 12 |                           |                     | over any of these activities                                       |    |
| 13 |                           |                     |                                                                    |    |
| 14 |                           |                     |                                                                    |    |
| 15 |                           |                     |                                                                    |    |
| 16 | Roles and                 | <a href="#">#5d</a> | Composition, roles, and responsibilities of the coordinating       | 16 |
| 17 | responsibilities:         |                     | centre, steering committee, endpoint adjudication committee,       |    |
| 18 | committees                |                     | data management team, and other individuals or groups              |    |
| 19 |                           |                     | overseeing the trial, if applicable (see Item 21a for data         |    |
| 20 |                           |                     | monitoring committee)                                              |    |
| 21 |                           |                     |                                                                    |    |
| 22 |                           |                     |                                                                    |    |
| 23 |                           |                     |                                                                    |    |
| 24 | <b>Introduction</b>       |                     |                                                                    |    |
| 25 |                           |                     |                                                                    |    |
| 26 |                           |                     |                                                                    |    |
| 27 | Background and            | <a href="#">#6a</a> | Description of research question and justification for undertaking | 5  |
| 28 | rationale                 |                     | the trial, including summary of relevant studies (published and    |    |
| 29 |                           |                     | unpublished) examining benefits and harms for each intervention    |    |
| 30 |                           |                     |                                                                    |    |
| 31 |                           |                     |                                                                    |    |
| 32 | Background and            | <a href="#">#6b</a> | Explanation for choice of comparators                              | 5  |
| 33 | rationale: choice of      |                     |                                                                    |    |
| 34 | comparators               |                     |                                                                    |    |
| 35 |                           |                     |                                                                    |    |
| 36 |                           |                     |                                                                    |    |
| 37 | Objectives                | <a href="#">#7</a>  | Specific objectives or hypotheses                                  | 6  |
| 38 |                           |                     |                                                                    |    |
| 39 |                           |                     |                                                                    |    |
| 40 | Trial design              | <a href="#">#8</a>  | Description of trial design including type of trial (eg, parallel  | 6  |
| 41 |                           |                     | group, crossover, factorial, single group), allocation ratio, and  |    |
| 42 |                           |                     | framework (eg, superiority, equivalence, non-inferiority,          |    |
| 43 |                           |                     | exploratory)                                                       |    |
| 44 |                           |                     |                                                                    |    |
| 45 |                           |                     |                                                                    |    |
| 46 | <b>Methods:</b>           |                     |                                                                    |    |
| 47 | <b>Participants,</b>      |                     |                                                                    |    |
| 48 | <b>interventions, and</b> |                     |                                                                    |    |
| 49 | <b>outcomes</b>           |                     |                                                                    |    |
| 50 |                           |                     |                                                                    |    |
| 51 |                           |                     |                                                                    |    |
| 52 |                           |                     |                                                                    |    |
| 53 | Study setting             | <a href="#">#9</a>  | Description of study settings (eg, community clinic, academic      | 6  |
| 54 |                           |                     | hospital) and list of countries where data will be collected.      |    |
| 55 |                           |                     | Reference to where list of study sites can be obtained             |    |
| 56 |                           |                     |                                                                    |    |
| 57 |                           |                     |                                                                    |    |
| 58 |                           |                     |                                                                    |    |
| 59 |                           |                     |                                                                    |    |
| 60 |                           |                     |                                                                    |    |

|    |                              |                      |                                                                                                                                                                                                                                                                                                                                                                                |    |
|----|------------------------------|----------------------|--------------------------------------------------------------------------------------------------------------------------------------------------------------------------------------------------------------------------------------------------------------------------------------------------------------------------------------------------------------------------------|----|
| 1  | Eligibility criteria         | <a href="#">#10</a>  | Inclusion and exclusion criteria for participants. If applicable, eligibility criteria for study centres and individuals who will perform the interventions (eg, surgeons, psychotherapists)                                                                                                                                                                                   | 10 |
| 2  |                              |                      |                                                                                                                                                                                                                                                                                                                                                                                |    |
| 3  |                              |                      |                                                                                                                                                                                                                                                                                                                                                                                |    |
| 4  |                              |                      |                                                                                                                                                                                                                                                                                                                                                                                |    |
| 5  |                              |                      |                                                                                                                                                                                                                                                                                                                                                                                |    |
| 6  | Interventions:               | <a href="#">#11a</a> | Interventions for each group with sufficient detail to allow replication, including how and when they will be administered                                                                                                                                                                                                                                                     | 13 |
| 7  | description                  |                      |                                                                                                                                                                                                                                                                                                                                                                                |    |
| 8  |                              |                      |                                                                                                                                                                                                                                                                                                                                                                                |    |
| 9  |                              |                      |                                                                                                                                                                                                                                                                                                                                                                                |    |
| 10 | Interventions:               | <a href="#">#11b</a> | Criteria for discontinuing or modifying allocated interventions for a given trial participant (eg, drug dose change in response to harms, participant request, or improving / worsening disease)                                                                                                                                                                               | 15 |
| 11 | modifications                |                      |                                                                                                                                                                                                                                                                                                                                                                                |    |
| 12 |                              |                      |                                                                                                                                                                                                                                                                                                                                                                                |    |
| 13 |                              |                      |                                                                                                                                                                                                                                                                                                                                                                                |    |
| 14 |                              |                      |                                                                                                                                                                                                                                                                                                                                                                                |    |
| 15 | Interventions:               | <a href="#">#11c</a> | Strategies to improve adherence to intervention protocols, and any procedures for monitoring adherence (eg, drug tablet return; laboratory tests)                                                                                                                                                                                                                              | 15 |
| 16 | adherence                    |                      |                                                                                                                                                                                                                                                                                                                                                                                |    |
| 17 |                              |                      |                                                                                                                                                                                                                                                                                                                                                                                |    |
| 18 |                              |                      |                                                                                                                                                                                                                                                                                                                                                                                |    |
| 19 |                              |                      |                                                                                                                                                                                                                                                                                                                                                                                |    |
| 20 | Interventions:               | <a href="#">#11d</a> | Relevant concomitant care and interventions that are permitted or prohibited during the trial                                                                                                                                                                                                                                                                                  | 12 |
| 21 | concomitant care             |                      |                                                                                                                                                                                                                                                                                                                                                                                |    |
| 22 |                              |                      |                                                                                                                                                                                                                                                                                                                                                                                |    |
| 23 |                              |                      |                                                                                                                                                                                                                                                                                                                                                                                |    |
| 24 | Outcomes                     | <a href="#">#12</a>  | Primary, secondary, and other outcomes, including the specific measurement variable (eg, systolic blood pressure), analysis metric (eg, change from baseline, final value, time to event), method of aggregation (eg, median, proportion), and time point for each outcome. Explanation of the clinical relevance of chosen efficacy and harm outcomes is strongly recommended | 9  |
| 25 |                              |                      |                                                                                                                                                                                                                                                                                                                                                                                |    |
| 26 |                              |                      |                                                                                                                                                                                                                                                                                                                                                                                |    |
| 27 |                              |                      |                                                                                                                                                                                                                                                                                                                                                                                |    |
| 28 |                              |                      |                                                                                                                                                                                                                                                                                                                                                                                |    |
| 29 |                              |                      |                                                                                                                                                                                                                                                                                                                                                                                |    |
| 30 |                              |                      |                                                                                                                                                                                                                                                                                                                                                                                |    |
| 31 |                              |                      |                                                                                                                                                                                                                                                                                                                                                                                |    |
| 32 |                              |                      |                                                                                                                                                                                                                                                                                                                                                                                |    |
| 33 |                              |                      |                                                                                                                                                                                                                                                                                                                                                                                |    |
| 34 | Participant timeline         | <a href="#">#13</a>  | Time schedule of enrolment, interventions (including any run-ins and washouts), assessments, and visits for participants. A schematic diagram is highly recommended (see Figure)                                                                                                                                                                                               | 8  |
| 35 |                              |                      |                                                                                                                                                                                                                                                                                                                                                                                |    |
| 36 |                              |                      |                                                                                                                                                                                                                                                                                                                                                                                |    |
| 37 |                              |                      |                                                                                                                                                                                                                                                                                                                                                                                |    |
| 38 |                              |                      |                                                                                                                                                                                                                                                                                                                                                                                |    |
| 39 |                              |                      |                                                                                                                                                                                                                                                                                                                                                                                |    |
| 40 | Sample size                  | <a href="#">#14</a>  | Estimated number of participants needed to achieve study objectives and how it was determined, including clinical and statistical assumptions supporting any sample size calculations                                                                                                                                                                                          | 18 |
| 41 |                              |                      |                                                                                                                                                                                                                                                                                                                                                                                |    |
| 42 |                              |                      |                                                                                                                                                                                                                                                                                                                                                                                |    |
| 43 |                              |                      |                                                                                                                                                                                                                                                                                                                                                                                |    |
| 44 |                              |                      |                                                                                                                                                                                                                                                                                                                                                                                |    |
| 45 | Recruitment                  | <a href="#">#15</a>  | Strategies for achieving adequate participant enrolment to reach target sample size                                                                                                                                                                                                                                                                                            | 20 |
| 46 |                              |                      |                                                                                                                                                                                                                                                                                                                                                                                |    |
| 47 |                              |                      |                                                                                                                                                                                                                                                                                                                                                                                |    |
| 48 |                              |                      |                                                                                                                                                                                                                                                                                                                                                                                |    |
| 49 | <b>Methods: Assignment</b>   |                      |                                                                                                                                                                                                                                                                                                                                                                                |    |
| 50 | <b>of interventions (for</b> |                      |                                                                                                                                                                                                                                                                                                                                                                                |    |
| 51 | <b>controlled trials)</b>    |                      |                                                                                                                                                                                                                                                                                                                                                                                |    |
| 52 |                              |                      |                                                                                                                                                                                                                                                                                                                                                                                |    |
| 53 |                              |                      |                                                                                                                                                                                                                                                                                                                                                                                |    |
| 54 | Allocation: sequence         | <a href="#">#16a</a> | Method of generating the allocation sequence (eg, computer-generated random numbers), and list of any factors for stratification. To reduce predictability of a random sequence, details of any planned restriction (eg, blocking) should be                                                                                                                                   | 13 |
| 55 | generation                   |                      |                                                                                                                                                                                                                                                                                                                                                                                |    |
| 56 |                              |                      |                                                                                                                                                                                                                                                                                                                                                                                |    |
| 57 |                              |                      |                                                                                                                                                                                                                                                                                                                                                                                |    |
| 58 |                              |                      |                                                                                                                                                                                                                                                                                                                                                                                |    |
| 59 |                              |                      |                                                                                                                                                                                                                                                                                                                                                                                |    |
| 60 |                              |                      |                                                                                                                                                                                                                                                                                                                                                                                |    |

provided in a separate document that is unavailable to those who enrol participants or assign interventions

|                                                           |                      |                                                                                                                                                                                                                                                                                                                                                                                                              |    |
|-----------------------------------------------------------|----------------------|--------------------------------------------------------------------------------------------------------------------------------------------------------------------------------------------------------------------------------------------------------------------------------------------------------------------------------------------------------------------------------------------------------------|----|
| Allocation concealment mechanism                          | <a href="#">#16b</a> | Mechanism of implementing the allocation sequence (eg, central telephone; sequentially numbered, opaque, sealed envelopes), describing any steps to conceal the sequence until interventions are assigned                                                                                                                                                                                                    | 14 |
| Allocation: implementation                                | <a href="#">#16c</a> | Who will generate the allocation sequence, who will enrol participants, and who will assign participants to interventions                                                                                                                                                                                                                                                                                    | 13 |
| Blinding (masking)                                        | <a href="#">#17a</a> | Who will be blinded after assignment to interventions (eg, trial participants, care providers, outcome assessors, data analysts), and how                                                                                                                                                                                                                                                                    | 14 |
| Blinding (masking): emergency unblinding                  | <a href="#">#17b</a> | If blinded, circumstances under which unblinding is permissible, and procedure for revealing a participant's allocated intervention during the trial                                                                                                                                                                                                                                                         | 16 |
| <b>Methods: Data collection, management, and analysis</b> |                      |                                                                                                                                                                                                                                                                                                                                                                                                              |    |
| Data collection plan                                      | <a href="#">#18a</a> | Plans for assessment and collection of outcome, baseline, and other trial data, including any related processes to promote data quality (eg, duplicate measurements, training of assessors) and a description of study instruments (eg, questionnaires, laboratory tests) along with their reliability and validity, if known. Reference to where data collection forms can be found, if not in the protocol | 14 |
| Data collection plan: retention                           | <a href="#">#18b</a> | Plans to promote participant retention and complete follow-up, including list of any outcome data to be collected for participants who discontinue or deviate from intervention protocols                                                                                                                                                                                                                    | 14 |
| Data management                                           | <a href="#">#19</a>  | Plans for data entry, coding, security, and storage, including any related processes to promote data quality (eg, double data entry; range checks for data values). Reference to where details of data management procedures can be found, if not in the protocol                                                                                                                                            | 13 |
| Statistics: outcomes                                      | <a href="#">#20a</a> | Statistical methods for analysing primary and secondary outcomes. Reference to where other details of the statistical analysis plan can be found, if not in the protocol                                                                                                                                                                                                                                     | 17 |

|    |                            |                      |                                                                    |    |
|----|----------------------------|----------------------|--------------------------------------------------------------------|----|
| 1  | Statistics: additional     | <a href="#">#20b</a> | Methods for any additional analyses (eg, subgroup and adjusted     | NA |
| 2  | analyses                   |                      | analyses)                                                          |    |
| 3  |                            |                      |                                                                    |    |
| 4  | Statistics: analysis       | <a href="#">#20c</a> | Definition of analysis population relating to protocol non-        | 17 |
| 5  | population and missing     |                      | adherence (eg, as randomised analysis), and any statistical        |    |
| 6  | data                       |                      | methods to handle missing data (eg, multiple imputation)           |    |
| 7  |                            |                      |                                                                    |    |
| 8  |                            |                      |                                                                    |    |
| 9  |                            |                      |                                                                    |    |
| 10 | <b>Methods: Monitoring</b> |                      |                                                                    |    |
| 11 |                            |                      |                                                                    |    |
| 12 | Data monitoring:           | <a href="#">#21a</a> | Composition of data monitoring committee (DMC); summary of         | 16 |
| 13 | formal committee           |                      | its role and reporting structure; statement of whether it is       |    |
| 14 |                            |                      | independent from the sponsor and competing interests; and          |    |
| 15 |                            |                      | reference to where further details about its charter can be found, |    |
| 16 |                            |                      | if not in the protocol. Alternatively, an explanation of why a     |    |
| 17 |                            |                      | DMC is not needed                                                  |    |
| 18 |                            |                      |                                                                    |    |
| 19 |                            |                      |                                                                    |    |
| 20 |                            |                      |                                                                    |    |
| 21 |                            |                      |                                                                    |    |
| 22 | Data monitoring:           | <a href="#">#21b</a> | Description of any interim analyses and stopping guidelines,       | 19 |
| 23 | interim analysis           |                      | including who will have access to these interim results and make   |    |
| 24 |                            |                      | the final decision to terminate the trial                          |    |
| 25 |                            |                      |                                                                    |    |
| 26 |                            |                      |                                                                    |    |
| 27 | Harms                      | <a href="#">#22</a>  | Plans for collecting, assessing, reporting, and managing solicited | 15 |
| 28 |                            |                      | and spontaneously reported adverse events and other unintended     |    |
| 29 |                            |                      | effects of trial interventions or trial conduct                    |    |
| 30 |                            |                      |                                                                    |    |
| 31 |                            |                      |                                                                    |    |
| 32 |                            |                      |                                                                    |    |
| 33 | Auditing                   | <a href="#">#23</a>  | Frequency and procedures for auditing trial conduct, if any, and   | 15 |
| 34 |                            |                      | whether the process will be independent from investigators and     |    |
| 35 |                            |                      | the sponsor                                                        |    |
| 36 |                            |                      |                                                                    |    |
| 37 |                            |                      |                                                                    |    |
| 38 | <b>Ethics and</b>          |                      |                                                                    |    |
| 39 | <b>dissemination</b>       |                      |                                                                    |    |
| 40 |                            |                      |                                                                    |    |
| 41 |                            |                      |                                                                    |    |
| 42 | Research ethics            | <a href="#">#24</a>  | Plans for seeking research ethics committee / institutional review | 3  |
| 43 | approval                   |                      | board (REC / IRB) approval                                         |    |
| 44 |                            |                      |                                                                    |    |
| 45 |                            |                      |                                                                    |    |
| 46 | Protocol amendments        | <a href="#">#25</a>  | Plans for communicating important protocol modifications (eg,      | 10 |
| 47 |                            |                      | changes to eligibility criteria, outcomes, analyses) to relevant   |    |
| 48 |                            |                      | parties (eg, investigators, REC / IRBs, trial participants, trial  |    |
| 49 |                            |                      | registries, journals, regulators)                                  |    |
| 50 |                            |                      |                                                                    |    |
| 51 |                            |                      |                                                                    |    |
| 52 |                            |                      |                                                                    |    |
| 53 | Consent or assent          | <a href="#">#26a</a> | Who will obtain informed consent or assent from potential trial    | 24 |
| 54 |                            |                      | participants or authorised surrogates, and how (see Item 32)       |    |
| 55 |                            |                      |                                                                    |    |
| 56 |                            |                      |                                                                    |    |
| 57 |                            |                      |                                                                    |    |
| 58 |                            |                      |                                                                    |    |
| 59 |                            |                      |                                                                    |    |
| 60 |                            |                      |                                                                    |    |

|    |                          |                      |                                                                      |    |
|----|--------------------------|----------------------|----------------------------------------------------------------------|----|
| 1  | Consent or assent:       | <a href="#">#26b</a> | Additional consent provisions for collection and use of              | NA |
| 2  | ancillary studies        |                      | participant data and biological specimens in ancillary studies, if   |    |
| 3  |                          |                      | applicable                                                           |    |
| 4  |                          |                      |                                                                      |    |
| 5  |                          |                      |                                                                      |    |
| 6  | Confidentiality          | <a href="#">#27</a>  | How personal information about potential and enrolled                | 23 |
| 7  |                          |                      | participants will be collected, shared, and maintained in order to   |    |
| 8  |                          |                      | protect confidentiality before, during, and after the trial          |    |
| 9  |                          |                      |                                                                      |    |
| 10 |                          |                      |                                                                      |    |
| 11 | Declaration of interests | <a href="#">#28</a>  | Financial and other competing interests for principal investigators  | 23 |
| 12 |                          |                      | for the overall trial and each study site                            |    |
| 13 |                          |                      |                                                                      |    |
| 14 |                          |                      |                                                                      |    |
| 15 | Data access              | <a href="#">#29</a>  | Statement of who will have access to the final trial dataset, and    | 22 |
| 16 |                          |                      | disclosure of contractual agreements that limit such access for      |    |
| 17 |                          |                      | investigators                                                        |    |
| 18 |                          |                      |                                                                      |    |
| 19 |                          |                      |                                                                      |    |
| 20 | Ancillary and post trial | <a href="#">#30</a>  | Provisions, if any, for ancillary and post-trial care, and for       | 16 |
| 21 | care                     |                      | compensation to those who suffer harm from trial participation       |    |
| 22 |                          |                      |                                                                      |    |
| 23 |                          |                      |                                                                      |    |
| 24 | Dissemination policy:    | <a href="#">#31a</a> | Plans for investigators and sponsor to communicate trial results     | 19 |
| 25 | trial results            |                      | to participants, healthcare professionals, the public, and other     |    |
| 26 |                          |                      | relevant groups (eg, via publication, reporting in results           |    |
| 27 |                          |                      | databases, or other data sharing arrangements), including any        |    |
| 28 |                          |                      | publication restrictions                                             |    |
| 29 |                          |                      |                                                                      |    |
| 30 |                          |                      |                                                                      |    |
| 31 |                          |                      |                                                                      |    |
| 32 |                          |                      |                                                                      |    |
| 33 | Dissemination policy:    | <a href="#">#31b</a> | Authorship eligibility guidelines and any intended use of            | NA |
| 34 | authorship               |                      | professional writers                                                 |    |
| 35 |                          |                      |                                                                      |    |
| 36 |                          |                      |                                                                      |    |
| 37 | Dissemination policy:    | <a href="#">#31c</a> | Plans, if any, for granting public access to the full protocol,      | NA |
| 38 | reproducible research    |                      | participant-level dataset, and statistical code                      |    |
| 39 |                          |                      |                                                                      |    |
| 40 |                          |                      |                                                                      |    |
| 41 | <b>Appendices</b>        |                      |                                                                      |    |
| 42 |                          |                      |                                                                      |    |
| 43 | Informed consent         | <a href="#">#32</a>  | Model consent form and other related documentation given to          | 7  |
| 44 | materials                |                      | participants and authorised surrogates                               |    |
| 45 |                          |                      |                                                                      |    |
| 46 |                          |                      |                                                                      |    |
| 47 | Biological specimens     | <a href="#">#33</a>  | Plans for collection, laboratory evaluation, and storage of          | NA |
| 48 |                          |                      | biological specimens for genetic or molecular analysis in the        |    |
| 49 |                          |                      | current trial and for future use in ancillary studies, if applicable |    |
| 50 |                          |                      |                                                                      |    |
| 51 |                          |                      |                                                                      |    |

None The SPIRIT Explanation and Elaboration paper is distributed under the terms of the Creative Commons Attribution License CC-BY-NC. This checklist can be completed online using <https://www.goodreports.org/>, a tool made by the [EQUATOR Network](#) in collaboration with [Penelope.ai](#)
