# Supplementary material for: Evaluating the efficacy and safety of transdermal electrical stimulation on the visual functions of patients with retinitis pigmentosa: a clinical trial protocol for a prospective, multicentre, randomised, double-masked and sham-controlled design (ePICO trial)
Source: PubMed Central journal article supplement — BMJ Open. 2022 May 6;12(5):e057193. doi: 10.1136/bmjopen-2021-057193 (PMC9083404; doi:10.1136/bmjopen-2021-057193), 2022-05-06
Supplement: bmjopen-2021-057193supp002.pdf [file bmjopen-2021-057193supp002.pdf]

治験実施計画書番号： CCRC1804  
(第 1.0 版)  
作成日：2021 年 4 月 1 日

よくお読みください

患者さんへ

網膜色素変性を対象とした経皮膚電気刺激装置の  
有効性及び安全性を検証するシャム対照二重遮蔽比較試験  
～説明および同意文書～

この冊子には、経皮膚電気刺激装置という医療機器の、効果や安全性を確かめるための臨床試験(治験)についての詳しい説明が書かれています。

この冊子をよくお読みになり、この治験の目的や方法、医療機器について十分にご理解されたうえで、治験に参加されるか否かを決めてください。担当医師の説明やこの説明文書の中で、わからないことや心配なことなどがありましたら、どんなことでも遠慮なくお尋ねください。

治験実施計画書番号： CCRC1804  
(第 1.0 版)  
作成日：2021 年 4 月 1 日

## 目次

|                                      |    |
|--------------------------------------|----|
| 1. 治験とは？.....                        | 3  |
| 2. 網膜色素変性と経皮膚電気刺激装置について.....         | 4  |
| 3. 治験の目的.....                        | 7  |
| 4. この治験の方法.....                      | 7  |
| 5. この治験の参加予定期間.....                  | 17 |
| 6. 予定人数.....                         | 17 |
| 7. 利益と不利益.....                       | 17 |
| 8. 他の治療法.....                        | 19 |
| 9. 治験への参加を中止する場合について.....            | 19 |
| 10. 新たに重要な情報が得られた場合について.....         | 20 |
| 11. 治験に関連した健康被害の治療について.....          | 20 |
| 12. 治験に参加された場合の費用について.....           | 20 |
| 13. カルテなどの医療記録の閲覧と参加者の秘密の保全について..... | 21 |
| 14. 知的財産権と利益相反について.....              | 23 |
| 15. 治験に参加いただくことは自由です.....            | 23 |
| 16. 患者さんに守っていただきたいことについて.....        | 23 |
| 17. 治験を審査する委員会.....                  | 24 |
| 18. 治験に関する相談窓口.....                  | 26 |

治験実施計画書番号： CCRC1804  
 (第 1.0 版)  
 作成日：2021 年 4 月 1 日

## 1. 治験とは？

新しい医薬品・医療機器が世の中に出て、多くの患者さんに使われるためには、国から承認を得ることが必要とされています。そのため、その効果と安全性を何段階にもわたって慎重に調べます。まずは動物実験などによって医療機器の効果と安全性が確認されます。その後、健康な方や患者さんに使っていただき、効果や安全性を詳しく調べます。このように、開発の最終段階において、人を対象に効果や安全性を確かめ、厚生労働省に「医薬品・医療機器」として認めもらうため、申請の資料を集めることを目的とした試験を「治験」、その治験で使われる機器を「治験機器」と呼んでいます。

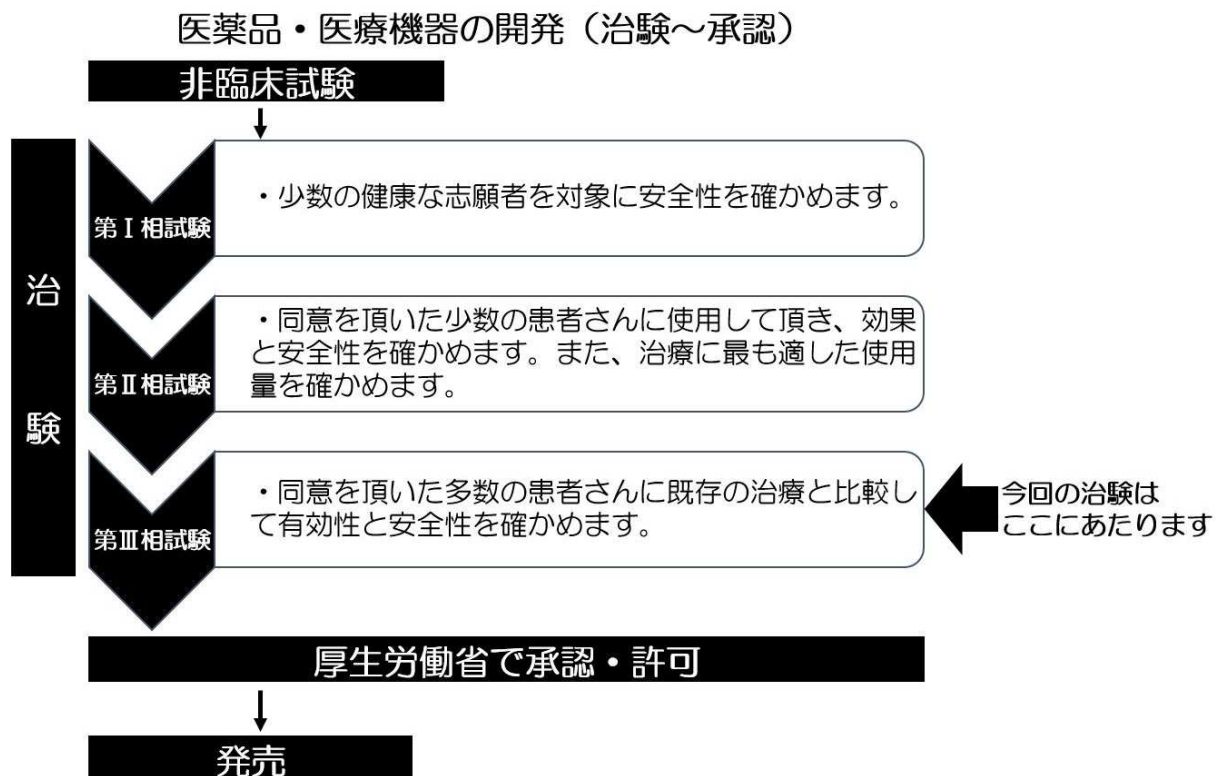

治験実施計画書番号： CCRC1804  
(第 1.0 版)  
作成日：2021 年 4 月 1 日

治験は、一般の治療と異なり、研究的な側面があります。そのため、治験は参加された方の安全や人権を守るために、「医薬品医療機器法」という法律と厚生労働省が定めた「医療機器の臨床試験の実施の基準に関する省令（GCP）」を守りながら行われます。また、当院の治験審査委員会（治験について審査する委員会）で、この治験の内容に問題がないか、患者さんの人権が十分に守られているか事前に審議されたうえで、治験の実施が認められています。

### 1-1 医師主導治験とは？

今回説明をさせていただく臨床試験は、「医師主導治験」と呼ばれるもので、実際の診療に携わる医師が医学的必要性・重要性を検討の上、立案・計画して行うものです。これまで日本では、医療機器を開発するための治験は、医療機器を開発する会社のみが実施することができました。医師は医療機器を開発する会社から依頼を受けて治験をする立場であり、外国での臨床試験の結果などから「この患者さんにこの機器を使ったら効果があるのではないかと考えても、自ら治験を計画して実施することは出来ませんでした。しかし、2002 年に法律（薬事法）が改められ、医学的に必要と考えられる機器について、医師が自ら治験を計画して実施することが出来るようになりました。

## 2. 網膜色素変性と経皮膚電気刺激装置について

〈あなたの病気について〉

あなたの病気は、「網膜色素変性(もうまくしきそへんせい)」と診断されています。網膜色素変性は、目の奥（眼底）で光を感じる組織である網膜に異常がみられる病気で、4000～8000 人に 1 人の割合で起こるといわれています。眼

治験実施計画書番号： CCRC1804  
(第 1.0 版)  
作成日：2021 年 4 月 1 日

底の網膜で眼の中に入った光を感じ、その情報が脳へ送られて映像になります。網膜には 1 億数千万個もの視細胞という光を感知する細胞が集まって構成されています。網膜色素変性はこの視細胞が、遺伝的な要因により機能しなくなってしまう病気です。視細胞が働かなくなった部分は光を感じとれず、映像になりません。

最初に現れる症状は、夜や薄暗い屋内でものが見えにくくなる夜盲(やもう)です。その後、視野(しや)狭窄(きょうさく)が少しずつ進行し、見える範囲が周辺部分から中心に向かい狭くなっていきます。最近は夜でも明るい所が多いので、夜盲ではなく視野狭窄によって発病に気づく人も増えています。続いて視力低下を自覚するようになります。進行性の病気ですが、病状の進行速度には大きな個人差がみられます。症状の進行に伴う視野の狭窄を図 1 に示します。

図 1 網膜色素変性患者さんの視野

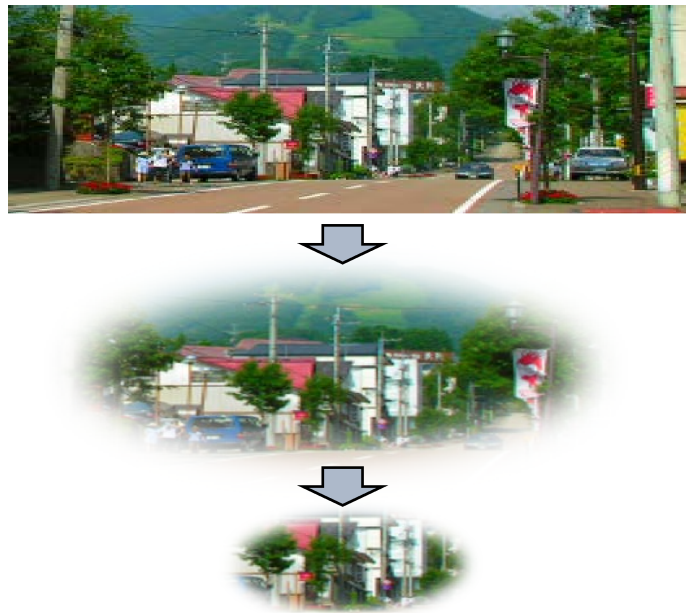

一番上は健康な人の視野。病気の進行と共に視野狭窄が進行し(中段及び下段)、視力も低下してきます。

治験実施計画書番号： CCRC1804  
(第 1.0 版)  
作成日：2021 年 4 月 1 日

網膜の視覚機能がある細胞には二種類があり、暗い所で物の見え方に関係している細胞（かんたいさいぼう 杆体細胞 といいます）と明るい所で細かいものを見分けたり、色を識別する能力に優れていて、おもに視力に関係している細胞（すいたさいぼう 錐体細胞 といいます）です。網膜色素変性では、まず杆体細胞の機能が低下するため、夜盲や視野狭窄が最初の症状になり、さらに病気が進むと錐体細胞に影響し、視力が低下してきます。

#### 〈あなたの病気の治療法について〉

あなたの病気（網膜色素変性）に対しては、あんじゅんのう 暗順応改善薬（アダプチノール）や血流改善薬（ニバジール）、ビタミン剤、酸素が高い濃度になる部屋での一定時間の滞在などが、対症療法（たいしょうりょうほう）的に処方されることもあります。ただ、これらの薬や治療方法が病気の進行を確実に遅らせているという証拠は、今のところ得られていません。

経角膜電気刺激は、コンタクトレンズ型電極を黒目（角膜）の上、もう一方の電極をこめかみに置き、電気刺激装置から電極を通して電気刺激をする方法で、近年、ラットやウサギを用いた動物実験において、網膜の視細胞に対して神経保護的に働くことがわかってきております。そしてこの電気刺激は、ある条件のもと、繰り返し行うことで効果を得られることが分かっています。実際にヨーロッパでは、同様の機序を持つ医療機器が認証を得て臨床使用されていますが、日本国内ではまだ承認されておらず、使用することができません。

また、電極を黒目（角膜）上に置くことで、角膜に傷がついたり、ドライアイになったり、不快感を生じることがあります。それを避けるため、今回は角膜上ではなく皮膚に電極を貼り付けることで電気刺激を行います。

治験実施計画書番号： CCRC1804  
(第 1.0 版)  
作成日：2021 年 4 月 1 日

日本国内では 10 人の網膜色素変性の患者さんに参加頂いた第Ⅱ相試験が終了しています。2 週間毎に 6 回 1 ミリアンペアによる電気刺激を網膜に与えることで、視力と視野(見える範囲)が治療前と比べて改善した結果を得ています。

さらに、患者さんの過去5年間のデータをもとに治療を行わなかった場合の視力の推移と、実際に治療を行った視力の推移を比較したところ、治療による視力改善によって長期的に視力を維持する効果が認められました。

また、電気刺激を行ったことによる身体への悪影響は認められませんでした。

### 3. 治験の目的

この研究の目的は、網膜色素変性の患者さんに対して経皮膚電気刺激療法を実施した際の、治療後の視機能への効果と安全性を調べることです。

### 4. この治験の方法

経皮膚電気刺激治療は、<sup>ひたい</sup>額と両眼の下の皮膚に電極をつけて、電気刺激装置から電極を通して電気刺激をする方法です。本治験では皮膚に電極を装着して刺激するため、角膜などの眼球への障害は無く、低侵襲で眼にやさしい治療です。この治験では、実際に電気刺激を行うグループと、電気刺激を行わないグループに 1:1 で分けて実施します。電気刺激を行わないグループをシャム群と呼びます。

グループ分けは、「無作為化(ランダム化)割り付け」という方法で行います。コンピューターで作成した乱数表を使って、ランダムにグループ分けをする方法です。どちらのグループに入るかは、あなたも担当医師も選ぶことも知ることもできません。そのため、あなたが必ずしも希望するグループに入れられない可能性

治験実施計画書番号： CCRC1804  
(第 1.0 版)  
作成日：2021 年 4 月 1 日

があります。

ご自分がどちらのグループに割り付けられたかが分かっていると、思い込みによって電気刺激の効き方が変わってしまうことがあります。このような思い込みの影響を取り除くため、どちらのグループに割り付けられたかを、あなたにはお知らせせずに治験を行います。あなたの担当医師もあなたがどちらのグループなのかを知ることができませんが、あなたの体調変化に担当医師が責任をもって対応します。

電気刺激を行うグループも行わないグループも図 2 の様に電極を 30 分間付けて頂きます。電気刺激は 1 ミリアンペアの電流を 30 分間流します。安全性の証明された範囲内の電流値ですので、危険性はほとんどありません。これらの療法は 2 週間ごとに 12 回実施します。

どちらのグループの方にも治験期間中に視覚機能に関するアンケートを計 4 回実施します。

シャム群とは・・・シャムとは見せかけの電気刺激のことです。電極を貼りますが電気刺激は行いません。思い込みによる影響を取り除き、効果や安全性を正しく判断するため世界的に認められている科学的な方法です。

#### <刺激条件>

電流強度：1 ミリアンペアあるいは 0 ミリアンペア

パルス幅：10 ミリセカンド/相 双極性あるいは無し

刺激頻度：20 ヘルツあるいは無し

治療時間：30 分

\* 家庭用の低周波電気によるマッサージ機器の最大電流は



治験実施計画書番号： CCRC1804  
(第 1.0 版)  
作成日：2021 年 4 月 1 日

20 ミリアンペアです。

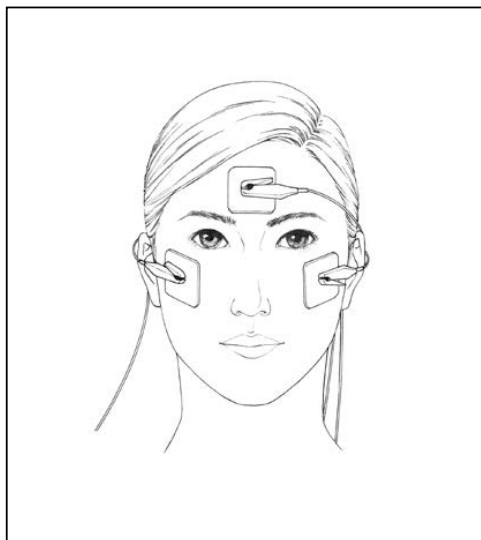

図 2 皮膚電極の装着例

<この治験に参加出来る方・出来ない方>

以下のすべてに該当する方が治験に参加できます。ただし、2)、3) に関して、片眼（評価眼）が以下の基準を満たすこと（両目の場合は、右眼）。

- 1) 年齢が 20 歳以上、80 歳未満
- 2) 小数視力（通常の視力検査のことです）が 0.1 以上、0.7 以下
- 3) 視野がある程度ある方
- 4) 本治験の十分な説明を受け、ご自分の意思で同意書に署名される方
- 5) 2 週おきに 24 週間、その後 36 週目と 48 週目に来院可能な方
- 6) 適切な避妊を行うことができる方

また、上記に該当する方でも、以下のいずれかに該当する方は治験に参加できません。ただし、2)、5)、6) に関しては評価する眼が以下のいずれかに該当する方は参加できません。

- 1) 眼の病気に対する電気刺激治療を受けた方

治験実施計画書番号： CCRC1804  
 (第 1.0 版)  
 作成日：2021 年 4 月 1 日

- 2) 3 か月以内に白内障などの眼の中の手術を受けた方
- 3) 網膜色素変性用のお薬（ウノプロストン点眼薬、カルシウム拮抗薬、暗順  
 応改善薬）の使う量もしくは使い方を約 1 か月以内に変えた方
- 4) 治験期間中に使用する予定のお薬（散瞳薬、点眼麻酔薬など）に対し、ア  
 レルギーを起こしたことがある方
- 5) 網膜色素変性の他に以下の病気が眼にあると診断された方
 

しょうたいおうはんけんいんしょうこうぐん おうはんふしゅ おうはんぜんまく  
 硝子体 黄斑 牽引 症候群、黄斑 浮腫、黄斑 前膜、後部ぶどう腫を伴う強  
 度近視のある おうはんびょうへん とうようびょうもうまくしょう がいがんび  
 黄斑 病変、糖尿病 網膜症、外 眼部 の炎症、感染症、重  
 度のドライアイ、もうまくちゅうしんどうみやくへいそくしょう こうぶきよけつせいしんけいしょう  
 網膜 中心 動脈 閉塞症、後部 虚 血性 視神経症、眼の  
 すいしょうたい かくはくないしょう  
 水晶体 が茶色より濃く濁った 核 白内障、視力に重大な影響を及ぼすよ  
 うな ぜんのうか こうのうか はくないしょう こうはつはくないしょう しんけいしっかん  
 前囊下 及び 後 囊下 白内障、後発 白内障、視神経 疾患
- 6) 最近 3 年間の視力検査などのデータに変化のない方
- 7) ペースメーカーもしくは除細動器が植え込まれている方
- 8) 悪性腫瘍と診断され治療中もしくは治療終了後 5 年以内の方
- 9) 認知症、神経疾患と診断され治療中の方
- 10) 糖尿病のコントロールが悪い方、血糖値が高い（<sup>ヘモグロビンエーワンシー</sup>HbA1c が 10%  
 を超えている）方
- 11) 高血圧の治療を行っているが血圧が高い（最高血圧が 180 mmHg 以  
 上、かつ/又は、最低血圧が 110 mmHg 以上）方
- 12) 肝臓及び腎臓の機能に障害がある方
  - 肝臓から出る酵素の AST (GOT)、かつ/又は、ALT (GPT) が施設  
 基準値の 3 倍を超える方

治験実施計画書番号： CCRC1804  
(第 1.0 版)  
作成日：2021 年 4 月 1 日

- 腎臓の機能を知る指標の血清クレアチニンが施設基準値の 1.5 倍を超える方

13) 妊娠、授乳中（授乳を中止する場合も含む）又は本治験中に妊娠を希望している方

治験参加にご同意いただいてから、治療前の視力検査、眼圧測定、眼底検査などの検査を行います。治療開始後は 2 週毎に、24 週間（約 6 か月間）の通院による治療を受けて頂き、その後 12 週間毎に 2 回通院して頂きます。通院時に行う検査としては、視力検査、眼圧測定、眼底検査、視野検査、などがあります。

治験実施計画書番号： CCRC1804  
(第 1.0 版)  
作成日：2021 年 4 月 1 日

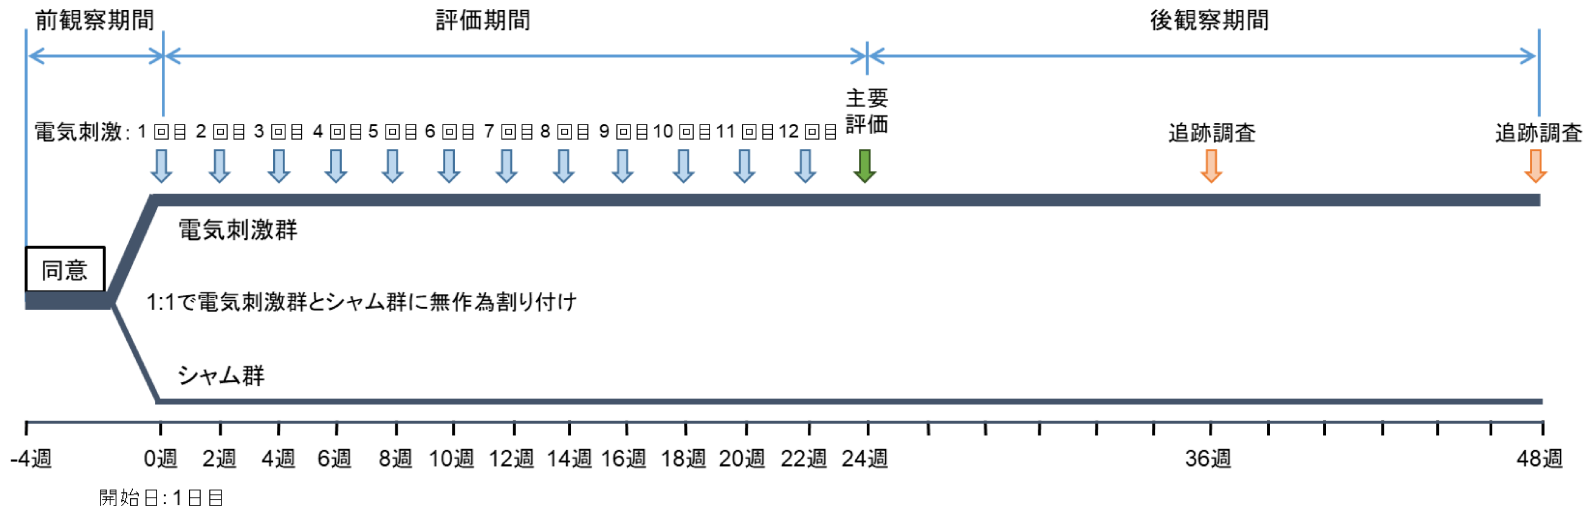

↓ : 通院

↓ : 治療効果を見る通院日

↓ : 追跡調査のための通院日

治験実施計画書番号： CCRC1804  
(第 1.0 版)  
作成日：2021 年 4 月 1 日

## 検査スケジュール

この治験では、次項の表 1. に示されている検査を行います。また、この治験の検査項目及び検査頻度は通常の治療の際に行う検査項目及び検査頻度とほぼ変わらないため、治験に参加したことにより通院の負担が極端に多くなるということはありません。

新型コロナウイルス感染症の影響（ご自身の感染、濃厚接触者と判断される、治験実施施設の外来が閉鎖等）で来院が出来なくなった場合でも治験は継続いたしますので、担当医師又は治験コーディネーターにご連絡下さい。次の来院等のスケジュールについてご相談させていただきます。

また、スクリーニング検査期間に最近 3 年間であなたの見えかたに変化がなかったかどうかを以前受診されていた眼科に確認することがあります。

効果に関する眼の検査（logMAR 視力；矯正小数視力、ETDRS 視力、静的視野検査 10-2 プログラム、静的視野検査 エスターマンテスト、光干涉断層計；網膜の検査）は片眼（評価眼）にのみ実施しますが、安全性に関する眼の検査（細隙灯検査、眼圧・眼底検査）は両眼に実施します。



治験実施計画書番号： CCRC1804

(第 1.0 版)

作成日：2021 年 4 月 1 日

| 項目                             | 時期 | 治療期間（14～24週）                                                                         |       |       |       |       |       | 後観察期間 |       | 中止時 |
|--------------------------------|----|--------------------------------------------------------------------------------------|-------|-------|-------|-------|-------|-------|-------|-----|
|                                |    | 14週                                                                                  | 16週   | 18週   | 20週   | 22週   | 24週   | 36週   | 48週   |     |
| 受診                             |    | 受診 9                                                                                 | 受診 10 | 受診 11 | 受診 12 | 受診 13 | 受診 14 | 受診 15 | 受診 16 |     |
| 許容範囲(日)                        |    | ±4                                                                                   | ±4    | ±4    | ±4    | ±4    | ±4    | ±14   | ±14   | +7  |
| 経皮膚電気刺激治療                      |    | ●                                                                                    | ●     | ●     | ●     | ●     |       |       |       |     |
| 自覚症状 <sup>a</sup>              |    | ●                                                                                    | ●     | ●     | ●     | ●     | ●     | ●     | ●     | ●   |
| 血圧 <sup>b</sup>                |    | ○                                                                                    | ○     | ○     | ○     | ○     | ○     | ○     | ○     | ○   |
| 臨床検査(採血) <sup>c</sup>          |    |                                                                                      |       |       |       |       |       |       |       | ○   |
| logMAR 視力(矯正小数視力) <sup>d</sup> |    | ●                                                                                    | ●     | ●     | ●     | ●     | ●     | ●     | ●     | ●   |
| ETDRS 視力                       |    |                                                                                      |       |       |       |       | ●     | ●     | ●     | ●   |
| 静的視野検査 10-2 プログラム <sup>e</sup> |    |                                                                                      |       |       |       |       | ●     | ●     | ●     | ●   |
| 静的視野検査 エスターマンテスト <sup>e</sup>  |    |                                                                                      |       |       |       |       | ●     | ●     | ●     | ●   |
| 光干渉断層計 <sup>f</sup> (網膜の検査)    |    |                                                                                      |       |       |       |       | ●     | ●     | ●     | ●   |
| NEI VFQ 25 コンポネンツ <sup>g</sup> |    |                                                                                      |       |       |       |       | ●     | ●     | ●     | ●   |
| 細隙灯検査(両眼)                      |    |                                                                                      |       |       |       |       | ●     | ●     | ●     | ●   |
| 眼圧・眼底検査(両眼) <sup>f</sup>       |    |                                                                                      |       |       |       |       | ●     | ●     | ●     | ●   |
| 妊娠検査 <sup>h</sup>              |    |                                                                                      |       |       |       |       |       |       |       | ○   |
| 有害事象の観察 <sup>i</sup>           |    | 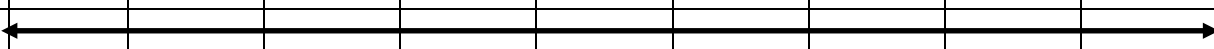 |       |       |       |       |       |       |       |     |

●：実施 ○：必要な時に実施

治験実施計画書番号： CCRC1804  
(第 1.0 版)  
作成日：2021 年 4 月 1 日

なお、本治験に関わるデータは、同意取得前のデータも使用する場合があります。

<表 1.の注釈説明>

- a) 自覚症状は経皮膚電気刺激治療実施前後に実施します。36 週目及び 48 週目ではその間の体調の変化に関しましてもお聞きします。
- b) 血圧はあなたがこの治験に入れるかどうかの検査（スクリーニング検査）時に測定し、治験期間中は病院に来られた時に必要に応じて測定します。
- c) 臨床検査はあなたの全身状態の確認のため 11 ミリリットル程度採血して実施します。検査項目は、一般的な健康診断時の項目 (ALT (GPT)、AST (GOT)、ALP、総ビリルビン、尿素窒素 (BUN)、血清クレアチニン、<sup>ヘモグロビンエーワンシー</sup> HbA1c、赤血球、白血球、ヘモグロビン、血小板) です。
- d) 眼鏡を掛けての視力測定を実施します。測定値から logMAR 視力を算出します。
- e) スクリーニング検査で、静的視野検査の計測値で信頼性が確認できなかった場合には、再測定する場合があります。
- f) 光干渉断層計（網膜の検査）と眼底検査は散瞳してから実施します。
- g) スクリーニング検査期間及び治療開始後 12,24,48 週間目あるいは治験中止時に視覚機能に関するアンケート (NEI VFQ 25 コンポ9) にお答えいただきます。アンケート用紙をお渡しいたしますので、ご自身で記載いただき担当医師又は治験コーディネーターにお渡しください。
- h) 妊娠可能な女性のみ尿中 hCG 検査を実施します。
- i) 有害事象とは副作用など好ましくないすべての事象のことです。治験治療との因果関係は問いません。
- j) スクリーニング検査は複数日に分けて実施することも可能です。



治験実施計画書番号： CCRC1804  
(第 1.0 版)  
作成日：2021 年 4 月 1 日

あなたが他の病院に通院されている場合は、その病院名と病名、使用しているお薬をお知らせ下さい。また、薬局等で購入して使用しているお薬がある場合もお知らせ下さい。これらは、治験を安全に行うために大切なことです。また、あなたが他の病院に通院されている場合は、この治験に参加していることをその病院にお知らせすることがありますので、ご了解下さい。

## 5. この治験の参加予定期間

この治験の参加予定期間は、前観察期間（31日間）、治療期間（24週間）及び後観察期間（24週間）の合計約12ヶ月となります。

また、この治験を行う期間は、2021年4月～2023年3月です。患者さんへのご案内は、2021年4月～2022年3月まで行います。

## 6. 予定人数

この治験は、日本全国で行われ、合計50名の網膜色素変性の患者さんに参加していただく予定です。

## 7. 利益と不利益

<予測される利益と不利益>

### 1) 利益（効果など）について

この治療を行うことによって、錐体細胞死による視機能の障害の進行速度を緩徐にすることが期待できます。あなたがこの治験に参加する事で得られた情報が将来的に網膜色素変性症の患者さんの助けになる可能性があります。しか

治験実施計画書番号： CCRC1804  
(第 1.0 版)  
作成日：2021 年 4 月 1 日

し、あなた自身が何らかの利益を得られる保証はありません。

## 2) 不利益（副作用など）について

以下のような不利益や副作用が考えられます。まず、治療を行ったにもかかわらず十分な効果が得られない場合があります。電気刺激ではとても少ない量の電流を流します。人によっては電極装着部位にピリピリとしたわずかな刺激を感じたり、視界の中に疑似光覚（フォスフェンとも呼びます）と呼ばれる光の波（太陽やストロボなど強い光を見た後に生じる光の残像の様なもの）を感じたりする方がいます。電気刺激を終了するといずれも感じなくなります。

今回の治験では、安全性の証明された範囲内の電流を流しますので、電気刺激自体の合併症が生じる可能性は非常に低いと推測されますが、本治験で使用する治療機器は治験機器提供者（有限会社メイヨー）と共同で新たに開発・作製したものであるため、眼及び眼周辺の器官に対する影響は厳密には確定していません。そのため眼及び眼周辺の器官において有害事象（何らかの症状）が発生する可能性は否定できません。予測される有害事象としては、電極装着部位に一致した皮膚の炎症を生じる可能性があります。軽度の炎症でしたら自然に治りますが、万が一重度の炎症を生じた場合には、適切な治療を行います。

治験に入って頂くための臨床検査を実施する際、採血を実施します。採血時に注射針をさすため、チクッと痛みを感じます。また、止血が不十分だと内出血を起こすことがあります。その際は自然に吸収されます。

この治験ではシャム群を設定しております。シャム群の治療になった場合も診察や検査も電気刺激を受けられる方と同様に通院していただきます。

治験実施計画書番号： CCRC1804  
(第 1.0 版)  
作成日：2021 年 4 月 1 日

## 8. 他の治療法

網膜色素変性という病気は、現在有効な治療法がありません。これまでと同様に通院していただき、その時の視機能を最大限活用できるよう支援をします。眼の合併症に関しても、適切に治療いたします。

## 9. 治験への参加を中止する場合について

あなたに治験参加の同意をいただいた後でも、この治験で事前に決められている基準に合わないことが判った場合には、治験への参加をお断りしたり、治験を中止することがありますのでご了承ください。

治験機器治療を開始した後に以下に該当することがわかった場合には、この治験への参加を中止させていただきますのでご了承ください。

- ・ 好ましくない症状などが発現し、治験機器の使用を中止すべきであると、担当医師が判断した場合
- ・ 病気の状態が変化（悪化）し、この治験を続けることが困難であると、担当医師が判断した場合
- ・ この治験で使用が禁止されている薬や療法を行った場合や行わざるを得なくなった場合
- ・ 転院や引越しなどにより、規定の通院を続けられない場合
- ・ その他、担当医師が治験を中止すべきであると判断した場合

また、これらの他に、治験の安全性に重大な影響があると考えられる情報が得られた場合など、治験を中止・中断させていただく場合もあります。治験を中止した場合にはその理由を説明させていただき、健康上に問題がないかを確認さ

治験実施計画書番号： CCRC1804  
(第 1.0 版)  
作成日：2021 年 4 月 1 日

させていただきます。

## 10. 新たに重要な情報が得られた場合について

この治験の参加の継続について、あなたの意思に影響を与える可能性がある  
と判断される、重要な有効性や安全性等に関する新しい情報が得られた場合に  
は、速やかにお知らせします。その場合、引き続き治験に参加するかどうか、改  
めて判断していただくことになります。

## 11. 治験に関連した健康被害の治療について

この治験は、科学的に計画され慎重に行われますが、あなたが治験参加に同意  
された後、治験中又は治験が終わった後に、この治験が原因となった健康障害が  
生じたときには、担当医師又は治験コーディネーターまでお知らせください。そ  
の時点で最善と思われる処置を行い、適切に対処した上で補償します。その際の  
医療費の一部については、あなたが加入している健康保険が使用されますので、  
一部あなた自身にご負担いただくことになります。ただし、健康被害に関して虚  
偽の申告をしたり、担当医師の指示に従わず、その障害があなた自身の過失や故  
意によるものである場合には、補償が受けられないこともあります。補償につ  
いて詳しく説明を受けたい場合は、担当医師あるいは「18. 治験に関する相談窓  
口」にお問い合わせ下さい。補償について詳しい内容をご希望の方は資料をお渡  
しします。

## 12. 治験に参加された場合の費用について

### 1) 治験期間中の医療費について

治験実施計画書番号： CCRC1804  
(第 1.0 版)  
作成日：2021 年 4 月 1 日

この治験に参加いただいた場合、この治験機器による治療自体は治験機器提供者（有限会社メイヨー）より無償で提供され、それに対する費用は発生しません。しかし、診察料や検査代、通常使用されている薬剤等の費用は従来どおり健康保険の種類に応じてご負担していただくことになります。

## 2) 治験中の費用の負担軽減について

治験に参加していただけることになった場合、治験のための診察や検査のために、来院する回数が通常の診療より増え、それに伴い交通費などの負担が増えることがあります。この負担を軽くするため、この治験の検査スケジュール表で決められた日の来院 1 回につき 7,000 円をお支払いします。お支払いは、病院からあなたの指定する銀行又は信用金庫の口座に振り込ませていただきます。

また、かかりつけの病院や他の医療機関で治療を受けた場合に、他院の担当医師へ電話や手紙で連絡をとり、医療情報の提供を求める場合があります。その際に他院から患者さんの情報を提供していただくにあたって、情報提供料としてあなたの費用負担が増える場合があります。その際は、あなたに給付される負担軽減費の中からお支払いいただくようお願い致します。

## 13. カルテなどの医療記録の閲覧と参加者の秘密の保全について

治験にご協力いただいた個人が特定されるような情報は厳重に保護され、外部に出されることはありません。患者さんから得られたデータがコード番号などに置き換えられ、報告書等でその患者さんのものであると特定されないような取扱いをいたします。

この治験の結果およびあなたの過去5年間の検査結果の解析結果（以下、「治験のデータ」とします）は、国（厚生労働省）から経皮膚電気刺激療法を網膜色

治験実施計画書番号： CCRC1804  
(第 1.0 版)  
作成日：2021 年 4 月 1 日

素変性の治療法として認めってもらうために、厚生労働省に提出されることになります。またこの治験機器の効果や安全性についてより詳細に検討するために、治験のデータとして使用された検査・画像などの治験機器の評価に必要なデータを外部の機関へ提出することがあります。さらに、この治験から得られた情報は、各地の病院から集められた記録をまとめて、学会や医学雑誌等に公表されることもあります。しかし、いずれの場合も、あなたのお名前などが用いられることはなく、あなたの個人情報（氏名、住所、電話番号等）は秘密事項として保護され、外部に漏れないように努めます。

また、治験がきちんと行われているかどうかを調べるために、治験機器の開発支援機関の担当者、この病院の治験審査委員会および厚生労働省など規制当局の職員が、カルテなどのあなたの医療に関する記録を閲覧することがあります（他科の診療記録や治験参加以前の期間も含まれます）。このような場合でもこれらの関係者には秘密を守る義務が課せられており、患者さんのプライバシーは守られます。

さらに、他の医療機関で治療を受けた場合も、他院の担当医師へ電話や手紙で連絡をとり、医療情報の提供を求める場合があります。あなたがこの説明文書の最後にある同意文書に署名することにより、記録を閲覧することおよび他の医療機関からの情報収集に関しても承諾していただいたことになります。

あなたは、診療情報の利用についていつでも同意を取り消すことができますが、その後はこの治験に参加いただけなくなりますのでご了承ください。同意を取り消したい場合は担当医師又は病院の治験コーディネーターにお伝えください。なお、同意を取り消すまでに収集された治験データは、上記と同様に利用されますが、同意を取り消された後は、この治験が正しく行われたかどうかを確認するような場合を除いて、あなたの診療情報が利用されることはありません。

治験実施計画書番号： CCRC1804  
(第 1.0 版)  
作成日：2021 年 4 月 1 日

#### 1 4. 知的財産権と利益相反について

本治験の結果が特許権等の知的財産を生み出す可能性があります。その場合の知的財産権は研究者もしくは所属する研究機関に帰属します。また、本治験の実施に関して、利益相反\*（起こりうる利害の衝突）が存在しないことを確認しています。

\*利益相反とは：たとえば製薬会社や医療機器製造会社から資金提供その他を受けている場合に自己や製薬会社、医療機器製造会社の利益を図り、患者さんの安全を損なったりデータの解釈をゆがめてしまう行為のことです。

#### 1 5. 治験に参加いただくことは自由です

この治験に参加するか否かの決定は、あなた自身の意思に委ねられます。また、治験に参加している途中でも、いつでも自由にやめることができます。もし参加していただかなくても、あなたが今後の治療を受ける上で不利な扱いを受けることは決してありません。

#### 1 6. 患者さんに守っていただきたいことについて

この治験への参加に同意していただいた場合は、次の事項をお守りください。

- 1) 治験参加期間中は、治験のスケジュールに従ってください。
- 2) 治験期間中に新型コロナウイルス感染症であると診断された場合および濃厚接触者と判断された場合は、出来るだけ早く担当医師又は治験コーディネーターに電話でご連絡下さい。新しい来院日を検討しお知らせいたします。
- 3) 現在、他の診療科や病院を受診している場合、またはくすりを飲んでいる

治験実施計画書番号： CCRC1804  
(第 1.0 版)  
作成日：2021 年 4 月 1 日

場合は、担当医師又は治験コーディネーターにその状況を詳しくお話下さい。その治療を行っている医師に、あなたがこの治験に参加されていることをお伝えさせていただきます。

また、市販のくすりを飲む場合も、前もって担当医師又は治験コーディネーターにご相談ください。

- 4) 治験中に行われる検査は、あなたの症状の変化や副作用を知るうえで大変重要なものになりますので、担当医師及び治験コーディネーターの指示に従って受けてください。
- 5) 治験機器を使用している間に、体調の変化など何か変わったことがあった場合は、担当医師あるいは治験コーディネーターにお知らせください。
- 6) 治験参加に同意いただいてから治療開始後 48 週の最終観察が終了するまでの治験参加期間は他の試験には参加しないでください。
- 7) その他にも、担当医師からの注意事項や指示にしたがってください。

## 17. 治験を審査する委員会

この治験は、以下の治験審査委員会で、科学のおよび医学的な面だけでなく、患者さんの安全や人権も含めた倫理的面からも審査されています。治験審査委員会は、医療を専門としない委員や、当院と利害関係のない委員も含まれていません。

- 1) 名称：千葉大学医学部附属病院 治験審査委員会
- 2) 設置者：千葉大学医学部附属病院長
- 3) 所在地：〒260-8677 千葉県千葉市中央区亥鼻 1-8-1

治験を開始した後も、上記の内容が変更された場合、重篤な副作用の発現といった安全性情報が得られた場合など、この治験を継続して良いかを、当院の病院



治験実施計画書番号： CCRC1804  
(第 1.0 版)  
作成日：2021 年 4 月 1 日

長からの依頼に応じて審査します。

審査の結果は当院の病院長に報告され、院長はその報告内容を基<sup>もと</sup>に当院での治験の開始、継続を決定します。

なお、治験審査委員会の手順書（審査の進め方を示した文書）、議事概要（話し合いの記録）や委員のリストなどの情報について知りたい場合は、ホームページ上でご確認ください。（[URL:http://www.ho.chiba-u.ac.jp/](http://www.ho.chiba-u.ac.jp/)）

治験実施計画書番号： CCRC1804  
(第 1.0 版)  
作成日：2021 年 4 月 1 日

## 18. 治験に関する相談窓口

この治験ならびに治療の内容について、わからない言葉や、疑問、質問、もう一度聞きたいこと、更に詳細な情報を知りたいなどがありましたら、遠慮せずにいつでもお尋ねください。治験が始まった後でも、わからないことがあれば、なんでもお答えいたします。また、この治験機器を使うことになにか心配がありましたら、いつでも遠慮なく私たちにご連絡ください。

以上、この治験の内容について十分ご理解いただいた上で、この治験への参加に同意していただける場合は、この説明文書の最後にある同意文書に同意年月日の記載と署名をお願いいたします。

この説明文書と同意文書（患者さん用）は大切に保管してください。

病院名：千葉大学医学部附属病院

治験責任医師：三浦 玄（職名：助教）

あなたの担当医師： \_\_\_\_\_

### 相談窓口

平日(8:30-17:00)

眼科外来

電話：043-222-7171（代表）

内線：6802

臨床試験部 治験コーディネーター室

電話：043-226-2630（直通）

夜間休日電話対応窓口

電話：043-222-7171（代表）

※眼科で治験に参加している旨をお伝えください。

治験実施計画書番号： CCRC1804  
(第 1.0 版)  
作成日：2021 年 4 月 1 日

医師用

## 同 意 文 書

私は、「網膜色素変性を対象とした経皮膚電気刺激の有効性及び安全性に関する  
検証的試験」に参加するにあたり、治験の内容について説明を受け、十分に理解  
した上で、自らの自由意思により本治験に参加することに同意します。

また、治験に関する負担軽減費の支払いを受けることに

同意します

同意しません（負担軽減費はいただきません）

（どちらかの口にチェックしてください）

附随研究：私の過去のカルテ上の記録を附随研究に使用することに

同意します（使用を許可します）

同意しません

（どちらかの口にチェックしてください）

同意日：西暦 \_\_\_\_\_ 年 \_\_\_\_\_ 月 \_\_\_\_\_ 日

本人（署名又は記名捺印）： \_\_\_\_\_

担当医師 説明日：西暦 \_\_\_\_\_ 年 \_\_\_\_\_ 月 \_\_\_\_\_ 日 署名： \_\_\_\_\_

説明補助者 説明日：西暦 \_\_\_\_\_ 年 \_\_\_\_\_ 月 \_\_\_\_\_ 日 署名： \_\_\_\_\_

治験実施計画書番号： CCRC1804  
(第 1.0 版)  
作成日：2021 年 4 月 1 日

病院用

## 同意文書

私は、「網膜色素変性を対象とした経皮膚電気刺激の有効性及び安全性に関する検証的試験」に参加するにあたり、治験内容について説明を受け、十分に理解した上で、自らの自由意思により本治験に参加することに同意します。

また、治験に関する負担軽減費の支払いを受けることに

同意します

同意しません（負担軽減費はいただきません）

（どちらかの口にチェックしてください）

附随研究：私の過去のカルテ上の記録を附随研究に使用することに

同意します（使用を許可します）

同意しません

（どちらかの口にチェックしてください）

同意日：西暦 \_\_\_\_\_ 年 \_\_\_\_\_ 月 \_\_\_\_\_ 日

本人（署名又は記名捺印）： \_\_\_\_\_

担当医師 説明日：西暦 \_\_\_\_\_ 年 \_\_\_\_\_ 月 \_\_\_\_\_ 日 署名： \_\_\_\_\_

説明補助者 説明日：西暦 \_\_\_\_\_ 年 \_\_\_\_\_ 月 \_\_\_\_\_ 日 署名： \_\_\_\_\_

治験実施計画書番号： CCRC1804  
(第 1.0 版)  
作成日：2021 年 4 月 1 日

**患者さん用**

## 同意文書

私は、「網膜色素変性を対象とした経皮膚電気刺激の有効性及び安全性に関する検証的試験」に参加するにあたり、治験の内容について説明を受け、十分に理解した上で、自らの自由意思により本治験に参加することに同意します。

また、治験に関する負担軽減費の支払いを受けることに

同意します

同意しません（負担軽減費はいただきません）

（どちらかの口にチェックしてください）

附随研究：私の過去のカルテ上の記録を附随研究に使用することに

同意します（使用を許可します）

同意しません

（どちらかの口にチェックしてください）

同意日：西暦 \_\_\_\_\_ 年 \_\_\_\_\_ 月 \_\_\_\_\_ 日

本人（署名又は記名捺印）： \_\_\_\_\_

担当医師 説明日：西暦 \_\_\_\_\_ 年 \_\_\_\_\_ 月 \_\_\_\_\_ 日 署名： \_\_\_\_\_

説明補助者 説明日：西暦 \_\_\_\_\_ 年 \_\_\_\_\_ 月 \_\_\_\_\_ 日 署名： \_\_\_\_\_
