# Supplementary material for: Evaluating the efficacy and safety of transdermal electrical stimulation on the visual functions of patients with retinitis pigmentosa: a clinical trial protocol for a prospective, multicentre, randomised, double-masked and sham-controlled design (ePICO trial)
Source: PubMed Central journal article supplement — BMJ Open. 2022 May 6;12(5):e057193. doi: 10.1136/bmjopen-2021-057193 (PMC9083404; doi:10.1136/bmjopen-2021-057193), 2022-05-06
Supplement: bmjopen-2021-057193supp003.pdf [file bmjopen-2021-057193supp003.pdf]

治験機器の提供及び管理に関する手順書 3.0 版  
作成年月日：2021 年 9 月 10 日

## 治験機器の提供及び管理に関する手順書

網膜色素変性を対象とした経皮膚電気刺激装置の  
有効性及び安全性を検証するシャム対照二重遮蔽比較試験

自ら治験を実施する者

〇〇病院  
〇〇科  
〇〇 〇〇

治験調整医師（代表）

千葉大学医学部附属病院  
特任教授 山本 修一

治験機器提供者

有限会社メイヨー

治験機器の提供及び管理に関する手順書 3.0 版  
作成年月日：2021 年 9 月 10 日

## 目次

|                                                         |    |
|---------------------------------------------------------|----|
| 1. 目的及び適用範囲 .....                                       | 4  |
| 2. 用語の定義 .....                                          | 4  |
| 3. 治験機器の概要 .....                                        | 4  |
| 3.1. 名称 .....                                           | 4  |
| 3.2. 形状、構造及び寸法 .....                                    | 5  |
| 3.3. 滅菌 .....                                           | 5  |
| 3.4. 治験機器製造及び提供者 .....                                  | 5  |
| 4. 包装仕様 .....                                           | 5  |
| 4.1. ラベル .....                                          | 5  |
| 4.2. 輸送時の包装形態 .....                                     | 5  |
| 5. 保存条件 .....                                           | 5  |
| 6. 治験機器の管理方法 .....                                      | 6  |
| 6.1. 治験機器の納入準備及び依頼 .....                                | 6  |
| 6.2. 治験機器の納入 .....                                      | 6  |
| 6.3. 治験機器の追加納入 .....                                    | 6  |
| 6.4. 治験機器の保管・管理 .....                                   | 6  |
| 6.5. 治験機器出庫の準備 .....                                    | 6  |
| 6.6. 治験機器の出庫 .....                                      | 6  |
| 7. 使用方法 .....                                           | 7  |
| 7.1. 治験機器の使用前点検 .....                                   | 7  |
| 7.2. 使用前準備 .....                                        | 7  |
| 7.3. 設定 .....                                           | 9  |
| 7.4. 経皮膚電気刺激の施行 .....                                   | 9  |
| 7.5. 治療の一時中断/再開 .....                                   | 10 |
| 7.6. 非常停止 .....                                         | 10 |
| 8. 不具合及び不測の事態への対応 .....                                 | 11 |
| 9. 治験機器の保管場所への返還 .....                                  | 11 |
| 10. 治験期間中の治験機器保管 .....                                  | 11 |
| 11. 保守 .....                                            | 11 |
| 12. 治験機器の治験機器提供者への返却 .....                              | 12 |
| 12.1. 不具合及び不測の事態発生時の治験機器提供者への返却 .....                   | 12 |
| 12.1.1. 使用前準備から保管庫への返還までに生じた盲検性維持に関する配慮が必要な不具合の場合 ..... | 12 |
| 12.1.2. 盲検性維持に係る配慮が不要な際の不具合等 .....                      | 12 |
| 12.2. 未使用治験機器の取扱い .....                                 | 12 |
| 12.3. 使用済治験機器の取扱い .....                                 | 12 |

治験機器の提供及び管理に関する手順書 3.0 版  
作成年月日：2021 年 9 月 10 日

|                                 |    |
|---------------------------------|----|
| 12.4. 未使用治験機器及び使用済治験機器の返却 ..... | 12 |
| 13. 治験に関する医師等に対するガイダンス .....    | 13 |
| 13.1. 禁忌 .....                  | 13 |
| 13.2. 警告 .....                  | 13 |
| 13.3. 注意 .....                  | 13 |
| 14. 資料等の保管 .....                | 13 |
| 15. 改訂履歴 .....                  | 14 |

治験機器の提供及び管理に関する手順書 3.0 版  
作成年月日：2021年9月10日

## 1. 目的及び適用範囲

本手順書は、自ら治験を実施する者、治験機器管理者、治験機器提供者及び治験調整医師（治験調整委員会）が、治験機器の授受、取り扱い、保管・管理、保守、治験機器の返却等を適切に行うための手順及びその他必要な事項を定めるものである。

## 2. 用語の定義

本手順書においては、下記の通り定める。

- ・ 治験責任医師：自ら治験を実施する者をいう。
- ・ 治験機器管理者：実施医療機関の長から指名された者をいう。
- ・ 治験機器管理補助者：治験責任医師から指名された者でアンブラインドスタッフとなる。
- ・ 治験調整医師：複数の実施医療機関において治験を行う場合に、自ら治験を実施する者により調整業務の委嘱を受けて当該業務を行う医師又は歯科医師をいう。
- ・ 治験調整委員会：複数の実施医療機関において治験を行う場合に、自ら治験を実施する者により調整業務の委嘱を受けて当該業務を行う医師又は歯科医師で構成される委員会をいう。
- ・ CRC：治験コーディネーター
- ・ CRA：臨床開発モニター
- ・ アンブラインド（非盲検）スタッフ：治験機器の治療用設置・返却及び治験機器による治療の施行のみに係る治験分担医師、治験機器管理補助者及びCRC等をいい、治験責任医師により指名される。アンブラインドスタッフは、アクセスが厳密に管理されたEDCの割付情報を知ることが出来る。アンブラインドスタッフは治験機器の不具合報告を治験機器提供者に実施し、治験責任医師に不具合があった旨の報告をする。アンブラインド治験分担医師及びCRCは治験機器による治療の準備、施行及び治験機器の片付け以外の治験業務には関与しない。アンブラインドの治験機器管理補助者は治験機器の管理を補佐する。
- ・ ブラインド（盲検）スタッフ：被験者の割付情報に関してキーオープン（開鍵）まで知り得ない治験構成員（スタッフ）である治験調整医師、治験責任医師、治験機器管理責任者、CRC及び眼科視能訓練士等をいう。治験機器管理責任者は、治験機器の納品・返却を管理するが、盲検維持のため、治験機器の出庫や返却管理はアンブラインド治験管理補助者に一任し、治験機器管理の整合性に責任を負う。

## 3. 治験機器の概要

### 3.1. 名称

一般名（仮）：経皮膚電気刺激装置

販売名（仮）：皮膚電極網膜賦活化刺激装置（眼科用電気刺激装置）

治験機器の提供及び管理に関する手順書 3.0 版  
作成年月日：2021 年 9 月 10 日

### 3.2. 形状、構造及び寸法

形状、構造：詳細は治験機器概要書による。

本体、電極パッド、電極リード線、AC アダプター（含む、電源コード）から構成される。

寸法：本体 140×100×69 mm

重量：約 300 g

### 3.3. 滅菌

なし

### 3.4. 治験機器製造及び提供者

有限会社メイヨー

〒492-8213 愛知県稲沢市高御堂 2-25-22

Tel: : 0587-33-0120

## 4. 包装仕様

### 4.1. ラベル

治験機器の外箱及び内包に次のラベル表示がされている。

|                                   |                 |
|-----------------------------------|-----------------|
| 治験用                               | 経皮膚電気刺激装置（型番記載） |
| <注意>                              |                 |
| ・未使用機器は破棄せずに保管して治験機器提供者に返却してください。 |                 |
| ・治験以外には絶対使用しないでください。              |                 |
| <保存条件> 高温、多湿、直射日光を避けて保管すること。      |                 |
| 治験調整医師：山本 修一                      |                 |
| 職名：特任教授                           |                 |
| 住所：千葉県千葉市中央区亥鼻 1-8-1              |                 |
| 製造番号： _____                       |                 |

治験責任医師は、ラベルに治験調整医師の職名及び経皮膚電気刺激装置の製造番号（機器番号）が記載されていることを確認する。

### 4.2. 輸送時の包装形態

<内包> エアパックによる包装

<外箱> 段ボール箱

## 5. 保存条件

- 1) 室温で保存する。
- 2) 開封後は直射日光及び高温・高湿を避けること。
- 3) 保管は治験機器一式を明確に識別し保存する。電源を OFF にし、コンセントから外して上記環境下で安全に保管する。機器に関し異常を発見した場合は、治験責任医師、治験分担医師もしくは治験機

治験機器の提供及び管理に関する手順書 3.0 版  
作成年月日：2021 年 9 月 10 日

器管理者から速やかに有限会社メイヨーに連絡をし、点検により異常処置をして結果を治験担当医師に報告する。尚、治験機器管理者が予備機を代替提供する場合はその旨の記録を治験機器管理表に残す。

## 6. 治験機器の管理方法

### 6.1. 治験機器の納入準備及び依頼

- 1) 治験責任医師は、原則、納入希望日の 7 営業日前までに、「治験機器提供依頼書（様式 1）」により、治験機器提供者及び治験調整医師（代表）に治験機器の納入希望数量、納入先、納入希望日時等を連絡する。

### 6.2. 治験機器の納入

- 1) 治験責任医師又は治験機器管理者は、「治験機器納入書 兼 受領書（様式 2）」とともに治験機器、治験機器の製造年月日、製造数量等の製造に関する記録及び治験機器の品質に関する試験の記録等を治験機器提供者から受領する。提供された治験機器（電気刺激装置、電極コード、附属品一式及び電極パッド）の各数量及び治験機器に損傷等がないかを確認後、通電し各種ランプ及び液晶ディスプレイが正常に表示される等の動作確認を実施する。問題がなければ必要項目を治験機器管理表に記載し、以後の治験機器の出納を管理する。
- 2) 問題がないことを確認した上で、治験責任医師は、「治験機器納入書 兼 受領書（様式 2）」を治験機器提供者へ提出し、原本を適切に保管する。
- 3) 納入時に問題があった場合は、治験機器提供者に問い合わせをするとともに、11.9 及び 11.10 の手順に従い、「不具合等報告書（不具合・返却・紛失・廃棄） 兼 回収書（様式 3）」の作成及び当該治験機器を治験機器提供者に返却する（3.4 に送付先住所）。

### 6.3. 治験機器の追加納入

治験機器管理者は、治験機器の追加納入が必要となった場合、治験調整医師に連絡する。追加納入に関する手順は、本手順 11.1 に準ずる。

### 6.4. 治験機器の保管・管理

治験機器管理者は本手順 8. 保存条件に従い、治験機器を適切に保管・管理する。

### 6.5. 治験機器出庫の準備

治験機器管理者・治験機器管理補助者は、最初の被験者の同意取得日までに、治験機器の出庫指示等の方法を治験責任医師と相談の上、決定する。

### 6.6. 治験機器の出庫

治験機器管理者は、治験責任医師又は治験分担医師の出庫指示に従って治験機器を出庫する。その際、治験機器管理表に必要事項を記載する。

治験機器の提供及び管理に関する手順書 3.0 版  
作成年月日：2021年9月10日

- 1) 出庫指示の方法は、治験機器管理者と治験責任医師が協議して決定するが、治験責任医師、治験分担医師又は CRC が被検者の来院予定表を治験機器管理者に提出することで、出庫指示とすることが出来る。被検者の来院予定が変更になった場合は、治験責任医師、治験分担医師又は CRC が治験機器管理者に連絡する。
- 2) 治験機器管理者あるいは治験機器管理補助者、アンブラインドスタッフは、治験責任医師又は治験分担医師の出庫指示に従って治験機器を出庫する。その際、治験機器管理表に必要事項を記載する。

## 7. 使用方法

本治験機器 (MyTES30 改良型) には細かな設定をデフォルトとして組み込んであり、通常の治療は電源投入後に 2 プッシュで開始できる。

操作は、TES 操作マニュアル：治療群両眼用 (付録 1) 及びシャム群両眼用 (付録 2) の手順に従い実施する。なお、治療群両眼用及びシャム群両眼用のマニュアルの手順はステップ S8 及び T8「デフォルト設定変更」とステップ S10 及び T10 の電極コードが異なる以外共通である。

### 7.1. 治験機器の使用前点検

以下の作業・操作 (7.1.~7.6.) はアンブラインドスタッフが実施し、盲検性を確保するためにブラインドスタッフは治療を実施する場所の近辺に立ち入らない。

- 1) 治験機器一式を (シャム及び治療用リード線及び電極を含む) 保管庫から出庫し、搬出者は治験機器管理表 (本体) 及び (電極パッド) に必要事項を記録し、使用前点検を実施する。
- 2) 使用前点検は治療用リード線を用い、TES 操作マニュアルの治療前点検の手順 (ステップ 1~5) に従い治験機器が正常に作動することを確認し、点検実施者が記録する (治験機器管理表 (本体))。
- 3) 点検実施者は治験機器による治療準備を実施するアンブラインドスタッフに治験機器一式を引き渡す。

### 7.2. 使用前準備

- 1) AC アダプターを本体に接続し、電源コードを壁面等の商用電源のコンセントに接続し、被験者に割付けられた電極リード線を本体の電極接続コネクタ (R, COM, L) に接続する。使用しない電極リード線を盲検維持のため保管する。例えば、治験機器の保管庫に戻し施錠し保管する。
- 2) 電極パッド装着前、被験者の顔の皮脂や化粧等、良く落とす。
- 3) 電極パッドを装着する。
  - ① 両眼治療時：被験者の両眼の下眼瞼耳側及び前額部の中央に電極パッドを装着し (図 A)、電極パッドの突起に電極と機器を接続するケーブルを接続する。
  - ② 片眼治療時：被験者の治療眼の真上の額部及び治療眼瞼真下の頬に黒眼部分が電極パッドのほぼ左右の中心になるように装着し (図 B)、電極パッドの突起に電極と機器を接続するケーブルを接続する。
- 4) 電源スイッチ (3) を ON にして装置の電源を入れる。本体の液晶ディスプレイ (10) に「右 1000  $\mu$ A」(上段) と「左 1000  $\mu$ A」(下段) が表示される。

治療機器の提供及び管理に関する手順書 3.0 版  
作成年月日：2021年9月10日

- 5) 「非常停止ボタン（図3の7）を2回押し、ディスプレイを「断線検知」画面にし、ジョグスイッチ（図3-8：ダイヤル）で断線検知の無効（シャム群）もしくは有効（治療群）を選択する。

シャム群：「断線検知」無効を選択

治療群：「断線検知」有効を選択

- シャム群として無効を選択すると、電極コードに電流が流れていないことを検知せず、治療時間タイマーのカウントダウンが開始・継続し、治療時間経過後にディスプレイに「治療終了」が表示される。
- 治療群として有効を選択すると、予期せぬ電極コードの断線及び電極パッドのはく離による通電遮断が検出可能となる（「断線検出時」の項参照）。

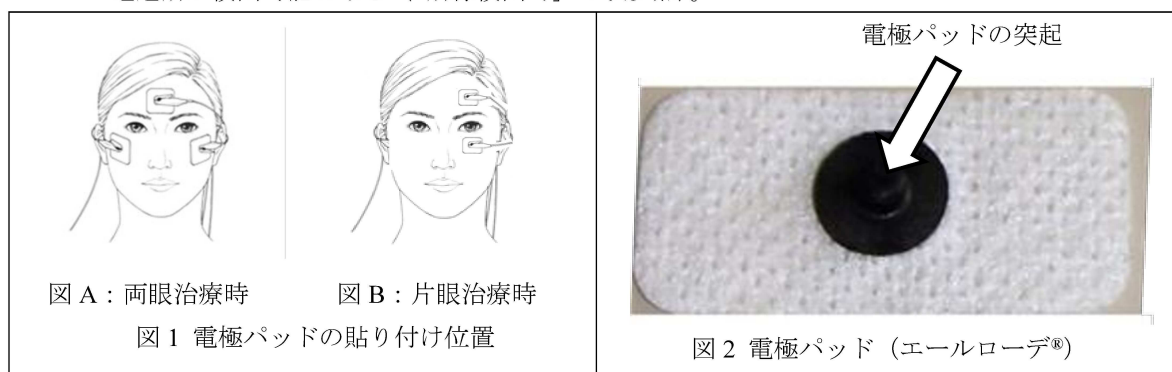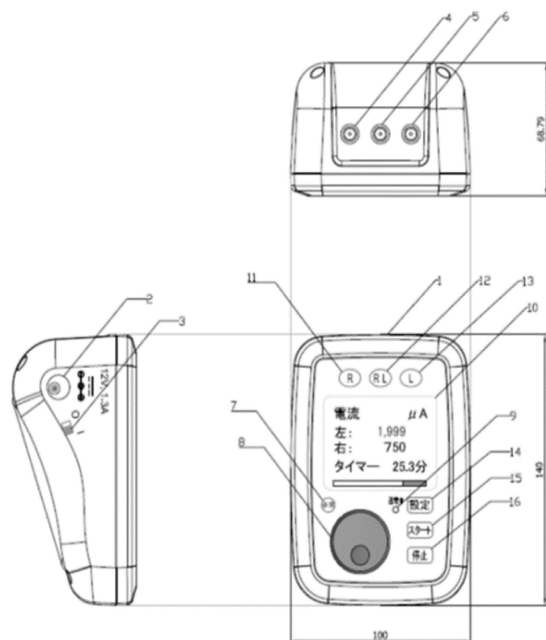

1. 本体
2. ACアダプタジャック
3. 電源スイッチ
4. 電極コネクタ（R）
5. 電極コネクタ（COM）
6. 電極コネクタ（L）
7. 非常停止ボタン
8. ダイヤル
9. 通電中ランプ
10. 液晶ディスプレイ
11. ボタンスイッチ（R）
12. ボタンスイッチ（RL）
13. ボタンスイッチ（L）
14. ボタンスイッチ（設定）
15. ボタンスイッチ（スタート）
16. ボタンスイッチ（ポーズ）

図3 各部の名称



治療機器の提供及び管理に関する手順書 3.0 版  
作成年月日：2021年9月10日

### 7.3. 設定

本治療ではデフォルト設定（納入時の設定）を変更しないが、参考までにデフォルトを変更する場合の操作を記載する。

- 1) デフォルト設定（納入時の設定）：電流上昇時間 20 秒、断線検知有効、治療時間 30 分、治療電流 1000  $\mu\text{A}$  に設定されている。
  - 網膜色素変性では両目が治療眼となるため、両眼（RL）を選択し、ボタン RL（12）を押す。
  - 片眼が治療眼の場合は、治療眼のボタン R（11）、L（13）のいずれかを選択する。
- 2) 電源投入後、非常停止ボタン（7）を押す。
- 3) 「電流上昇時間 10 / 20 / 30 秒」と表示され「20 秒」が太字で選択されている。変更したい場合は、ダイヤル（ジョグスイッチ、8）で秒数を選択し「設定」（14）を押す。
- 4) 非常停止ボタン（7）をもう一回押すと、「断線検知」設定が可能になる。「有効」が選択されている。変更したい場合は、ダイヤル（8）で「有効」又は「無効」を選択し「設定」（14）を押す。
- 5) 治療時間は 30 分で設定されている。変更したい場合は、初期画面で「停止」（16）を押すと「治療時間 30 分」の表示が出る。ダイヤル（8）で最大 720 分までの時間を選択できる。新しく設定した時間は 1 回のみ有効で、次には 30 分に戻る。電源を再投入してもデフォルト設定に戻る。

### 7.4. 経皮膚電気刺激の施行

初診：治療電流を 1000  $\mu\text{A}$ （1 mA）又は任意の電流に設定する場合

- 1) 電源スイッチ（3）を ON にして装置の電源を入れる。本体の液晶ディスプレイ（10）に「右 1000  $\mu\text{A}$ 」（上段）と「左 1000  $\mu\text{A}$ 」（下段）が表示される。
- 2) 最上段の「R」（右眼、11）、「RL」（両眼、12）、「L」（左眼、13）の中から治療する眼を選択する（網膜色素変性を対象とした本治療では両眼が治療眼であるため「RL」（12）を選択する）。「設定」（14）を押すと、カーソル（右 1000  $\mu\text{A}$  表示左側のピンク色バー）が「右」から「左」に移り（下に移動）、更にもう 1 回「設定」（14）を押し、「TEST」の下にカーソルを移動させる。
- 3) ダイヤル（ジョグスイッチ、8）を右に回すと「TEST」が点灯する。「スタート」（15）を押すと画面に「ジョグスイッチを操作して知覚電流を確認して下さい。」と表示され、「通電中」の赤ランプ（9）が点滅する。
- 4) 知覚電流は全て「0」と表示され、カーソルは「右」（右眼）にある。ダイヤル（8）をゆっくり右に回すと右眼の電流値が上昇し、実電流が表示される。
- 5) 治療電流（本治療では 1000  $\mu\text{A}$ ）を決めたら「設定」（14）を押しカーソルを「左」（左眼）に移動させる。決めた治療電流は知覚電流横に表示される。
- 6) 同様に左眼もダイヤル（8）をゆっくり右に回すと左眼の電流値が上昇し、実電流が表示される。
- 7) 治療電流を決めたら「スタート」（15）を押し治療開始。「そのままお待ちください。コードの状態を確認しています。」と表示される。コードが断線していないか、電極が外れていないかが自動で確認される。確認が終わり、電流（値）が設定値まで達すると、ディスプレイのタイマーカウントダウンが始まる。通電中は「通電中」ランプ（9）が点滅し、ディスプレイには $\infty$ マーク（ディスプレイ最上段の中央）が動き、電気が流れていることを示す。ディスプレイ下段には、タイマーの残り時

治療機器の提供及び管理に関する手順書 3.0 版  
作成年月日：2021年9月10日

間を示す棒グラフも同時表示される。

- 8) 設定時間（通常 30 分）が終了すると自動的に電流は停止し治療は終了する。

#### 再診（2回目以降の治療）

- 1) 電流設定作業はせずに、すぐ治療モードに入ることができる。本試験では 1000  $\mu$ A（1 mA）で 30 分の通電を行う。
- 2) 最上段の「R」（右眼、11）、「RL」（両眼、12）、「L」（左眼、13）の中から治療する眼を選択する（網膜色素変性を対象とした本試験では両眼が治療眼であるため「RL」（12）を選択する）。
- 3) 「スタート」（15）を押せば「そのままお待ちください。コードの状態を確認しています。」と表示され、治療モードに入る。確認が終わり、電流（値）が設定値まで達すると、ディスプレイ（10）のタイマーカウントダウンが始まる。後は初診と同じで、設定時間（通常 30 分）が終了すると自動的に電流は停止し治療は終了する。

#### 断線検出時

- 1) 治療中に電極が外れてしまった場合や、コードが断線した場合には「断線検出」され、通電は自動的に停止する。例えば、通電中に左眼用電極が外れてしまった場合、「左 断線 電極貼付け後 再スタート」という表示が出る。この表示通り、外れた電極を正しい位置に戻す。
- 2) 再度「スタート」ボタン（15）を押すと、「そのままお待ちください。コードの状態を確認しています。」と表示され、電流が再度流れ、タイマーはリセットされることなく、継続して残り時間が表示される。

#### 盲検性確保のための対応

- 1) アンブラインド医師は施行の実施をカルテ等に記録する（盲検性に係る情報は記載しない）。
- 2) アンブラインド医師は、被験者から何らかの症状の訴えがあったとしてもカルテには記載しない。

#### 7.5. 治療の一時中断/再開

- 1) 治療を一時中断する場合は、「停止」（ポーズボタン、16）を押す。「通電中」ランプ（9）が消灯し、タイマーもその時点でカウントが停止する。
- 2) 再開する場合はスタートボタン（15）または停止ボタン（16）を押して、電流（値）が設定値まで達すると、タイマーカウントダウンが再開前の時間から始まる。

#### 7.6. 非常停止

- 1) 何らかの理由で、治療を中断したい場合は、「非常停止」ボタン（7）を押すと直ちに電気刺激は終了し通電中ランプ（9）が消灯し、「非常停止しました」と表示されるランプ（8）が点灯する。解除は「設定」ボタン（14）を押す。

治験機器の提供及び管理に関する手順書 3.0 版  
作成年月日：2021年9月10日

## 8. 不具合及び不測の事態への対応

- 1) 供給時・管理保管中の治験機器に不具合、紛失及び破損等の不測の事態が起こった場合は、治験責任医師又は治験機器管理者は「不具合等報告書（不具合・返却・紛失・廃棄）兼 回収書（様式3）」を作成し、治験機器提供者及び治験調整医師（代表）に報告する。
- 2) 治療準備中及び治療中の治験機器に不具合、紛失及び破損等の不測の事態が起こった場合は、アンブラインドスタッフは「不具合等報告書（不具合・返却・紛失・廃棄）兼 回収書（様式3）」を作成し、治験機器提供者に報告するとともに、治験責任医師及び治験調整医師（代表）に不具合及び不測の事態が発生した旨のみを報告し、原本はアンブラインドスタッフのCRCがキーオープン時まで適切に保管し、その後治験責任医師に移管する。
- 3) ブラインド医師が被験者の安全性を評価する際、盲検性に係る情報が無いと適切な対応が出来ない場合にはキーオープン手続きをとる。
- 4) 「不具合等報告書（不具合・返却・紛失・廃棄）兼 回収書（様式3）」作成時に疑義がある場合にはアンブラインドCRAに内容確認を依頼する。実施医療機関のアンブラインドスタッフより依頼があった場合にアンブラインドCRAは不具合等報告書（様式3）を確認する。
- 5) 治験機器の不具合の場合は、治験責任医師、治験分担医師、治験機器管理者もしくはアンブラインドスタッフは治験機器提供者に迅速な修理を依頼し、措置報告書（修理報告書、様式は規定しない）を入手する。盲検性の維持に係る事項に関してはキーオープンまでアンブラインドスタッフが措置報告書を保管し、治験責任医師には修理完了等のみの報告を行う。キーオープン後治験責任医師に措置報告書に移管する。治験責任医師、治験分担医師もしくは治験機器管理者は、治験調整委員会に治験機器の不具合への対応を報告すると共に適切に保管する。
- 6) 紛失、破損等の不測の事態の場合は、治験分担医師、治験責任医師及び治験調整委員会は、再発防止策を検討し、講じた措置内容及び実施時期を記録し適切に保管（様式は規定しない）する。必要に応じ、治験機器提供者に措置報告書を提出する。

## 9. 治験機器の保管場所への返還

- 1) アンブラインドスタッフは、経皮膚電気刺激施行後に治験機器を保管庫に返還し必要事項を記載した後、治験機器管理者あるいは治験機器管理補助者に連絡する。返還は、原則治験機器使用後の同日に行う。

## 10. 治験期間中の治験機器保管

治験機器は、施行日以外は鍵の掛かる部屋もしくは保管庫で施錠して保管する。

治験実施計画書に在宅施術が可能である旨が記載されている場合は、被験者への貸し出しに関する情報（被験者コード番号、貸出日、提供電極パット数、返却日、処分方法及び処分日）を治験機器管理者が治験機器管理表に記載する。

## 11. 保守

1年に1度、治験機器提供者による点検を受け保守点検記録を残す。記録は治験機器管理者が適切に保

治験機器の提供及び管理に関する手順書 3.0 版  
作成年月日：2021 年 9 月 10 日

管する。

## 12. 治験機器の治験機器提供者への返却

### 12.1. 不具合及び不測の事態発生時の治験機器提供者への返却

#### 12.1.1. 使用前準備から保管庫への返還までに生じた盲検性維持に関する配慮が必要な不具合の場合

- 1) 使用前準備から保管庫への返還までに生じた不具合やその他問題については、アンブラインドスタッフが盲検性を維持しながら「不具合等報告書（不具合・返却・紛失・廃棄）兼 回収書（様式 3）」を作成し治験責任医師に報告する。治験責任医師は「不具合等報告書（不具合・返却・紛失・廃棄）兼 回収書（様式 3）」を確認後、当該治験機器を治験機器提供者に返却する。
- 2) 治験責任医師及び治験調整委員会は、治験機器提供者により作成された不具合の原因に関する報告書を受領しアンブラインドスタッフによる確認後、キーオープンまで盲検性を維持し適切に保管する。

#### 12.1.2. 盲検性維持に係る配慮が不要な際の不具合等

- 1) 治験責任医師は、「不具合等報告書（不具合・返却・紛失・廃棄）兼 回収書（様式 3）」を作成し、当該治験機器を治験機器提供者に返却する。
- 2) 治験責任医師及び治験調整委員会は、治験機器提供者により作成された不具合の原因に関する報告書を受領し適切に保管する。

### 12.2. 未使用治験機器の取扱い

- 1) 治験機器管理者は、未使用治験機器を、治験機器提供者に返却するまでの期間、他の治験機器と区分して保管し、廃棄・処分は行わない。
- 2) 治験機器管理者は、未使用治験機器を紛失、廃棄・処分した場合、その数量・理由等を「不具合等報告書（不具合・返却・紛失・廃棄）兼 回収書（様式 3）」に記載し、治験機器提供者及び治験調整医師（代表）に報告し、原本を適切に保管する。

### 12.3. 使用済治験機器の取扱い

- 1) 治験機器管理者は、被験者に使用するために内包を破いた治験機器（以下、「使用済治験機器」という）を適切に廃棄・処分あるいは治験機器提供者に返却する。使用済治験機器の取り扱いについては、事前に治験調整委員会と治験機器提供者の間で取り決め文書化する。
- 2) 治験調整委員会は、使用済治験機器の取り決め文書を実施医療機関の治験責任医師に送付する。
- 3) 治験機器管理者は、使用済治験機器を治験機器提供者に返送する場合に備え、外箱及び内包を治験終了時まで適切に保管する。

### 12.4. 未使用治験機器及び使用済治験機器の返却

- 1) 治験終了後、治験機器管理者は、未使用治験機器及び使用済治験機器の数量と「治験機器管理表」に記載の数量との整合性を確認する。

治験機器の提供及び管理に関する手順書 3.0 版  
作成年月日：2021年9月10日

- 2) 治験機器管理者は、治験機器の数量に矛盾が生じた場合は、その理由について確認し、「治験機器管理表」に記録する。
- 3) 治験責任医師は、治験機器の返却にあたり「治験機器返却書 兼 受領書（様式5）」を作成する。
- 4) 治験責任医師は、「治験機器返却書 兼 受領書（様式5）」、「治験機器管理表」（写）、未使用治験機器及び使用済治験機器の外箱及び内包を治験機器提供者に返却する。その際、治験機器の外箱及び内包、「治験機器管理表」（写）等に被験者氏名及びカルテ番号等、治験機器提供者が容易に被験者を特定できるような情報が記載されている場合は、マスキング等で判読不能となるようにする。
- 5) 治験責任医師は、治験機器提供者から送付される「治験機器返却書 兼 受領書（様式5）」を受領し、適切に保管する。

### 13. 治験に関係する医師等に対するガイダンス

#### 13.1. 禁忌

心臓ペースメーカーなどの心臓疾患や妊娠時等の使用禁止。

#### 13.2. 警告

- 3) 電極は単回使用で、複数回の使用は接着力が低下し痛みを伴う恐れがある。
- 4) 電極の接続プラグは電極接続端子以外に接続しないこと。感電の恐れがある。
- 5) 片眼当たり1日1回30分を超える治療はしないこと。皮膚等の炎症の恐れがある。

#### 13.3. 注意

##### 一般的な注意

- 1) 電極の接触面が減ると単位面積当たりの電流が増えて痛みを感じる。貼り付け面全体が皮膚に当たるよう装着すること、装着後に外れる箇所が出る場合には被験者自身の手で軽く押さえつけると改善できる。
- 2) 本装置の接続端子には、定められたもの以外は接続しないこと。それ以外のものを接続すると感電や故障の原因になる。
- 3) 本装置は眼科専用の治験機器（治療機器）である。眼科以外の用途には使用しないこと。
- 4) 本装置を水や薬品などで濡らさないこと。感電や故障の原因になる。
- 5) 本装置の上に水や薬品等を置かないこと。それらが本装置内に入ると、感電や故障の原因になる。

##### 準備上の注意

電極を被験者に貼りつける際に、皮膚との接着が不十分な場合はテープ等を使い、貼り付け面全体が皮膚に接触するようにすること。

### 14. 資料等の保管

治験責任医師及び治験調整委員会は、別途定める「記録の保存に関する手順書」に従い、本手順書に規定された手順に係る様式及び関連資料を保管する。

治験機器の提供及び管理に関する手順書 3.0 版  
作成年月日：2021 年 9 月 10 日

## 15. 改訂履歴

| 版番号   | 改訂日             | 改訂理由／内容                |
|-------|-----------------|------------------------|
| 1.0 版 | 2021 年 3 月 18 日 | 新規作成                   |
| 2.0 版 | 2021 年 5 月 25 日 | 盲検・非盲検スタッフの業務手順の明確化のため |
| 2.1 版 | 2021 年 7 月 1 日  | 記載整備                   |
| 3.0 版 | 2021 年 9 月 10 日 | 盲検性確保手順の明確化のため         |

治験機器の提供及び管理に関する手順書 3.0 版  
作成年月日：2021 年 9 月 10 日

様式 1

20 年 月 日

## 治験機器提供依頼書

治験機器提供者  
有限会社メイヨー 殿

治験調整医師（代表）  
千葉大学医学部附属病院 山本 修一 殿

〇〇病院 〇〇科

治験責任医師：\_\_\_\_\_ 印

治験機器（経皮膚電気刺激装置）について、下記のとおり供給願います。

記

治験課題名：網膜色素変性を対象とした経皮膚電気刺激装置の有効性及び安全性を検証する  
シャム対照二重遮蔽比較試験

|                                                     |                                   |   |
|-----------------------------------------------------|-----------------------------------|---|
| <input type="checkbox"/> 治験機器一式（本体、電極リード線、AC アダプター） |                                   | 式 |
| <input type="checkbox"/> 治験機器構成機材のみの<br>供給依頼        | <input type="checkbox"/> 本体       | 台 |
|                                                     | <input type="checkbox"/> 電極リード線   | 組 |
|                                                     | <input type="checkbox"/> AC アダプター | 台 |
| 電極パット（1 組 3 枚）                                      |                                   | 組 |
| 納入希望日時                                              | 20 年 月 日<br>時～ 時                  |   |

以上

原本：治験責任医師保管、  
写：治験機器提供者（有限会社メイヨー）、治験調整医師

治験機器の提供及び管理に関する手順書 3.0 版  
作成年月日：2021 年 9 月 10 日

様式 2

20 年 月 日

## 治験機器納入書 兼 受領書

治験責任医師

〇〇病院 〇〇科 〇〇 〇〇殿

治験調整医師（代表）

千葉大学医学部附属病院 山本 修一 殿

治験機器提供者

有限会社メイヨー 印

治験機器（経皮膚電気刺激装置）について、下記のとおり納入致します。

記

治験課題名：網膜色素変性を対象とした経皮膚電気刺激装置の有効性及び安全性を検証する  
シヤム対照二重遮蔽比較試験

|                                                              |                                                                                                                |   |
|--------------------------------------------------------------|----------------------------------------------------------------------------------------------------------------|---|
| <input type="checkbox"/> 治験機器一式（本体、電極リード線、AC アダプター）          |                                                                                                                | 式 |
| <input type="checkbox"/> 治験機器構成機材のみの納入                       | <input type="checkbox"/> 本体                                                                                    | 台 |
|                                                              | <input type="checkbox"/> 電極リード線                                                                                | 組 |
|                                                              | <input type="checkbox"/> AC アダプター                                                                              | 台 |
| 電極パット（1組3枚）                                                  |                                                                                                                | 組 |
| 添付書類： <input type="checkbox"/> 有、 <input type="checkbox"/> 無 | <input type="checkbox"/> 製造に関する記録<br><input type="checkbox"/> 品質に関する試験の記録<br><input type="checkbox"/> 校正に関する記録 |   |
| 納入希望日時                                                       | 20 年 月 日<br>時～ 時                                                                                               |   |

以上

治験機器提供者 殿

治験機器機材について、上記のと通りの受領を確認致しました。

治験責任医師（記名押印又は署名）

確認日：20 年 月 日

原本：治験責任医師保管

写：治験機器提供者（有限会社メイヨー）、治験調整医師



治験機器の提供及び管理に関する手順書 3.0 版  
作成年月日：2021 年 9 月 10 日

様式 3

20 年 月 日

## 不具合等報告書（不具合・返却・紛失・廃棄） 兼 回収書

治験機器提供者 有限会社メイヨー 殿

治験調整医師（代表） 千葉大学医学部附属病院 山本 修一 殿

〇〇病院 〇〇科

治験責任医師・アンブラインドスタッフ：\_\_\_\_\_ 印

治験機器の不具合・返却・紛失・廃棄について、下記のとおり報告致します。

記

治験課題名：網膜色素変性を対象とした経皮膚電気刺激装置の有効性及び安全性を検証する  
シャム対照二重遮蔽比較試験

|             |   |                                                                                                          |   |
|-------------|---|----------------------------------------------------------------------------------------------------------|---|
| 本体製造番号      |   | <input type="checkbox"/> 未使用、 <input type="checkbox"/> 使用済（治験使用）<br><input type="checkbox"/> 使用済（不具合による） |   |
| 本体製造番号      |   | <input type="checkbox"/> 未使用、 <input type="checkbox"/> 使用済（治験使用）<br><input type="checkbox"/> 使用済（不具合による） |   |
| 電極パット(1組3枚) |   |                                                                                                          | 組 |
| ACアダプター     | 台 | 電極リード線                                                                                                   | 組 |

不具合・返却・紛失・廃棄（外箱、内包を含む）の理由

以上

治験責任医師／アンブラインドスタッフ 殿

治験機器に関する上記内容を確認・回収致しました。

確認者（記名押印又は署名）

確認日：20 年 月 日 \_\_\_\_\_

原本：治験機器提供者（有限会社メイヨー）保管

写：治験責任医師、治験調整事務局

治験機器の提供及び管理に関する手順書 3.0 版  
作成年月日：2021 年 9 月 10 日

様式 4

20 年 月 日

## 治験機器定期点検依頼書 兼 受領書

治験機器提供者  
有限会社メイヨー 殿

写) 治験調整事務局

〇〇病院 〇〇科

治験責任医師: \_\_\_\_\_ 印

下記治験機器（経皮膚電気刺激装置）について、定期点検を依頼致します。

記

治験課題名：網膜色素変性を対象とした経皮膚電気刺激装置の有効性及び安全性を検証する  
シヤム対照二重遮蔽比較試験

|           |      |
|-----------|------|
| 本体数（製造番号） | 台（ ） |
|-----------|------|

送付先：〒492-8213 愛知県稲沢市高御堂二丁目 25 番 22 号

有限会社メイヨー 吉川 眞男 Tel : 0587-33-0120

返送先: \_\_\_\_\_

以上

治験責任医師 殿

定期点検対象の上記治験機器を受領致しました。

有限会社メイヨー（記名押印又は署名）

受領日：20 年 月 日 \_\_\_\_\_

原本：治験機器提供者（有限会社メイヨー）保管

写：治験責任医師、治験調整事務局

治験機器管理表（本体）

様式 5

2020年 月 日

## 治験機器返却書 兼 受領書

治験責任医師

〇〇病院 〇〇科

〇〇 〇〇殿

写) 治験調整事務局

治験機器提供者

有限会社メイヨー 印

下記治験機器（経皮膚電気刺激装置）について、点検を終了し返却致します。

記

治験課題名：網膜色素変性を対象とした経皮膚電気刺激装置の有効性及び安全性を検証する  
シャム対照二重遮蔽比較試験

|           |                 |
|-----------|-----------------|
| 本体数（製造番号） | 台（ ）            |
| 添付資料      | 治験機器の校正結果報告書 1部 |

以上

治験機器提供者 殿

上記治験機器（経皮膚電気刺激装置）の点検後の返却を確認致しました。

治験責任医師（記名押印又は署名）

受領日：20 年 月 日
